# Supplementary material for: A-MYB/TCFL5 regulatory architecture ensures the production of pachytene piRNAs in placental mammals
Source: RNA. 2023 Jan;29(1):30–43. doi: 10.1261/rna.079472.122 (PMC9808571; doi:10.1261/rna.079472.122)
Supplement: Supplemental Material [file supp_079472.122_Supplemental_Table_S1.xlsx]

## Sheet: Table S1A
Table S1A. A-MYB and TCFL5 occupancy around the promoters of piRNA maturation genes and Btbd18 gene; transcript abundance in C57Bl/6 and TCFL5em1/em1; transcript abundance in primary spermatocytes of C57BI/6 and Tcfl5+/em1
	CUT&RUN												ChIP-seq												RNA-seq (rpkm)
																									C57BL/6 mice						Tcfl5em1/em1 mice		SPI; C57BL/6 mice			SPI; Tcfl5em1/em1 mice
Gene	A-MYB signal (RPM) trial 1	TCFL5 signal (RPM) trial 1	No antibody sigal (RPM) trial 1	A-MYB signal (RPM) trial 2	TCFL5 signal (RPM) trial 2	No antibody sigal (RPM) trial 2	Distance, TSS to summit of nearest A-MYB peak (bp) trial 1	Distance, TSS to summit of nearest TCFL5 peak (bp) trial 1	Distance, TSS to summit of nearest background peak (no antibody bp) trial 1	Distance, TSS to summit of nearest A-MYB peak (bp) trial 2	Distance, TSS to summit of nearest TCFL5 peak (bp) trial 2	Distance, TSS to summit of nearest background peak (no antibody bp) trial 2	A-MYB signal (RPM) trial 1	A-MYB input signal (RPM) trial 1	TCFL5 signal (RPM) trial 1	TCFL5 input signal (RPM) trial 1	TCFL5 signal (RPM) trial 2	TCFL5 input signal (RPM) trial 2	TCFL5 signal (RPM) trial 3	TCFL5 input signal (RPM) trial 3	Distance, TSS to summit of nearest A-MYB peak (bp) trial 1	Distance, TSS to summit of nearest TCFL5 peak (bp) trial 1	Distance, TSS to summit of nearest TCFL5 peak (bp) trial 2	Distance, TSS to summit of nearest TCFL5 peak (bp) trial 3	trial 1	trial 2	trial 3	trial 4	trial 5	trial 6	trial 1	trial 2	Trail 1	Trail 2	Trail 3	Trail 1	Trail 2	Trail 3
Piwil1	1.63439	7.48792	0	0.886487	2.00088	0	0	0	8416074	1562	0	5642717	35.4354	2.2028	7.5291	0.26042	14.9362	0.34709	2.75629	0.304372	0	0	0	0	75.5192	62.8987	71.4657	74.6347	69.5386	66.6199	129.56	126.77	164.869	163.075	211.687	55.9074	75.809	170.901
Piwil2	1.11961	10.1696	0	0.502017	2.45222	0	0	0	34286678	40143	0	34286691	5.23187	0.975196	9.00219	0.26042	14.2897	0.295026	3.43795	0.138351	0	0	0	0	34.6596	39.6276	43.2782	43.2967	45.6025	45.9456	61.9796	63.2456	31.2828	24.0945	33.1883	46.9515	33.2166	47.3711
Pld6	2.75991	8.84537	0	1.40259	2.36282	0	0	0	5646940	8740	0	5646991	18.9207	2.2028	15.9935	0.238719	18.3248	0.399153	4.91983	0.387383	0	0	0	0	26.7061	25.7891	34.2603	35.6028	33.9441	42.7233	11.8308	8.99838	50.364	56.9799	77.2146	10.3928	18.9185	49.7569
Henmt1	0.852527	5.30151	0	0.409421	1.61858	0	27435	0	12894906	3069	0	12894879	10.6992	2.08807	11.2001	0.282122	18.7483	0.208254	3.26012	0.110681	52	0	0	0	9.99089	9.5976	10.4071	10.776	9.13253	8.83518	0.743645	0.478945	15.8854	17.1218	21.3166	4.59394	3.30533	5.79354
Ddx39	2.94069	11.8859	0	1.74912	3.30129	0	0	0	28340968	6874	0	28340997	14.8663	1.17024	6.96793	0.325526	9.67512	0.295026	2.40064	0.249032	0	0	0	0	9.61922	10.0351	10.0864	10.8008	11.6928	11.6297	15.8123	14.5432	14.7865	15.3555	17.956	25.8995	26.227	36.9735
Tdrd12	1.53098	5.06234	0	0.825937	1.53164	0	0	0	23526895	7699	0	15506279	13.4534	2.08807	8.04351	0.238719	14.8917	0.295026	2.371	0.304372	0	0	0	0	16.435	19.8376	17.3132	16.4919	17.8189	19.4787	25.3683	29.241	18.5137	13.2861	16.3704	17.8716	14.2673	21.5726
Tdrd5	0.700025	1.65872	0	0.287216	0.626473	0	348	308	22707677	28	4972	22707695	2.40605	0.608064	1.61338	0.217017	1.62738	0.104127	0.4742	0.0553404	30	45	34	254770	15.9597	15.3055	17.5976	16.2482	15.4055	17.3418	30.7676	30.6772	20.7431	18.2363	23.2018	9.96672	10.7072	17.6325
Tdrd6	0.879313	3.33545	0	0.16856	0.734994	0	0	0	3782249	8644	473514	3782249	4.01349	1.2276	4.81675	0.173614	4.88215	0.15619	2.1339	0.276702	0	0	0	0	108.995	114.818	101.246	125.894	115.855	92.1518	22.3492	23.2292	219.393	198.257	206.482	15.6491	21.6678	49.9981
Tdrd9	1.33682	3.34709	0	0.973091	1.24308	0	0	0	14909738	4093	0	14909777	3.76777	1.76683	4.13867	0.347227	8.00315	0.381799	1.54115	0.138351	0	0	0	0	24.3834	28.9397	22.4408	25.0463	30.4687	27.2208	39.5153	42.1642	36.8152	33.6726	36.1525	27.0389	19.9069	32.7096
Mael	0.906102	5.09837	0	0.517431	1.49095	0	0	0	17060380	35644	0	17060382	3.19441	1.57179	3.2969	0.195315	4.99361	0.225608	1.12623	0.193691	0	0	0	0	315.48	339.39	367.355	376.649	392.906	424.781	168.957	154.533	322.734	254.96	268.004	80.5746	79.2689	124.129
Mov10l1	1.91931	6.9256	0	0.591066	1.90037	0	0	0	13895870	2008	0	13895868	14.1394	1.98481	8.76836	0.347227	15.3821	0.242963	2.99339	0.249032	0	0	0	0	21.2219	22.803	20.1394	22.5111	22.7379	21.5407	46.5172	43.9933	20.8127	14.7287	16.3877	47.6743	32.7709	30.6949
Tdrd1	0.546043	2.63289	0	0.367947	1.01247	0	558026	0	4373446	7593	0	4373485	6.34787	3.02885	5.54161	0.217017	6.79933	0.295026	2.01535	0.166021	110	0	0	0	33.3593	37.2403	43.1703	40.4762	39.3785	41.5386	47.2713	50.6528	40.3924	34.4769	46.2175	25.4652	27.8994	47.1078
Fkbp6	0.252953	2.87236	0	0.083173	1.28377	0	0	0	1802204	649	0	971018	10.1668	2.30605	15.9467	0.282122	31.2769	0.399153	4.80128	0.221362	0	0	0	0	18.5306	17.097	18.3593	18.4479	20.0735	23.5745	39.3512	33.8219	11.5926	8.72908	12.2924	56.0487	36.1538	34.2709
Ddx4	0.304266	1.55064	0	0.007211	0.324341	0	2510	0	73977	0	207	73971	1.29005	0.963724	2.05764	0.13021	1.91719	0.104127	0.533475	0.0830106	13	0	17	8111	112.68	123.712	88.9507	100.931	102.332	88.0165	114.748	117.804	86.3284	47.5762	55.4962	62.2965	41.2172	47.1199
Gpat2	0.441896	0.867483	0	0.240974	0.349622	0	229120	86480	4743513	7490	154589	4743452	0.808841	3.06326	0.584558	0.434034	1.00318	0.260317	0.444563	0.221362	158641	57316	0	88313	17.5812	18.5013	24.725	24.4377	23.9312	29.0563	42.5366	41.4495	27.1436	34.4091	40.976	33.9403	26.7813	45.5522
Gtsf1	0.662845	0.292413	0	0.220791	0.256515	0	0	71191	28343431	3810	186372	28343429	0.737172	1.25055	1.42632	0.217017	1.29299	0.312381	0.622387	0.249032	16087	0	0	64687	86.3644	89.083	100.274	97.0002	94.7931	110.928	26.1825	24.9181	43.9986	27.8047	24.1449	13.7901	13.2861	22.4252
Btbd18	0.313963	3.49012	0	0.175656	1.07782	0	17585	0	14003127	1388	0	14003159	3.30704	5.05955	10.7325	0.238719	17.5891	0.329735	3.7936	0.166021	68118	0	0	0	1.36847	1.47802	1.47182	1.25152	1.43238	1.6877	7.78736	7.72396	1.02264	0.774668	0.784206	9.66993	4.75638	4.82596

## Sheet: Table S1B
Table S1B. A-MYB and TCFL5 occupancy around the promoters of pachytene piRNA genes; transcript abundance and piRNA abundance in C57Bl/6 and TCFL5em1/em1
		CUT&RUN												ChIP-seq												RNA-seq (rpkm)								piRNA-seq (rpm)
																										C57BL/6 mice						Tcfl5em1/em1 mice		C57BL/6 mice		Tcfl5em1/em1 mice
Gene	Conservation	A-MYB signal (RPM) trial 1	TCFL5 signal (RPM) trial 1	No antibody sigal (RPM) trial 1	A-MYB signal (RPM) trial 2	TCFL5 signal (RPM) trial 2	No antibody sigal (RPM) trial 2	Distance, TSS to summit of nearest A-MYB peak (bp) trial 1	Distance, TSS to summit of nearest TCFL5 peak (bp) trial 1	Distance, TSS to summit of nearest background peak (no antibody bp) trial 1	Distance, TSS to summit of nearest A-MYB peak (bp) trial 2	Distance, TSS to summit of nearest TCFL5 peak (bp) trial 2	Distance, TSS to summit of nearest background peak (no antibody bp) trial 2	A-MYB signal (RPM) trial 1	A-MYB input signal (RPM) trial 1	TCFL5 signal (RPM) trial 1	TCFL5 input signal (RPM) trial 1	TCFL5 signal (RPM) trial 2	TCFL5 input signal (RPM) trial 2	TCFL5 signal (RPM) trial 3	TCFL5 input signal (RPM) trial 3	Distance, TSS to summit of nearest A-MYB peak (bp) trial 1	Distance, TSS to summit of nearest TCFL5 peak (bp) trial 1	Distance, TSS to summit of nearest TCFL5 peak (bp) trial 2	Distance, TSS to summit of nearest TCFL5 peak (bp) trial 3	trial 1	trial 2	trial 3	trial 4	trial 5	trial 6	trial 1	trial 2	trial 1	trial 2	trial 1	trial 2
4-qB3-3994.1	Murine-specific	2.46234	0.525206	0	0.918533	0.194859	0	0	60574	7133532	1368	59897	7133570	14.8049	0.114729	0.280588	0.195315	0.289808	0.225608	0.177825	0.249032	0	62366	63429	63461	45.34	46.2495	51.7644	46.4745	43.5406	50.6169	58.6916	52.442	3873.65	3934.02	3399.79	2778.12
10-qC1-2617.1	Murine-specific	3.13337	0.906296	0	1.06802	0.551251	0	0	0	16645648	7099	77403	16645642	16.4328	0.0688374	0.280588	0.434034	0.512737	0.208254	0.2371	0.166021	0	80375	80391	80522	8.96018	11.9741	11.809	9.37945	9.30227	11.06	10.125	9.72191	3511.53	3051.18	1754.2	1153.06
9-qC-31469.1	Murine-specific	5.80249	2.9674	0	2.83599	1.39229	0	0	0	32428168	18343	0	32428174	18.7057	0.298295	2.12779	0.238719	4.52546	0.277672	1.09659	0.193691	0	0	0	0	11.4248	15.5221	13.7414	10.4379	12.0856	13.2933	26.1853	27.6774	42271	39315.2	31241.5	23299.8
9-qF4-150.1	Murine-specific	2.20496	3.72152	0	0.996821	1.18881	0	0	0	656391	28568	0	656369	2.33438	4.29086	2.96955	0.347227	4.81527	0.225608	1.30405	0.415053	60385	0	0	46	2.47334	2.56738	1.9354	1.93062	1.718	1.61016	5.44706	5.94795	257.174	218.916	317.419	264.236
8-qE1-3748.1	Murine-specific	4.04612	0.693705	0	2.46106	0.235554	0	0	36049	448723	2108	35847	448744	14.5899	0.0573645	0.374117	0.303824	0.891716	0.138836	0.266738	0.0830106	0	15793	0	37536	7.80429	9.30917	10.1744	8.46581	8.49583	9.14615	12.113	13.8178	4910.28	4455.68	2347.61	1784.81
6-qD1-2831.1	Murine-specific	3.59979	1.66151	0	1.25077	0.561119	0	0	0	19963965	6113	0	19963975	13.2179	0.493335	1.37956	0.282122	2.76432	0.329735	0.35565	0.110681	0	72	0	12019	7.74192	7.6349	8.73383	7.80879	7.29754	7.27705	7.94777	6.92153	3774.28	3290.91	2511.34	1806.14
2-qG3-1029.1	Murine-specific	2.21313	0.315402	0	0.764281	0.208424	0	0	86494	32428326	3877	85423	32428332	28.7395	0.0917832	0.163676	0.173614	0.579615	0.208254	0.177825	0.276702	0	87625	0	87766	8.71968	11.4031	9.65638	8.09484	7.42055	8.02188	12.5918	15.1641	2101.12	1626.26	1028.03	734.286
1-qE3-706.1	Murine-specific	1.06082	0.671809	0	0.363179	0.080167	0	0	258077	15661387	2137	2597448	15661376	1.88388	0.263877	1.09897	0.13021	1.31528	0.173545	0.444563	0.138351	0	0	0	259875	24.3463	26.0891	30.6913	30.0029	31.3177	34.9922	6.39861	5.97102	990.903	998.571	209.227	154.906
11-qB1.3-590.1	Murine-specific	1.67157	2.76536	0	0.825937	0.839818	0	0	0	15320399	6624	0	15320409	7.90412	0.0688374	0.678087	0.13021	1.78343	0.138836	0.326012	0.110681	0	0	0	6100	48.6144	48.9134	71.0488	57.2889	62.5793	72.4316	7.9021	6.91294	787.306	718.417	161.738	118.179
6-qF3-28913.1	Murine-specific	2.73017	0.62583	0	1.82509	0.462465	0	0	235278	28445761	23361	0	26187330	28.7497	0.137675	0.350735	0.217017	1.5828	0.208254	0.266738	0.249032	0	26695	0	342785	9.65432	13.1467	13.0938	9.34336	11.0561	13.0871	12.4259	11.9991	38085	36058.4	15598.7	12284.6
10-qC1-875.1	Murine-specific	2.05841	0.5266	0	0.41663	0.179445	0	0	0	2266862	57422	66931	2266900	10.9245	0.263877	0.257205	0.390631	0.69108	0.225608	0.266738	0.221362	0	68117	68102	68127	2.9187	3.82985	3.36219	2.95627	2.96702	3.5311	1.89561	2.17707	1601.87	1394.25	332.078	223.995
10-qC1-12816.1	Murine-specific	3.25312	3.83349	0	0.867519	1.45457	0	0	0	8419706	1627	0	8419821	28.5654	0.413024	2.05764	0.217017	6.66558	0.468571	0.740938	0.249032	0	0	0	1825	10.9056	12.0631	12.6838	10.8209	10.9676	11.4848	16.7005	15.5798	13923.1	13468.8	9894.77	7167.71
pi-Gm5878.1	Murine-specific	3.00021	8.77998	0	1.43231	2.61132	0	0	0	3196293	11168	0	3196325	18.9412	4.27939	5.19087	0.238719	10.7675	0.520635	1.83753	0.332042	0	0	0	0	11.1805	14.6213	15.1744	13.2745	14.122	15.5963	0.186686	0.0997852	3637.51	3518.02	254.444	26.06
11-qE1-9443.1	Murine-specific	1.71844	0.576761	0	0.592173	0.339755	0	0	0	18136394	18764	8873	18136390	6.22501	0.103256	0.327352	0.325526	0.445858	0.242963	0.266738	0.138351	0	11482	778	11556	8.32458	9.58914	9.50818	7.82925	7.94531	9.00404	14.796	13.9921	10290.6	9570.42	6493.73	4876.49
10-qB4-6488.1	Murine-specific	1.21111	7.84433	0	0.316937	2.29932	0	0	0	17514098	11010	161	17514092	3.59371	1.26202	4.74661	0.238719	9.22926	0.242963	1.71898	0.221362	165	111	120	118	8.20824	8.96396	9.39547	7.17109	7.27842	8.23508	17.3374	17.6515	7959.62	7442.23	7694.38	6239.13
6-qC3-6258.1	Murine-specific	0.741684	0.613884	0	0.484162	0.399561	0	873	873	4840966	7006	873	4840964	0.54264	0.160621	0.327352	0.173614	0.378979	0.208254	0.177825	0.166021	966	1117	1083	1143	18.6888	27.4561	26.3236	23.7136	23.1012	24.5736	9.61803	10.6677	8768.54	8156.11	2341.69	1607.11
10-qA3-143.1	Murine-specific	2.30389	7.06304	0	1.86657	2.28945	0	0	0	1625595	2221	0	1625621	13.5967	3.41892	8.30072	0.282122	14.9362	0.451217	2.54882	0.332042	0	0	0	25	7.47201	7.40351	8.19101	6.69567	6.86265	8.28493	7.40661	6.41225	222.421	210.884	60.7721	43.0293
8-qC5-8200.1	Murine-specific	1.37774	0.476439	0	0.573211	0.159709	0	0	163923	6734610	43125	166451	6734604	5.91785	0.0917832	0.187058	0.195315	0.334394	0.173545	0.11855	0.138351	0	166106	757	166136	31.3537	32.3484	33.9101	27.6784	29.6757	32.2667	49.4874	43.3557	9694.21	9598.5	4969.68	3743.07
14-qA3-19970.1	Murine-specific	4.26929	0.966412	0	2.53813	0.421146	0	0	403537	18188472	95502	403144	18188482	30.5619	0.27535	0.514411	0.282122	1.53821	0.381799	0.296375	0.221362	0	76797	0	76827	9.96082	12.8993	12.035	9.1202	10.6884	11.6442	22.4456	21.3798	27174.4	25514.8	29449	22607.2
17-qC-935.1	Murine-specific	5.5027	1.02323	0	2.74583	0.30338	0	0	0	13335276	24321	701670	13335249	6.98266	0.114729	0.420881	0.412332	0.84713	0.277672	0.296375	0.249032	0	83464	83482	290795	195.174	200.631	299.545	247.481	298.604	336.015	153.283	128.811	1604.19	1791.81	1342.01	1088.58
4-qD2.2-2182.1	Murine-specific	2.63642	3.45379	0	1.07035	1.10126	0	0	0	4245348	8642	0	4245383	12.8391	0.332714	3.55411	0.303824	5.68469	0.329735	1.60042	0.332042	0	0	0	0	6.12659	7.51096	7.28023	6.0159	6.47972	7.62647	0.332009	0.322554	2790.54	2564.51	215.49	48.7262
6-qC3-2394.1	Murine-specific	1.27433	2.53645	0	0.473517	0.909493	0	0	0	4771087	11600	0	4771072	6.61407	0.367133	3.08646	0.151912	4.01272	0.242963	0.652025	0.221362	0	0	0	41978	9.30682	11.7143	13.3917	11.5832	11.4427	12.3065	5.57251	5.48845	2101.78	2104.26	496.156	341.81
5-qF-4633.1	Murine-specific	1.50568	0.555959	0	0.38691	0.215819	0	0	26189	5725464	26430	25121	5725498	6.72669	0.298295	0.210441	0.282122	0.624201	0.260317	0.177825	0.138351	0	11749	11780	29831	6.62681	7.1216	7.11374	5.76566	6.44386	7.05682	5.65991	5.57014	5864.54	5739.68	1853.17	1320.45
7-qF3-246.1	Murine-specific	3.21147	2.23021	0	1.73837	0.818233	0	0	0	4411993	7996	0	4412034	15.3577	0.27535	1.35617	0.13021	3.52228	0.242963	0.7113	0.221362	0	0	0	0	2.75208	2.6441	2.96077	2.41782	2.31586	2.47242	0.420542	0.328975	229.842	199.725	42.1894	21.9389
9-qA5.3-1495.1	Murine-specific	0.627143	0.271911	0	0.375044	0.215819	0	637878	239470	21402727	1833	251950	21402737	9.47061	0.0229458	0.30397	0.282122	0.445858	0.225608	0.207462	0.359713	0	36416	36378	251307	9.14481	9.18969	10.308	8.08295	6.97237	8.45429	4.93097	4.81393	2811.65	2436.81	1234.44	860.344
13-qA5-967.1	Murine-specific	0.639057	0.014734	0	0.149712	0.007419	0	446750	249488	17488596	44598	448202	17488590	5.57998	0.172093	0.30397	0.26042	0.445858	0.208254	0.2371	0.249032	0	36102	36142	249829	10.8956	12.853	14.5755	11.759	11.4997	15.1929	14.9161	15.4693	1224.65	1270.37	682.189	545.078
15-qD1-4001.1	Murine-specific	3.66302	0.875248	0	2.23794	0.351471	0	0	30724	16459680	5657	30579	16459686	13.2486	0.0344187	0.210441	0.217017	0.668787	0.260317	0.177825	0.249032	0	31329	31437	39699	4.07114	4.52781	4.47117	3.53196	3.60788	3.95712	6.67314	6.5537	6862.36	6155.63	4485.71	3203.68
pi-Tmem194.1	Murine-specific	0.823522	2.925	0	0.79034	1.53164	0	8455	0	1829524	4975	0	1829534	3.01012	1.27349	2.38499	0.282122	2.76432	0.138836	1.03731	0.0830106	0	0	0	0	15.8081	18.3981	16.1129	15.2521	14.0524	14.3276	16.8685	16.7775	3157.19	2680.09	971.321	604.713
7-qD1-654.1	Murine-specific	5.52131	0.950091	0	2.03745	0.278099	0	0	0	11776177	13277	509469	7361744	6.96218	0.114729	0.233823	0.173614	0.468151	0.15619	0.177825	0.276702	0	72714	72671	72687	16.3574	14.7888	16.3419	14.6408	12.6362	13.3065	9.82391	8.82804	753.712	703.916	222.854	173.935
10-qA3-2592.1	Murine-specific	4.11978	3.04225	0	1.65653	1.01617	0	0	0	33589593	26596	0	33589582	25.5655	0.332714	2.66558	0.26042	6.30889	0.312381	1.03731	0.221362	0	0	0	0	25.2529	27.9639	26.0206	22.6144	20.7417	22.088	3.36887	3.87365	3517.5	3207.3	394.846	187.511
7-qD1-9417.1	Murine-specific	4.63161	0.335112	0	1.88797	0.274401	0	0	451833	14046559	35718	0	14046532	11.8869	0.160621	0.30397	0.173614	0.334394	0.138836	0.177825	0.221362	0	227512	227473	451909	8.02988	10.1327	9.38208	6.81084	7.18325	8.24518	10.5377	11.0094	11870.5	10494.4	5376.44	4013.73
7-qF3-3125.1	Murine-specific	3.39967	2.30863	0	1.79769	0.913191	0	0	0	3570226	7898	0	3570247	15.2656	0.240931	1.33279	0.108509	3.43311	0.225608	0.652025	0.221362	0	0	0	0	8.2328	10	9.88484	8.09356	8.07919	9.44348	6.88931	6.57988	4792.87	4478.26	1696.04	1196.34
11-qE1-252.1	Murine-specific	0.441157	3.00482	0	0.334679	1.19621	0	20	0	5347863	73	0	5347872	2.78487	2.82233	6.57043	0.26042	7.8471	0.295026	2.96375	0.415053	305	0	0	0	3.40636	4.19885	3.76722	3.25773	3.1008	3.93982	3.0483	2.75015	485.46	423.115	206.542	154.542
1-qD-2017.1	Murine-specific	1.19919	2.06668	0	1.01933	0.787406	0	0	0	32761412	1357	0	30690310	12.45	1.69799	1.30941	0.195315	3.05413	0.364444	0.681663	0.110681	0	0	0	6227	45.2617	47.7831	65.1855	51.8001	56.4295	67.8728	51.4892	47.5802	2115.57	2092.61	769.527	592.592
4-qB3-277.1	Murine-specific	2.96821	1.98188	0	1.59598	0.85893	0	0	0	18258614	5241	0	17170964	7.10552	0.229458	1.73029	0.390631	3.23247	0.312381	0.770575	0.276702	0	0	0	22252	2.54971	3.27587	3.686	3.31862	2.99364	3.26963	2.61075	2.63484	336.926	322.579	198.559	153.936
19-qC2-1361.1	Murine-specific	2.22431	3.33048	0	1.14409	0.990284	0	0	0	4663046	30531	14747	4663039	8.07818	0.286822	3.36705	0.282122	3.90126	0.537989	0.681663	0.166021	0	0	0	55821	27.3531	23.8225	31.7543	21.2261	13.8885	21.9353	2.02218	1.06491	2736.6	2272.34	277.707	66.1803
9-qA1-178.1	Murine-specific	1.03852	2.87484	0	0.54349	1.25416	0	0	0	234463	1107	0	234456	4.70971	1.45706	4.72322	0.303824	5.70698	0.225608	1.54115	0.249032	0	0	0	0	5.71405	5.88907	6.12658	4.71065	4.01379	4.31532	6.07885	5.98023	298.444	276.92	145.013	115.997
13-qB1-1517.1	Murine-specific	3.64219	1.28958	0	1.60785	0.709712	0	0	0	12259684	3107	14767	12259736	26.6406	0.126202	0.701469	0.13021	2.00636	0.225608	0.385288	0.221362	0	16252	0	16321	42.1825	42.3713	46.9644	47.244	53.9812	54.6463	21.3824	21.6972	1835.95	1797.9	1457.22	1068.7
6-qC3-100.1	Murine-specific	1.88582	0.619159	0	1.19965	0.265758	0	0	65325	9265461	11601	68262	9265461	11.3955	0.0803103	0.491028	0.347227	1.2484	0.34709	0.2371	0.221362	0	3429	6	3525	3.62693	4.91118	4.39891	4.67083	3.71127	4.20912	8.10823	8.71307	108.749	115.738	166.693	131.633
pi-1700006A11Rik.1	Murine-specific	4.16888	0.332323	0	0.642077	0.057358	0	0	733991	10139728	7319	914873	10139701	9.42966	0.0803103	0.233823	0.173614	0.512737	0.225608	0.266738	0.138351	0	104796	104758	104849	26.8624	25.8628	27.4074	21.0085	20.2976	23.9566	47.7095	46.3921	2898.13	2621.98	1760.67	1215.61
1-qD-4525.1	Murine-specific	3.05153	0.576761	0	1.69689	0.320643	0	0	59695	14046434	2911	58163	14046407	16.8628	0.114729	0.140294	0.303824	0.53503	0.121481	0.059275	0.221362	0	62211	62196	62274	15.846	18.3128	20.3873	15.6039	18.342	21.508	17.0075	13.7167	5218.2	4961.48	1838.3	1430.27
2-qF1-2536.1	Murine-specific	3.07906	0.436528	0	1.2104	0.361339	0	0	95237	2404405	4101	97006	2404492	12.2555	0.206512	0.327352	0.325526	0.334394	0.173545	0.177825	0.138351	0	35167	35191	35235	22.6719	29.8659	31.0208	26.2166	25.5653	27.9933	46.0332	49.5099	3836.07	3699.74	2225.44	1727.11
17-qA3.3-352.1	Murine-specific	3.59831	0.315703	0	2.36491	0.241101	0	0	135674	4756841	1908	1019508	4756844	8.80511	0.103256	0.280588	0.282122	0.490444	0.242963	0.296375	0.249032	0	135794	135759	135839	16.7157	17.9046	19.0631	15.3482	12.1059	13.7479	21.722	25.8594	558.043	483.814	400.352	300.842
5-qG2-950.1	Murine-specific	2.29497	3.90555	0	0.956459	1.69443	0	0	0	5010878	9517	0	5010871	11.3545	0.596591	3.36705	0.238719	5.77386	0.260317	1.15586	0.276702	0	0	0	12	14.8378	14.7717	17.4386	16.8387	16.7955	19.3271	12.0499	10.5494	920.419	893.615	289.751	192.359
15-qD3-14639.1	Murine-specific	5.17317	0.73143	0	2.60467	0.528443	0	0	0	18269167	11470	0	17160411	12.5217	0.183566	0.163676	0.282122	0.378979	0.295026	0.148187	0.359713	0	35886	35964	36060	12.7578	15.2165	15.0861	12.1605	12.5283	13.6123	20.7507	18.8568	18975.4	17602.1	12457.3	8718.71
pi-1700016M24Rik.1	Mouse-specific	7.48971	0.445986	0	2.7862	0.530291	0	0	0	1582349	11087	0	1582369	13.3305	0.183566	0.233823	0.282122	0.356686	0.225608	0.385288	0.332042	0	35503	35581	35677	49.1526	52.7688	60.0033	62.0525	69.8718	73.9627	50.205	50.4433	168.264	149.807	410.538	298.175
13-qA3.1-355.1	Mouse-specific	0.608531	1.15571	0	0.314495	0.370582	0	320	310	2502587	4770	1795	2502618	1.60744	0.0917832	0.748234	0.0868068	1.51592	0.190899	0.35565	0.0553404	0	0	0	58748	5.62852	5.56221	6.22285	5.30202	5.38524	5.65856	1.33962	1.32444	421.239	375.246	64.7639	33.9386
4-qB3-639.1	Mouse-specific	2.92655	2.07195	0	1.60785	0.926751	0	0	0	5293229	5310	0	5293238	7.06456	0.390079	1.70691	0.368929	3.18788	0.312381	0.740938	0.276702	0	0	0	22183	2.93135	4.33626	4.40493	3.87979	3.82676	3.93372	3.70835	4.28135	1014.65	924.611	561.264	393.688
15-qE1-1119.1	Mouse-specific	3.57822	7.18556	0	1.91403	2.42509	0	0	0	17310960	7079	0	17310970	34.2887	2.24869	3.92823	0.434034	12.5732	0.34709	1.68934	0.276702	0	0	0	0	2.64085	2.53362	2.97849	2.48731	2.65816	2.57239	1.03314	0.95201	1531.75	1442.71	508.889	347.992
13-qA5-464.1	Mouse-specific	1.73332	0.25499	0	1.39781	0.236778	0	0	126944	68857	39953	127969	68877	8.77439	0.0803103	0.467646	0.303824	0.780251	0.295026	0.177825	0.276702	0	130156	128109	130262	2.31855	3.54168	3.08921	2.51064	2.54068	2.61047	3.13507	3.96424	579.33	529.959	238.064	173.935
10-qC1-1527.1	Mouse-specific	2.36268	0.437922	0	0.586297	0.194859	0	0	0	25507875	34258	92433	25507868	10.9961	0.137675	0.420881	0.412332	0.445858	0.295026	0.207462	0.0830106	0	93619	93604	93629	3.95969	4.94665	5.14825	3.94902	4.18342	5.06478	2.71103	2.51149	2229.24	1932.56	673.586	431.869
pi-Arhgap20.1	Mouse-specific	0.108626	1.38989	0	0.131742	0.618453	0	659623	129	15810271	1293	145	15810292	4.45375	1.41117	7.9266	0.13021	9.00633	0.0867725	2.63774	0.249032	243	7	3	129	13.9546	15.4615	15.46	13.4391	12.845	12.4118	17.8516	13.3939	903.513	914.261	66.8286	11.3937
8-qA2-343.1	Mouse-specific	1.62917	1.85827	0	0.962338	0.74054	0	0	0	10389608	10224	0	10389608	7.89388	0.286822	1.1925	0.217017	2.45222	0.260317	0.533475	0.110681	0	91	0	121209	12.633	14.6372	17.2622	14.8113	12.6359	16.0289	9.89556	9.04907	585.448	539.932	304.204	224.48
4-qD2.2-349.1	Mouse-specific	3.2479	2.09494	0	1.00869	0.971771	0	0	0	65579835	6577	6033	65579808	7.37172	0.137675	1.54323	0.173614	2.85349	0.15619	0.622387	0.166021	0	0	0	8148	8.65909	8.7118	8.95931	7.95388	7.53523	8.5654	3.87607	3.42967	448.39	435.891	114.731	75.6346
1-qC1.3-637.1	Mouse-specific	1.49155	1.51461	0	0.341774	0.589474	0	0	0	25585529	28379	1207402	25585523	2.20128	1.87008	1.59	0.173614	1.76114	0.225608	0.740938	0.166021	0	0	0	404342	6.40882	6.46809	6.08257	4.90823	4.26977	4.53993	4.67437	4.85756	1147.98	1005.09	282.938	200.359
8-qA4-155.1	Mouse-specific	2.70708	1.97521	0	0.434372	0.731297	0	0	0	18944327	4811	110623	18944333	7.10552	0.114729	0.631322	0.368929	1.69426	0.416508	0.414925	0.110681	0	10438	0	112621	21.424	25.6735	32.4313	28.8532	26.2496	27.8461	6.73349	6.4822	194.474	178.378	41.3636	25.6964
14-qA3-3095.1	Mouse-specific	3.26726	0.100624	0	0.685877	0.128257	0	0	67068	7226711	23344	425734	7226745	5.30354	0.252404	0.140294	0.26042	0.133757	0.0867725	0.0296375	0.0276702	0	67860	67928	68219	17.3063	21.1053	22.4021	16.5031	16.053	18.4265	19.5087	23.1848	4848.44	4395.25	3478.12	2777.75
3-qA2-617.1	Mouse-specific	1.34277	3.2185	0	0.903119	0.925529	0	0	0	1582307	30868	0	1582327	5.67213	0.0688374	1.54323	0.412332	3.09871	0.416508	0.681663	0.0553404	0	0	0	448160	1.88149	2.23278	1.36014	0.971331	1.14833	1.03574	1.29517	1.61695	677.037	581.278	60.9097	16.1208
10-qB5.1-221.1	Mouse-specific	3.8304	3.52973	0	1.11193	1.13271	0	0	0	15810127	10697	0	15810148	11.4159	0.550699	1.56661	0.26042	4.12419	0.399153	0.681663	0.0830106	0	1	0	35	9.90814	9.61017	11.023	9.12607	8.37599	9.62384	5.45354	5.6449	246.676	226.193	194.842	142.057
17-qE1.1-7037.1	Mouse-specific	2.94216	1.05399	0	0.971873	0.502537	0	0	0	58564286	2267	105284	58564280	17.4259	0.0803103	0.280588	0.303824	0.512737	0.138836	0.35565	0.193691	0	28371	28308	83051	7.44158	9.34901	9.21986	7.17605	7.85553	8.94766	11.0359	10.8587	10486.6	9562.55	6466.62	4830.43
14-qA3-284.1	Mouse-specific	3.573	0.204828	0	1.03486	0.119638	0	0	55705	32351675	11709	55312	32351664	2.95893	0.0917832	0.116912	0.26042	0.468151	0.190899	0.148187	0.193691	0	56764	56438	56995	9.17139	10.4723	10.5959	9.38923	8.4596	8.47863	7.10633	9.36533	442.344	421.929	223.06	175.147
8-qA4-332.1	Mouse-specific	2.05024	2.11327	0	0.515103	0.818853	0	0	0	18944205	2503	100070	18944211	6.38882	0.206512	1.02882	0.434034	1.85031	0.260317	0.4742	0.332042	0	0	0	102068	6.52112	7.49586	9.48811	7.27344	7.4638	8.04534	3.63216	2.98289	470.147	436.915	146.734	107.27
5-qG2-2301.1	Mouse-specific	1.6567	2.40258	0	0.620673	0.824404	0	0	0	13335238	10788	0	13335211	18.2962	0.814576	3.08646	0.173614	7.15602	0.190899	1.03731	0.193691	0	0	0	0	12.4954	14.0697	17.0811	13.8008	15.1384	16.6111	9.07055	8.65297	2990.48	2850.49	858.38	589.926
14-qC1-1010.1	Mouse-specific	1.96693	0.041605	0	0.142501	0.022209	0	0	290627	18136452	4796	290131	18136448	2.61082	0.298295	0.0935292	0.0651051	0.0891716	0.121481	0	0.166021	0	292040	292062	292082	7.1622	7.17855	8.85519	5.82561	5.66478	7.92036	8.75338	9.61134	1148.2	982.723	601.458	430.414
17-qC-59.1	Mouse-specific	0.105669	0.01334	0	0.19706	0.012341	0	67	55378	3310354	5003	534	3310364	0.368586	0.35566	0.280588	0.195315	0.267515	0.277672	0.11855	0.249032	900	47524	47520	55406	18.4188	17.6977	22.9909	19.5937	21.2559	23.7519	6.90894	6.19222	79.9325	82.3697	245.153	214.419
10-qC2-545.1	Mouse-specific	1.35096	4.27997	0	0.62777	1.61488	0	0	0	909671	236	0	909731	9.4399	2.21427	2.54867	0.282122	4.28024	0.34709	1.24477	0.221362	0	0	0	3	32.7282	38.1774	37.9943	35.2481	30.9046	32.121	36.918	36.9253	1585.98	1371.77	546.054	394.536
8-qC5-2209.1	Mouse-specific	2.50996	2.59437	0	2.05164	1.05871	0	0	0	10139548	1161	0	10139521	11.2214	0.43597	3.48396	0.195315	6.86621	0.34709	1.33369	0.166021	0	0	0	0	8.19682	10.753	9.57596	8.2685	7.65317	7.93753	16.6045	16.7506	3088.01	2799.39	2569.56	2014.74
pi-Wdfy3.1	Mouse-specific	0	0	0	0.0285002	0.0369982	0	45145	44718	1625468	247	399815	1625494	0.081908	1.42264	0.748234	0.173614	0.401272	0.0867725	0.296375	0.0830106	143591	723	46156	404089	7.82086	8.40731	8.63679	8.21133	8.80321	9.06607	12.2361	11.3111	826.512	729.414	297.46	251.752
18-qE1-1295.1	Mouse-specific	2.69521	0.611697	0	1.84638	0.459993	0	0	22145	65579737	20117	339331	65579710	22.1561	0.298295	0.561175	0.13021	1.13694	0.173545	0.207462	0.193691	0	21623	0	22156	14.0603	17.3082	19.6627	15.2869	14.7099	17.8598	11.6536	10.5758	1371.02	1323.95	1002.77	821.799
14-qA3-2286.1	Mouse-specific	3.54547	0.327047	0	0.634981	0.202878	0	0	115716	586214	9692	115323	586231	3.44014	0.172093	0.163676	0.303824	0.267515	0.0867725	0.326012	0.193691	0	116775	116449	117006	3.0293	3.95256	3.96972	2.95251	2.92012	3.66065	0.97564	1.44593	3219.28	2959.22	513.638	349.81
10-qC1-117.1	Mouse-specific	9.65371	2.28176	0	2.46217	0.777539	0	0	0	4950867	1756	0	4950860	15.368	0.0803103	0.397499	0.325526	0.579615	0.295026	0.266738	0.249032	0	45116	45118	45090	3.86732	4.92788	4.16768	3.70291	3.90529	3.44624	3.9208	4.7534	150.453	130.509	139.026	112.24
13-qA5-208.1	Mouse-specific	1.46402	0.501915	0	0.32636	0.18067	0	0	195715	15385380	16378	193776	15385374	3.92135	0.103256	0.374117	0.325526	0.579615	0.312381	0.2371	0.0830106	0	196705	54110	196780	1.58813	1.86213	1.73515	1.51832	1.35259	1.50764	1.78401	2.08269	293.303	275.033	252.38	217.692
14-qC1-1261.1	Mouse-specific	2.32398	0.103111	0	0.320599	0	0	0	427510	4245180	3659	427014	4245215	1.93508	0.0344187	0.0935292	0.0651051	0.0891716	0.173545	0.11855	0.110681	0	405535	405546	405605	6.59673	7.61791	7.84959	5.41484	5.44374	7.03114	14.1106	15.3351	1423.18	1247.68	977.721	776.225
10-qB5.1-5404.1	Mouse-specific	4.38609	3.92217	0	1.27927	1.14072	0	0	0	4045893	10853	0	4045912	11.4774	0.458916	1.56661	0.26042	4.16877	0.416508	0.7113	0.0830106	0	0	0	0	14.8716	14.7035	15.9829	12.2703	12.3263	13.9435	10.9266	10.1284	7104.58	6689.9	2827.24	1738.63
13-qA3.1-213.1	Mouse-specific	1.62917	2.47076	0	0.486603	1.02603	0	0	0	2266793	10109	0	2266831	7.87341	0.642482	4.25558	0.26042	8.85028	0.173545	2.1339	0.221362	0	0	0	0	12.1738	10.3132	9.32897	9.04804	6.81139	8.97733	4.37944	3.8423	620.418	613.622	95.2532	45.8171
7-qB5-6255.1	Mouse-specific	4.97232	0.597564	0	1.82742	0.361339	0	0	881659	8386191	17393	1021529	8386189	4.88376	0.0688374	0.187058	0.26042	0.312101	0.242963	0.207462	0.166021	0	881643	881636	881698	21.4497	24.7115	23.6729	20.7423	20.4621	22.2316	33.2832	35.6858	5895.68	5337	2759.8	2102.86
pi-Cdc42ep3.1	Mouse-specific	1.62696	5.17183	0	0.746426	1.88618	0	0	0	161528	281	0	112298	9.51157	1.25055	5.56499	0.303824	8.20379	0.260317	2.40064	0.359713	0	0	0	0	61.1401	59.3246	63.9371	64.7578	55.9148	62.8906	13.9465	12.7505	224.34	249.104	20.2344	11.5149
13-qA5-703.1	Mouse-specific	3.3491	0.286043	0	0.825937	0.242949	0	0	167227	8523644	34225	167225	8523678	6.5424	0.0573645	0.584558	0.282122	0.735666	0.225608	0.177825	0.304372	0	23450	0	23457	8.62161	11.7375	10.9512	8.95492	7.80543	8.6539	11.8393	14.265	1138.35	977.44	462.019	360.113
11-qE1-3997.1	Mouse-specific	1.78541	0.309333	0	1.29102	0.236778	0	0	45592	5398001	2114	71249	5398035	15.9311	0.401552	0.30397	0.195315	0.624201	0.104127	0.177825	0.0830106	0	45886	0	45958	5.40234	7.47197	7.4239	7.25074	7.27003	8.21891	10.0592	9.90209	3874.99	3441.85	2028.81	1372.7
9-qC-10667.1	Eutherian	5.7467	3.02533	0	2.83245	1.39045	0	0	0	19738626	18501	0	19738636	18.5214	0.263877	2.15117	0.282122	4.63692	0.277672	1.09659	0.193691	0	0	0	24	11.6423	15.554	13.6848	10.4538	10.9383	12.5445	20.433	21.0747	15831.8	14401.7	8668.11	6260.83
18-qE1-36451.1	Eutherian	2.84176	0.672109	0	1.84284	0.485274	0	0	22272	1358326	20244	339458	1358365	22.1356	0.27535	0.584558	0.151912	1.18152	0.208254	0.207462	0.249032	0	21750	0	22283	11.2622	13.7742	13.3538	9.42369	10.6801	12.2108	14.9419	15.4404	49849.9	45207.5	16471	11895
7-qD1-19431.1	Eutherian	5.52131	0.950091	0	2.01372	0.291664	0	0	0	25370992	13315	509431	25370985	6.93146	0.126202	0.210441	0.173614	0.468151	0.173545	0.177825	0.276702	0	72752	72709	72725	13.3953	15.6365	16.2361	12.0052	12.9117	15.1294	13.123	11.8841	24416.9	22446.9	12012.6	9635.05
17-qA3.3-27363.1	Eutherian	5.78688	3.22876	0	3.28688	1.05316	0	0	0	2404561	1954	0	2404648	20.3234	1.27349	0.631322	0.347227	0.936302	0.277672	0.2371	0.249032	0	60715	58	60744	8.84348	10.5777	10.7984	9.07212	11.3673	11.4907	24.8725	23.0878	35155.9	34616.9	39388.4	30738.1
7-qD2-11976.1	Eutherian	4.55794	0.508586	0	1.97934	0.299683	0	0	0	6121065	83675	0	6121097	8.66177	0.149148	0.233823	0.13021	0.53503	0.242963	0.177825	0.332042	0	75258	75470	75516	17.3008	20.869	21.9314	17.8393	18.1383	20.5691	17.1405	18.1963	18477.3	17190	6561.73	4972.01
5-qG3-23659.1	Eutherian	4.73871	1.44145	0	2.05996	0.514253	0	0	0	18132803	12380	0	18132809	5.94857	0.309768	0.724851	0.368929	1.00318	0.277672	0.177825	0.332042	0	0	0	81972	8.35959	9.59011	9.3595	6.62719	8.10214	9.08437	26.1604	26.1273	32339.6	29092.4	28344.2	23404.3
7-qD1-16444.1	Eutherian	4.49993	0.259172	0	1.94729	0.328662	0	0	451653	17765669	35538	0	17765655	11.9279	0.160621	0.280588	0.26042	0.312101	0.15619	0.207462	0.221362	0	227692	227653	451729	5.08325	6.06998	5.11032	3.93547	4.35736	4.7199	8.44524	8.58982	19566.6	17759.6	9668.75	7414.86
7-qD2-24830.1	Eutherian	4.78632	0.484201	0	2.0054	0.402034	0	0	0	3730215	83800	0	3730225	8.56962	0.137675	0.257205	0.173614	0.512737	0.277672	0.207462	0.332042	0	75133	75345	75391	14.5709	17.9265	17.9185	13.2038	15.1681	17.5647	19.9644	18.397	33578.1	30855	19040.3	14730.2
5-qF-14508.1	Eutherian	3.56556	0.771038	0	1.54619	0.308927	0	0	0	2454855	677	320847	2454874	11.1292	0.103256	0.444264	0.303824	0.780251	0.329735	0.35565	0.304372	0	4707	1	4743	12.2001	13.1585	13.7797	11.3111	13.336	14.674	16.7766	14.2734	18766.2	17753.6	8702.45	6445.91
15-qD1-17920.1	Eutherian	3.77386	0.861115	0	2.26168	0.310775	0	0	30868	5010167	5513	30723	5010106	13.2793	0.0688374	0.187058	0.195315	0.668787	0.277672	0.148187	0.276702	0	31473	31581	39843	14.3308	17.2101	15.9682	11.9236	13.975	15.1831	23.1518	21.2739	26542.6	23597.6	16032.5	11675.6
5-qF-14224.1	Eutherian	3.66972	0.807067	0	1.51059	0.322492	0	0	0	23953339	635	320805	23953331	11.0781	0.126202	0.374117	0.303824	0.802544	0.34709	0.35565	0.332042	0	4749	0	4785	10.6412	10.5331	12.1991	9.81012	10.3562	11.3756	16.7989	14.2031	17959.3	16206.2	9378.17	6814.51
9-qA5.3-24188.1	Eutherian	0.662105	0.304057	0	0.449786	0.258363	0	637756	239592	1358227	1955	252072	1358266	9.50133	0.0573645	0.280588	0.325526	0.490444	0.225608	0.2371	0.304372	0	36538	36500	251429	7.79295	10.3531	9.22317	6.67387	7.7223	8.6057	9.05603	8.89411	31579.7	29162.6	11698.2	8517.74
6-qF3-8009.1	Eutherian	2.77183	0.661859	0	1.83218	0.493293	0	0	235336	6879873	23419	0	6879889	28.8009	0.114729	0.350735	0.195315	1.5828	0.208254	0.266738	0.249032	0	26637	0	342727	25.4684	28.7928	28.0637	25.5216	23.817	26.6514	30.4865	30.0458	10959	10306.8	7247.16	5747.87
17-qA3.3-26735.1	Eutherian	6.01674	3.073	0	3.44114	1.10742	0	0	0	8842233	2122	0	8842142	20.3849	1.29644	0.654704	0.303824	0.891716	0.277672	0.266738	0.221362	0	60547	0	60576	11.2754	11.7988	12.0281	10.7714	11.9027	11.9996	37.3573	34.1995	30924.5	30257.7	57073.4	42701.1
12-qE-7089.1	Eutherian	1.96244	0.777407	0	0.337119	0.249119	0	0	3952	233103	3673	159700	233083	7.02361	0.160621	0.163676	0.151912	0.423565	0.208254	0.2371	0.249032	0	6662	6652	154298	12.351	12.8794	13.9188	10.6576	10.2133	11.7838	21.5365	19.2419	11329.8	10450.6	9593.52	7245.65
2-qE1-35981.1	Eutherian	3.1051	0.733921	0	1.32906	0.415599	0	0	80951	449106	38558	1014219	449127	2.46748	0.0917832	0.210441	0.282122	0.356686	0.225608	0.177825	0.138351	0	58518	58514	81265	6.98829	9.22278	8.26625	6.03337	7.54172	7.80432	7.13801	7.48331	49238.1	46109.7	22191.4	15853.6
4-qD3-2082.1	Eutherian	4.73945	4.00587	0	3.02584	1.3516	0	0	0	3583493	7126	0	3583491	13.4636	0.126202	0.91191	0.607648	1.2707	0.242963	0.296375	0.221362	0	72567	0	100454	77.9859	83.703	104.489	95.1472	101.6	113.417	83.5291	71.7612	3261.85	3123.31	1849.73	1298.88
4-qC5-17839.1	Eutherian	1.62174	0.136653	0	0.223232	0.069074	0	0	222542	8391034	11131	282214	8391034	5.24211	0.103256	0.0701469	0.195315	0.222929	0.173545	0.0889125	0.166021	0	97252	97266	224639	7.21609	9.94206	7.63353	5.45388	6.03916	6.55871	6.45074	7.68063	26714.8	23299.5	6859.74	4432.14
12-qE-23911.1	Eutherian	1.92822	0.751629	0	0.340668	0.291664	0	0	4051	6064125	3772	159601	6064159	6.98266	0.0803103	0.140294	0.173614	0.401272	0.208254	0.2371	0.221362	0	6761	6751	154397	13.4932	17.6169	15.7546	12.0383	12.929	14.3295	17.7836	18.5557	34241.5	30424.7	16580.5	12293.8
15-qE1-8387.1	Eutherian	3.89662	1.05817	0	1.8131	0.779386	0	0	0	1017628	15706	0	1017645	11.1497	0.550699	0.467646	0.368929	0.735666	0.260317	0.148187	0.193691	0	77813	0	130377	8.33185	8.6987	9.73321	7.82375	9.05277	9.99064	16.6632	14.6217	9710.61	9046.87	9253.94	6996.2
3-qA3-2052.1	Eutherian	2.61264	0.167706	0	1.29113	0.299683	0	0	162483	26580115	24598	806818	26580167	15.8594	0.0688374	0.163676	0.108509	0.579615	0.225608	0.207462	0.166021	0	66500	127762	164847	9.68941	11.28	11.1322	10.406	9.96601	10.3722	14.77	15.7926	2864.76	2732.97	1764.87	1494.03
