# Supplementary material for: A-MYB/TCFL5 regulatory architecture ensures the production of pachytene piRNAs in placental mammals
Source: RNA. 2023 Jan;29(1):30–43. doi: 10.1261/rna.079472.122 (PMC9808571; doi:10.1261/rna.079472.122)
Supplement: Supplemental Material [file supp_079472.122_Supplemental_Table_S2.xlsx]

## Sheet: Table S2
Table S2. Reciprocal cleavage events between piRNAs and piRNA precursor transcripts from pachytene piRNA genes.
Initiator piRNA source	Source locus synteny	Target locus	Target locus syntenty	Initiator piRNA coordinate	Initiator piRNA sequence	Target site coordinate (reversed)	Target site sequence (reversed)	Source reads	Multiplicity of source mapping	Target reads	Multiplicity of mapping of target locus
17-qE1.1-7037.1	Mouse-specific	12-qE-7089.1	Eutherian	chr17:66213641-66213671:+	TTGTTTGTTTGTTTGATTTGACCTGTCACT	chr12:98446157-98446197:-	TTGTTTGTTTGTTTGTTTGTTTGTTTTTTGTTTTTGTTTT	31	1	20	1
17-qE1.1-7037.1	Mouse-specific	12-qE-7089.1	Eutherian	chr17:66213641-66213671:+	TTGTTTGTTTGTTTGATTTGACCTGTCACC	chr12:98446157-98446197:-	TTGTTTGTTTGTTTGTTTGTTTGTTTTTTGTTTTTGTTTT	341	1	20	1
17-qE1.1-7037.1	Mouse-specific	12-qE-7089.1	Eutherian	chr17:66213641-66213672:+	TTGTTTGTTTGTTTGATTTGACCTGTCACCT	chr12:98446157-98446197:-	TTGTTTGTTTGTTTGTTTGTTTGTTTTTTGTTTTTGTTTT	35	1	20	1
7-qB5-6255.1	Mouse-specific	12-qE-7089.1	Eutherian	chr7:52909962-52909989:+	TTGTTTGGTTGGTTGTTTAGTCCTTGG	chr12:98446157-98446197:-	TTGTTTGTTTGTTTGTTTGTTTGTTTTTTGTTTTTGTTTT	36	1	20	1
7-qB5-6255.1	Mouse-specific	12-qE-7089.1	Eutherian	chr7:52909962-52909990:+	TTGTTTGGTTGGTTGTTTAGTCCTTGGG	chr12:98446157-98446197:-	TTGTTTGTTTGTTTGTTTGTTTGTTTTTTGTTTTTGTTTT	63	1	20	1
7-qB5-6255.1	Mouse-specific	12-qE-7089.1	Eutherian	chr7:52909962-52909991:+	TTGTTTGGTTGGTTGTTTAGTCCTTGGGA	chr12:98446157-98446197:-	TTGTTTGTTTGTTTGTTTGTTTGTTTTTTGTTTTTGTTTT	36	1	20	1
7-qB5-6255.1	Mouse-specific	12-qE-7089.1	Eutherian	chr7:52909962-52909991:+	TTGTTTGGTTGGTTGTTTAGTCCTTGGGT	chr12:98446157-98446197:-	TTGTTTGTTTGTTTGTTTGTTTGTTTTTTGTTTTTGTTTT	79	1	20	1
4-qC5-17839.1	Eutherian	3-qA2-617.1	Mouse-specific	chr4:94294523-94294552:-	TATTGGAGTGATGGCTCAGTGGTCTGCTT	chr3:20465523-20465563:+	GATTGGAGTGAAGAATCAGTGTTCACTGTAGCATTGTTTT	134	1	30	1
4-qC5-17839.1	Eutherian	3-qA2-617.1	Mouse-specific	chr4:94294524-94294552:-	TATTGGAGTGATGGCTCAGTGGTCTGCT	chr3:20465523-20465563:+	GATTGGAGTGAAGAATCAGTGTTCACTGTAGCATTGTTTT	71	1	30	1
4-qC5-17839.1	Eutherian	3-qA2-617.1	Mouse-specific	chr4:94294525-94294552:-	TATTGGAGTGATGGCTCAGTGGTCTGC	chr3:20465523-20465563:+	GATTGGAGTGAAGAATCAGTGTTCACTGTAGCATTGTTTT	37	1	30	1
4-qC5-17839.1	Eutherian	3-qA2-617.1	Mouse-specific	chr4:94294527-94294552:-	TATTGGAGTGATGGCTCAGTGGTCT	chr3:20465523-20465563:+	GATTGGAGTGAAGAATCAGTGTTCACTGTAGCATTGTTTT	345	1	30	1
4-qC5-17839.1	Eutherian	3-qA2-617.1	Mouse-specific	chr4:94294528-94294552:-	TATTGGAGTGATGGCTCAGTGGTC	chr3:20465523-20465563:+	GATTGGAGTGAAGAATCAGTGTTCACTGTAGCATTGTTTT	66	1	30	1
17-qA3.3-26735.1	Eutherian	17-qA3.3-27363.1	Eutherian	chr17:27338474-27338498:+	CAAAGACAAACTATGTTCATTCCT	chr17:27292171-27292211:+	TAAAGACAAACTAGGCTCATTCCTGCTTATGATTAAATCT	66	1	22	1
17-qA3.3-26735.1	Eutherian	17-qA3.3-27363.1	Eutherian	chr17:27338474-27338500:+	CAAAGACAAACTATGTTCATTCCTGC	chr17:27292171-27292211:+	TAAAGACAAACTAGGCTCATTCCTGCTTATGATTAAATCT	229	1	22	1
17-qA3.3-26735.1	Eutherian	17-qA3.3-27363.1	Eutherian	chr17:27338474-27338501:+	CAAAGACAAACTATGTTCATTCCTGCT	chr17:27292171-27292211:+	TAAAGACAAACTAGGCTCATTCCTGCTTATGATTAAATCT	394	1	22	1
17-qA3.3-26735.1	Eutherian	17-qA3.3-27363.1	Eutherian	chr17:27338474-27338502:+	CAAAGACAAACTATGTTCATTCCTGCTT	chr17:27292171-27292211:+	TAAAGACAAACTAGGCTCATTCCTGCTTATGATTAAATCT	137	1	22	1
17-qA3.3-26735.1	Eutherian	17-qA3.3-27363.1	Eutherian	chr17:27338474-27338503:+	CAAAGACAAACTATGTTCATTCCTGCTTA	chr17:27292171-27292211:+	TAAAGACAAACTAGGCTCATTCCTGCTTATGATTAAATCT	43	1	22	1
17-qE1.1-7037.1	Mouse-specific	9-qA1-178.1	Murine-specific	chr17:66215680-66215705:+	TGAGTCATTTCTGTTCCTGTGATCC	chr9:3185804-3185844:+	TGAGTCATTTCTGCTCCTGTAAGTAACCCCTCACCCATAT	50	1	43	1
17-qE1.1-7037.1	Mouse-specific	9-qA1-178.1	Murine-specific	chr17:66215680-66215708:+	TGAGTCATTTCTGTTCCTGTGATCCACC	chr9:3185804-3185844:+	TGAGTCATTTCTGCTCCTGTAAGTAACCCCTCACCCATAT	357	1	43	1
17-qE1.1-7037.1	Mouse-specific	9-qA1-178.1	Murine-specific	chr17:66215680-66215708:+	TGAGTCATTTCTGTTCCTGTGATCCACT	chr9:3185804-3185844:+	TGAGTCATTTCTGCTCCTGTAAGTAACCCCTCACCCATAT	51	1	43	1
17-qE1.1-7037.1	Mouse-specific	9-qA1-178.1	Murine-specific	chr17:66215680-66215709:+	TGAGTCATTTCTGTTCCTGTGATCCACCT	chr9:3185804-3185844:+	TGAGTCATTTCTGCTCCTGTAAGTAACCCCTCACCCATAT	846	1	43	1
17-qE1.1-7037.1	Mouse-specific	9-qA1-178.1	Murine-specific	chr17:66215680-66215710:+	TGAGTCATTTCTGTTCCTGTGATCCACCTT	chr9:3185804-3185844:+	TGAGTCATTTCTGCTCCTGTAAGTAACCCCTCACCCATAT	171	1	43	1
1-qD-4525.1	Murine-specific	6-qD1-2831.1	Murine-specific	chr1:92993960-92993990:-	AGTTTATTAAGGAAGAAAGCATCTCGGGGG	chr6:87990109-87990149:+	AGTTTATTAAGAAAGAAAAGGGCACTCCTCGGAGTGGAGG	261	1	44	1
1-qD-4525.1	Murine-specific	6-qD1-2831.1	Murine-specific	chr1:92993960-92993990:-	AGTTTATTAAGGAAGAAAGCATCTCGGGGT	chr6:87990109-87990149:+	AGTTTATTAAGAAAGAAAAGGGCACTCCTCGGAGTGGAGG	53	1	44	1
1-qD-4525.1	Murine-specific	6-qD1-2831.1	Murine-specific	chr1:92993961-92993990:-	AGTTTATTAAGGAAGAAAGCATCTCGGGG	chr6:87990109-87990149:+	AGTTTATTAAGAAAGAAAAGGGCACTCCTCGGAGTGGAGG	1180	1	44	1
1-qD-4525.1	Murine-specific	6-qD1-2831.1	Murine-specific	chr1:92993961-92993990:-	AGTTTATTAAGGAAGAAAGCATCTCGGGT	chr6:87990109-87990149:+	AGTTTATTAAGAAAGAAAAGGGCACTCCTCGGAGTGGAGG	54	1	44	1
1-qD-4525.1	Murine-specific	6-qD1-2831.1	Murine-specific	chr1:92993962-92993990:-	AGTTTATTAAGGAAGAAAGCATCTCGGG	chr6:87990109-87990149:+	AGTTTATTAAGAAAGAAAAGGGCACTCCTCGGAGTGGAGG	222	1	44	1
1-qD-4525.1	Murine-specific	6-qD1-2831.1	Murine-specific	chr1:92993963-92993990:-	AGTTTATTAAGGAAGAAAGCATCTCGG	chr6:87990109-87990149:+	AGTTTATTAAGAAAGAAAAGGGCACTCCTCGGAGTGGAGG	406	1	44	1
2-qF1-2536.1	Murine-specific	14-qA3-19970.1	Murine-specific	chr2:127703524-127703552:+	CTTTGAATCAAAATGTAAAACTCTTGGC	chr14:24115623-24115663:-	CTTTGAATCAAGATGTAGACTCTTGGTTCTTCCAGCACCA	87	1	14	1
2-qF1-2536.1	Murine-specific	14-qA3-19970.1	Murine-specific	chr2:127703524-127703553:+	CTTTGAATCAAAATGTAAAACTCTTGGCT	chr14:24115623-24115663:-	CTTTGAATCAAGATGTAGACTCTTGGTTCTTCCAGCACCA	57	1	14	1
2-qF1-2536.1	Murine-specific	14-qA3-19970.1	Murine-specific	chr2:127703524-127703554:+	CTTTGAATCAAAATGTAAAACTCTTGGCTC	chr14:24115623-24115663:-	CTTTGAATCAAGATGTAGACTCTTGGTTCTTCCAGCACCA	1249	1	14	1
2-qF1-2536.1	Murine-specific	14-qA3-19970.1	Murine-specific	chr2:127703524-127703555:+	CTTTGAATCAAAATGTAAAACTCTTGGCTCC	chr14:24115623-24115663:-	CTTTGAATCAAGATGTAGACTCTTGGTTCTTCCAGCACCA	5021	1	14	1
2-qF1-2536.1	Murine-specific	14-qA3-19970.1	Murine-specific	chr2:127703524-127703556:+	CTTTGAATCAAAATGTAAAACTCTTGGCTCCT	chr14:24115623-24115663:-	CTTTGAATCAAGATGTAGACTCTTGGTTCTTCCAGCACCA	31	1	14	1
7-qD1-19431.1	Eutherian	17-qA3.3-27363.1	Eutherian	chr7:73119933-73119958:+	TAAAGAAAGAGAAGTGTCTGCTGTA	chr17:27320835-27320875:+	CAAAGAAATAGCAGTGGCTGCGTCCTTGGTCCCCAGGGGA	37	1	32	1
7-qD1-19431.1	Eutherian	17-qA3.3-27363.1	Eutherian	chr7:73119933-73119960:+	TAAAGAAAGAGAAGTGTCTGCTGTAGA	chr17:27320835-27320875:+	CAAAGAAATAGCAGTGGCTGCGTCCTTGGTCCCCAGGGGA	155	1	32	1
7-qD1-19431.1	Eutherian	17-qA3.3-27363.1	Eutherian	chr7:73119933-73119961:+	TAAAGAAAGAGAAGTGTCTGCTGTAGAA	chr17:27320835-27320875:+	CAAAGAAATAGCAGTGGCTGCGTCCTTGGTCCCCAGGGGA	32	1	32	1
10-qB4-6488.1	Murine-specific	5-qG3-23659.1	Eutherian	chr10:62676286-62676316:+	TTTAATCCCAGTTCTCGGGAGTTTGAGAGC	chr5:149826621-149826661:+	TTTAATCTCAGCACTTGGGAGGCAGAGGCAGGCAGATTTC	40	1	15	1
10-qB4-6488.1	Murine-specific	5-qG3-23659.1	Eutherian	chr10:62688647-62688673:+	TTTAATCTTAGCACTGGGGAGACTGA	chr5:149826621-149826661:+	TTTAATCTCAGCACTTGGGAGGCAGAGGCAGGCAGATTTC	42	1	15	1
10-qB4-6488.1	Murine-specific	5-qG3-23659.1	Eutherian	chr10:62688647-62688675:+	TTTAATCTTAGCACTGGGGAGACTGAGT	chr5:149826621-149826661:+	TTTAATCTCAGCACTTGGGAGGCAGAGGCAGGCAGATTTC	47	1	15	1
10-qB4-6488.1	Murine-specific	5-qG3-23659.1	Eutherian	chr10:62688647-62688675:+	TTTAATCTTAGCACTGGGGAGACTGAGA	chr5:149826621-149826661:+	TTTAATCTCAGCACTTGGGAGGCAGAGGCAGGCAGATTTC	75	1	15	1
10-qB4-6488.1	Murine-specific	5-qG3-23659.1	Eutherian	chr10:62688647-62688676:+	TTTAATCTTAGCACTGGGGAGACTGAGAT	chr5:149826621-149826661:+	TTTAATCTCAGCACTTGGGAGGCAGAGGCAGGCAGATTTC	181	1	15	1
15-qD3-14639.1	Murine-specific	5-qG3-23659.1	Eutherian	chr15:74657262-74657288:+	TTTAATCACAGCACTAGGGAAACAGA	chr5:149826621-149826661:+	TTTAATCTCAGCACTTGGGAGGCAGAGGCAGGCAGATTTC	65	2	15	1
15-qD3-14639.1	Murine-specific	5-qG3-23659.1	Eutherian	chr15:74657262-74657289:+	TTTAATCACAGCACTAGGGAAACAGAA	chr5:149826621-149826661:+	TTTAATCTCAGCACTTGGGAGGCAGAGGCAGGCAGATTTC	149	1	15	1
15-qD3-14639.1	Murine-specific	5-qG3-23659.1	Eutherian	chr15:74657262-74657290:+	TTTAATCACAGCACTAGGGAAACAGAAG	chr5:149826621-149826661:+	TTTAATCTCAGCACTTGGGAGGCAGAGGCAGGCAGATTTC	378	1	15	1
15-qD3-14639.1	Murine-specific	5-qG3-23659.1	Eutherian	chr15:74657262-74657291:+	TTTAATCACAGCACTAGGGAAACAGAAGC	chr5:149826621-149826661:+	TTTAATCTCAGCACTTGGGAGGCAGAGGCAGGCAGATTTC	1836	1	15	1
15-qD3-14639.1	Murine-specific	5-qG3-23659.1	Eutherian	chr15:74657262-74657291:+	TTTAATCACAGCACTAGGGAAACAGAAGT	chr5:149826621-149826661:+	TTTAATCTCAGCACTTGGGAGGCAGAGGCAGGCAGATTTC	81	1	15	1
15-qD3-14639.1	Murine-specific	5-qG3-23659.1	Eutherian	chr15:74657262-74657292:+	TTTAATCACAGCACTAGGGAAACAGAAGCT	chr5:149826621-149826661:+	TTTAATCTCAGCACTTGGGAGGCAGAGGCAGGCAGATTTC	1523	1	15	1
15-qD3-14639.1	Murine-specific	5-qG3-23659.1	Eutherian	chr15:74657262-74657293:+	TTTAATCACAGCACTAGGGAAACAGAAGCTT	chr5:149826621-149826661:+	TTTAATCTCAGCACTTGGGAGGCAGAGGCAGGCAGATTTC	195	1	15	1
5-qF-14224.1	Eutherian	5-qG3-23659.1	Eutherian	chr5:113343582-113343610:+	TTTAATCCCAGCTCTTGGGAGGCGGAGG	chr5:149826621-149826661:+	TTTAATCTCAGCACTTGGGAGGCAGAGGCAGGCAGATTTC	253	4	15	1
5-qF-14224.1	Eutherian	5-qG3-23659.1	Eutherian	chr5:113343582-113343611:+	TTTAATCCCAGCTCTTGGGAGGCGGAGGC	chr5:149826621-149826661:+	TTTAATCTCAGCACTTGGGAGGCAGAGGCAGGCAGATTTC	174	4	15	1
9-qA5.3-1495.1	Murine-specific	5-qG3-23659.1	Eutherian	chr9:54249982-54250008:+	TTTAATCTCAGCACCGTGGAGGCAGA	chr5:149826621-149826661:+	TTTAATCTCAGCACTTGGGAGGCAGAGGCAGGCAGATTTC	47	1	15	1
9-qA5.3-1495.1	Murine-specific	5-qG3-23659.1	Eutherian	chr9:54249982-54250011:+	TTTAATCTCAGCACCGTGGAGGCAGAGGC	chr5:149826621-149826661:+	TTTAATCTCAGCACTTGGGAGGCAGAGGCAGGCAGATTTC	60	1	15	1
9-qA5.3-1495.1	Murine-specific	5-qG3-23659.1	Eutherian	chr9:54249982-54250012:+	TTTAATCTCAGCACCGTGGAGGCAGAGGCT	chr5:149826621-149826661:+	TTTAATCTCAGCACTTGGGAGGCAGAGGCAGGCAGATTTC	41	1	15	1
10-qB4-6488.1	Murine-specific	5-qG2-950.1	Murine-specific	chr10:62703613-62703642:+	TGGGATTAAAGGAATGGACCACCATCGCC	chr5:136934576-136934616:-	TGGGATTACAAGAATGCACCACCACACCTGGTTTCTGAAG	33	1	76	1
14-qA3-3095.1	Mouse-specific	5-qG2-950.1	Murine-specific	chr14:19638143-19638174:-	TGGGATTAAAAACATGAACCACCATGGATGT	chr5:136934576-136934616:-	TGGGATTACAAGAATGCACCACCACACCTGGTTTCTGAAG	90	1	76	1
14-qA3-3095.1	Mouse-specific	5-qG2-950.1	Murine-specific	chr14:19638144-19638174:-	TGGGATTAAAAACATGAACCACCATGGATG	chr5:136934576-136934616:-	TGGGATTACAAGAATGCACCACCACACCTGGTTTCTGAAG	138	1	76	1
14-qA3-3095.1	Mouse-specific	5-qG2-950.1	Murine-specific	chr14:19638145-19638174:-	TGGGATTAAAAACATGAACCACCATGGAT	chr5:136934576-136934616:-	TGGGATTACAAGAATGCACCACCACACCTGGTTTCTGAAG	335	1	76	1
14-qA3-3095.1	Mouse-specific	5-qG2-950.1	Murine-specific	chr14:19638146-19638174:-	TGGGATTAAAAACATGAACCACCATGGA	chr5:136934576-136934616:-	TGGGATTACAAGAATGCACCACCACACCTGGTTTCTGAAG	42	1	76	1
14-qA3-3095.1	Mouse-specific	5-qG2-950.1	Murine-specific	chr14:19638147-19638174:-	TGGGATTAAAAACATGAACCACCATGG	chr5:136934576-136934616:-	TGGGATTACAAGAATGCACCACCACACCTGGTTTCTGAAG	45	1	76	1
14-qA3-3095.1	Mouse-specific	5-qG2-950.1	Murine-specific	chr14:19638150-19638174:-	TGGGATTAAAAACATGAACCACCA	chr5:136934576-136934616:-	TGGGATTACAAGAATGCACCACCACACCTGGTTTCTGAAG	88	1	76	1
14-qC1-1261.1	Mouse-specific	5-qG2-950.1	Murine-specific	chr14:44774858-44774890:-	TGGGATTAAACGCATGAACCACCATGCATGGA	chr5:136934576-136934616:-	TGGGATTACAAGAATGCACCACCACACCTGGTTTCTGAAG	34	1	76	1
14-qC1-1261.1	Mouse-specific	5-qG2-950.1	Murine-specific	chr14:44774861-44774890:-	TGGGATTAAACGCATGAACCACCATGCAT	chr5:136934576-136934616:-	TGGGATTACAAGAATGCACCACCACACCTGGTTTCTGAAG	45	1	76	1
17-qA3.3-26735.1	Eutherian	5-qG2-950.1	Murine-specific	chr17:27364003-27364031:+	TGGGATTACAGAATTGTACCATCACACC	chr5:136934576-136934616:-	TGGGATTACAAGAATGCACCACCACACCTGGTTTCTGAAG	272	1	76	1
17-qA3.3-26735.1	Eutherian	5-qG2-950.1	Murine-specific	chr17:27364003-27364032:+	TGGGATTACAGAATTGTACCATCACACCC	chr5:136934576-136934616:-	TGGGATTACAAGAATGCACCACCACACCTGGTTTCTGAAG	179	1	76	1
17-qA3.3-26735.1	Eutherian	5-qG2-950.1	Murine-specific	chr17:27364003-27364033:+	TGGGATTACAGAATTGTACCATCACACCCT	chr5:136934576-136934616:-	TGGGATTACAAGAATGCACCACCACACCTGGTTTCTGAAG	34	1	76	1
17-qA3.3-26735.1	Eutherian	5-qG2-950.1	Murine-specific	chr17:27364003-27364033:+	TGGGATTACAGAATTGTACCATCACACCCG	chr5:136934576-136934616:-	TGGGATTACAAGAATGCACCACCACACCTGGTTTCTGAAG	598	1	76	1
17-qA3.3-26735.1	Eutherian	5-qG2-950.1	Murine-specific	chr17:27364003-27364034:+	TGGGATTACAGAATTGTACCATCACACCCGT	chr5:136934576-136934616:-	TGGGATTACAAGAATGCACCACCACACCTGGTTTCTGAAG	231	1	76	1
17-qA3.3-26735.1	Eutherian	5-qG2-950.1	Murine-specific	chr17:27364003-27364034:+	TGGGATTACAGAATTGTACCATCACACCCGA	chr5:136934576-136934616:-	TGGGATTACAAGAATGCACCACCACACCTGGTTTCTGAAG	87	1	76	1
17-qA3.3-26735.1	Eutherian	5-qG2-950.1	Murine-specific	chr17:27364003-27364035:+	TGGGATTACAGAATTGTACCATCACACCCGAC	chr5:136934576-136934616:-	TGGGATTACAAGAATGCACCACCACACCTGGTTTCTGAAG	40	1	76	1
6-qC3-6258.1	Murine-specific	5-qG2-950.1	Murine-specific	chr6:81898600-81898631:-	TGGGATTACAGGTGTGCACAACTTTCCTGCT	chr5:136934576-136934616:-	TGGGATTACAAGAATGCACCACCACACCTGGTTTCTGAAG	126	1	76	1
6-qC3-6258.1	Murine-specific	5-qG2-950.1	Murine-specific	chr6:81898601-81898631:-	TGGGATTACAGGTGTGCACAACTTTCCTGC	chr5:136934576-136934616:-	TGGGATTACAAGAATGCACCACCACACCTGGTTTCTGAAG	36	1	76	1
6-qC3-6258.1	Murine-specific	5-qG2-950.1	Murine-specific	chr6:81898603-81898631:-	TGGGATTACAGGTGTGCACAACTTTCCT	chr5:136934576-136934616:-	TGGGATTACAAGAATGCACCACCACACCTGGTTTCTGAAG	108	1	76	1
6-qC3-6258.1	Murine-specific	5-qG2-950.1	Murine-specific	chr6:81898606-81898631:-	TGGGATTACAGGTGTGCACAACTTT	chr5:136934576-136934616:-	TGGGATTACAAGAATGCACCACCACACCTGGTTTCTGAAG	46	1	76	1
2-qE1-35981.1	Eutherian	6-qF3-28913.1	Murine-specific	chr2:92573033-92573059:+	TGTAAAATGGGGATAATAATAAGCCT	chr6:127800641-127800681:-	TGTAAAATGAGGATAATAAGGCCTGCCTGCCTGTCTTACA	247	1	137	1
2-qE1-35981.1	Eutherian	6-qF3-28913.1	Murine-specific	chr2:92573033-92573062:+	TGTAAAATGGGGATAATAATAAGCCTGCC	chr6:127800641-127800681:-	TGTAAAATGAGGATAATAAGGCCTGCCTGCCTGTCTTACA	157	1	137	1
2-qE1-35981.1	Eutherian	6-qF3-28913.1	Murine-specific	chr2:92573033-92573063:+	TGTAAAATGGGGATAATAATAAGCCTGCCT	chr6:127800641-127800681:-	TGTAAAATGAGGATAATAAGGCCTGCCTGCCTGTCTTACA	1225	1	137	1
2-qE1-35981.1	Eutherian	6-qF3-28913.1	Murine-specific	chr2:92573033-92573064:+	TGTAAAATGGGGATAATAATAAGCCTGCCTG	chr6:127800641-127800681:-	TGTAAAATGAGGATAATAAGGCCTGCCTGCCTGTCTTACA	143	1	137	1
2-qE1-35981.1	Eutherian	6-qF3-28913.1	Murine-specific	chr2:92573033-92573065:+	TGTAAAATGGGGATAATAATAAGCCTGCCTGC	chr6:127800641-127800681:-	TGTAAAATGAGGATAATAAGGCCTGCCTGCCTGTCTTACA	59	1	137	1
6-qF3-28913.1	Murine-specific	6-qF3-28913.1	Murine-specific	chr6:127797090-127797119:+	TGTAAAATGGGGATAGTATTGGGTAAAGC	chr6:127800641-127800681:-	TGTAAAATGAGGATAATAAGGCCTGCCTGCCTGTCTTACA	37	1	137	1
15-qE1-8387.1	Eutherian	6-qF3-28913.1	Murine-specific	chr15:78661485-78661514:-	TACAATGGCCTCTCAGCTTCTCTGGTCTA	chr6:127806856-127806896:-	GACAATGGCTCCTCAGGTCCTCTGCATGACTGTCTTGAGG	35	1	21	1
15-qE1-8387.1	Eutherian	6-qF3-28913.1	Murine-specific	chr15:78661485-78661514:-	TACAATGGCCTCTCAGCTTCTCTGGTCTT	chr6:127806856-127806896:-	GACAATGGCTCCTCAGGTCCTCTGCATGACTGTCTTGAGG	99	1	21	1
15-qE1-8387.1	Eutherian	6-qF3-28913.1	Murine-specific	chr15:78661486-78661514:-	TACAATGGCCTCTCAGCTTCTCTGGTCT	chr6:127806856-127806896:-	GACAATGGCTCCTCAGGTCCTCTGCATGACTGTCTTGAGG	597	1	21	1
15-qE1-8387.1	Eutherian	6-qF3-28913.1	Murine-specific	chr15:78661487-78661514:-	TACAATGGCCTCTCAGCTTCTCTGGTC	chr6:127806856-127806896:-	GACAATGGCTCCTCAGGTCCTCTGCATGACTGTCTTGAGG	290	1	21	1
15-qE1-8387.1	Eutherian	6-qF3-28913.1	Murine-specific	chr15:78661487-78661514:-	TACAATGGCCTCTCAGCTTCTCTGGTT	chr6:127806856-127806896:-	GACAATGGCTCCTCAGGTCCTCTGCATGACTGTCTTGAGG	36	1	21	1
15-qE1-8387.1	Eutherian	6-qF3-28913.1	Murine-specific	chr15:78661488-78661514:-	TACAATGGCCTCTCAGCTTCTCTGGT	chr6:127806856-127806896:-	GACAATGGCTCCTCAGGTCCTCTGCATGACTGTCTTGAGG	199	1	21	1
15-qE1-8387.1	Eutherian	6-qF3-28913.1	Murine-specific	chr15:78661489-78661514:-	TACAATGGCCTCTCAGCTTCTCTGG	chr6:127806856-127806896:-	GACAATGGCTCCTCAGGTCCTCTGCATGACTGTCTTGAGG	62	1	21	1
10-qC2-545.1	Mouse-specific	5-qF-14224.1	Eutherian	chr10:94675943-94675969:-	TGTCAGTCAGTCAGTTTCAGGGCTAC	chr5:113351158-113351198:-	GGTCAGTCAGGAGGTATCAGGAATGCAAGAAACTCAAAAT	184	1	25	1
10-qC1-875.1	Murine-specific	9-qC-31469.1	Murine-specific	chr10:86618910-86618940:+	TTCATTCATTCACTCACTCATTCATTCTCT	chr9:67728538-67728578:+	TTCATTCATTCATTCATACATTCATACATTAATTCATCAT	93	1	57	1
10-qC1-875.1	Murine-specific	9-qC-31469.1	Murine-specific	chr10:86618910-86618941:+	TTCATTCATTCACTCACTCATTCATTCTCTC	chr9:67728538-67728578:+	TTCATTCATTCATTCATACATTCATACATTAATTCATCAT	65	1	57	1
10-qC1-875.1	Murine-specific	9-qC-31469.1	Murine-specific	chr10:86618910-86618942:+	TTCATTCATTCACTCACTCATTCATTCTCTCC	chr9:67728538-67728578:+	TTCATTCATTCATTCATACATTCATACATTAATTCATCAT	129	1	57	1
10-qC1-875.1	Murine-specific	9-qC-31469.1	Murine-specific	chr10:86618914-86618943:+	TTCATTCACTCACTCATTCATTCTCTCCC	chr9:67728538-67728578:+	TTCATTCATTCATTCATACATTCATACATTAATTCATCAT	33	1	57	1
10-qC1-875.1	Murine-specific	9-qC-31469.1	Murine-specific	chr10:86618914-86618944:+	TTCATTCACTCACTCATTCATTCTCTCCCT	chr9:67728538-67728578:+	TTCATTCATTCATTCATACATTCATACATTAATTCATCAT	561	1	57	1
10-qC1-875.1	Murine-specific	9-qC-31469.1	Murine-specific	chr10:86618914-86618945:+	TTCATTCACTCACTCATTCATTCTCTCCCTC	chr9:67728538-67728578:+	TTCATTCATTCATTCATACATTCATACATTAATTCATCAT	50	1	57	1
17-qE1.1-7037.1	Mouse-specific	9-qC-31469.1	Murine-specific	chr17:66208699-66208729:+	TTCATTCATTCATTCATCCATACATTCTCT	chr9:67728538-67728578:+	TTCATTCATTCATTCATACATTCATACATTAATTCATCAT	35	1	57	1
17-qE1.1-7037.1	Mouse-specific	9-qC-31469.1	Murine-specific	chr17:66208703-66208733:+	TTCATTCATTCATCCATACATTCTCTCTCT	chr9:67728538-67728578:+	TTCATTCATTCATTCATACATTCATACATTAATTCATCAT	295	2	57	1
17-qE1.1-7037.1	Mouse-specific	9-qC-31469.1	Murine-specific	chr17:66208703-66208734:+	TTCATTCATTCATCCATACATTCTCTCTCTC	chr9:67728538-67728578:+	TTCATTCATTCATTCATACATTCATACATTAATTCATCAT	91	2	57	1
17-qE1.1-7037.1	Mouse-specific	9-qC-31469.1	Murine-specific	chr17:66208703-66208735:+	TTCATTCATTCATCCATACATTCTCTCTCTCT	chr9:67728538-67728578:+	TTCATTCATTCATTCATACATTCATACATTAATTCATCAT	91	2	57	1
7-qD1-654.1	Murine-specific	9-qC-31469.1	Murine-specific	chr7:73104560-73104590:-	TTCATTCATTCTTTCTTTCGTTCATTCGTT	chr9:67728538-67728578:+	TTCATTCATTCATTCATACATTCATACATTAATTCATCAT	266	1	57	1
7-qD1-654.1	Murine-specific	9-qC-31469.1	Murine-specific	chr7:73104561-73104590:-	TTCATTCATTCTTTCTTTCGTTCATTCGT	chr9:67728538-67728578:+	TTCATTCATTCATTCATACATTCATACATTAATTCATCAT	93	1	57	1
7-qD2-11976.1	Eutherian	17-qE1.1-7037.1	Mouse-specific	chr7:73836246-73836277:+	TCAGATGCAGAAATCCACAGCCAAAGATTGT	chr17:66220846-66220886:-	ACAGATGCAGATACTCACAGCCAACCACTGGACTGAGCCA	42	1	29	1
18-qE1-36451.1	Eutherian	14-qA3-2286.1	Mouse-specific	chr18:67038045-67038072:-	TGTTTTCTCTTTGTAGTGCTGGAGATG	chr14:24367613-24367653:+	TGTTTTCTCTAAGTGTTGCTGGAAAGTTCTTTCTTCCTGG	41	1	61	1
10-qB4-6488.1	Murine-specific	10-qC1-12816.1	Murine-specific	chr10:62676286-62676316:+	TTTAATCCCAGTTCTCGGGAGTTTGAGAGC	chr10:75858442-75858482:-	CTTAATCCCAACACTCAGGAGGCAGAAGCAGGTGGATCTC	40	1	68	1
17-qA3.3-27363.1	Eutherian	10-qC1-12816.1	Murine-specific	chr17:27297330-27297360:-	TTTAATCCCAGCACTCACGCAGAAAAGGCA	chr10:75858442-75858482:-	CTTAATCCCAACACTCAGGAGGCAGAAGCAGGTGGATCTC	34	1	68	1
5-qF-14224.1	Eutherian	10-qC1-12816.1	Murine-specific	chr5:113343582-113343610:+	TTTAATCCCAGCTCTTGGGAGGCGGAGG	chr10:75858442-75858482:-	CTTAATCCCAACACTCAGGAGGCAGAAGCAGGTGGATCTC	253	4	68	1
5-qF-14224.1	Eutherian	10-qC1-12816.1	Murine-specific	chr5:113343582-113343611:+	TTTAATCCCAGCTCTTGGGAGGCGGAGGC	chr10:75858442-75858482:-	CTTAATCCCAACACTCAGGAGGCAGAAGCAGGTGGATCTC	174	4	68	1
15-qD1-17920.1	Eutherian	7-qD2-24830.1	Eutherian	chr15:59267352-59267381:-	AACAATATCAAGCAACCAGACTCCCCAGA	chr7:73806233-73806273:+	AACAATATCAACCAACCAGACCCCCCCATAGCTCCCAAGG	146	2	24	1
15-qD1-17920.1	Eutherian	7-qD2-24830.1	Eutherian	chr15:59267355-59267381:-	AACAATATCAAGCAACCAGACTCCCC	chr7:73806233-73806273:+	AACAATATCAACCAACCAGACCCCCCCATAGCTCCCAAGG	116	2	24	1
15-qD1-17920.1	Eutherian	7-qD2-24830.1	Eutherian	chr15:59267356-59267381:-	AACAATATCAAGCAACCAGACTCCC	chr7:73806233-73806273:+	AACAATATCAACCAACCAGACCCCCCCATAGCTCCCAAGG	219	2	24	1
15-qD1-17920.1	Eutherian	7-qD2-24830.1	Eutherian	chr15:59267357-59267381:-	AACAATATCAAGCAACCAGACTCC	chr7:73806233-73806273:+	AACAATATCAACCAACCAGACCCCCCCATAGCTCCCAAGG	146	2	24	1
17-qE1.1-7037.1	Mouse-specific	9-qA5.3-24188.1	Eutherian	chr17:66221816-66221845:+	TCAATTCCTAGCAAACACATGATGGTTCA	chr9:54211329-54211369:+	TCAATTCCCAGCAACCACATGGTGGCTCACAACCATCTAT	59	1	29	1
17-qE1.1-7037.1	Mouse-specific	9-qA5.3-24188.1	Eutherian	chr17:66221816-66221846:+	TCAATTCCTAGCAAACACATGATGGTTCAC	chr9:54211329-54211369:+	TCAATTCCCAGCAACCACATGGTGGCTCACAACCATCTAT	93	1	29	1
7-qD1-16444.1	Eutherian	7-qD2-24830.1	Eutherian	chr7:69924017-69924043:+	TGTAAATTCCTTGAGGGCAGGGGTTC	chr7:73812219-73812259:+	TGTAAATTCCCTGTGGGCATGGATTGTGTTTTATGGGTCT	35	1	33	1
7-qD1-16444.1	Eutherian	7-qD2-24830.1	Eutherian	chr7:69924017-69924044:+	TGTAAATTCCTTGAGGGCAGGGGTTCT	chr7:73812219-73812259:+	TGTAAATTCCCTGTGGGCATGGATTGTGTTTTATGGGTCT	105	1	33	1
7-qD1-16444.1	Eutherian	7-qD2-24830.1	Eutherian	chr7:69924017-69924045:+	TGTAAATTCCTTGAGGGCAGGGGTTCTA	chr7:73812219-73812259:+	TGTAAATTCCCTGTGGGCATGGATTGTGTTTTATGGGTCT	56	1	33	1
7-qD1-16444.1	Eutherian	7-qD2-24830.1	Eutherian	chr7:69924017-69924046:+	TGTAAATTCCTTGAGGGCAGGGGTTCTAC	chr7:73812219-73812259:+	TGTAAATTCCCTGTGGGCATGGATTGTGTTTTATGGGTCT	55	1	33	1
7-qD1-16444.1	Eutherian	7-qD2-24830.1	Eutherian	chr7:69924017-69924047:+	TGTAAATTCCTTGAGGGCAGGGGTTCTACT	chr7:73812219-73812259:+	TGTAAATTCCCTGTGGGCATGGATTGTGTTTTATGGGTCT	40	1	33	1
17-qA3.3-26735.1	Eutherian	12-qE-7089.1	Eutherian	chr17:27334698-27334727:+	TATTTATTGAGCACCTACGATGTGCCAGG	chr12:98422060-98422100:-	CATTTATTGAGTGCCTACTGTGTGTCAAGTATGGTATTGC	101	1	81	1
17-qA3.3-26735.1	Eutherian	12-qE-7089.1	Eutherian	chr17:27334698-27334728:+	TATTTATTGAGCACCTACGATGTGCCAGGC	chr12:98422060-98422100:-	CATTTATTGAGTGCCTACTGTGTGTCAAGTATGGTATTGC	1132	1	81	1
17-qA3.3-26735.1	Eutherian	12-qE-7089.1	Eutherian	chr17:27334698-27334729:+	TATTTATTGAGCACCTACGATGTGCCAGGCA	chr12:98422060-98422100:-	CATTTATTGAGTGCCTACTGTGTGTCAAGTATGGTATTGC	221	1	81	1
17-qA3.3-26735.1	Eutherian	12-qE-7089.1	Eutherian	chr17:27334698-27334729:+	TATTTATTGAGCACCTACGATGTGCCAGGCT	chr12:98422060-98422100:-	CATTTATTGAGTGCCTACTGTGTGTCAAGTATGGTATTGC	83	1	81	1
17-qA3.3-26735.1	Eutherian	12-qE-7089.1	Eutherian	chr17:27334698-27334730:+	TATTTATTGAGCACCTACGATGTGCCAGGCAT	chr12:98422060-98422100:-	CATTTATTGAGTGCCTACTGTGTGTCAAGTATGGTATTGC	40	1	81	1
6-qD1-2831.1	Murine-specific	12-qE-7089.1	Eutherian	chr6:87991084-87991115:-	TATTTATTGAGGGCCTACTATGTGCCGGGCT	chr12:98422060-98422100:-	CATTTATTGAGTGCCTACTGTGTGTCAAGTATGGTATTGC	72	1	81	1
6-qD1-2831.1	Murine-specific	12-qE-7089.1	Eutherian	chr6:87991085-87991115:-	TATTTATTGAGGGCCTACTATGTGCCGGGT	chr12:98422060-98422100:-	CATTTATTGAGTGCCTACTGTGTGTCAAGTATGGTATTGC	167	1	81	1
6-qD1-2831.1	Murine-specific	12-qE-7089.1	Eutherian	chr6:87991085-87991115:-	TATTTATTGAGGGCCTACTATGTGCCGGGC	chr12:98422060-98422100:-	CATTTATTGAGTGCCTACTGTGTGTCAAGTATGGTATTGC	645	1	81	1
6-qD1-2831.1	Murine-specific	12-qE-7089.1	Eutherian	chr6:87991086-87991115:-	TATTTATTGAGGGCCTACTATGTGCCGGG	chr12:98422060-98422100:-	CATTTATTGAGTGCCTACTGTGTGTCAAGTATGGTATTGC	1155	1	81	1
6-qD1-2831.1	Murine-specific	12-qE-7089.1	Eutherian	chr6:87991087-87991115:-	TATTTATTGAGGGCCTACTATGTGCCGG	chr12:98422060-98422100:-	CATTTATTGAGTGCCTACTGTGTGTCAAGTATGGTATTGC	70	1	81	1
9-qC-31469.1	Murine-specific	7-qD1-654.1	Murine-specific	chr9:67728520-67728545:-	GAATGAATGAATGAATGGGGGTGTC	chr7:73104579-73104619:+	GAATGAATGAATGAATGAATGACAAAATATGCCCTGTGCA	35	1	17	1
17-qA3.3-27363.1	Eutherian	12-qE-23911.1	Eutherian	chr17:27311751-27311776:-	GTGTAGCATACGTGTTTGCCTGGAC	chr12:98397789-98397829:+	TTGTAGCATAAGTGTTAACCAAGACATTGAAGTTAATTAT	36	1	54	1
14-qA3-3095.1	Mouse-specific	15-qD1-4001.1	Murine-specific	chr14:19638775-19638805:-	TAGCACTCTAGGCTCTTATTGAACCTACTC	chr15:59292965-59293005:-	TAGCACTCTAAGCTCAGGTTGATCCACTCCACTACTGCTG	39	1	15	1
14-qC1-1261.1	Mouse-specific	15-qD1-4001.1	Murine-specific	chr14:44775476-44775507:-	TAGCACTTTAGGCTCTGATTGACCATCCTCT	chr15:59292965-59293005:-	TAGCACTCTAAGCTCAGGTTGATCCACTCCACTACTGCTG	101	1	15	1
14-qC1-1261.1	Mouse-specific	15-qD1-4001.1	Murine-specific	chr14:44775476-44775507:-	TAGCACTTTAGGCTCTGATTGACCATCCTCC	chr15:59292965-59293005:-	TAGCACTCTAAGCTCAGGTTGATCCACTCCACTACTGCTG	93	1	15	1
14-qC1-1261.1	Mouse-specific	15-qD1-4001.1	Murine-specific	chr14:44775477-44775507:-	TAGCACTTTAGGCTCTGATTGACCATCCTC	chr15:59292965-59293005:-	TAGCACTCTAAGCTCAGGTTGATCCACTCCACTACTGCTG	141	1	15	1
14-qC1-1261.1	Mouse-specific	15-qD1-4001.1	Murine-specific	chr14:44775477-44775507:-	TAGCACTTTAGGCTCTGATTGACCATCCTA	chr15:59292965-59293005:-	TAGCACTCTAAGCTCAGGTTGATCCACTCCACTACTGCTG	35	1	15	1
14-qC1-1261.1	Mouse-specific	15-qD1-4001.1	Murine-specific	chr14:44775478-44775507:-	TAGCACTTTAGGCTCTGATTGACCATCCT	chr15:59292965-59293005:-	TAGCACTCTAAGCTCAGGTTGATCCACTCCACTACTGCTG	998	1	15	1
14-qC1-1010.1	Mouse-specific	15-qD1-4001.1	Murine-specific	chr14:44942704-44942733:+	TAGCACTCTAGGCTCTGATCGACCATACT	chr15:59292965-59293005:-	TAGCACTCTAAGCTCAGGTTGATCCACTCCACTACTGCTG	47	1	15	1
14-qC1-1010.1	Mouse-specific	15-qD1-4001.1	Murine-specific	chr14:44942704-44942734:+	TAGCACTCTAGGCTCTGATCGACCATACTT	chr15:59292965-59293005:-	TAGCACTCTAAGCTCAGGTTGATCCACTCCACTACTGCTG	37	1	15	1
5-qG3-23659.1	Eutherian	6-qF3-28913.1	Murine-specific	chr5:149802415-149802445:-	TTAGACTACTTCCTGTTGACTAGGGGTACT	chr6:127825741-127825781:-	TTAGACTACTTCCTGCTGGTTGTGGGCGTCAAGTTTCCTG	335	1	62	1
5-qG3-23659.1	Eutherian	6-qF3-28913.1	Murine-specific	chr5:149802415-149802445:-	TTAGACTACTTCCTGTTGACTAGGGGTACC	chr6:127825741-127825781:-	TTAGACTACTTCCTGCTGGTTGTGGGCGTCAAGTTTCCTG	963	1	62	1
5-qG3-23659.1	Eutherian	6-qF3-28913.1	Murine-specific	chr5:149802418-149802445:-	TTAGACTACTTCCTGTTGACTAGGGGT	chr6:127825741-127825781:-	TTAGACTACTTCCTGCTGGTTGTGGGCGTCAAGTTTCCTG	112	1	62	1
5-qG3-23659.1	Eutherian	6-qF3-28913.1	Murine-specific	chr5:149802419-149802445:-	TTAGACTACTTCCTGTTGACTAGGGG	chr6:127825741-127825781:-	TTAGACTACTTCCTGCTGGTTGTGGGCGTCAAGTTTCCTG	72	2	62	1
12-qE-23911.1	Eutherian	2-qE1-35981.1	Eutherian	chr12:98395799-98395828:-	GATTCAAGTAGTCTTTCAGGGTTAAACTC	chr2:92550608-92550648:-	TATTCAAGCAGGTCTTCAGGGTCAACCCTCATGAGTAAGA	89	1	22	1
17-qA3.3-27363.1	Eutherian	6-qF3-28913.1	Murine-specific	chr17:27291013-27291040:-	ATTGTAGAAAGCAGGGGGAATAGAGAA	chr6:127799169-127799209:-	CTTGTAGAAAGCAGGGAAAATATTAGAACATTGAACTGAT	96	1	28	1
17-qA3.3-27363.1	Eutherian	6-qF3-28913.1	Murine-specific	chr17:27291014-27291040:-	ATTGTAGAAAGCAGGGGGAATAGAGA	chr6:127799169-127799209:-	CTTGTAGAAAGCAGGGAAAATATTAGAACATTGAACTGAT	81	1	28	1
17-qA3.3-27363.1	Eutherian	6-qF3-28913.1	Murine-specific	chr17:27291015-27291040:-	ATTGTAGAAAGCAGGGGGAATAGAG	chr6:127799169-127799209:-	CTTGTAGAAAGCAGGGAAAATATTAGAACATTGAACTGAT	33	1	28	1
17-qA3.3-26735.1	Eutherian	7-qD1-19431.1	Eutherian	chr17:27363966-27363990:+	TGAACTTCTTACTCTCCTGCCTCT	chr7:73113599-73113639:-	TGAACTTCTGACCCTCCTGCCTCCACCTCCAGAATGCTGG	41	1	41	1
17-qA3.3-26735.1	Eutherian	7-qD1-19431.1	Eutherian	chr17:27363966-27363992:+	TGAACTTCTTACTCTCCTGCCTCTCC	chr7:73113599-73113639:-	TGAACTTCTGACCCTCCTGCCTCCACCTCCAGAATGCTGG	94	1	41	1
17-qA3.3-26735.1	Eutherian	7-qD1-19431.1	Eutherian	chr17:27363966-27363993:+	TGAACTTCTTACTCTCCTGCCTCTCCT	chr7:73113599-73113639:-	TGAACTTCTGACCCTCCTGCCTCCACCTCCAGAATGCTGG	129	1	41	1
18-qE1-36451.1	Eutherian	7-qD1-19431.1	Eutherian	chr18:67042514-67042544:-	TGAACTTCCCATCCTTCTGCCTCTACCTCC	chr7:73113599-73113639:-	TGAACTTCTGACCCTCCTGCCTCCACCTCCAGAATGCTGG	33	1	41	1
18-qE1-36451.1	Eutherian	7-qD1-19431.1	Eutherian	chr18:67042515-67042544:-	TGAACTTCCCATCCTTCTGCCTCTACCTC	chr7:73113599-73113639:-	TGAACTTCTGACCCTCCTGCCTCCACCTCCAGAATGCTGG	47	1	41	1
18-qE1-36451.1	Eutherian	7-qD1-19431.1	Eutherian	chr18:67042516-67042544:-	TGAACTTCCCATCCTTCTGCCTCTACCT	chr7:73113599-73113639:-	TGAACTTCTGACCCTCCTGCCTCCACCTCCAGAATGCTGG	116	1	41	1
18-qE1-36451.1	Eutherian	7-qD1-19431.1	Eutherian	chr18:67042517-67042544:-	TGAACTTCCCATCCTTCTGCCTCTACC	chr7:73113599-73113639:-	TGAACTTCTGACCCTCCTGCCTCCACCTCCAGAATGCTGG	63	1	41	1
5-qG2-2301.1	Mouse-specific	7-qD1-19431.1	Eutherian	chr5:143764330-143764357:+	TGAACTTGTGATTCTCCTGCGTCAGGC	chr7:73113599-73113639:-	TGAACTTCTGACCCTCCTGCCTCCACCTCCAGAATGCTGG	77	1	41	1
5-qG2-2301.1	Mouse-specific	7-qD1-19431.1	Eutherian	chr5:143764330-143764358:+	TGAACTTGTGATTCTCCTGCGTCAGGCT	chr7:73113599-73113639:-	TGAACTTCTGACCCTCCTGCCTCCACCTCCAGAATGCTGG	343	1	41	1
5-qG2-2301.1	Mouse-specific	7-qD1-19431.1	Eutherian	chr5:143764330-143764359:+	TGAACTTGTGATTCTCCTGCGTCAGGCTC	chr7:73113599-73113639:-	TGAACTTCTGACCCTCCTGCCTCCACCTCCAGAATGCTGG	58	1	41	1
5-qG2-2301.1	Mouse-specific	7-qD1-19431.1	Eutherian	chr5:143764330-143764360:+	TGAACTTGTGATTCTCCTGCGTCAGGCTCC	chr7:73113599-73113639:-	TGAACTTCTGACCCTCCTGCCTCCACCTCCAGAATGCTGG	212	1	41	1
18-qE1-36451.1	Eutherian	6-qF3-8009.1	Eutherian	chr18:67046432-67046461:-	TGCAATCTCTCCAAAGCCCGTGAGTGACT	chr6:127794429-127794469:+	TGCAATCCCTCCTGACCCCGTCCCATCCCCAAAACCTTTT	38	1	17	1
18-qE1-36451.1	Eutherian	6-qF3-8009.1	Eutherian	chr18:67046435-67046461:-	TGCAATCTCTCCAAAGCCCGTGAGTG	chr6:127794429-127794469:+	TGCAATCCCTCCTGACCCCGTCCCATCCCCAAAACCTTTT	31	1	17	1
18-qE1-36451.1	Eutherian	6-qF3-8009.1	Eutherian	chr18:67046436-67046461:-	TGCAATCTCTCCAAAGCCCGTGAGT	chr6:127794429-127794469:+	TGCAATCCCTCCTGACCCCGTCCCATCCCCAAAACCTTTT	34	1	17	1
10-qC1-12816.1	Murine-specific	9-qC-10667.1	Eutherian	chr10:75858405-75858430:+	TTTCTCTCTGTAGACCAGGCTGACC	chr9:67742151-67742191:-	TTTCTCTGTATAGCCCTGGCTGTCCTGGAACTCACTTTTA	63	1	24	1
10-qC1-2617.1	Murine-specific	9-qC-10667.1	Eutherian	chr10:85748664-85748693:+	TTTCTCTGTGTAGGCCTGACTGTACTGGA	chr9:67742151-67742191:-	TTTCTCTGTATAGCCCTGGCTGTCCTGGAACTCACTTTTA	440	3	24	1
10-qC1-1527.1	Mouse-specific	9-qC-10667.1	Eutherian	chr10:86591382-86591411:-	TTTCTCTGTGTAGGCCTGACTGTACTGGA	chr9:67742151-67742191:-	TTTCTCTGTATAGCCCTGGCTGTCCTGGAACTCACTTTTA	440	3	24	1
10-qC1-875.1	Murine-specific	9-qC-10667.1	Eutherian	chr10:86617130-86617159:+	TTTCTCTGTGTAGGCCTGACTGTACTGGA	chr9:67742151-67742191:-	TTTCTCTGTATAGCCCTGGCTGTCCTGGAACTCACTTTTA	440	3	24	1
pi-Tmem194.1	Murine-specific	9-qC-10667.1	Eutherian	chr10:127697479-127697508:+	TTTCTCTGCATAGCCCTTGCTGTCGTAGA	chr9:67742151-67742191:-	TTTCTCTGTATAGCCCTGGCTGTCCTGGAACTCACTTTTA	31	1	24	1
17-qE1.1-7037.1	Mouse-specific	9-qC-10667.1	Eutherian	chr17:66206921-66206949:+	TTTCTCTGCATAGCCCTGGTATCCTAGA	chr9:67742151-67742191:-	TTTCTCTGTATAGCCCTGGCTGTCCTGGAACTCACTTTTA	54	1	24	1
17-qE1.1-7037.1	Mouse-specific	9-qC-10667.1	Eutherian	chr17:66206921-66206950:+	TTTCTCTGCATAGCCCTGGTATCCTAGAA	chr9:67742151-67742191:-	TTTCTCTGTATAGCCCTGGCTGTCCTGGAACTCACTTTTA	47	1	24	1
2-qE1-35981.1	Eutherian	9-qC-10667.1	Eutherian	chr2:92568221-92568246:+	TTTCTCTGTGGGGCCCTGGATGTCC	chr9:67742151-67742191:-	TTTCTCTGTATAGCCCTGGCTGTCCTGGAACTCACTTTTA	109	1	24	1
2-qE1-35981.1	Eutherian	9-qC-10667.1	Eutherian	chr2:92568221-92568249:+	TTTCTCTGTGGGGCCCTGGATGTCCTGG	chr9:67742151-67742191:-	TTTCTCTGTATAGCCCTGGCTGTCCTGGAACTCACTTTTA	280	1	24	1
2-qE1-35981.1	Eutherian	9-qC-10667.1	Eutherian	chr2:92568221-92568250:+	TTTCTCTGTGGGGCCCTGGATGTCCTGGA	chr9:67742151-67742191:-	TTTCTCTGTATAGCCCTGGCTGTCCTGGAACTCACTTTTA	996	1	24	1
2-qE1-35981.1	Eutherian	9-qC-10667.1	Eutherian	chr2:92568221-92568251:+	TTTCTCTGTGGGGCCCTGGATGTCCTGGAA	chr9:67742151-67742191:-	TTTCTCTGTATAGCCCTGGCTGTCCTGGAACTCACTTTTA	38	1	24	1
2-qE1-35981.1	Eutherian	9-qC-10667.1	Eutherian	chr2:92568221-92568252:+	TTTCTCTGTGGGGCCCTGGATGTCCTGGAAC	chr9:67742151-67742191:-	TTTCTCTGTATAGCCCTGGCTGTCCTGGAACTCACTTTTA	42	1	24	1
2-qE1-35981.1	Eutherian	9-qC-10667.1	Eutherian	chr2:92580704-92580731:+	TTTCTCTGTGTTGCCTTGACTGTCCTG	chr9:67742151-67742191:-	TTTCTCTGTATAGCCCTGGCTGTCCTGGAACTCACTTTTA	167	5	24	1
2-qE1-35981.1	Eutherian	9-qC-10667.1	Eutherian	chr2:92580704-92580732:+	TTTCTCTGTGTTGCCTTGACTGTCCTGG	chr9:67742151-67742191:-	TTTCTCTGTATAGCCCTGGCTGTCCTGGAACTCACTTTTA	215	4	24	1
2-qE1-35981.1	Eutherian	9-qC-10667.1	Eutherian	chr2:92580704-92580733:+	TTTCTCTGTGTTGCCTTGACTGTCCTGGA	chr9:67742151-67742191:-	TTTCTCTGTATAGCCCTGGCTGTCCTGGAACTCACTTTTA	883	3	24	1
2-qE1-35981.1	Eutherian	9-qC-10667.1	Eutherian	chr2:92580704-92580735:+	TTTCTCTGTGTTGCCTTGACTGTCCTGGAAT	chr9:67742151-67742191:-	TTTCTCTGTATAGCCCTGGCTGTCCTGGAACTCACTTTTA	49	1	24	1
7-qD1-19431.1	Eutherian	9-qC-10667.1	Eutherian	chr7:73137874-73137901:+	TTTCTCTGTGGGGTCCTGGCTGTCCTG	chr9:67742151-67742191:-	TTTCTCTGTATAGCCCTGGCTGTCCTGGAACTCACTTTTA	76	1	24	1
7-qD1-19431.1	Eutherian	9-qC-10667.1	Eutherian	chr7:73137874-73137902:+	TTTCTCTGTGGGGTCCTGGCTGTCCTGA	chr9:67742151-67742191:-	TTTCTCTGTATAGCCCTGGCTGTCCTGGAACTCACTTTTA	523	1	24	1
7-qD1-19431.1	Eutherian	9-qC-10667.1	Eutherian	chr7:73137874-73137903:+	TTTCTCTGTGGGGTCCTGGCTGTCCTGAA	chr9:67742151-67742191:-	TTTCTCTGTATAGCCCTGGCTGTCCTGGAACTCACTTTTA	271	1	24	1
7-qD1-19431.1	Eutherian	9-qC-10667.1	Eutherian	chr7:73137874-73137903:+	TTTCTCTGTGGGGTCCTGGCTGTCCTGAT	chr9:67742151-67742191:-	TTTCTCTGTATAGCCCTGGCTGTCCTGGAACTCACTTTTA	46	1	24	1
7-qD1-19431.1	Eutherian	9-qC-10667.1	Eutherian	chr7:73137874-73137904:+	TTTCTCTGTGGGGTCCTGGCTGTCCTGAAA	chr9:67742151-67742191:-	TTTCTCTGTATAGCCCTGGCTGTCCTGGAACTCACTTTTA	34	1	24	1
7-qD1-19431.1	Eutherian	9-qC-10667.1	Eutherian	chr7:73137874-73137904:+	TTTCTCTGTGGGGTCCTGGCTGTCCTGAAT	chr9:67742151-67742191:-	TTTCTCTGTATAGCCCTGGCTGTCCTGGAACTCACTTTTA	75	1	24	1
6-qF3-8009.1	Eutherian	7-qD1-19431.1	Eutherian	chr6:127785303-127785331:-	TCAGATGCTACAAAGTGAGACATGACCT	chr7:73116663-73116703:-	CCAGATGCTAGAAGGAAAGACGTTTTAAGCAAATGCCCTG	46	1	13	1
10-qC1-12816.1	Murine-specific	2-qE1-35981.1	Eutherian	chr10:75861374-75861400:+	TATTGAAACAATGGTTCCCAAGGAAA	chr2:92586741-92586781:-	TATTGAAACAATGAACCCCAAGAAATTGGAATTCCCCCAG	78	1	81	1
10-qC1-12816.1	Murine-specific	2-qE1-35981.1	Eutherian	chr10:75861374-75861401:+	TATTGAAACAATGGTTCCCAAGGAAAT	chr2:92586741-92586781:-	TATTGAAACAATGAACCCCAAGAAATTGGAATTCCCCCAG	195	1	81	1
10-qC1-12816.1	Murine-specific	2-qE1-35981.1	Eutherian	chr10:75861374-75861402:+	TATTGAAACAATGGTTCCCAAGGAAATG	chr2:92586741-92586781:-	TATTGAAACAATGAACCCCAAGAAATTGGAATTCCCCCAG	506	1	81	1
10-qC1-12816.1	Murine-specific	2-qE1-35981.1	Eutherian	chr10:75861374-75861403:+	TATTGAAACAATGGTTCCCAAGGAAATGG	chr2:92586741-92586781:-	TATTGAAACAATGAACCCCAAGAAATTGGAATTCCCCCAG	461	1	81	1
10-qC1-12816.1	Murine-specific	2-qE1-35981.1	Eutherian	chr10:75861374-75861403:+	TATTGAAACAATGGTTCCCAAGGAAATGT	chr2:92586741-92586781:-	TATTGAAACAATGAACCCCAAGAAATTGGAATTCCCCCAG	64	2	81	1
10-qC1-12816.1	Murine-specific	2-qE1-35981.1	Eutherian	chr10:75861374-75861404:+	TATTGAAACAATGGTTCCCAAGGAAATGGA	chr2:92586741-92586781:-	TATTGAAACAATGAACCCCAAGAAATTGGAATTCCCCCAG	37	1	81	1
10-qC1-12816.1	Murine-specific	2-qE1-35981.1	Eutherian	chr10:75861374-75861404:+	TATTGAAACAATGGTTCCCAAGGAAATGGT	chr2:92586741-92586781:-	TATTGAAACAATGAACCCCAAGAAATTGGAATTCCCCCAG	54	1	81	1
10-qC1-12816.1	Murine-specific	2-qE1-35981.1	Eutherian	chr10:75861374-75861405:+	TATTGAAACAATGGTTCCCAAGGAAATGGAT	chr2:92586741-92586781:-	TATTGAAACAATGAACCCCAAGAAATTGGAATTCCCCCAG	62	1	81	1
17-qE1.1-7037.1	Mouse-specific	4-qC5-17839.1	Eutherian	chr17:66221022-66221051:+	TTCCTTCAGTCTCTGCTTCATTTTTGTTG	chr4:94280913-94280953:+	TTCCTTCAGTCTCTGCTCCATCTTTGCCCCTGCACTTCTT	41	1	25	1
7-qB5-6255.1	Mouse-specific	4-qC5-17839.1	Eutherian	chr7:52910272-52910300:+	TTCCTTCAGTCTGTGCTGCACATTTTGT	chr4:94280913-94280953:+	TTCCTTCAGTCTCTGCTCCATCTTTGCCCCTGCACTTCTT	88	1	25	1
7-qB5-6255.1	Mouse-specific	4-qC5-17839.1	Eutherian	chr7:52910272-52910301:+	TTCCTTCAGTCTGTGCTGCACATTTTGTC	chr4:94280913-94280953:+	TTCCTTCAGTCTCTGCTCCATCTTTGCCCCTGCACTTCTT	158	1	25	1
7-qB5-6255.1	Mouse-specific	4-qC5-17839.1	Eutherian	chr7:52910272-52910302:+	TTCCTTCAGTCTGTGCTGCACATTTTGTCT	chr4:94280913-94280953:+	TTCCTTCAGTCTCTGCTCCATCTTTGCCCCTGCACTTCTT	84	1	25	1
7-qD2-11976.1	Eutherian	7-qD1-9417.1	Murine-specific	chr7:73821485-73821511:+	AGAAGTCCAAAATCAAGGTACTGGCA	chr7:69886584-69886624:+	AGAAGTCCAAGATCAAGGTGCCAGTAGTATGTTTCTTCTG	86	2	68	1
7-qD2-11976.1	Eutherian	7-qD1-9417.1	Murine-specific	chr7:73821485-73821512:+	AGAAGTCCAAAATCAAGGTACTGGCAG	chr7:69886584-69886624:+	AGAAGTCCAAGATCAAGGTGCCAGTAGTATGTTTCTTCTG	148	2	68	1
7-qD2-11976.1	Eutherian	7-qD1-9417.1	Murine-specific	chr7:73821485-73821513:+	AGAAGTCCAAAATCAAGGTACTGGCAGG	chr7:69886584-69886624:+	AGAAGTCCAAGATCAAGGTGCCAGTAGTATGTTTCTTCTG	538	1	68	1
7-qD2-11976.1	Eutherian	7-qD1-9417.1	Murine-specific	chr7:73821485-73821514:+	AGAAGTCCAAAATCAAGGTACTGGCAGGG	chr7:69886584-69886624:+	AGAAGTCCAAGATCAAGGTGCCAGTAGTATGTTTCTTCTG	62	1	68	1
7-qD2-11976.1	Eutherian	7-qD1-9417.1	Murine-specific	chr7:73821485-73821515:+	AGAAGTCCAAAATCAAGGTACTGGCAGGGT	chr7:69886584-69886624:+	AGAAGTCCAAGATCAAGGTGCCAGTAGTATGTTTCTTCTG	62	1	68	1
18-qE1-36451.1	Eutherian	14-qC1-1261.1	Mouse-specific	chr18:67054606-67054634:-	TTGACATGCCATTTGGCAAGAAGAGACC	chr14:44779962-44780002:+	CTGACATACCATTGGGTTAGAAGAGCTATTTGGGAGCCAC	34	1	17	1
17-qE1.1-7037.1	Mouse-specific	10-qC1-1527.1	Mouse-specific	chr17:66213636-66213664:+	TTTTTTTGTTTGTTTGTTTGATTTGACC	chr10:86589509-86589549:+	GTTTTTTGTTTGTTTGTTTGTTTTTTGTTTGTTTGTTTTC	94	1	23	1
17-qE1.1-7037.1	Mouse-specific	10-qC1-1527.1	Mouse-specific	chr17:66213636-66213665:+	TTTTTTTGTTTGTTTGTTTGATTTGACCT	chr10:86589509-86589549:+	GTTTTTTGTTTGTTTGTTTGTTTTTTGTTTGTTTGTTTTC	449	1	23	1
17-qE1.1-7037.1	Mouse-specific	10-qC1-1527.1	Mouse-specific	chr17:66213636-66213666:+	TTTTTTTGTTTGTTTGTTTGATTTGACCTG	chr10:86589509-86589549:+	GTTTTTTGTTTGTTTGTTTGTTTTTTGTTTGTTTGTTTTC	31	1	23	1
5-qG2-950.1	Murine-specific	17-qA3.3-26735.1	Eutherian	chr5:136934606-136934636:+	TGTAATCCCAGTACTTGGGAACATGTGGGC	chr17:27363973-27364013:-	TGTAATCCCAGCACTCAGGAAGGAGAGGCAGGAGAGTAAG	71	1	41	1
7-qD1-19431.1	Eutherian	17-qA3.3-26735.1	Eutherian	chr7:73113592-73113620:+	TGTAATCCCAGCATTCTGGAGGTGGAGG	chr17:27363973-27364013:-	TGTAATCCCAGCACTCAGGAAGGAGAGGCAGGAGAGTAAG	101	1	41	1
7-qD1-19431.1	Eutherian	17-qA3.3-26735.1	Eutherian	chr7:73113592-73113621:+	TGTAATCCCAGCATTCTGGAGGTGGAGGC	chr17:27363973-27364013:-	TGTAATCCCAGCACTCAGGAAGGAGAGGCAGGAGAGTAAG	78	1	41	1
15-qE1-8387.1	Eutherian	10-qA3-2592.1	Murine-specific	chr15:78662546-78662577:-	TGAAGACCATCACCCTGATAGAGGTATAAGA	chr10:18800720-18800760:+	AGAAGACCAACATCCTGAAAGAGGAAAAAGAAAAAATCCA	165	1	31	1
15-qE1-8387.1	Eutherian	10-qA3-2592.1	Murine-specific	chr15:78662547-78662577:-	TGAAGACCATCACCCTGATAGAGGTATAAG	chr10:18800720-18800760:+	AGAAGACCAACATCCTGAAAGAGGAAAAAGAAAAAATCCA	99	1	31	1
15-qE1-8387.1	Eutherian	10-qA3-2592.1	Murine-specific	chr15:78662549-78662577:-	TGAAGACCATCACCCTGATAGAGGTATA	chr10:18800720-18800760:+	AGAAGACCAACATCCTGAAAGAGGAAAAAGAAAAAATCCA	98	1	31	1
15-qE1-8387.1	Eutherian	10-qA3-2592.1	Murine-specific	chr15:78662550-78662577:-	TGAAGACCATCACCCTGATAGAGGTAT	chr10:18800720-18800760:+	AGAAGACCAACATCCTGAAAGAGGAAAAAGAAAAAATCCA	697	1	31	1
15-qE1-8387.1	Eutherian	10-qA3-2592.1	Murine-specific	chr15:78662551-78662577:-	TGAAGACCATCACCCTGATAGAGGTA	chr10:18800720-18800760:+	AGAAGACCAACATCCTGAAAGAGGAAAAAGAAAAAATCCA	272	1	31	1
15-qE1-8387.1	Eutherian	10-qA3-2592.1	Murine-specific	chr15:78662551-78662577:-	TGAAGACCATCACCCTGATAGAGGTT	chr10:18800720-18800760:+	AGAAGACCAACATCCTGAAAGAGGAAAAAGAAAAAATCCA	39	1	31	1
12-qE-23911.1	Eutherian	9-qC-31469.1	Murine-specific	chr12:98406136-98406167:-	TAGGAGAGTGGAATCTTCAAAAGAAGGCAAT	chr9:67693825-67693865:+	CAGGAGAGTAGAAACTGAAAAAGCTAAAGCAAGATTAACA	163	1	15	1
12-qE-23911.1	Eutherian	9-qC-31469.1	Murine-specific	chr12:98406137-98406167:-	TAGGAGAGTGGAATCTTCAAAAGAAGGCAA	chr9:67693825-67693865:+	CAGGAGAGTAGAAACTGAAAAAGCTAAAGCAAGATTAACA	32	1	15	1
12-qE-23911.1	Eutherian	9-qC-31469.1	Murine-specific	chr12:98406138-98406167:-	TAGGAGAGTGGAATCTTCAAAAGAAGGCA	chr9:67693825-67693865:+	CAGGAGAGTAGAAACTGAAAAAGCTAAAGCAAGATTAACA	112	1	15	1
12-qE-23911.1	Eutherian	9-qC-31469.1	Murine-specific	chr12:98406139-98406167:-	TAGGAGAGTGGAATCTTCAAAAGAAGGC	chr9:67693825-67693865:+	CAGGAGAGTAGAAACTGAAAAAGCTAAAGCAAGATTAACA	160	1	15	1
12-qE-23911.1	Eutherian	9-qC-31469.1	Murine-specific	chr12:98406140-98406167:-	TAGGAGAGTGGAATCTTCAAAAGAAGG	chr9:67693825-67693865:+	CAGGAGAGTAGAAACTGAAAAAGCTAAAGCAAGATTAACA	40	1	15	1
9-qC-31469.1	Murine-specific	17-qC-935.1	Murine-specific	chr9:67721437-67721463:-	TGAGAAAAATGAGTGTCTAGGAAAGA	chr17:49112617-49112657:+	AGAGAAAAAAGAGTGAATCGGAAAAACCAAAATTCCAATC	90	1	20	1
17-qA3.3-26735.1	Eutherian	2-qE1-35981.1	Eutherian	chr17:27346980-27347004:+	TAGAGAAGACTTAGCGAGGGGCTC	chr2:92594001-92594041:-	AAGAGAAGACATGGCGATGGGACTCTCTAGACTCTTGCCT	296	1	42	1
17-qA3.3-26735.1	Eutherian	2-qE1-35981.1	Eutherian	chr17:27346980-27347005:+	TAGAGAAGACTTAGCGAGGGGCTCA	chr2:92594001-92594041:-	AAGAGAAGACATGGCGATGGGACTCTCTAGACTCTTGCCT	75	1	42	1
17-qA3.3-26735.1	Eutherian	2-qE1-35981.1	Eutherian	chr17:27346980-27347007:+	TAGAGAAGACTTAGCGAGGGGCTCACT	chr2:92594001-92594041:-	AAGAGAAGACATGGCGATGGGACTCTCTAGACTCTTGCCT	149	1	42	1
17-qA3.3-26735.1	Eutherian	2-qE1-35981.1	Eutherian	chr17:27346980-27347007:+	TAGAGAAGACTTAGCGAGGGGCTCACA	chr2:92594001-92594041:-	AAGAGAAGACATGGCGATGGGACTCTCTAGACTCTTGCCT	59	1	42	1
10-qB4-6488.1	Murine-specific	18-qE1-36451.1	Eutherian	chr10:62668767-62668796:+	TTCAAGGTCATCTTCTGCTACATAGTAAA	chr18:67042540-67042580:+	TTCAAGGCCATCCCCAGCTACATAGCGAGATTGAGGTTGG	39	1	27	1
10-qB4-6488.1	Murine-specific	18-qE1-36451.1	Eutherian	chr10:62668767-62668798:+	TTCAAGGTCATCTTCTGCTACATAGTAAACT	chr18:67042540-67042580:+	TTCAAGGCCATCCCCAGCTACATAGCGAGATTGAGGTTGG	45	1	27	1
18-qE1-36451.1	Eutherian	2-qE1-35981.1	Eutherian	chr18:67037504-67037535:-	TACCACTGAGCTACATCTCAGCCCTTTGCCT	chr2:92592899-92592939:-	TACCACTGAACTACATCTCCAGCCCTTATACCACATTTTA	107	1	78	1
18-qE1-36451.1	Eutherian	2-qE1-35981.1	Eutherian	chr18:67037505-67037535:-	TACCACTGAGCTACATCTCAGCCCTTTGCC	chr2:92592899-92592939:-	TACCACTGAACTACATCTCCAGCCCTTATACCACATTTTA	103	1	78	1
18-qE1-36451.1	Eutherian	2-qE1-35981.1	Eutherian	chr18:67037506-67037535:-	TACCACTGAGCTACATCTCAGCCCTTTGC	chr2:92592899-92592939:-	TACCACTGAACTACATCTCCAGCCCTTATACCACATTTTA	40	1	78	1
10-qB4-6488.1	Murine-specific	5-qG2-950.1	Murine-specific	chr10:62661908-62661933:+	TACAGAGTGAGTTCCAGAACAGACT	chr5:136936254-136936294:-	TACAGAGTGAGATTCAGGCCAGCCTAGGCAACTCAGTAAG	55	1	50	1
10-qB4-6488.1	Murine-specific	5-qG2-950.1	Murine-specific	chr10:62661908-62661934:+	TACAGAGTGAGTTCCAGAACAGACTG	chr5:136936254-136936294:-	TACAGAGTGAGATTCAGGCCAGCCTAGGCAACTCAGTAAG	157	1	50	1
10-qB4-6488.1	Murine-specific	5-qG2-950.1	Murine-specific	chr10:62661908-62661935:+	TACAGAGTGAGTTCCAGAACAGACTGA	chr5:136936254-136936294:-	TACAGAGTGAGATTCAGGCCAGCCTAGGCAACTCAGTAAG	430	1	50	1
10-qB4-6488.1	Murine-specific	5-qG2-950.1	Murine-specific	chr10:62661908-62661936:+	TACAGAGTGAGTTCCAGAACAGACTGAG	chr5:136936254-136936294:-	TACAGAGTGAGATTCAGGCCAGCCTAGGCAACTCAGTAAG	139	1	50	1
10-qB4-6488.1	Murine-specific	5-qG2-950.1	Murine-specific	chr10:62661908-62661937:+	TACAGAGTGAGTTCCAGAACAGACTGAGC	chr5:136936254-136936294:-	TACAGAGTGAGATTCAGGCCAGCCTAGGCAACTCAGTAAG	147	1	50	1
10-qB4-6488.1	Murine-specific	5-qG2-950.1	Murine-specific	chr10:62661908-62661938:+	TACAGAGTGAGTTCCAGAACAGACTGAGCT	chr5:136936254-136936294:-	TACAGAGTGAGATTCAGGCCAGCCTAGGCAACTCAGTAAG	208	1	50	1
11-qE1-9443.1	Murine-specific	5-qG2-950.1	Murine-specific	chr11:103429608-103429636:+	TACAGAGTGAGTTCCAGGACAGCGCCAG	chr5:136936254-136936294:-	TACAGAGTGAGATTCAGGCCAGCCTAGGCAACTCAGTAAG	162	2	50	1
11-qE1-9443.1	Murine-specific	5-qG2-950.1	Murine-specific	chr11:103447069-103447097:+	TACAGAGTGAGTTCTAGGACAGTGAGAC	chr5:136936254-136936294:-	TACAGAGTGAGATTCAGGCCAGCCTAGGCAACTCAGTAAG	86	1	50	1
11-qE1-9443.1	Murine-specific	5-qG2-950.1	Murine-specific	chr11:103447069-103447098:+	TACAGAGTGAGTTCTAGGACAGTGAGACT	chr5:136936254-136936294:-	TACAGAGTGAGATTCAGGCCAGCCTAGGCAACTCAGTAAG	82	1	50	1
11-qE1-9443.1	Murine-specific	5-qG2-950.1	Murine-specific	chr11:103447069-103447099:+	TACAGAGTGAGTTCTAGGACAGTGAGACTC	chr5:136936254-136936294:-	TACAGAGTGAGATTCAGGCCAGCCTAGGCAACTCAGTAAG	703	1	50	1
9-qC-10667.1	Eutherian	5-qG2-950.1	Murine-specific	chr9:67754231-67754259:+	TACAGAGTGAGTTCCAGGACAGCCATAC	chr5:136936254-136936294:-	TACAGAGTGAGATTCAGGCCAGCCTAGGCAACTCAGTAAG	185	3	50	1
9-qC-10667.1	Eutherian	5-qG2-950.1	Murine-specific	chr9:67754231-67754260:+	TACAGAGTGAGTTCCAGGACAGCCATACA	chr5:136936254-136936294:-	TACAGAGTGAGATTCAGGCCAGCCTAGGCAACTCAGTAAG	834	2	50	1
9-qC-10667.1	Eutherian	5-qG2-950.1	Murine-specific	chr9:67754231-67754261:+	TACAGAGTGAGTTCCAGGACAGCCATACAG	chr5:136936254-136936294:-	TACAGAGTGAGATTCAGGCCAGCCTAGGCAACTCAGTAAG	83	1	50	1
14-qA3-3095.1	Mouse-specific	5-qF-14224.1	Eutherian	chr14:19649323-19649353:-	ACATATAGAATAGTCTACCATCCCATGGAA	chr5:113350151-113350191:-	ACATATAGAAGAGTCTACCAGACCGTGGCGTTCCCCTGTG	60	1	26	1
14-qA3-3095.1	Mouse-specific	5-qF-14224.1	Eutherian	chr14:19649324-19649353:-	ACATATAGAATAGTCTACCATCCCATGGA	chr5:113350151-113350191:-	ACATATAGAAGAGTCTACCAGACCGTGGCGTTCCCCTGTG	97	1	26	1
14-qA3-3095.1	Mouse-specific	5-qF-14224.1	Eutherian	chr14:19649328-19649353:-	ACATATAGAATAGTCTACCATCCCA	chr5:113350151-113350191:-	ACATATAGAAGAGTCTACCAGACCGTGGCGTTCCCCTGTG	31	1	26	1
14-qC1-1261.1	Mouse-specific	5-qF-14224.1	Eutherian	chr14:44786900-44786929:-	ACATATAGAATAGTCTAACAGCCCATGGA	chr5:113350151-113350191:-	ACATATAGAAGAGTCTACCAGACCGTGGCGTTCCCCTGTG	320	2	26	1
14-qC1-1010.1	Mouse-specific	5-qF-14224.1	Eutherian	chr14:44929835-44929864:+	ACATATAGAATAGTCTAACAGCCCATGGA	chr5:113350151-113350191:-	ACATATAGAAGAGTCTACCAGACCGTGGCGTTCCCCTGTG	320	2	26	1
7-qB5-6255.1	Mouse-specific	7-qB5-6255.1	Mouse-specific	chr7:52908184-52908209:+	TTCTGGATTTGACTGTCAGCTTGAG	chr7:52908712-52908752:-	TTCTGGATATGTCTGTGAGTTGACTGCAAAACAATTTTTA	34	1	46	1
7-qB5-6255.1	Mouse-specific	7-qB5-6255.1	Mouse-specific	chr7:52908184-52908210:+	TTCTGGATTTGACTGTCAGCTTGAGT	chr7:52908712-52908752:-	TTCTGGATATGTCTGTGAGTTGACTGCAAAACAATTTTTA	102	1	46	1
7-qB5-6255.1	Mouse-specific	7-qB5-6255.1	Mouse-specific	chr7:52908184-52908211:+	TTCTGGATTTGACTGTCAGCTTGAGTG	chr7:52908712-52908752:-	TTCTGGATATGTCTGTGAGTTGACTGCAAAACAATTTTTA	61	1	46	1
7-qB5-6255.1	Mouse-specific	7-qB5-6255.1	Mouse-specific	chr7:52908184-52908213:+	TTCTGGATTTGACTGTCAGCTTGAGTGGA	chr7:52908712-52908752:-	TTCTGGATATGTCTGTGAGTTGACTGCAAAACAATTTTTA	305	1	46	1
7-qB5-6255.1	Mouse-specific	7-qB5-6255.1	Mouse-specific	chr7:52908184-52908213:+	TTCTGGATTTGACTGTCAGCTTGAGTGGT	chr7:52908712-52908752:-	TTCTGGATATGTCTGTGAGTTGACTGCAAAACAATTTTTA	33	1	46	1
7-qB5-6255.1	Mouse-specific	7-qB5-6255.1	Mouse-specific	chr7:52908184-52908214:+	TTCTGGATTTGACTGTCAGCTTGAGTGGAT	chr7:52908712-52908752:-	TTCTGGATATGTCTGTGAGTTGACTGCAAAACAATTTTTA	344	1	46	1
7-qB5-6255.1	Mouse-specific	7-qB5-6255.1	Mouse-specific	chr7:52908224-52908249:+	TTCTGGATTTGACTGTGAGCTGATT	chr7:52908712-52908752:-	TTCTGGATATGTCTGTGAGTTGACTGCAAAACAATTTTTA	63	1	46	1
7-qB5-6255.1	Mouse-specific	7-qB5-6255.1	Mouse-specific	chr7:52908224-52908250:+	TTCTGGATTTGACTGTGAGCTGATTA	chr7:52908712-52908752:-	TTCTGGATATGTCTGTGAGTTGACTGCAAAACAATTTTTA	48	1	46	1
9-qC-31469.1	Murine-specific	9-qC-31469.1	Murine-specific	chr9:67716771-67716803:-	TTGTATTGCATTAGGTTAAATGTTGTAGCTCT	chr9:67716074-67716114:+	TTGTATTGCATTAGGTTAACATTGATTCTTTCTTGATTTT	71	1	65	1
9-qC-31469.1	Murine-specific	9-qC-31469.1	Murine-specific	chr9:67716772-67716803:-	TTGTATTGCATTAGGTTAAATGTTGTAGCTT	chr9:67716074-67716114:+	TTGTATTGCATTAGGTTAACATTGATTCTTTCTTGATTTT	54	1	65	1
9-qC-31469.1	Murine-specific	9-qC-31469.1	Murine-specific	chr9:67716772-67716803:-	TTGTATTGCATTAGGTTAAATGTTGTAGCTC	chr9:67716074-67716114:+	TTGTATTGCATTAGGTTAACATTGATTCTTTCTTGATTTT	69	1	65	1
9-qC-31469.1	Murine-specific	9-qC-31469.1	Murine-specific	chr9:67716773-67716803:-	TTGTATTGCATTAGGTTAAATGTTGTAGCT	chr9:67716074-67716114:+	TTGTATTGCATTAGGTTAACATTGATTCTTTCTTGATTTT	1059	1	65	1
9-qC-31469.1	Murine-specific	9-qC-31469.1	Murine-specific	chr9:67716774-67716803:-	TTGTATTGCATTAGGTTAAATGTTGTAGC	chr9:67716074-67716114:+	TTGTATTGCATTAGGTTAACATTGATTCTTTCTTGATTTT	51	1	65	1
10-qB4-6488.1	Murine-specific	6-qC3-6258.1	Murine-specific	chr10:62676286-62676316:+	TTTAATCCCAGTTCTCGGGAGTTTGAGAGC	chr6:81896341-81896381:+	TTTAATCCCAGCACTCCGGAGGCAGAGGCAGGCGGATCTC	40	1	109	1
10-qB4-6488.1	Murine-specific	6-qC3-6258.1	Murine-specific	chr10:62688647-62688673:+	TTTAATCTTAGCACTGGGGAGACTGA	chr6:81896341-81896381:+	TTTAATCCCAGCACTCCGGAGGCAGAGGCAGGCGGATCTC	42	1	109	1
10-qB4-6488.1	Murine-specific	6-qC3-6258.1	Murine-specific	chr10:62688647-62688675:+	TTTAATCTTAGCACTGGGGAGACTGAGT	chr6:81896341-81896381:+	TTTAATCCCAGCACTCCGGAGGCAGAGGCAGGCGGATCTC	47	1	109	1
10-qB4-6488.1	Murine-specific	6-qC3-6258.1	Murine-specific	chr10:62688647-62688675:+	TTTAATCTTAGCACTGGGGAGACTGAGA	chr6:81896341-81896381:+	TTTAATCCCAGCACTCCGGAGGCAGAGGCAGGCGGATCTC	75	1	109	1
10-qB4-6488.1	Murine-specific	6-qC3-6258.1	Murine-specific	chr10:62688647-62688676:+	TTTAATCTTAGCACTGGGGAGACTGAGAT	chr6:81896341-81896381:+	TTTAATCCCAGCACTCCGGAGGCAGAGGCAGGCGGATCTC	181	1	109	1
15-qD3-14639.1	Murine-specific	6-qC3-6258.1	Murine-specific	chr15:74657262-74657288:+	TTTAATCACAGCACTAGGGAAACAGA	chr6:81896341-81896381:+	TTTAATCCCAGCACTCCGGAGGCAGAGGCAGGCGGATCTC	65	2	109	1
15-qD3-14639.1	Murine-specific	6-qC3-6258.1	Murine-specific	chr15:74657262-74657289:+	TTTAATCACAGCACTAGGGAAACAGAA	chr6:81896341-81896381:+	TTTAATCCCAGCACTCCGGAGGCAGAGGCAGGCGGATCTC	149	1	109	1
15-qD3-14639.1	Murine-specific	6-qC3-6258.1	Murine-specific	chr15:74657262-74657290:+	TTTAATCACAGCACTAGGGAAACAGAAG	chr6:81896341-81896381:+	TTTAATCCCAGCACTCCGGAGGCAGAGGCAGGCGGATCTC	378	1	109	1
15-qD3-14639.1	Murine-specific	6-qC3-6258.1	Murine-specific	chr15:74657262-74657291:+	TTTAATCACAGCACTAGGGAAACAGAAGC	chr6:81896341-81896381:+	TTTAATCCCAGCACTCCGGAGGCAGAGGCAGGCGGATCTC	1836	1	109	1
15-qD3-14639.1	Murine-specific	6-qC3-6258.1	Murine-specific	chr15:74657262-74657291:+	TTTAATCACAGCACTAGGGAAACAGAAGT	chr6:81896341-81896381:+	TTTAATCCCAGCACTCCGGAGGCAGAGGCAGGCGGATCTC	81	1	109	1
15-qD3-14639.1	Murine-specific	6-qC3-6258.1	Murine-specific	chr15:74657262-74657292:+	TTTAATCACAGCACTAGGGAAACAGAAGCT	chr6:81896341-81896381:+	TTTAATCCCAGCACTCCGGAGGCAGAGGCAGGCGGATCTC	1523	1	109	1
15-qD3-14639.1	Murine-specific	6-qC3-6258.1	Murine-specific	chr15:74657262-74657293:+	TTTAATCACAGCACTAGGGAAACAGAAGCTT	chr6:81896341-81896381:+	TTTAATCCCAGCACTCCGGAGGCAGAGGCAGGCGGATCTC	195	1	109	1
17-qA3.3-27363.1	Eutherian	6-qC3-6258.1	Murine-specific	chr17:27297330-27297360:-	TTTAATCCCAGCACTCACGCAGAAAAGGCA	chr6:81896341-81896381:+	TTTAATCCCAGCACTCCGGAGGCAGAGGCAGGCGGATCTC	34	1	109	1
5-qF-14224.1	Eutherian	6-qC3-6258.1	Murine-specific	chr5:113343582-113343610:+	TTTAATCCCAGCTCTTGGGAGGCGGAGG	chr6:81896341-81896381:+	TTTAATCCCAGCACTCCGGAGGCAGAGGCAGGCGGATCTC	253	4	109	1
5-qF-14224.1	Eutherian	6-qC3-6258.1	Murine-specific	chr5:113343582-113343611:+	TTTAATCCCAGCTCTTGGGAGGCGGAGGC	chr6:81896341-81896381:+	TTTAATCCCAGCACTCCGGAGGCAGAGGCAGGCGGATCTC	174	4	109	1
9-qA5.3-1495.1	Murine-specific	6-qC3-6258.1	Murine-specific	chr9:54249982-54250008:+	TTTAATCTCAGCACCGTGGAGGCAGA	chr6:81896341-81896381:+	TTTAATCCCAGCACTCCGGAGGCAGAGGCAGGCGGATCTC	47	1	109	1
9-qA5.3-1495.1	Murine-specific	6-qC3-6258.1	Murine-specific	chr9:54249982-54250011:+	TTTAATCTCAGCACCGTGGAGGCAGAGGC	chr6:81896341-81896381:+	TTTAATCCCAGCACTCCGGAGGCAGAGGCAGGCGGATCTC	60	1	109	1
9-qA5.3-1495.1	Murine-specific	6-qC3-6258.1	Murine-specific	chr9:54249982-54250012:+	TTTAATCTCAGCACCGTGGAGGCAGAGGCT	chr6:81896341-81896381:+	TTTAATCCCAGCACTCCGGAGGCAGAGGCAGGCGGATCTC	41	1	109	1
18-qE1-1295.1	Mouse-specific	17-qE1.1-7037.1	Mouse-specific	chr18:67074045-67074073:+	TTGATGATAGTAGACTGATCCTCAGAAC	chr17:66218095-66218135:-	TTGATGATAATGGACTGAACCTCTGAGCCTGTAAGCCAGC	33	1	21	1
18-qE1-1295.1	Mouse-specific	17-qE1.1-7037.1	Mouse-specific	chr18:67074045-67074074:+	TTGATGATAGTAGACTGATCCTCAGAACC	chr17:66218095-66218135:-	TTGATGATAATGGACTGAACCTCTGAGCCTGTAAGCCAGC	196	1	21	1
18-qE1-1295.1	Mouse-specific	17-qE1.1-7037.1	Mouse-specific	chr18:67074045-67074074:+	TTGATGATAGTAGACTGATCCTCAGAACT	chr17:66218095-66218135:-	TTGATGATAATGGACTGAACCTCTGAGCCTGTAAGCCAGC	36	1	21	1
18-qE1-1295.1	Mouse-specific	17-qE1.1-7037.1	Mouse-specific	chr18:67074045-67074075:+	TTGATGATAGTAGACTGATCCTCAGAACCT	chr17:66218095-66218135:-	TTGATGATAATGGACTGAACCTCTGAGCCTGTAAGCCAGC	1279	1	21	1
17-qE1.1-7037.1	Mouse-specific	3-qA3-2052.1	Eutherian	chr17:66224335-66224363:+	TTCTCAATTAGTGATTGAGGTGGATAGG	chr3:34878233-34878273:-	TTCTCAATTAGTGATCAAGGGGGAAAGGCCCCTTGTGGGT	214	1	44	1
17-qE1.1-7037.1	Mouse-specific	3-qA3-2052.1	Eutherian	chr17:66224335-66224364:+	TTCTCAATTAGTGATTGAGGTGGATAGGA	chr3:34878233-34878273:-	TTCTCAATTAGTGATCAAGGGGGAAAGGCCCCTTGTGGGT	241	1	44	1
17-qE1.1-7037.1	Mouse-specific	3-qA3-2052.1	Eutherian	chr17:66224335-66224364:+	TTCTCAATTAGTGATTGAGGTGGATAGGT	chr3:34878233-34878273:-	TTCTCAATTAGTGATCAAGGGGGAAAGGCCCCTTGTGGGT	34	1	44	1
9-qC-31469.1	Murine-specific	11-qE1-9443.1	Murine-specific	chr9:67709213-67709243:-	TTACCATATGGAAAGGTGGGAGATATCGGA	chr11:103433972-103434012:-	TTACCATATGAAAAGATGGAGGAACAGGGCTTCCGTGGGA	40	1	39	1
10-qB4-6488.1	Murine-specific	14-qA3-19970.1	Murine-specific	chr10:62676286-62676316:+	TTTAATCCCAGTTCTCGGGAGTTTGAGAGC	chr14:24097807-24097847:-	TTTAATCCCAGCACTTGGGAGGCAGAGGCAGGCAGATTTC	40	1	18	1
10-qB4-6488.1	Murine-specific	14-qA3-19970.1	Murine-specific	chr10:62688647-62688673:+	TTTAATCTTAGCACTGGGGAGACTGA	chr14:24097807-24097847:-	TTTAATCCCAGCACTTGGGAGGCAGAGGCAGGCAGATTTC	42	1	18	1
10-qB4-6488.1	Murine-specific	14-qA3-19970.1	Murine-specific	chr10:62688647-62688675:+	TTTAATCTTAGCACTGGGGAGACTGAGT	chr14:24097807-24097847:-	TTTAATCCCAGCACTTGGGAGGCAGAGGCAGGCAGATTTC	47	1	18	1
10-qB4-6488.1	Murine-specific	14-qA3-19970.1	Murine-specific	chr10:62688647-62688675:+	TTTAATCTTAGCACTGGGGAGACTGAGA	chr14:24097807-24097847:-	TTTAATCCCAGCACTTGGGAGGCAGAGGCAGGCAGATTTC	75	1	18	1
10-qB4-6488.1	Murine-specific	14-qA3-19970.1	Murine-specific	chr10:62688647-62688676:+	TTTAATCTTAGCACTGGGGAGACTGAGAT	chr14:24097807-24097847:-	TTTAATCCCAGCACTTGGGAGGCAGAGGCAGGCAGATTTC	181	1	18	1
15-qD3-14639.1	Murine-specific	14-qA3-19970.1	Murine-specific	chr15:74657262-74657288:+	TTTAATCACAGCACTAGGGAAACAGA	chr14:24097807-24097847:-	TTTAATCCCAGCACTTGGGAGGCAGAGGCAGGCAGATTTC	65	2	18	1
15-qD3-14639.1	Murine-specific	14-qA3-19970.1	Murine-specific	chr15:74657262-74657289:+	TTTAATCACAGCACTAGGGAAACAGAA	chr14:24097807-24097847:-	TTTAATCCCAGCACTTGGGAGGCAGAGGCAGGCAGATTTC	149	1	18	1
15-qD3-14639.1	Murine-specific	14-qA3-19970.1	Murine-specific	chr15:74657262-74657290:+	TTTAATCACAGCACTAGGGAAACAGAAG	chr14:24097807-24097847:-	TTTAATCCCAGCACTTGGGAGGCAGAGGCAGGCAGATTTC	378	1	18	1
15-qD3-14639.1	Murine-specific	14-qA3-19970.1	Murine-specific	chr15:74657262-74657291:+	TTTAATCACAGCACTAGGGAAACAGAAGC	chr14:24097807-24097847:-	TTTAATCCCAGCACTTGGGAGGCAGAGGCAGGCAGATTTC	1836	1	18	1
15-qD3-14639.1	Murine-specific	14-qA3-19970.1	Murine-specific	chr15:74657262-74657291:+	TTTAATCACAGCACTAGGGAAACAGAAGT	chr14:24097807-24097847:-	TTTAATCCCAGCACTTGGGAGGCAGAGGCAGGCAGATTTC	81	1	18	1
15-qD3-14639.1	Murine-specific	14-qA3-19970.1	Murine-specific	chr15:74657262-74657292:+	TTTAATCACAGCACTAGGGAAACAGAAGCT	chr14:24097807-24097847:-	TTTAATCCCAGCACTTGGGAGGCAGAGGCAGGCAGATTTC	1523	1	18	1
15-qD3-14639.1	Murine-specific	14-qA3-19970.1	Murine-specific	chr15:74657262-74657293:+	TTTAATCACAGCACTAGGGAAACAGAAGCTT	chr14:24097807-24097847:-	TTTAATCCCAGCACTTGGGAGGCAGAGGCAGGCAGATTTC	195	1	18	1
5-qF-14224.1	Eutherian	14-qA3-19970.1	Murine-specific	chr5:113343582-113343610:+	TTTAATCCCAGCTCTTGGGAGGCGGAGG	chr14:24097807-24097847:-	TTTAATCCCAGCACTTGGGAGGCAGAGGCAGGCAGATTTC	253	4	18	1
5-qF-14224.1	Eutherian	14-qA3-19970.1	Murine-specific	chr5:113343582-113343611:+	TTTAATCCCAGCTCTTGGGAGGCGGAGGC	chr14:24097807-24097847:-	TTTAATCCCAGCACTTGGGAGGCAGAGGCAGGCAGATTTC	174	4	18	1
9-qA5.3-1495.1	Murine-specific	14-qA3-19970.1	Murine-specific	chr9:54249982-54250008:+	TTTAATCTCAGCACCGTGGAGGCAGA	chr14:24097807-24097847:-	TTTAATCCCAGCACTTGGGAGGCAGAGGCAGGCAGATTTC	47	1	18	1
9-qA5.3-1495.1	Murine-specific	14-qA3-19970.1	Murine-specific	chr9:54249982-54250011:+	TTTAATCTCAGCACCGTGGAGGCAGAGGC	chr14:24097807-24097847:-	TTTAATCCCAGCACTTGGGAGGCAGAGGCAGGCAGATTTC	60	1	18	1
9-qA5.3-1495.1	Murine-specific	14-qA3-19970.1	Murine-specific	chr9:54249982-54250012:+	TTTAATCTCAGCACCGTGGAGGCAGAGGCT	chr14:24097807-24097847:-	TTTAATCCCAGCACTTGGGAGGCAGAGGCAGGCAGATTTC	41	1	18	1
7-qD2-24830.1	Eutherian	12-qE-7089.1	Eutherian	chr7:73815032-73815062:-	TATTGAATGCCAGGGAGACTGTAGTCCTTT	chr12:98451807-98451847:-	TATTGAATGCCAGGAAGCCTGGAGAACGGGGCCCAGACCA	39	1	48	1
7-qD2-24830.1	Eutherian	12-qE-7089.1	Eutherian	chr7:73815033-73815062:-	TATTGAATGCCAGGGAGACTGTAGTCCTT	chr12:98451807-98451847:-	TATTGAATGCCAGGAAGCCTGGAGAACGGGGCCCAGACCA	250	1	48	1
7-qD2-24830.1	Eutherian	12-qE-7089.1	Eutherian	chr7:73815034-73815062:-	TATTGAATGCCAGGGAGACTGTAGTCCT	chr12:98451807-98451847:-	TATTGAATGCCAGGAAGCCTGGAGAACGGGGCCCAGACCA	38	1	48	1
7-qD2-24830.1	Eutherian	12-qE-7089.1	Eutherian	chr7:73815035-73815062:-	TATTGAATGCCAGGGAGACTGTAGTCC	chr12:98451807-98451847:-	TATTGAATGCCAGGAAGCCTGGAGAACGGGGCCCAGACCA	59	1	48	1
10-qB4-6488.1	Murine-specific	15-qE1-1119.1	Mouse-specific	chr10:62676286-62676316:+	TTTAATCCCAGTTCTCGGGAGTTTGAGAGC	chr15:79939875-79939915:-	TTTAATCCCAGCACTCGGGAGGCAGAGGCAGGCGGATTTC	40	1	55	1
10-qB4-6488.1	Murine-specific	15-qE1-1119.1	Mouse-specific	chr10:62688647-62688673:+	TTTAATCTTAGCACTGGGGAGACTGA	chr15:79939875-79939915:-	TTTAATCCCAGCACTCGGGAGGCAGAGGCAGGCGGATTTC	42	1	55	1
10-qB4-6488.1	Murine-specific	15-qE1-1119.1	Mouse-specific	chr10:62688647-62688675:+	TTTAATCTTAGCACTGGGGAGACTGAGT	chr15:79939875-79939915:-	TTTAATCCCAGCACTCGGGAGGCAGAGGCAGGCGGATTTC	47	1	55	1
10-qB4-6488.1	Murine-specific	15-qE1-1119.1	Mouse-specific	chr10:62688647-62688675:+	TTTAATCTTAGCACTGGGGAGACTGAGA	chr15:79939875-79939915:-	TTTAATCCCAGCACTCGGGAGGCAGAGGCAGGCGGATTTC	75	1	55	1
10-qB4-6488.1	Murine-specific	15-qE1-1119.1	Mouse-specific	chr10:62688647-62688676:+	TTTAATCTTAGCACTGGGGAGACTGAGAT	chr15:79939875-79939915:-	TTTAATCCCAGCACTCGGGAGGCAGAGGCAGGCGGATTTC	181	1	55	1
11-qE1-9443.1	Murine-specific	15-qE1-1119.1	Mouse-specific	chr11:103447005-103447031:+	TTTAATCCCAGGACCCGGAAAGCAAA	chr15:79939875-79939915:-	TTTAATCCCAGCACTCGGGAGGCAGAGGCAGGCGGATTTC	55	1	55	1
11-qE1-9443.1	Murine-specific	15-qE1-1119.1	Mouse-specific	chr11:103447005-103447032:+	TTTAATCCCAGGACCCGGAAAGCAAAG	chr15:79939875-79939915:-	TTTAATCCCAGCACTCGGGAGGCAGAGGCAGGCGGATTTC	72	1	55	1
11-qE1-9443.1	Murine-specific	15-qE1-1119.1	Mouse-specific	chr11:103447005-103447033:+	TTTAATCCCAGGACCCGGAAAGCAAAGG	chr15:79939875-79939915:-	TTTAATCCCAGCACTCGGGAGGCAGAGGCAGGCGGATTTC	61	1	55	1
11-qE1-9443.1	Murine-specific	15-qE1-1119.1	Mouse-specific	chr11:103447005-103447033:+	TTTAATCCCAGGACCCGGAAAGCAAAGT	chr15:79939875-79939915:-	TTTAATCCCAGCACTCGGGAGGCAGAGGCAGGCGGATTTC	63	1	55	1
11-qE1-9443.1	Murine-specific	15-qE1-1119.1	Mouse-specific	chr11:103447005-103447034:+	TTTAATCCCAGGACCCGGAAAGCAAAGGC	chr15:79939875-79939915:-	TTTAATCCCAGCACTCGGGAGGCAGAGGCAGGCGGATTTC	348	1	55	1
11-qE1-9443.1	Murine-specific	15-qE1-1119.1	Mouse-specific	chr11:103447005-103447035:+	TTTAATCCCAGGACCCGGAAAGCAAAGGCA	chr15:79939875-79939915:-	TTTAATCCCAGCACTCGGGAGGCAGAGGCAGGCGGATTTC	192	1	55	1
11-qE1-9443.1	Murine-specific	15-qE1-1119.1	Mouse-specific	chr11:103447005-103447036:+	TTTAATCCCAGGACCCGGAAAGCAAAGGCAG	chr15:79939875-79939915:-	TTTAATCCCAGCACTCGGGAGGCAGAGGCAGGCGGATTTC	53	1	55	1
11-qE1-9443.1	Murine-specific	15-qE1-1119.1	Mouse-specific	chr11:103447005-103447037:+	TTTAATCCCAGGACCCGGAAAGCAAAGGCAGT	chr15:79939875-79939915:-	TTTAATCCCAGCACTCGGGAGGCAGAGGCAGGCGGATTTC	33	1	55	1
15-qD3-14639.1	Murine-specific	15-qE1-1119.1	Mouse-specific	chr15:74657262-74657288:+	TTTAATCACAGCACTAGGGAAACAGA	chr15:79939875-79939915:-	TTTAATCCCAGCACTCGGGAGGCAGAGGCAGGCGGATTTC	65	2	55	1
15-qD3-14639.1	Murine-specific	15-qE1-1119.1	Mouse-specific	chr15:74657262-74657289:+	TTTAATCACAGCACTAGGGAAACAGAA	chr15:79939875-79939915:-	TTTAATCCCAGCACTCGGGAGGCAGAGGCAGGCGGATTTC	149	1	55	1
15-qD3-14639.1	Murine-specific	15-qE1-1119.1	Mouse-specific	chr15:74657262-74657290:+	TTTAATCACAGCACTAGGGAAACAGAAG	chr15:79939875-79939915:-	TTTAATCCCAGCACTCGGGAGGCAGAGGCAGGCGGATTTC	378	1	55	1
15-qD3-14639.1	Murine-specific	15-qE1-1119.1	Mouse-specific	chr15:74657262-74657291:+	TTTAATCACAGCACTAGGGAAACAGAAGC	chr15:79939875-79939915:-	TTTAATCCCAGCACTCGGGAGGCAGAGGCAGGCGGATTTC	1836	1	55	1
15-qD3-14639.1	Murine-specific	15-qE1-1119.1	Mouse-specific	chr15:74657262-74657291:+	TTTAATCACAGCACTAGGGAAACAGAAGT	chr15:79939875-79939915:-	TTTAATCCCAGCACTCGGGAGGCAGAGGCAGGCGGATTTC	81	1	55	1
15-qD3-14639.1	Murine-specific	15-qE1-1119.1	Mouse-specific	chr15:74657262-74657292:+	TTTAATCACAGCACTAGGGAAACAGAAGCT	chr15:79939875-79939915:-	TTTAATCCCAGCACTCGGGAGGCAGAGGCAGGCGGATTTC	1523	1	55	1
15-qD3-14639.1	Murine-specific	15-qE1-1119.1	Mouse-specific	chr15:74657262-74657293:+	TTTAATCACAGCACTAGGGAAACAGAAGCTT	chr15:79939875-79939915:-	TTTAATCCCAGCACTCGGGAGGCAGAGGCAGGCGGATTTC	195	1	55	1
17-qA3.3-27363.1	Eutherian	15-qE1-1119.1	Mouse-specific	chr17:27297330-27297360:-	TTTAATCCCAGCACTCACGCAGAAAAGGCA	chr15:79939875-79939915:-	TTTAATCCCAGCACTCGGGAGGCAGAGGCAGGCGGATTTC	34	1	55	1
5-qF-14224.1	Eutherian	15-qE1-1119.1	Mouse-specific	chr5:113343582-113343610:+	TTTAATCCCAGCTCTTGGGAGGCGGAGG	chr15:79939875-79939915:-	TTTAATCCCAGCACTCGGGAGGCAGAGGCAGGCGGATTTC	253	4	55	1
5-qF-14224.1	Eutherian	15-qE1-1119.1	Mouse-specific	chr5:113343582-113343611:+	TTTAATCCCAGCTCTTGGGAGGCGGAGGC	chr15:79939875-79939915:-	TTTAATCCCAGCACTCGGGAGGCAGAGGCAGGCGGATTTC	174	4	55	1
9-qA5.3-1495.1	Murine-specific	15-qE1-1119.1	Mouse-specific	chr9:54249982-54250008:+	TTTAATCTCAGCACCGTGGAGGCAGA	chr15:79939875-79939915:-	TTTAATCCCAGCACTCGGGAGGCAGAGGCAGGCGGATTTC	47	1	55	1
9-qA5.3-1495.1	Murine-specific	15-qE1-1119.1	Mouse-specific	chr9:54249982-54250011:+	TTTAATCTCAGCACCGTGGAGGCAGAGGC	chr15:79939875-79939915:-	TTTAATCCCAGCACTCGGGAGGCAGAGGCAGGCGGATTTC	60	1	55	1
9-qA5.3-1495.1	Murine-specific	15-qE1-1119.1	Mouse-specific	chr9:54249982-54250012:+	TTTAATCTCAGCACCGTGGAGGCAGAGGCT	chr15:79939875-79939915:-	TTTAATCCCAGCACTCGGGAGGCAGAGGCAGGCGGATTTC	41	1	55	1
9-qA5.3-24188.1	Eutherian	2-qG3-1029.1	Murine-specific	chr9:54240095-54240120:-	TAGTATGATGGCTCTGCAATTGCCT	chr2:151151794-151151834:-	GAGTATGATGGCCATGCAATGGATCTCTGGACCTTGGGGG	37	1	14	1
7-qD2-24830.1	Eutherian	5-qG3-23659.1	Eutherian	chr7:73795028-73795056:-	TGCTAGCAGAGTTACCCAGGTCGGTTCT	chr5:149813745-149813785:+	AGCTAGCAGAACTATCCAAGTGCCCCCCCCCCAGGGGCCT	57	1	20	1
7-qD2-24830.1	Eutherian	5-qG3-23659.1	Eutherian	chr7:73795029-73795056:-	TGCTAGCAGAGTTACCCAGGTCGGTTC	chr5:149813745-149813785:+	AGCTAGCAGAACTATCCAAGTGCCCCCCCCCCAGGGGCCT	151	1	20	1
7-qD2-24830.1	Eutherian	5-qG3-23659.1	Eutherian	chr7:73795030-73795056:-	TGCTAGCAGAGTTACCCAGGTCGGTT	chr5:149813745-149813785:+	AGCTAGCAGAACTATCCAAGTGCCCCCCCCCCAGGGGCCT	181	1	20	1
7-qD2-24830.1	Eutherian	5-qG3-23659.1	Eutherian	chr7:73795032-73795056:-	TGCTAGCAGAGTTACCCAGGTCGG	chr5:149813745-149813785:+	AGCTAGCAGAACTATCCAAGTGCCCCCCCCCCAGGGGCCT	112	1	20	1
2-qF1-2536.1	Murine-specific	15-qE1-1119.1	Mouse-specific	chr2:127702228-127702257:+	TTCCTTTGTAACTCCACTGTCAGGACCAT	chr15:79930539-79930579:-	GTCCTTTGTGTGTCCCCTGTCTGTCATCCTCTCACCAGGC	38	1	18	1
14-qA3-2286.1	Mouse-specific	8-qE1-3748.1	Murine-specific	chr14:24355975-24356007:-	TGGAACTAGAGAATATCCTTTTGGCAAAATGT	chr8:110125745-110125785:-	TGGAACTAGAAAATATCATCCTGAGTAAGGTAACCCAATC	41	1	47	1
11-qE1-9443.1	Murine-specific	7-qF3-246.1	Murine-specific	chr11:103426769-103426798:+	TGCTGTGAACAGACACCGTGCCCAAGGCA	chr7:125363249-125363289:-	TGCTGTGAAGAGACACTGTGATCAAAGGAACATATAATGA	38	1	30	1
11-qE1-9443.1	Murine-specific	7-qF3-246.1	Murine-specific	chr11:103426769-103426799:+	TGCTGTGAACAGACACCGTGCCCAAGGCAA	chr7:125363249-125363289:-	TGCTGTGAAGAGACACTGTGATCAAAGGAACATATAATGA	111	1	30	1
10-qB4-6488.1	Murine-specific	10-qB5.1-221.1	Mouse-specific	chr10:62676286-62676316:+	TTTAATCCCAGTTCTCGGGAGTTTGAGAGC	chr10:66708335-66708375:-	TTTAATCTCAGCACTTGGGAGGCAGAGGCAGGCAGATTCT	40	1	18	1
10-qB4-6488.1	Murine-specific	10-qB5.1-221.1	Mouse-specific	chr10:62688647-62688673:+	TTTAATCTTAGCACTGGGGAGACTGA	chr10:66708335-66708375:-	TTTAATCTCAGCACTTGGGAGGCAGAGGCAGGCAGATTCT	42	1	18	1
10-qB4-6488.1	Murine-specific	10-qB5.1-221.1	Mouse-specific	chr10:62688647-62688675:+	TTTAATCTTAGCACTGGGGAGACTGAGT	chr10:66708335-66708375:-	TTTAATCTCAGCACTTGGGAGGCAGAGGCAGGCAGATTCT	47	1	18	1
10-qB4-6488.1	Murine-specific	10-qB5.1-221.1	Mouse-specific	chr10:62688647-62688675:+	TTTAATCTTAGCACTGGGGAGACTGAGA	chr10:66708335-66708375:-	TTTAATCTCAGCACTTGGGAGGCAGAGGCAGGCAGATTCT	75	1	18	1
10-qB4-6488.1	Murine-specific	10-qB5.1-221.1	Mouse-specific	chr10:62688647-62688676:+	TTTAATCTTAGCACTGGGGAGACTGAGAT	chr10:66708335-66708375:-	TTTAATCTCAGCACTTGGGAGGCAGAGGCAGGCAGATTCT	181	1	18	1
15-qD3-14639.1	Murine-specific	10-qB5.1-221.1	Mouse-specific	chr15:74657262-74657288:+	TTTAATCACAGCACTAGGGAAACAGA	chr10:66708335-66708375:-	TTTAATCTCAGCACTTGGGAGGCAGAGGCAGGCAGATTCT	65	2	18	1
15-qD3-14639.1	Murine-specific	10-qB5.1-221.1	Mouse-specific	chr15:74657262-74657289:+	TTTAATCACAGCACTAGGGAAACAGAA	chr10:66708335-66708375:-	TTTAATCTCAGCACTTGGGAGGCAGAGGCAGGCAGATTCT	149	1	18	1
15-qD3-14639.1	Murine-specific	10-qB5.1-221.1	Mouse-specific	chr15:74657262-74657290:+	TTTAATCACAGCACTAGGGAAACAGAAG	chr10:66708335-66708375:-	TTTAATCTCAGCACTTGGGAGGCAGAGGCAGGCAGATTCT	378	1	18	1
15-qD3-14639.1	Murine-specific	10-qB5.1-221.1	Mouse-specific	chr15:74657262-74657291:+	TTTAATCACAGCACTAGGGAAACAGAAGC	chr10:66708335-66708375:-	TTTAATCTCAGCACTTGGGAGGCAGAGGCAGGCAGATTCT	1836	1	18	1
15-qD3-14639.1	Murine-specific	10-qB5.1-221.1	Mouse-specific	chr15:74657262-74657291:+	TTTAATCACAGCACTAGGGAAACAGAAGT	chr10:66708335-66708375:-	TTTAATCTCAGCACTTGGGAGGCAGAGGCAGGCAGATTCT	81	1	18	1
15-qD3-14639.1	Murine-specific	10-qB5.1-221.1	Mouse-specific	chr15:74657262-74657292:+	TTTAATCACAGCACTAGGGAAACAGAAGCT	chr10:66708335-66708375:-	TTTAATCTCAGCACTTGGGAGGCAGAGGCAGGCAGATTCT	1523	1	18	1
15-qD3-14639.1	Murine-specific	10-qB5.1-221.1	Mouse-specific	chr15:74657262-74657293:+	TTTAATCACAGCACTAGGGAAACAGAAGCTT	chr10:66708335-66708375:-	TTTAATCTCAGCACTTGGGAGGCAGAGGCAGGCAGATTCT	195	1	18	1
5-qF-14224.1	Eutherian	10-qB5.1-221.1	Mouse-specific	chr5:113343582-113343610:+	TTTAATCCCAGCTCTTGGGAGGCGGAGG	chr10:66708335-66708375:-	TTTAATCTCAGCACTTGGGAGGCAGAGGCAGGCAGATTCT	253	4	18	1
5-qF-14224.1	Eutherian	10-qB5.1-221.1	Mouse-specific	chr5:113343582-113343611:+	TTTAATCCCAGCTCTTGGGAGGCGGAGGC	chr10:66708335-66708375:-	TTTAATCTCAGCACTTGGGAGGCAGAGGCAGGCAGATTCT	174	4	18	1
9-qA5.3-1495.1	Murine-specific	10-qB5.1-221.1	Mouse-specific	chr9:54249982-54250008:+	TTTAATCTCAGCACCGTGGAGGCAGA	chr10:66708335-66708375:-	TTTAATCTCAGCACTTGGGAGGCAGAGGCAGGCAGATTCT	47	1	18	1
9-qA5.3-1495.1	Murine-specific	10-qB5.1-221.1	Mouse-specific	chr9:54249982-54250011:+	TTTAATCTCAGCACCGTGGAGGCAGAGGC	chr10:66708335-66708375:-	TTTAATCTCAGCACTTGGGAGGCAGAGGCAGGCAGATTCT	60	1	18	1
9-qA5.3-1495.1	Murine-specific	10-qB5.1-221.1	Mouse-specific	chr9:54249982-54250012:+	TTTAATCTCAGCACCGTGGAGGCAGAGGCT	chr10:66708335-66708375:-	TTTAATCTCAGCACTTGGGAGGCAGAGGCAGGCAGATTCT	41	1	18	1
15-qE1-8387.1	Eutherian	9-qA5.3-24188.1	Eutherian	chr15:78663179-78663204:-	TGAGATGGGAAAAGGAGGTAGCGTT	chr9:54242621-54242661:+	TGAGATGAGAAAGGGAGGTAAGGACAAAGGTCACCCAGCT	114	1	26	1
17-qA3.3-26735.1	Eutherian	17-qE1.1-7037.1	Mouse-specific	chr17:27345069-27345096:+	AATGGATGAATGGGTGGATGACACCGG	chr17:66208681-66208721:-	TATGGATGAATGAATGAATGAATGAATGAATGAATTTTTG	158	1	23	1
17-qA3.3-26735.1	Eutherian	17-qE1.1-7037.1	Mouse-specific	chr17:27345069-27345097:+	AATGGATGAATGGGTGGATGACACCGGA	chr17:66208681-66208721:-	TATGGATGAATGAATGAATGAATGAATGAATGAATTTTTG	40	1	23	1
17-qA3.3-26735.1	Eutherian	17-qE1.1-7037.1	Mouse-specific	chr17:27345069-27345097:+	AATGGATGAATGGGTGGATGACACCGGT	chr17:66208681-66208721:-	TATGGATGAATGAATGAATGAATGAATGAATGAATTTTTG	52	1	23	1
6-qD1-2831.1	Murine-specific	1-qD-4525.1	Murine-specific	chr6:87990089-87990119:-	TTAATAAACTGCCTCTGTTTATCACTATTT	chr1:92993980-92994020:+	TTAATAAACTGTCTCTGCTTCCACTACTAGTCAAATGTCC	101	1	80	1
6-qD1-2831.1	Murine-specific	1-qD-4525.1	Murine-specific	chr6:87990090-87990119:-	TTAATAAACTGCCTCTGTTTATCACTATT	chr1:92993980-92994020:+	TTAATAAACTGTCTCTGCTTCCACTACTAGTCAAATGTCC	99	1	80	1
6-qD1-2831.1	Murine-specific	1-qD-4525.1	Murine-specific	chr6:87990093-87990119:-	TTAATAAACTGCCTCTGTTTATCACT	chr1:92993980-92994020:+	TTAATAAACTGTCTCTGCTTCCACTACTAGTCAAATGTCC	358	1	80	1
7-qD1-19431.1	Eutherian	4-qB3-639.1	Mouse-specific	chr7:73115804-73115832:+	TCATATGCTACAAAGTAACTTCTCGGCT	chr4:62223024-62223064:+	TCATATGTTACAACCTAATTTCCACTGTGAGAAAAGGAAC	37	1	778	1
7-qD1-19431.1	Eutherian	4-qB3-639.1	Mouse-specific	chr7:73115804-73115833:+	TCATATGCTACAAAGTAACTTCTCGGCTA	chr4:62223024-62223064:+	TCATATGTTACAACCTAATTTCCACTGTGAGAAAAGGAAC	214	1	778	1
7-qD1-19431.1	Eutherian	4-qB3-639.1	Mouse-specific	chr7:73115804-73115835:+	TCATATGCTACAAAGTAACTTCTCGGCTACT	chr4:62223024-62223064:+	TCATATGTTACAACCTAATTTCCACTGTGAGAAAAGGAAC	58	1	778	1
7-qD1-19431.1	Eutherian	4-qB3-639.1	Mouse-specific	chr7:73115804-73115836:+	TCATATGCTACAAAGTAACTTCTCGGCTACTC	chr4:62223024-62223064:+	TCATATGTTACAACCTAATTTCCACTGTGAGAAAAGGAAC	49	1	778	1
7-qD1-19431.1	Eutherian	4-qB3-639.1	Mouse-specific	chr7:73122091-73122117:+	TCATATGTTGAAACCCAATCTCCATA	chr4:62223024-62223064:+	TCATATGTTACAACCTAATTTCCACTGTGAGAAAAGGAAC	42	1	778	1
7-qD1-19431.1	Eutherian	4-qB3-639.1	Mouse-specific	chr7:73122091-73122121:+	TCATATGTTGAAACCCAATCTCCATAGTGA	chr4:62223024-62223064:+	TCATATGTTACAACCTAATTTCCACTGTGAGAAAAGGAAC	261	1	778	1
7-qD1-19431.1	Eutherian	4-qB3-639.1	Mouse-specific	chr7:73122091-73122122:+	TCATATGTTGAAACCCAATCTCCATAGTGAC	chr4:62223024-62223064:+	TCATATGTTACAACCTAATTTCCACTGTGAGAAAAGGAAC	438	1	778	1
7-qD1-19431.1	Eutherian	4-qB3-639.1	Mouse-specific	chr7:73122091-73122123:+	TCATATGTTGAAACCCAATCTCCATAGTGACT	chr4:62223024-62223064:+	TCATATGTTACAACCTAATTTCCACTGTGAGAAAAGGAAC	64	1	778	1
12-qE-23911.1	Eutherian	11-qB1.3-590.1	Murine-specific	chr12:98411203-98411232:-	TGCCATCACTCTGGTTTCTCTGCATGCAT	chr11:50942560-50942600:+	TGCCATCAGTCTGGTTTCACTGGCCAGCATCCAGTGGACA	63	1	13	1
7-qD2-24830.1	Eutherian	9-qC-10667.1	Eutherian	chr7:73809696-73809726:-	TACAAGCAAGCACCCACTTTTCAGGATGCA	chr9:67741818-67741858:-	TACAAGCAAGGACCCACCATTTCCAGGAAGAAGCTTGTCA	31	1	21	1
7-qD2-24830.1	Eutherian	9-qC-10667.1	Eutherian	chr7:73809698-73809726:-	TACAAGCAAGCACCCACTTTTCAGGATG	chr9:67741818-67741858:-	TACAAGCAAGGACCCACCATTTCCAGGAAGAAGCTTGTCA	1043	1	21	1
7-qD2-24830.1	Eutherian	9-qC-10667.1	Eutherian	chr7:73809698-73809726:-	TACAAGCAAGCACCCACTTTTCAGGATT	chr9:67741818-67741858:-	TACAAGCAAGGACCCACCATTTCCAGGAAGAAGCTTGTCA	189	1	21	1
7-qD2-24830.1	Eutherian	9-qC-10667.1	Eutherian	chr7:73809699-73809726:-	TACAAGCAAGCACCCACTTTTCAGGAT	chr9:67741818-67741858:-	TACAAGCAAGGACCCACCATTTCCAGGAAGAAGCTTGTCA	10433	1	21	1
7-qD2-24830.1	Eutherian	9-qC-10667.1	Eutherian	chr7:73809699-73809726:-	TACAAGCAATCACCCACTTTTCAGGAT	chr9:67741818-67741858:-	TACAAGCAAGGACCCACCATTTCCAGGAAGAAGCTTGTCA	40	1	21	1
7-qD2-24830.1	Eutherian	9-qC-10667.1	Eutherian	chr7:73809700-73809726:-	TACAAGCAAGCACCCACTTTTCAGGA	chr9:67741818-67741858:-	TACAAGCAAGGACCCACCATTTCCAGGAAGAAGCTTGTCA	211	1	21	1
7-qD2-24830.1	Eutherian	9-qC-10667.1	Eutherian	chr7:73809701-73809726:-	TACAAGCAAGCACCCACTTTTCAGG	chr9:67741818-67741858:-	TACAAGCAAGGACCCACCATTTCCAGGAAGAAGCTTGTCA	101	1	21	1
pi-Tmem194.1	Murine-specific	9-qC-10667.1	Eutherian	chr10:127697466-127697492:+	TTTCGAGACACATTTTCTCTGCATAG	chr9:67742164-67742204:-	TTTCGAGACAGGGTTTCTCTGTATAGCCCTGGCTGTCCTG	40	1	16	1
pi-Tmem194.1	Murine-specific	9-qC-10667.1	Eutherian	chr10:127697466-127697495:+	TTTCGAGACACATTTTCTCTGCATAGCCC	chr9:67742164-67742204:-	TTTCGAGACAGGGTTTCTCTGTATAGCCCTGGCTGTCCTG	209	1	16	1
pi-Tmem194.1	Murine-specific	9-qC-10667.1	Eutherian	chr10:127697466-127697496:+	TTTCGAGACACATTTTCTCTGCATAGCCCT	chr9:67742164-67742204:-	TTTCGAGACAGGGTTTCTCTGTATAGCCCTGGCTGTCCTG	702	1	16	1
9-qA5.3-24188.1	Eutherian	9-qC-10667.1	Eutherian	chr9:54207981-54208011:-	TTTCGAGACAGAGTTTCTCTGAATAGTCCT	chr9:67742164-67742204:-	TTTCGAGACAGGGTTTCTCTGTATAGCCCTGGCTGTCCTG	163	1	16	1
7-qD2-11976.1	Eutherian	7-qD2-24830.1	Eutherian	chr7:73824991-73825015:+	TATGTGAATTTCAACTGTTGGCTC	chr7:73786091-73786131:+	TATGTGAATTCCAACTGTTTCCACCCCAGGAAAGAAAACT	300	1	227	1
7-qD2-11976.1	Eutherian	7-qD2-24830.1	Eutherian	chr7:73824991-73825016:+	TATGTGAATTTCAACTGTTGGCTCT	chr7:73786091-73786131:+	TATGTGAATTCCAACTGTTTCCACCCCAGGAAAGAAAACT	46	1	227	1
7-qD2-11976.1	Eutherian	7-qD2-24830.1	Eutherian	chr7:73824991-73825016:+	TATGTGAATTTCAACTGTTGGCTCC	chr7:73786091-73786131:+	TATGTGAATTCCAACTGTTTCCACCCCAGGAAAGAAAACT	989	1	227	1
7-qD2-11976.1	Eutherian	7-qD2-24830.1	Eutherian	chr7:73824991-73825017:+	TATGTGAATTTCAACTGTTGGCTCCT	chr7:73786091-73786131:+	TATGTGAATTCCAACTGTTTCCACCCCAGGAAAGAAAACT	52	1	227	1
7-qD2-11976.1	Eutherian	7-qD2-24830.1	Eutherian	chr7:73824991-73825017:+	TATGTGAATTTCAACTGTTGGCTCCA	chr7:73786091-73786131:+	TATGTGAATTCCAACTGTTTCCACCCCAGGAAAGAAAACT	797	1	227	1
7-qD2-11976.1	Eutherian	7-qD2-24830.1	Eutherian	chr7:73824991-73825018:+	TATGTGAATTTCAACTGTTGGCTCCAT	chr7:73786091-73786131:+	TATGTGAATTCCAACTGTTTCCACCCCAGGAAAGAAAACT	114	1	227	1
7-qD2-11976.1	Eutherian	7-qD2-24830.1	Eutherian	chr7:73824991-73825018:+	TATGTGAATTTCAACTGTTGGCTCCAC	chr7:73786091-73786131:+	TATGTGAATTCCAACTGTTTCCACCCCAGGAAAGAAAACT	692	1	227	1
7-qD2-11976.1	Eutherian	7-qD2-24830.1	Eutherian	chr7:73824991-73825019:+	TATGTGAATTTCAACTGTTGGCTCCACT	chr7:73786091-73786131:+	TATGTGAATTCCAACTGTTTCCACCCCAGGAAAGAAAACT	238	1	227	1
7-qD2-11976.1	Eutherian	7-qD2-24830.1	Eutherian	chr7:73824991-73825019:+	TATGTGAATTTCAACTGTTGGCTCCACG	chr7:73786091-73786131:+	TATGTGAATTCCAACTGTTTCCACCCCAGGAAAGAAAACT	37	1	227	1
7-qD2-11976.1	Eutherian	7-qD2-24830.1	Eutherian	chr7:73824991-73825019:+	TATGTGAATTTCAACTGTTGGCTCCACA	chr7:73786091-73786131:+	TATGTGAATTCCAACTGTTTCCACCCCAGGAAAGAAAACT	659	1	227	1
7-qD2-11976.1	Eutherian	7-qD2-24830.1	Eutherian	chr7:73824991-73825020:+	TATGTGAATTTCAACTGTTGGCTCCACAG	chr7:73786091-73786131:+	TATGTGAATTCCAACTGTTTCCACCCCAGGAAAGAAAACT	853	1	227	1
7-qD2-11976.1	Eutherian	7-qD2-24830.1	Eutherian	chr7:73824991-73825021:+	TATGTGAATTTCAACTGTTGGCTCCACAGG	chr7:73786091-73786131:+	TATGTGAATTCCAACTGTTTCCACCCCAGGAAAGAAAACT	14808	1	227	1
7-qD2-11976.1	Eutherian	7-qD2-24830.1	Eutherian	chr7:73824991-73825021:+	TATGTGAATTTCAACTGTTGGCTCCACAGT	chr7:73786091-73786131:+	TATGTGAATTCCAACTGTTTCCACCCCAGGAAAGAAAACT	579	1	227	1
7-qD2-11976.1	Eutherian	7-qD2-24830.1	Eutherian	chr7:73824991-73825021:+	TATGTGAATTTCAACTGTTGGCTCCACAGA	chr7:73786091-73786131:+	TATGTGAATTCCAACTGTTTCCACCCCAGGAAAGAAAACT	80	1	227	1
7-qD2-11976.1	Eutherian	7-qD2-24830.1	Eutherian	chr7:73824991-73825022:+	TATGTGAATTTCAACTGTTGGCTCCACAGGT	chr7:73786091-73786131:+	TATGTGAATTCCAACTGTTTCCACCCCAGGAAAGAAAACT	1484	1	227	1
7-qD2-11976.1	Eutherian	7-qD2-24830.1	Eutherian	chr7:73824991-73825022:+	TATGTGAATTTCAACTGTTGGCTCCACAGGG	chr7:73786091-73786131:+	TATGTGAATTCCAACTGTTTCCACCCCAGGAAAGAAAACT	226	1	227	1
7-qD2-11976.1	Eutherian	7-qD2-24830.1	Eutherian	chr7:73824991-73825023:+	TATGTGAATTTCAACTGTTGGCTCCACAGGGT	chr7:73786091-73786131:+	TATGTGAATTCCAACTGTTTCCACCCCAGGAAAGAAAACT	130	1	227	1
15-qE1-8387.1	Eutherian	18-qE1-36451.1	Eutherian	chr15:78666405-78666437:-	TCAGTTGGTAGAGTGCTTGCCTAGCACGAATT	chr18:67042409-67042449:+	TCAGTTGGTAAAGTGTTTGGGCATCATGTTAAAAACAAAA	86	1	53	1
15-qE1-8387.1	Eutherian	18-qE1-36451.1	Eutherian	chr15:78666406-78666437:-	TCAGTTGGTAGAGTGCTTGCCTAGCACGAAT	chr18:67042409-67042449:+	TCAGTTGGTAAAGTGTTTGGGCATCATGTTAAAAACAAAA	265	1	53	1
15-qE1-8387.1	Eutherian	18-qE1-36451.1	Eutherian	chr15:78666406-78666437:-	TCAGTTGGTAGAGTGCTTGCCTAGCACGATT	chr18:67042409-67042449:+	TCAGTTGGTAAAGTGTTTGGGCATCATGTTAAAAACAAAA	49	1	53	1
15-qE1-8387.1	Eutherian	18-qE1-36451.1	Eutherian	chr15:78666407-78666437:-	TCAGTTGGTAGAGTGCTTGCCTAGCACGAA	chr18:67042409-67042449:+	TCAGTTGGTAAAGTGTTTGGGCATCATGTTAAAAACAAAA	314	1	53	1
15-qE1-8387.1	Eutherian	18-qE1-36451.1	Eutherian	chr15:78666408-78666437:-	TCAGTTGGTAGAGTGCTTGCCTAGCACGA	chr18:67042409-67042449:+	TCAGTTGGTAAAGTGTTTGGGCATCATGTTAAAAACAAAA	287	1	53	1
15-qE1-8387.1	Eutherian	18-qE1-36451.1	Eutherian	chr15:78666409-78666437:-	TCAGTTGGTAGAGTGCTTGCCTAGCACG	chr18:67042409-67042449:+	TCAGTTGGTAAAGTGTTTGGGCATCATGTTAAAAACAAAA	192	4	53	1
6-qF3-28913.1	Murine-specific	pi-Wdfy3.1	Mouse-specific	chr6:127802104-127802131:+	TAGCCAAGAGGTGTGAGCAGAGCAAAC	chr5:101833762-101833802:+	AAGCCAAGGGATGTGAGCCCAGTGCCCAGTGCGAGTGTCT	64	1	15	1
18-qE1-36451.1	Eutherian	17-qA3.3-27363.1	Eutherian	chr18:67040341-67040371:-	AACTATTCTAGACACAAGCACCTTGTGAGA	chr17:27307401-27307441:+	GACTATTCTAGAGTCAACCACTGCCCTGGGTAGCAAGTGT	31	1	15	1
9-qC-31469.1	Murine-specific	7-qD1-654.1	Murine-specific	chr9:67728520-67728546:-	TGAATGAATGAATGAATGGGGGTGTC	chr7:73104578-73104618:+	AGAATGAATGAATGAATGAATGACAAAATATGCCCTGTGC	41	1	15	1
10-qB4-6488.1	Murine-specific	6-qC3-100.1	Murine-specific	chr10:62661908-62661933:+	TACAGAGTGAGTTCCAGAACAGACT	chr6:83586340-83586380:-	TACAGAGTGAGTTCCAGGACAACCAGGACTATACAGAGAA	55	1	15	1
10-qB4-6488.1	Murine-specific	6-qC3-100.1	Murine-specific	chr10:62661908-62661934:+	TACAGAGTGAGTTCCAGAACAGACTG	chr6:83586340-83586380:-	TACAGAGTGAGTTCCAGGACAACCAGGACTATACAGAGAA	157	1	15	1
10-qB4-6488.1	Murine-specific	6-qC3-100.1	Murine-specific	chr10:62661908-62661935:+	TACAGAGTGAGTTCCAGAACAGACTGA	chr6:83586340-83586380:-	TACAGAGTGAGTTCCAGGACAACCAGGACTATACAGAGAA	430	1	15	1
10-qB4-6488.1	Murine-specific	6-qC3-100.1	Murine-specific	chr10:62661908-62661936:+	TACAGAGTGAGTTCCAGAACAGACTGAG	chr6:83586340-83586380:-	TACAGAGTGAGTTCCAGGACAACCAGGACTATACAGAGAA	139	1	15	1
10-qB4-6488.1	Murine-specific	6-qC3-100.1	Murine-specific	chr10:62661908-62661937:+	TACAGAGTGAGTTCCAGAACAGACTGAGC	chr6:83586340-83586380:-	TACAGAGTGAGTTCCAGGACAACCAGGACTATACAGAGAA	147	1	15	1
10-qB4-6488.1	Murine-specific	6-qC3-100.1	Murine-specific	chr10:62661908-62661938:+	TACAGAGTGAGTTCCAGAACAGACTGAGCT	chr6:83586340-83586380:-	TACAGAGTGAGTTCCAGGACAACCAGGACTATACAGAGAA	208	1	15	1
11-qE1-9443.1	Murine-specific	6-qC3-100.1	Murine-specific	chr11:103429608-103429636:+	TACAGAGTGAGTTCCAGGACAGCGCCAG	chr6:83586340-83586380:-	TACAGAGTGAGTTCCAGGACAACCAGGACTATACAGAGAA	162	2	15	1
11-qE1-9443.1	Murine-specific	6-qC3-100.1	Murine-specific	chr11:103447069-103447097:+	TACAGAGTGAGTTCTAGGACAGTGAGAC	chr6:83586340-83586380:-	TACAGAGTGAGTTCCAGGACAACCAGGACTATACAGAGAA	86	1	15	1
11-qE1-9443.1	Murine-specific	6-qC3-100.1	Murine-specific	chr11:103447069-103447098:+	TACAGAGTGAGTTCTAGGACAGTGAGACT	chr6:83586340-83586380:-	TACAGAGTGAGTTCCAGGACAACCAGGACTATACAGAGAA	82	1	15	1
11-qE1-9443.1	Murine-specific	6-qC3-100.1	Murine-specific	chr11:103447069-103447099:+	TACAGAGTGAGTTCTAGGACAGTGAGACTC	chr6:83586340-83586380:-	TACAGAGTGAGTTCCAGGACAACCAGGACTATACAGAGAA	703	1	15	1
9-qC-10667.1	Eutherian	6-qC3-100.1	Murine-specific	chr9:67754231-67754259:+	TACAGAGTGAGTTCCAGGACAGCCATAC	chr6:83586340-83586380:-	TACAGAGTGAGTTCCAGGACAACCAGGACTATACAGAGAA	185	3	15	1
9-qC-10667.1	Eutherian	6-qC3-100.1	Murine-specific	chr9:67754231-67754260:+	TACAGAGTGAGTTCCAGGACAGCCATACA	chr6:83586340-83586380:-	TACAGAGTGAGTTCCAGGACAACCAGGACTATACAGAGAA	834	2	15	1
9-qC-10667.1	Eutherian	6-qC3-100.1	Murine-specific	chr9:67754231-67754261:+	TACAGAGTGAGTTCCAGGACAGCCATACAG	chr6:83586340-83586380:-	TACAGAGTGAGTTCCAGGACAACCAGGACTATACAGAGAA	83	1	15	1
2-qE1-35981.1	Eutherian	9-qC-10667.1	Eutherian	chr2:92588094-92588119:+	TGATAGAGGTTTCCTGGATGCCACT	chr9:67754940-67754980:-	GGATAGAGACTTCCTGGAGACCACAGCTGCAGAATAAGCC	45	1	64	1
2-qE1-35981.1	Eutherian	9-qC-10667.1	Eutherian	chr2:92588094-92588120:+	TGATAGAGGTTTCCTGGATGCCACTG	chr9:67754940-67754980:-	GGATAGAGACTTCCTGGAGACCACAGCTGCAGAATAAGCC	216	1	64	1
2-qE1-35981.1	Eutherian	9-qC-10667.1	Eutherian	chr2:92588094-92588121:+	TGATAGAGGTTTCCTGGATGCCACTGG	chr9:67754940-67754980:-	GGATAGAGACTTCCTGGAGACCACAGCTGCAGAATAAGCC	108	1	64	1
2-qE1-35981.1	Eutherian	9-qC-10667.1	Eutherian	chr2:92588094-92588121:+	TGATAGAGGTTTCCTGGATGCCACTGT	chr9:67754940-67754980:-	GGATAGAGACTTCCTGGAGACCACAGCTGCAGAATAAGCC	43	1	64	1
2-qE1-35981.1	Eutherian	9-qC-10667.1	Eutherian	chr2:92588094-92588122:+	TGATAGAGGTTTCCTGGATGCCACTGGT	chr9:67754940-67754980:-	GGATAGAGACTTCCTGGAGACCACAGCTGCAGAATAAGCC	61	1	64	1
2-qE1-35981.1	Eutherian	9-qC-10667.1	Eutherian	chr2:92588094-92588123:+	TGATAGAGGTTTCCTGGATGCCACTGGTT	chr9:67754940-67754980:-	GGATAGAGACTTCCTGGAGACCACAGCTGCAGAATAAGCC	193	1	64	1
2-qE1-35981.1	Eutherian	9-qC-10667.1	Eutherian	chr2:92588094-92588124:+	TGATAGAGGTTTCCTGGATGCCACTGGTTT	chr9:67754940-67754980:-	GGATAGAGACTTCCTGGAGACCACAGCTGCAGAATAAGCC	99	1	64	1
17-qA3.3-26735.1	Eutherian	18-qE1-36451.1	Eutherian	chr17:27348571-27348598:+	TCCTATGTGGGGCTAAACTTTGATCCA	chr18:67052542-67052582:+	CCCTATGTGGGTCTAAGCTGGGTCCTCTTTTGGGACCCTT	47	1	119	1
17-qA3.3-26735.1	Eutherian	18-qE1-36451.1	Eutherian	chr17:27348571-27348600:+	TCCTATGTGGGGCTAAACTTTGATCCAAT	chr18:67052542-67052582:+	CCCTATGTGGGTCTAAGCTGGGTCCTCTTTTGGGACCCTT	69	1	119	1
17-qA3.3-26735.1	Eutherian	18-qE1-36451.1	Eutherian	chr17:27348571-27348601:+	TCCTATGTGGGGCTAAACTTTGATCCAAAT	chr18:67052542-67052582:+	CCCTATGTGGGTCTAAGCTGGGTCCTCTTTTGGGACCCTT	293	1	119	1
17-qA3.3-27363.1	Eutherian	6-qF3-28913.1	Murine-specific	chr17:27291013-27291039:-	TTGTAGAAAGCAGGGGGAATAGAGAA	chr6:127799168-127799208:-	TTGTAGAAAGCAGGGAAAATATTAGAACATTGAACTGATG	62	1	18	1
10-qC1-12816.1	Murine-specific	2-qE1-35981.1	Eutherian	chr10:75838718-75838745:+	TACTAGCTGAGTGACCTTGAGCAAATC	chr2:92574374-92574414:-	AACTAGCTGTGCGACCTTGGGCAAGTCCTTGACCTCCTGG	68	1	45	1
10-qC1-12816.1	Murine-specific	2-qE1-35981.1	Eutherian	chr10:75838718-75838746:+	TACTAGCTGAGTGACCTTGAGCAAATCA	chr2:92574374-92574414:-	AACTAGCTGTGCGACCTTGGGCAAGTCCTTGACCTCCTGG	211	1	45	1
10-qC1-12816.1	Murine-specific	2-qE1-35981.1	Eutherian	chr10:75838718-75838747:+	TACTAGCTGAGTGACCTTGAGCAAATCAA	chr2:92574374-92574414:-	AACTAGCTGTGCGACCTTGGGCAAGTCCTTGACCTCCTGG	132	1	45	1
12-qE-23911.1	Eutherian	2-qE1-35981.1	Eutherian	chr12:98418644-98418669:-	TACTAGCTTTGTGACCTTGGGGCAG	chr2:92574374-92574414:-	AACTAGCTGTGCGACCTTGGGCAAGTCCTTGACCTCCTGG	37	1	45	1
5-qF-14508.1	Eutherian	8-qC5-2209.1	Mouse-specific	chr5:113333449-113333477:-	ACAACTCTTATGAAAGAAAGCCTTTAAT	chr8:93423294-93423334:+	ACAACTCTTATGAAGGACAACATTTAATCGGGGCTGGCTT	48	1	16	1
10-qC1-1527.1	Mouse-specific	14-qC1-1010.1	Mouse-specific	chr10:86589081-86589112:-	TGAGATGTTGGAAAATCTGGAAGGCCTCGGC	chr14:44942551-44942591:-	TGAGATGTTAGAGATGCTGGAGGCATGGTATATCTGCTGA	37	1	51	1
10-qC1-1527.1	Mouse-specific	14-qC1-1010.1	Mouse-specific	chr10:86589083-86589112:-	TGAGATGTTGGAAAATCTGGAAGGCCTCG	chr14:44942551-44942591:-	TGAGATGTTAGAGATGCTGGAGGCATGGTATATCTGCTGA	57	1	51	1
10-qC1-1527.1	Mouse-specific	14-qC1-1010.1	Mouse-specific	chr10:86589084-86589112:-	TGAGATGTTGGAAAATCTGGAAGGCCTT	chr14:44942551-44942591:-	TGAGATGTTAGAGATGCTGGAGGCATGGTATATCTGCTGA	44	1	51	1
10-qC1-1527.1	Mouse-specific	14-qC1-1010.1	Mouse-specific	chr10:86589084-86589112:-	TGAGATGTTGGAAAATCTGGAAGGCCTC	chr14:44942551-44942591:-	TGAGATGTTAGAGATGCTGGAGGCATGGTATATCTGCTGA	54	1	51	1
10-qC1-1527.1	Mouse-specific	14-qC1-1010.1	Mouse-specific	chr10:86589085-86589112:-	TGAGATGTTGGAAAATCTGGAAGGCCT	chr14:44942551-44942591:-	TGAGATGTTAGAGATGCTGGAGGCATGGTATATCTGCTGA	3706	1	51	1
10-qC1-1527.1	Mouse-specific	14-qC1-1010.1	Mouse-specific	chr10:86589086-86589112:-	TGAGATGTTGGAAAATCTGGAAGGCC	chr14:44942551-44942591:-	TGAGATGTTAGAGATGCTGGAGGCATGGTATATCTGCTGA	452	1	51	1
10-qC1-875.1	Murine-specific	14-qC1-1010.1	Mouse-specific	chr10:86619399-86619424:+	TGAGATGTTGGAAAAGCTGGAAGGC	chr14:44942551-44942591:-	TGAGATGTTAGAGATGCTGGAGGCATGGTATATCTGCTGA	36	1	51	1
10-qC1-875.1	Murine-specific	14-qC1-1010.1	Mouse-specific	chr10:86619399-86619426:+	TGAGATGTTGGAAAAGCTGGAAGGCCT	chr14:44942551-44942591:-	TGAGATGTTAGAGATGCTGGAGGCATGGTATATCTGCTGA	856	1	51	1
10-qC1-875.1	Murine-specific	14-qC1-1010.1	Mouse-specific	chr10:86619399-86619427:+	TGAGATGTTGGAAAAGCTGGAAGGCCTC	chr14:44942551-44942591:-	TGAGATGTTAGAGATGCTGGAGGCATGGTATATCTGCTGA	1032	1	51	1
10-qC1-875.1	Murine-specific	14-qC1-1010.1	Mouse-specific	chr10:86619399-86619427:+	TGAGATGTTGGAAAAGCTGGAAGGCCTT	chr14:44942551-44942591:-	TGAGATGTTAGAGATGCTGGAGGCATGGTATATCTGCTGA	33	1	51	1
10-qC1-875.1	Murine-specific	14-qC1-1010.1	Mouse-specific	chr10:86619399-86619428:+	TGAGATGTTGGAAAAGCTGGAAGGCCTCT	chr14:44942551-44942591:-	TGAGATGTTAGAGATGCTGGAGGCATGGTATATCTGCTGA	34	1	51	1
10-qC1-875.1	Murine-specific	14-qC1-1010.1	Mouse-specific	chr10:86619399-86619429:+	TGAGATGTTGGAAAAGCTGGAAGGCCTCGG	chr14:44942551-44942591:-	TGAGATGTTAGAGATGCTGGAGGCATGGTATATCTGCTGA	48	1	51	1
18-qE1-36451.1	Eutherian	12-qE-23911.1	Eutherian	chr18:67045223-67045254:-	TATTTAACAACTCGTGTGACATGGGCACAGT	chr12:98394562-98394602:+	TATTTAACAACTAGTACAACATAGGCACTAAGCAATAGAG	54	1	98	1
18-qE1-36451.1	Eutherian	12-qE-23911.1	Eutherian	chr18:67045224-67045254:-	TATTTAACAACTCGTGTGACATGGGCACAT	chr12:98394562-98394602:+	TATTTAACAACTAGTACAACATAGGCACTAAGCAATAGAG	46	1	98	1
18-qE1-36451.1	Eutherian	12-qE-23911.1	Eutherian	chr18:67045224-67045254:-	TATTTAACAACTCGTGTGACATGGGCACAG	chr12:98394562-98394602:+	TATTTAACAACTAGTACAACATAGGCACTAAGCAATAGAG	90	1	98	1
18-qE1-36451.1	Eutherian	12-qE-23911.1	Eutherian	chr18:67045225-67045254:-	TATTTAACAACTCGTGTGACATGGGCACA	chr12:98394562-98394602:+	TATTTAACAACTAGTACAACATAGGCACTAAGCAATAGAG	4489	1	98	1
18-qE1-36451.1	Eutherian	12-qE-23911.1	Eutherian	chr18:67045225-67045254:-	TATTTAACAACTCGTGTGACATGGGCACT	chr12:98394562-98394602:+	TATTTAACAACTAGTACAACATAGGCACTAAGCAATAGAG	77	1	98	1
18-qE1-36451.1	Eutherian	12-qE-23911.1	Eutherian	chr18:67045226-67045254:-	TATTTAACAACTCGTGTGACATGGGCAC	chr12:98394562-98394602:+	TATTTAACAACTAGTACAACATAGGCACTAAGCAATAGAG	300	1	98	1
18-qE1-36451.1	Eutherian	12-qE-23911.1	Eutherian	chr18:67045228-67045254:-	TATTTAACAACTCGTGTGACATGGGC	chr12:98394562-98394602:+	TATTTAACAACTAGTACAACATAGGCACTAAGCAATAGAG	64	1	98	1
7-qD2-11976.1	Eutherian	6-qF3-28913.1	Murine-specific	chr7:73824296-73824320:+	TAAGTTTTATGAATTTCCTGAGCC	chr6:127813215-127813255:-	TAAGTTTTAAGAATTTCTTGAACTTTTTAGTCTTGGGATC	166	1	28	1
7-qD2-11976.1	Eutherian	6-qF3-28913.1	Murine-specific	chr7:73824296-73824321:+	TAAGTTTTATGAATTTCCTGAGCCT	chr6:127813215-127813255:-	TAAGTTTTAAGAATTTCTTGAACTTTTTAGTCTTGGGATC	711	1	28	1
7-qD2-11976.1	Eutherian	6-qF3-28913.1	Murine-specific	chr7:73824296-73824322:+	TAAGTTTTATGAATTTCCTGAGCCTT	chr6:127813215-127813255:-	TAAGTTTTAAGAATTTCTTGAACTTTTTAGTCTTGGGATC	236	1	28	1
7-qD2-11976.1	Eutherian	6-qF3-28913.1	Murine-specific	chr7:73824296-73824323:+	TAAGTTTTATGAATTTCCTGAGCCTTC	chr6:127813215-127813255:-	TAAGTTTTAAGAATTTCTTGAACTTTTTAGTCTTGGGATC	154	1	28	1
7-qD2-11976.1	Eutherian	6-qF3-28913.1	Murine-specific	chr7:73824296-73824324:+	TAAGTTTTATGAATTTCCTGAGCCTTCT	chr6:127813215-127813255:-	TAAGTTTTAAGAATTTCTTGAACTTTTTAGTCTTGGGATC	238	1	28	1
7-qD2-11976.1	Eutherian	6-qF3-28913.1	Murine-specific	chr7:73824296-73824325:+	TAAGTTTTATGAATTTCCTGAGCCTTCTT	chr6:127813215-127813255:-	TAAGTTTTAAGAATTTCTTGAACTTTTTAGTCTTGGGATC	246	1	28	1
7-qD2-11976.1	Eutherian	6-qF3-28913.1	Murine-specific	chr7:73824296-73824326:+	TAAGTTTTATGAATTTCCTGAGCCTTCTTT	chr6:127813215-127813255:-	TAAGTTTTAAGAATTTCTTGAACTTTTTAGTCTTGGGATC	941	1	28	1
7-qD2-11976.1	Eutherian	6-qF3-28913.1	Murine-specific	chr7:73824296-73824327:+	TAAGTTTTATGAATTTCCTGAGCCTTCTTTA	chr6:127813215-127813255:-	TAAGTTTTAAGAATTTCTTGAACTTTTTAGTCTTGGGATC	83	1	28	1
6-qF3-28913.1	Murine-specific	9-qC-31469.1	Murine-specific	chr6:127827650-127827676:+	TCTCAACAAAAGGAGTGGTTCTGGGG	chr9:67721579-67721619:+	GCTCAACAAAATGGATGGTTCCTGAGGTCAACACGTTATC	54	1	25	1
6-qF3-28913.1	Murine-specific	9-qC-31469.1	Murine-specific	chr6:127827650-127827679:+	TCTCAACAAAAGGAGTGGTTCTGGGGACT	chr9:67721579-67721619:+	GCTCAACAAAATGGATGGTTCCTGAGGTCAACACGTTATC	41	1	25	1
10-qB4-6488.1	Murine-specific	17-qA3.3-27363.1	Eutherian	chr10:62678240-62678270:+	TGAGTTCGAGCCCAGCCTGGTCTACCGAGT	chr17:27293008-27293048:+	TGAGTTCAAGGCCAGCCTGGTCTACAGTTTGAGTTCCAAG	59	1	15	1
9-qC-10667.1	Eutherian	17-qA3.3-27363.1	Eutherian	chr9:67742129-67742157:+	TGAGTTCAAGGACAGCCTGGTCTAAAAG	chr17:27293008-27293048:+	TGAGTTCAAGGCCAGCCTGGTCTACAGTTTGAGTTCCAAG	41	1	15	1
9-qC-10667.1	Eutherian	17-qA3.3-27363.1	Eutherian	chr9:67742129-67742158:+	TGAGTTCAAGGACAGCCTGGTCTAAAAGT	chr17:27293008-27293048:+	TGAGTTCAAGGCCAGCCTGGTCTACAGTTTGAGTTCCAAG	86	1	15	1
6-qF3-28913.1	Murine-specific	9-qA5.3-24188.1	Eutherian	chr6:127812269-127812299:+	TCAGTGGTTAAGAGTGCTTGCTGCTCTTAC	chr9:54211286-54211326:+	TCAGTGGTTAAGAGCACTGGCTGCTCTTCCAGAGGTCCTG	93	3	37	1
9-qA5.3-1495.1	Murine-specific	9-qA5.3-24188.1	Eutherian	chr9:54251323-54251353:+	TCAGTGGTTAAGAGCATTTGCTAATCTGTA	chr9:54211286-54211326:+	TCAGTGGTTAAGAGCACTGGCTGCTCTTCCAGAGGTCCTG	56	1	37	1
13-qA5-464.1	Mouse-specific	4-qC5-17839.1	Eutherian	chr13:50512549-50512579:-	TAAAGCTCAAGGACCATAGCGCAAGGACAG	chr4:94309535-94309575:+	TAAAGCTCAAGGATGATAGTGGAAGAGGAGAGTAAAAGAT	31	1	39	1
7-qD2-11976.1	Eutherian	7-qD1-9417.1	Murine-specific	chr7:73821484-73821510:+	CAGAAGTCCAAAATCAAGGTACTGGC	chr7:69886583-69886623:+	CAGAAGTCCAAGATCAAGGTGCCAGTAGTATGTTTCTTCT	69	1	15	1
10-qB4-6488.1	Murine-specific	9-qA5.3-24188.1	Eutherian	chr10:62668524-62668554:+	TTCAAGGTCGTCCTTGCCTACATAGTGAGT	chr9:54230030-54230070:+	TTCAAGGTCAGCCTGGTCTACAAAGCAATCCTATGCTAGC	139	1	45	1
9-qC-10667.1	Eutherian	9-qA5.3-24188.1	Eutherian	chr9:67758077-67758106:+	TTCAAGGACAGCCTGGGCACCTTAGCAAG	chr9:54230030-54230070:+	TTCAAGGTCAGCCTGGTCTACAAAGCAATCCTATGCTAGC	36	1	45	1
15-qD1-17920.1	Eutherian	15-qD1-17920.1	Eutherian	chr15:59265032-59265063:-	GTTGTTGTGAGAATTAAATAAATCAGTGCCT	chr15:59258578-59258618:+	GTTGTTGTGAGGATTCCATAAATTTATGCAGAAAAAAAAA	221	1	25	1
15-qD1-17920.1	Eutherian	15-qD1-17920.1	Eutherian	chr15:59265033-59265063:-	GTTGTTGTGAGAATTAAATAAATCAGTGCC	chr15:59258578-59258618:+	GTTGTTGTGAGGATTCCATAAATTTATGCAGAAAAAAAAA	36	1	25	1
15-qD1-17920.1	Eutherian	15-qD1-17920.1	Eutherian	chr15:59265035-59265063:-	GTTGTTGTGAGAATTAAATAAATCAGTG	chr15:59258578-59258618:+	GTTGTTGTGAGGATTCCATAAATTTATGCAGAAAAAAAAA	53	1	25	1
15-qD1-17920.1	Eutherian	15-qD1-17920.1	Eutherian	chr15:59265036-59265063:-	GTTGTTGTGAGAATTAAATAAATCAGT	chr15:59258578-59258618:+	GTTGTTGTGAGGATTCCATAAATTTATGCAGAAAAAAAAA	55	1	25	1
17-qA3.3-26735.1	Eutherian	4-qC5-17839.1	Eutherian	chr17:27334091-27334115:+	TGACACCACCAAGCTGAGGACAGA	chr4:94325537-94325577:+	CGACACCACCAAGCTCAGGACTTGCTTTCCGTATTCCCGG	212	1	18	1
17-qA3.3-26735.1	Eutherian	4-qC5-17839.1	Eutherian	chr17:27334091-27334116:+	TGACACCACCAAGCTGAGGACAGAA	chr4:94325537-94325577:+	CGACACCACCAAGCTCAGGACTTGCTTTCCGTATTCCCGG	44	1	18	1
17-qA3.3-26735.1	Eutherian	4-qC5-17839.1	Eutherian	chr17:27334091-27334117:+	TGACACCACCAAGCTGAGGACAGAAA	chr4:94325537-94325577:+	CGACACCACCAAGCTCAGGACTTGCTTTCCGTATTCCCGG	123	1	18	1
17-qA3.3-26735.1	Eutherian	4-qC5-17839.1	Eutherian	chr17:27334091-27334117:+	TGACACCACCAAGCTGAGGACAGAAT	chr4:94325537-94325577:+	CGACACCACCAAGCTCAGGACTTGCTTTCCGTATTCCCGG	46	1	18	1
17-qA3.3-26735.1	Eutherian	4-qC5-17839.1	Eutherian	chr17:27334091-27334118:+	TGACACCACCAAGCTGAGGACAGAAAT	chr4:94325537-94325577:+	CGACACCACCAAGCTCAGGACTTGCTTTCCGTATTCCCGG	100	1	18	1
17-qA3.3-26735.1	Eutherian	4-qC5-17839.1	Eutherian	chr17:27334091-27334118:+	TGACACCACCAAGCTGAGGACAGAAAA	chr4:94325537-94325577:+	CGACACCACCAAGCTCAGGACTTGCTTTCCGTATTCCCGG	120	1	18	1
17-qA3.3-26735.1	Eutherian	4-qC5-17839.1	Eutherian	chr17:27334091-27334119:+	TGACACCACCAAGCTGAGGACAGAAAAA	chr4:94325537-94325577:+	CGACACCACCAAGCTCAGGACTTGCTTTCCGTATTCCCGG	128	1	18	1
17-qA3.3-26735.1	Eutherian	4-qC5-17839.1	Eutherian	chr17:27334091-27334119:+	TGACACCACCAAGCTGAGGACAGAAAAT	chr4:94325537-94325577:+	CGACACCACCAAGCTCAGGACTTGCTTTCCGTATTCCCGG	49	1	18	1
17-qA3.3-26735.1	Eutherian	4-qC5-17839.1	Eutherian	chr17:27334091-27334120:+	TGACACCACCAAGCTGAGGACAGAAAAAC	chr4:94325537-94325577:+	CGACACCACCAAGCTCAGGACTTGCTTTCCGTATTCCCGG	369	1	18	1
17-qA3.3-26735.1	Eutherian	4-qC5-17839.1	Eutherian	chr17:27334091-27334120:+	TGACACCACCAAGCTGAGGACAGAAAAAT	chr4:94325537-94325577:+	CGACACCACCAAGCTCAGGACTTGCTTTCCGTATTCCCGG	38	1	18	1
17-qA3.3-26735.1	Eutherian	4-qC5-17839.1	Eutherian	chr17:27334091-27334121:+	TGACACCACCAAGCTGAGGACAGAAAAACT	chr4:94325537-94325577:+	CGACACCACCAAGCTCAGGACTTGCTTTCCGTATTCCCGG	949	1	18	1
17-qA3.3-26735.1	Eutherian	7-qD2-24830.1	Eutherian	chr17:27344966-27344990:+	TAGTTGTCTGTCTCCACCCACCCA	chr7:73816396-73816436:+	TAGTTGTCTGTCTCTTCCCTCCGTCACTTCCCCTCAAACG	105	1	25	1
17-qA3.3-26735.1	Eutherian	7-qD2-24830.1	Eutherian	chr17:27344966-27344991:+	TAGTTGTCTGTCTCCACCCACCCAC	chr7:73816396-73816436:+	TAGTTGTCTGTCTCTTCCCTCCGTCACTTCCCCTCAAACG	45	1	25	1
17-qA3.3-26735.1	Eutherian	7-qD2-24830.1	Eutherian	chr17:27344966-27344992:+	TAGTTGTCTGTCTCCACCCACCCACT	chr7:73816396-73816436:+	TAGTTGTCTGTCTCTTCCCTCCGTCACTTCCCCTCAAACG	55	1	25	1
17-qA3.3-26735.1	Eutherian	7-qD2-24830.1	Eutherian	chr17:27344966-27344994:+	TAGTTGTCTGTCTCCACCCACCCACTCT	chr7:73816396-73816436:+	TAGTTGTCTGTCTCTTCCCTCCGTCACTTCCCCTCAAACG	65	1	25	1
10-qB4-6488.1	Murine-specific	5-qG2-950.1	Murine-specific	chr10:62661909-62661938:+	ACAGAGTGAGTTCCAGAACAGACTGAGCT	chr5:136936253-136936293:-	ACAGAGTGAGATTCAGGCCAGCCTAGGCAACTCAGTAAGA	58	1	30	1
5-qG3-23659.1	Eutherian	14-qA3-19970.1	Murine-specific	chr5:149824786-149824816:-	TTCTTCTGAGGGATTGATGGTACCATAGGT	chr14:24094369-24094409:-	GTCTTCTGAGGAAGGGATGGGCGTGAGGAAGCAGGAAAAC	72	1	21	1
5-qG3-23659.1	Eutherian	14-qA3-19970.1	Murine-specific	chr5:149824787-149824816:-	TTCTTCTGAGGGATTGATGGTACCATAGG	chr14:24094369-24094409:-	GTCTTCTGAGGAAGGGATGGGCGTGAGGAAGCAGGAAAAC	226	1	21	1
5-qG3-23659.1	Eutherian	14-qA3-19970.1	Murine-specific	chr5:149824792-149824816:-	TTCTTCTGAGGGATTGATGGTACC	chr14:24094369-24094409:-	GTCTTCTGAGGAAGGGATGGGCGTGAGGAAGCAGGAAAAC	77	1	21	1
10-qB4-6488.1	Murine-specific	2-qE1-35981.1	Eutherian	chr10:62676286-62676316:+	TTTAATCCCAGTTCTCGGGAGTTTGAGAGC	chr2:92568284-92568324:-	TTTAATCCCAGCACTCAGAAGGCAGAGGCAGGTGAATCTC	40	1	87	1
11-qE1-9443.1	Murine-specific	2-qE1-35981.1	Eutherian	chr11:103447005-103447031:+	TTTAATCCCAGGACCCGGAAAGCAAA	chr2:92568284-92568324:-	TTTAATCCCAGCACTCAGAAGGCAGAGGCAGGTGAATCTC	55	1	87	1
11-qE1-9443.1	Murine-specific	2-qE1-35981.1	Eutherian	chr11:103447005-103447032:+	TTTAATCCCAGGACCCGGAAAGCAAAG	chr2:92568284-92568324:-	TTTAATCCCAGCACTCAGAAGGCAGAGGCAGGTGAATCTC	72	1	87	1
11-qE1-9443.1	Murine-specific	2-qE1-35981.1	Eutherian	chr11:103447005-103447033:+	TTTAATCCCAGGACCCGGAAAGCAAAGG	chr2:92568284-92568324:-	TTTAATCCCAGCACTCAGAAGGCAGAGGCAGGTGAATCTC	61	1	87	1
11-qE1-9443.1	Murine-specific	2-qE1-35981.1	Eutherian	chr11:103447005-103447033:+	TTTAATCCCAGGACCCGGAAAGCAAAGT	chr2:92568284-92568324:-	TTTAATCCCAGCACTCAGAAGGCAGAGGCAGGTGAATCTC	63	1	87	1
11-qE1-9443.1	Murine-specific	2-qE1-35981.1	Eutherian	chr11:103447005-103447034:+	TTTAATCCCAGGACCCGGAAAGCAAAGGC	chr2:92568284-92568324:-	TTTAATCCCAGCACTCAGAAGGCAGAGGCAGGTGAATCTC	348	1	87	1
11-qE1-9443.1	Murine-specific	2-qE1-35981.1	Eutherian	chr11:103447005-103447035:+	TTTAATCCCAGGACCCGGAAAGCAAAGGCA	chr2:92568284-92568324:-	TTTAATCCCAGCACTCAGAAGGCAGAGGCAGGTGAATCTC	192	1	87	1
11-qE1-9443.1	Murine-specific	2-qE1-35981.1	Eutherian	chr11:103447005-103447036:+	TTTAATCCCAGGACCCGGAAAGCAAAGGCAG	chr2:92568284-92568324:-	TTTAATCCCAGCACTCAGAAGGCAGAGGCAGGTGAATCTC	53	1	87	1
11-qE1-9443.1	Murine-specific	2-qE1-35981.1	Eutherian	chr11:103447005-103447037:+	TTTAATCCCAGGACCCGGAAAGCAAAGGCAGT	chr2:92568284-92568324:-	TTTAATCCCAGCACTCAGAAGGCAGAGGCAGGTGAATCTC	33	1	87	1
17-qA3.3-27363.1	Eutherian	2-qE1-35981.1	Eutherian	chr17:27297330-27297360:-	TTTAATCCCAGCACTCACGCAGAAAAGGCA	chr2:92568284-92568324:-	TTTAATCCCAGCACTCAGAAGGCAGAGGCAGGTGAATCTC	34	1	87	1
3-qA2-617.1	Mouse-specific	2-qE1-35981.1	Eutherian	chr3:20483713-20483744:-	TTTAATCCCAGATCTCTGAGGTCATCCTGGA	chr2:92568284-92568324:-	TTTAATCCCAGCACTCAGAAGGCAGAGGCAGGTGAATCTC	69	1	87	1
3-qA2-617.1	Mouse-specific	2-qE1-35981.1	Eutherian	chr3:20483714-20483744:-	TTTAATCCCAGATCTCTGAGGTCATCCTGT	chr2:92568284-92568324:-	TTTAATCCCAGCACTCAGAAGGCAGAGGCAGGTGAATCTC	49	1	87	1
3-qA2-617.1	Mouse-specific	2-qE1-35981.1	Eutherian	chr3:20483716-20483744:-	TTTAATCCCAGATCTCTGAGGTCATCCT	chr2:92568284-92568324:-	TTTAATCCCAGCACTCAGAAGGCAGAGGCAGGTGAATCTC	34	1	87	1
5-qF-14224.1	Eutherian	2-qE1-35981.1	Eutherian	chr5:113343582-113343610:+	TTTAATCCCAGCTCTTGGGAGGCGGAGG	chr2:92568284-92568324:-	TTTAATCCCAGCACTCAGAAGGCAGAGGCAGGTGAATCTC	253	4	87	1
5-qF-14224.1	Eutherian	2-qE1-35981.1	Eutherian	chr5:113343582-113343611:+	TTTAATCCCAGCTCTTGGGAGGCGGAGGC	chr2:92568284-92568324:-	TTTAATCCCAGCACTCAGAAGGCAGAGGCAGGTGAATCTC	174	4	87	1
10-qB4-6488.1	Murine-specific	15-qE1-8387.1	Eutherian	chr10:62676491-62676517:+	TACCAACTGAACAGCATCCCCAGTCC	chr15:78666427-78666467:+	TACCAACTGAACCACACACCCAGCCCTTAAAAATTCTTAA	112	1	16	1
10-qB4-6488.1	Murine-specific	15-qE1-8387.1	Eutherian	chr10:62676491-62676518:+	TACCAACTGAACAGCATCCCCAGTCCC	chr15:78666427-78666467:+	TACCAACTGAACCACACACCCAGCCCTTAAAAATTCTTAA	259	1	16	1
10-qB4-6488.1	Murine-specific	15-qE1-8387.1	Eutherian	chr10:62676491-62676519:+	TACCAACTGAACAGCATCCCCAGTCCCT	chr15:78666427-78666467:+	TACCAACTGAACCACACACCCAGCCCTTAAAAATTCTTAA	31	1	16	1
10-qB4-6488.1	Murine-specific	15-qE1-8387.1	Eutherian	chr10:62676491-62676522:+	TACCAACTGAACAGCATCCCCAGTCCCAGTC	chr15:78666427-78666467:+	TACCAACTGAACCACACACCCAGCCCTTAAAAATTCTTAA	236	1	16	1
17-qA3.3-27363.1	Eutherian	15-qE1-8387.1	Eutherian	chr17:27294814-27294845:-	TACCAACTGAGCCACATCCCCAGATTTGAGA	chr15:78666427-78666467:+	TACCAACTGAACCACACACCCAGCCCTTAAAAATTCTTAA	177	1	16	1
17-qA3.3-27363.1	Eutherian	15-qE1-8387.1	Eutherian	chr17:27294815-27294845:-	TACCAACTGAGCCACATCCCCAGATTTGAG	chr15:78666427-78666467:+	TACCAACTGAACCACACACCCAGCCCTTAAAAATTCTTAA	58	1	16	1
17-qA3.3-27363.1	Eutherian	15-qE1-8387.1	Eutherian	chr17:27294816-27294845:-	TACCAACTGAGCCACATCCCCAGATTTGA	chr15:78666427-78666467:+	TACCAACTGAACCACACACCCAGCCCTTAAAAATTCTTAA	251	1	16	1
17-qA3.3-27363.1	Eutherian	15-qE1-8387.1	Eutherian	chr17:27294816-27294845:-	TACCAACTGAGCCACATCCCCAGATTTGT	chr15:78666427-78666467:+	TACCAACTGAACCACACACCCAGCCCTTAAAAATTCTTAA	84	1	16	1
17-qA3.3-27363.1	Eutherian	15-qE1-8387.1	Eutherian	chr17:27294818-27294845:-	TACCAACTGAGCCACATCCCCAGATTT	chr15:78666427-78666467:+	TACCAACTGAACCACACACCCAGCCCTTAAAAATTCTTAA	58	1	16	1
17-qA3.3-27363.1	Eutherian	15-qE1-8387.1	Eutherian	chr17:27294819-27294845:-	TACCAACTGAGCCACATCCCCAGATT	chr15:78666427-78666467:+	TACCAACTGAACCACACACCCAGCCCTTAAAAATTCTTAA	105	1	16	1
11-qE1-9443.1	Murine-specific	14-qA3-19970.1	Murine-specific	chr11:103441805-103441834:+	TAAGAAAGCAGGCCTAGCAAGCCATGGGG	chr14:24117159-24117199:-	TAAGAAAGCAGACTGAGGAAGCCAGAGTCAGTGAGGAGCA	44	1	43	1
11-qE1-9443.1	Murine-specific	14-qA3-19970.1	Murine-specific	chr11:103441805-103441836:+	TAAGAAAGCAGGCCTAGCAAGCCATGGGGAG	chr14:24117159-24117199:-	TAAGAAAGCAGACTGAGGAAGCCAGAGTCAGTGAGGAGCA	44	1	43	1
15-qD1-4001.1	Murine-specific	14-qA3-19970.1	Murine-specific	chr15:59286561-59286590:+	TAAGAAAGCAAGCTGAGCAAGCCACAAGA	chr14:24117159-24117199:-	TAAGAAAGCAGACTGAGGAAGCCAGAGTCAGTGAGGAGCA	203	3	43	1
15-qD1-4001.1	Murine-specific	14-qA3-19970.1	Murine-specific	chr15:59286561-59286591:+	TAAGAAAGCAAGCTGAGCAAGCCACAAGAA	chr14:24117159-24117199:-	TAAGAAAGCAGACTGAGGAAGCCAGAGTCAGTGAGGAGCA	104	2	43	1
6-qF3-28913.1	Murine-specific	4-qC5-17839.1	Eutherian	chr6:127807936-127807965:+	TAGTATCATGGGGTGGATGGTTTTCACTC	chr4:94322245-94322285:+	CAGTATCAGGGGTTGGACAGTCACACTGTCGAGCTAAAGC	32	1	45	1
7-qD1-19431.1	Eutherian	18-qE1-36451.1	Eutherian	chr7:73113592-73113620:+	TGTAATCCCAGCATTCTGGAGGTGGAGG	chr18:67036986-67037026:+	TGTAATCCCAGCATGCAGGAAGGTGAGGGAGAAGAATCTT	101	1	16	1
7-qD1-19431.1	Eutherian	18-qE1-36451.1	Eutherian	chr7:73113592-73113621:+	TGTAATCCCAGCATTCTGGAGGTGGAGGC	chr18:67036986-67037026:+	TGTAATCCCAGCATGCAGGAAGGTGAGGGAGAAGAATCTT	78	1	16	1
15-qD1-17920.1	Eutherian	5-qF-14508.1	Eutherian	chr15:59271739-59271767:-	CACACAGCCACACCCCCAAGCTCCCTCT	chr5:113337805-113337845:+	CACACAGCTACCCCCCCAAAGTCTTATAATCCCATTTATA	53	1	15	1
15-qD1-17920.1	Eutherian	5-qF-14508.1	Eutherian	chr15:59271741-59271767:-	CACACAGCCACACCCCCAAGCTCCCT	chr5:113337805-113337845:+	CACACAGCTACCCCCCCAAAGTCTTATAATCCCATTTATA	38	1	15	1
9-qC-31469.1	Murine-specific	11-qE1-9443.1	Murine-specific	chr9:67709211-67709242:-	TACCATATGGAAAGGTGGGAGATATCGGAGT	chr11:103433971-103434011:-	TACCATATGAAAAGATGGAGGAACAGGGCTTCCGTGGGAC	62	1	65	1
9-qC-31469.1	Murine-specific	11-qE1-9443.1	Murine-specific	chr9:67709212-67709242:-	TACCATATGGAAAGGTGGGAGATATCGGAG	chr11:103433971-103434011:-	TACCATATGAAAAGATGGAGGAACAGGGCTTCCGTGGGAC	100	1	65	1
9-qC-31469.1	Murine-specific	11-qE1-9443.1	Murine-specific	chr9:67709213-67709242:-	TACCATATGGAAAGGTGGGAGATATCGGA	chr11:103433971-103434011:-	TACCATATGAAAAGATGGAGGAACAGGGCTTCCGTGGGAC	230	1	65	1
17-qA3.3-26735.1	Eutherian	7-qD1-16444.1	Eutherian	chr17:27348749-27348773:+	TAGAGTTCCTGGTCTTTAATTTGC	chr7:69910824-69910864:-	TAGAGTTCCTGCCCTTTAATTTTAAGACTGGGCTTGGGGG	31	1	25	1
17-qA3.3-26735.1	Eutherian	7-qD1-16444.1	Eutherian	chr17:27348749-27348774:+	TAGAGTTCCTGGTCTTTAATTTGCA	chr7:69910824-69910864:-	TAGAGTTCCTGCCCTTTAATTTTAAGACTGGGCTTGGGGG	36	1	25	1
17-qA3.3-26735.1	Eutherian	7-qD1-16444.1	Eutherian	chr17:27348749-27348774:+	TAGAGTTCCTGGTCTTTAATTTGCC	chr7:69910824-69910864:-	TAGAGTTCCTGCCCTTTAATTTTAAGACTGGGCTTGGGGG	78	1	25	1
17-qA3.3-26735.1	Eutherian	7-qD1-16444.1	Eutherian	chr17:27348749-27348775:+	TAGAGTTCCTGGTCTTTAATTTGCCA	chr7:69910824-69910864:-	TAGAGTTCCTGCCCTTTAATTTTAAGACTGGGCTTGGGGG	139	1	25	1
2-qF1-2536.1	Murine-specific	6-qC3-6258.1	Murine-specific	chr2:127693671-127693695:+	TGTGACTGACACCCCACTTGTCCT	chr6:81895756-81895796:+	TGTGACTGATACTCCACTTATGCTTCCCTAGTGCTTAGGC	109	1	146	1
2-qF1-2536.1	Murine-specific	6-qC3-6258.1	Murine-specific	chr2:127693671-127693697:+	TGTGACTGACACCCCACTTGTCCTTG	chr6:81895756-81895796:+	TGTGACTGATACTCCACTTATGCTTCCCTAGTGCTTAGGC	100	1	146	1
2-qF1-2536.1	Murine-specific	6-qC3-6258.1	Murine-specific	chr2:127693671-127693698:+	TGTGACTGACACCCCACTTGTCCTTGC	chr6:81895756-81895796:+	TGTGACTGATACTCCACTTATGCTTCCCTAGTGCTTAGGC	372	1	146	1
2-qF1-2536.1	Murine-specific	6-qC3-6258.1	Murine-specific	chr2:127693671-127693699:+	TGTGACTGACACCCCACTTGTCCTTGCC	chr6:81895756-81895796:+	TGTGACTGATACTCCACTTATGCTTCCCTAGTGCTTAGGC	547	1	146	1
2-qF1-2536.1	Murine-specific	6-qC3-6258.1	Murine-specific	chr2:127693671-127693700:+	TGTGACTGACACCCCACTTGTCCTTGCCT	chr6:81895756-81895796:+	TGTGACTGATACTCCACTTATGCTTCCCTAGTGCTTAGGC	866	1	146	1
2-qF1-2536.1	Murine-specific	6-qC3-6258.1	Murine-specific	chr2:127693671-127693701:+	TGTGACTGACACCCCACTTGTCCTTGCCTT	chr6:81895756-81895796:+	TGTGACTGATACTCCACTTATGCTTCCCTAGTGCTTAGGC	149	1	146	1
2-qF1-2536.1	Murine-specific	6-qC3-6258.1	Murine-specific	chr2:127693671-127693701:+	TGTGACTGACACCCCACTTGTCCTTGCCTG	chr6:81895756-81895796:+	TGTGACTGATACTCCACTTATGCTTCCCTAGTGCTTAGGC	2567	1	146	1
2-qF1-2536.1	Murine-specific	6-qC3-6258.1	Murine-specific	chr2:127693671-127693701:+	TGTGACTGACACCTCACTTGTCCTTGCCTG	chr6:81895756-81895796:+	TGTGACTGATACTCCACTTATGCTTCCCTAGTGCTTAGGC	32	1	146	1
2-qF1-2536.1	Murine-specific	6-qC3-6258.1	Murine-specific	chr2:127693671-127693702:+	TGTGACTGACACCCCACTTGTCCTTGCCTGT	chr6:81895756-81895796:+	TGTGACTGATACTCCACTTATGCTTCCCTAGTGCTTAGGC	424	1	146	1
2-qF1-2536.1	Murine-specific	6-qC3-6258.1	Murine-specific	chr2:127693671-127693702:+	TGTGACTGACACCCCACTTGTCCTTGCCTGC	chr6:81895756-81895796:+	TGTGACTGATACTCCACTTATGCTTCCCTAGTGCTTAGGC	472	1	146	1
13-qA3.1-213.1	Mouse-specific	5-qG2-950.1	Murine-specific	chr13:21504960-21504989:-	AGAGAATTCACACTGGAGAAAAACGCTAT	chr5:136936831-136936871:-	AGAGAATTCACACTGGAGAAAAGCCCTATGCTCGGGAAGG	40	1	53	1
13-qA3.1-213.1	Mouse-specific	5-qG2-950.1	Murine-specific	chr13:21504961-21504989:-	AGAGAATTCACACTGGAGAAAAACGCTA	chr5:136936831-136936871:-	AGAGAATTCACACTGGAGAAAAGCCCTATGCTCGGGAAGG	47	1	53	1
13-qA3.1-213.1	Mouse-specific	5-qG2-950.1	Murine-specific	chr13:21504962-21504989:-	AGAGAATTCACACTGGAGAAAAACGCT	chr5:136936831-136936871:-	AGAGAATTCACACTGGAGAAAAGCCCTATGCTCGGGAAGG	166	1	53	1
13-qA3.1-213.1	Mouse-specific	5-qG2-950.1	Murine-specific	chr13:21504963-21504989:-	AGAGAATTCACACTGGAGAAAAACGC	chr5:136936831-136936871:-	AGAGAATTCACACTGGAGAAAAGCCCTATGCTCGGGAAGG	40	1	53	1
18-qE1-1295.1	Mouse-specific	2-qF1-2536.1	Murine-specific	chr18:67072317-67072347:+	TATGAACTAATCAGTACCCCCCGAGCTTGT	chr2:127700805-127700845:-	TATGAACTAACCAGTACTCCCAGAGTTCGTGTCTCTAGCT	95	2	80	1
9-qA5.3-24188.1	Eutherian	2-qF1-2536.1	Murine-specific	chr9:54207400-54207431:-	TATGAACTAACCAGCACCCCCAGACCTCGTG	chr2:127700805-127700845:-	TATGAACTAACCAGTACTCCCAGAGTTCGTGTCTCTAGCT	47	1	80	1
9-qA5.3-24188.1	Eutherian	2-qF1-2536.1	Murine-specific	chr9:54207401-54207431:-	TATGAACTAACCAGCACCCCCAGACCTCGT	chr2:127700805-127700845:-	TATGAACTAACCAGTACTCCCAGAGTTCGTGTCTCTAGCT	120	1	80	1
9-qA5.3-24188.1	Eutherian	2-qF1-2536.1	Murine-specific	chr9:54207402-54207431:-	TATGAACTAACCAGCACCCCCAGACCTCG	chr2:127700805-127700845:-	TATGAACTAACCAGTACTCCCAGAGTTCGTGTCTCTAGCT	47	1	80	1
15-qD1-4001.1	Murine-specific	17-qA3.3-27363.1	Eutherian	chr15:59289704-59289731:+	TTGCTAGGTAACTGGGAGGAGTCTAGA	chr17:27306854-27306894:+	TTGCTAGGTAACTGGGAAGAGTCTAGCCTGAAGGTCAGAA	138	2	18	1
15-qD1-4001.1	Murine-specific	17-qA3.3-27363.1	Eutherian	chr15:59289704-59289733:+	TTGCTAGGTAACTGGGAGGAGTCTAGACT	chr17:27306854-27306894:+	TTGCTAGGTAACTGGGAAGAGTCTAGCCTGAAGGTCAGAA	1181	2	18	1
15-qD1-17920.1	Eutherian	4-qC5-17839.1	Eutherian	chr15:59254330-59254360:-	TACCAGAAAGAAGAATGACTCTGGGCACTT	chr4:94298117-94298157:+	AACCAGAAAGAAGAAAAACAAATGGGCACTATATGACAAA	69	1	41	1
15-qD1-17920.1	Eutherian	4-qC5-17839.1	Eutherian	chr15:59254331-59254360:-	TACCAGAAAGAAGAATGACTCTGGGCACT	chr4:94298117-94298157:+	AACCAGAAAGAAGAAAAACAAATGGGCACTATATGACAAA	810	1	41	1
7-qD2-24830.1	Eutherian	5-qF-14508.1	Eutherian	chr7:73804943-73804973:-	AACTTGACTACATCTGGAATTAACTAAAAC	chr5:113330125-113330165:+	AACTTGACTACCTCTGAAATGAACTACAATCCAGAACTTC	2301	61	111	1
5-qF-14508.1	Eutherian	18-qE1-1295.1	Mouse-specific	chr5:113328028-113328059:-	TAAGATAGTACTTTTCCACTAAGGCCAAGAC	chr18:67067814-67067854:-	TAAGATATTATTTTACCACAAGAGACAGTAATAAAGATTT	46	1	15	1
5-qF-14508.1	Eutherian	18-qE1-1295.1	Mouse-specific	chr5:113328030-113328059:-	TAAGATAGTACTTTTCCACTAAGGCCAAG	chr18:67067814-67067854:-	TAAGATATTATTTTACCACAAGAGACAGTAATAAAGATTT	132	1	15	1
5-qF-14508.1	Eutherian	18-qE1-1295.1	Mouse-specific	chr5:113328032-113328059:-	TAAGATAGTACTTTTCCACTAAGGCCA	chr18:67067814-67067854:-	TAAGATATTATTTTACCACAAGAGACAGTAATAAAGATTT	66	1	15	1
10-qB4-6488.1	Murine-specific	14-qA3-3095.1	Mouse-specific	chr10:62661908-62661933:+	TACAGAGTGAGTTCCAGAACAGACT	chr14:19638221-19638261:+	TACAGAGTAAGTTCCAGGACAGGCAGTGAAGGAGTTGGAA	55	1	15	1
10-qB4-6488.1	Murine-specific	14-qA3-3095.1	Mouse-specific	chr10:62661908-62661934:+	TACAGAGTGAGTTCCAGAACAGACTG	chr14:19638221-19638261:+	TACAGAGTAAGTTCCAGGACAGGCAGTGAAGGAGTTGGAA	157	1	15	1
10-qB4-6488.1	Murine-specific	14-qA3-3095.1	Mouse-specific	chr10:62661908-62661935:+	TACAGAGTGAGTTCCAGAACAGACTGA	chr14:19638221-19638261:+	TACAGAGTAAGTTCCAGGACAGGCAGTGAAGGAGTTGGAA	430	1	15	1
10-qB4-6488.1	Murine-specific	14-qA3-3095.1	Mouse-specific	chr10:62661908-62661936:+	TACAGAGTGAGTTCCAGAACAGACTGAG	chr14:19638221-19638261:+	TACAGAGTAAGTTCCAGGACAGGCAGTGAAGGAGTTGGAA	139	1	15	1
10-qB4-6488.1	Murine-specific	14-qA3-3095.1	Mouse-specific	chr10:62661908-62661937:+	TACAGAGTGAGTTCCAGAACAGACTGAGC	chr14:19638221-19638261:+	TACAGAGTAAGTTCCAGGACAGGCAGTGAAGGAGTTGGAA	147	1	15	1
10-qB4-6488.1	Murine-specific	14-qA3-3095.1	Mouse-specific	chr10:62661908-62661938:+	TACAGAGTGAGTTCCAGAACAGACTGAGCT	chr14:19638221-19638261:+	TACAGAGTAAGTTCCAGGACAGGCAGTGAAGGAGTTGGAA	208	1	15	1
11-qE1-9443.1	Murine-specific	14-qA3-3095.1	Mouse-specific	chr11:103429608-103429636:+	TACAGAGTGAGTTCCAGGACAGCGCCAG	chr14:19638221-19638261:+	TACAGAGTAAGTTCCAGGACAGGCAGTGAAGGAGTTGGAA	162	2	15	1
11-qE1-9443.1	Murine-specific	14-qA3-3095.1	Mouse-specific	chr11:103447069-103447097:+	TACAGAGTGAGTTCTAGGACAGTGAGAC	chr14:19638221-19638261:+	TACAGAGTAAGTTCCAGGACAGGCAGTGAAGGAGTTGGAA	86	1	15	1
11-qE1-9443.1	Murine-specific	14-qA3-3095.1	Mouse-specific	chr11:103447069-103447098:+	TACAGAGTGAGTTCTAGGACAGTGAGACT	chr14:19638221-19638261:+	TACAGAGTAAGTTCCAGGACAGGCAGTGAAGGAGTTGGAA	82	1	15	1
11-qE1-9443.1	Murine-specific	14-qA3-3095.1	Mouse-specific	chr11:103447069-103447099:+	TACAGAGTGAGTTCTAGGACAGTGAGACTC	chr14:19638221-19638261:+	TACAGAGTAAGTTCCAGGACAGGCAGTGAAGGAGTTGGAA	703	1	15	1
9-qC-10667.1	Eutherian	14-qA3-3095.1	Mouse-specific	chr9:67754231-67754259:+	TACAGAGTGAGTTCCAGGACAGCCATAC	chr14:19638221-19638261:+	TACAGAGTAAGTTCCAGGACAGGCAGTGAAGGAGTTGGAA	185	3	15	1
9-qC-10667.1	Eutherian	14-qA3-3095.1	Mouse-specific	chr9:67754231-67754260:+	TACAGAGTGAGTTCCAGGACAGCCATACA	chr14:19638221-19638261:+	TACAGAGTAAGTTCCAGGACAGGCAGTGAAGGAGTTGGAA	834	2	15	1
9-qC-10667.1	Eutherian	14-qA3-3095.1	Mouse-specific	chr9:67754231-67754261:+	TACAGAGTGAGTTCCAGGACAGCCATACAG	chr14:19638221-19638261:+	TACAGAGTAAGTTCCAGGACAGGCAGTGAAGGAGTTGGAA	83	1	15	1
2-qE1-35981.1	Eutherian	7-qD1-9417.1	Murine-specific	chr2:92563455-92563482:+	TCTTCTTGAACCTCTGGGATCTGCCCC	chr7:69904848-69904888:+	GCTTCTTGGACCTCTGGCCTTGGAGACTAAGAACCCAGAC	58	1	19	1
6-qF3-28913.1	Murine-specific	10-qB4-6488.1	Murine-specific	chr6:127812269-127812299:+	TCAGTGGTTAAGAGTGCTTGCTGCTCTTAC	chr10:62659140-62659180:-	TCAGTGGTTAAGAGCACTGCCTGCACTTCCAAAGGTCCTG	93	3	17	1
9-qA5.3-1495.1	Murine-specific	10-qB4-6488.1	Murine-specific	chr9:54251323-54251353:+	TCAGTGGTTAAGAGCATTTGCTAATCTGTA	chr10:62659140-62659180:-	TCAGTGGTTAAGAGCACTGCCTGCACTTCCAAAGGTCCTG	56	1	17	1
17-qE1.1-7037.1	Mouse-specific	14-qA3-284.1	Mouse-specific	chr17:66224555-66224579:+	TGGAAGTGTAAGCCAAAGGAACCC	chr14:24417794-24417834:+	TGGAAGTGTAAGCTGAATAAACCCTTTCCTCCCCAACTTG	40	1	15	1
17-qE1.1-7037.1	Mouse-specific	14-qA3-284.1	Mouse-specific	chr17:66224555-66224580:+	TGGAAGTGTAAGCCAAAGGAACCCT	chr14:24417794-24417834:+	TGGAAGTGTAAGCTGAATAAACCCTTTCCTCCCCAACTTG	50	1	15	1
17-qE1.1-7037.1	Mouse-specific	14-qA3-284.1	Mouse-specific	chr17:66224555-66224581:+	TGGAAGTGTAAGCCAAAGGAACCCTT	chr14:24417794-24417834:+	TGGAAGTGTAAGCTGAATAAACCCTTTCCTCCCCAACTTG	32	1	15	1
17-qE1.1-7037.1	Mouse-specific	14-qA3-284.1	Mouse-specific	chr17:66224555-66224583:+	TGGAAGTGTAAGCCAAAGGAACCCTTTG	chr14:24417794-24417834:+	TGGAAGTGTAAGCTGAATAAACCCTTTCCTCCCCAACTTG	103	1	15	1
17-qE1.1-7037.1	Mouse-specific	14-qA3-284.1	Mouse-specific	chr17:66224555-66224584:+	TGGAAGTGTAAGCCAAAGGAACCCTTTGC	chr14:24417794-24417834:+	TGGAAGTGTAAGCTGAATAAACCCTTTCCTCCCCAACTTG	468	1	15	1
17-qE1.1-7037.1	Mouse-specific	14-qA3-284.1	Mouse-specific	chr17:66224555-66224585:+	TGGAAGTGTAAGCCAAAGGAACCCTTTGCC	chr14:24417794-24417834:+	TGGAAGTGTAAGCTGAATAAACCCTTTCCTCCCCAACTTG	895	1	15	1
17-qE1.1-7037.1	Mouse-specific	14-qA3-284.1	Mouse-specific	chr17:66224555-66224586:+	TGGAAGTGTAAGCCAAAGGAACCCTTTGCCC	chr14:24417794-24417834:+	TGGAAGTGTAAGCTGAATAAACCCTTTCCTCCCCAACTTG	1320	1	15	1
17-qE1.1-7037.1	Mouse-specific	14-qA3-284.1	Mouse-specific	chr17:66224555-66224586:+	TGGAAGTGTAAGCCAAAGGAACCCTTTGCCT	chr14:24417794-24417834:+	TGGAAGTGTAAGCTGAATAAACCCTTTCCTCCCCAACTTG	329	1	15	1
17-qE1.1-7037.1	Mouse-specific	14-qA3-284.1	Mouse-specific	chr17:66224555-66224587:+	TGGAAGTGTAAGCCAAAGGAACCCTTTGCCCC	chr14:24417794-24417834:+	TGGAAGTGTAAGCTGAATAAACCCTTTCCTCCCCAACTTG	299	1	15	1
17-qE1.1-7037.1	Mouse-specific	14-qA3-284.1	Mouse-specific	chr17:66224555-66224587:+	TGGAAGTGTAAGCCAAAGGAACCCTTTGCCCT	chr14:24417794-24417834:+	TGGAAGTGTAAGCTGAATAAACCCTTTCCTCCCCAACTTG	52	1	15	1
5-qF-14224.1	Eutherian	14-qC1-1010.1	Mouse-specific	chr5:113350184-113350212:+	TATATGTTGAGCCTCCAGCTGTTCTTGC	chr14:44929802-44929842:-	TATATGTTGAGCCTCCATCTGCTCTTGTACCAGTTGCTCA	71	1	20	1
5-qF-14224.1	Eutherian	14-qC1-1010.1	Mouse-specific	chr5:113350184-113350213:+	TATATGTTGAGCCTCCAGCTGTTCTTGCA	chr14:44929802-44929842:-	TATATGTTGAGCCTCCATCTGCTCTTGTACCAGTTGCTCA	272	1	20	1
5-qF-14224.1	Eutherian	14-qC1-1010.1	Mouse-specific	chr5:113350184-113350214:+	TATATGTTGAGCCTCCAGCTGTTCTTGCAC	chr14:44929802-44929842:-	TATATGTTGAGCCTCCATCTGCTCTTGTACCAGTTGCTCA	1829	1	20	1
5-qF-14224.1	Eutherian	14-qC1-1010.1	Mouse-specific	chr5:113350184-113350215:+	TATATGTTGAGCCTCCAGCTGTTCTTGCACT	chr14:44929802-44929842:-	TATATGTTGAGCCTCCATCTGCTCTTGTACCAGTTGCTCA	217	1	20	1
5-qF-14224.1	Eutherian	14-qC1-1010.1	Mouse-specific	chr5:113350184-113350215:+	TATATGTTGAGCCTCCACCTGTTCTTGCACC	chr14:44929802-44929842:-	TATATGTTGAGCCTCCATCTGCTCTTGTACCAGTTGCTCA	33	1	20	1
5-qF-14224.1	Eutherian	14-qC1-1010.1	Mouse-specific	chr5:113350184-113350215:+	TATATGTTTAGCCTCCAGCTGTTCTTGCACC	chr14:44929802-44929842:-	TATATGTTGAGCCTCCATCTGCTCTTGTACCAGTTGCTCA	36	1	20	1
5-qF-14224.1	Eutherian	14-qC1-1010.1	Mouse-specific	chr5:113350184-113350215:+	TATATGTTGAGCCTCCAGCTGTTCTTGCACC	chr14:44929802-44929842:-	TATATGTTGAGCCTCCATCTGCTCTTGTACCAGTTGCTCA	6838	1	20	1
5-qF-14224.1	Eutherian	14-qC1-1010.1	Mouse-specific	chr5:113350184-113350216:+	TATATGTTGAGCCTCCAGCTGTTCTTGCACCT	chr14:44929802-44929842:-	TATATGTTGAGCCTCCATCTGCTCTTGTACCAGTTGCTCA	140	1	20	1
5-qF-14224.1	Eutherian	14-qC1-1010.1	Mouse-specific	chr5:113350184-113350216:+	TATATGTTGAGCCTCCAGCTGTTCTTGCACCA	chr14:44929802-44929842:-	TATATGTTGAGCCTCCATCTGCTCTTGTACCAGTTGCTCA	261	1	20	1
4-qB3-639.1	Mouse-specific	15-qD1-17920.1	Eutherian	chr4:62223844-62223873:-	GAAACTGTGATGTGCTGTGTGATGTGACT	chr15:59258303-59258343:+	TAAACTGTGGTGGGCTGTGGAAGTGATAGTGGTATTTCAT	78	2	22	1
4-qB3-277.1	Mouse-specific	15-qD1-17920.1	Eutherian	chr4:62235657-62235686:+	GAAACTGTGATGTGCTGTGTGATGTGACT	chr15:59258303-59258343:+	TAAACTGTGGTGGGCTGTGGAAGTGATAGTGGTATTTCAT	78	2	22	1
10-qB4-6488.1	Murine-specific	2-qE1-35981.1	Eutherian	chr10:62680327-62680351:+	TCACTATGTAGACTAAGCTGGCTC	chr2:92577740-92577780:-	TCACTATGTAGCCCAGGCTGACCTCAAACTCCCAATTCTC	38	1	61	1
10-qB4-6488.1	Murine-specific	2-qE1-35981.1	Eutherian	chr10:62680327-62680356:+	TCACTATGTAGACTAAGCTGGCTCGGAGT	chr2:92577740-92577780:-	TCACTATGTAGCCCAGGCTGACCTCAAACTCCCAATTCTC	204	1	61	1
10-qB4-6488.1	Murine-specific	2-qE1-35981.1	Eutherian	chr10:62680327-62680357:+	TCACTATGTAGACTAAGCTGGCTCGGAGTT	chr2:92577740-92577780:-	TCACTATGTAGCCCAGGCTGACCTCAAACTCCCAATTCTC	152	1	61	1
4-qD2.2-2182.1	Murine-specific	2-qE1-35981.1	Eutherian	chr4:123835286-123835317:-	TCACTATGTAGCCCTGACTAGCCTGGAAACC	chr2:92577740-92577780:-	TCACTATGTAGCCCAGGCTGACCTCAAACTCCCAATTCTC	341	1	61	1
4-qD2.2-2182.1	Murine-specific	2-qE1-35981.1	Eutherian	chr4:123835287-123835317:-	TCACTATGTAGCCCTGACTAGCCTGGAAAC	chr2:92577740-92577780:-	TCACTATGTAGCCCAGGCTGACCTCAAACTCCCAATTCTC	519	1	61	1
4-qD2.2-2182.1	Murine-specific	2-qE1-35981.1	Eutherian	chr4:123835288-123835317:-	TCACTATGTAGCCCTGACTAGCCTGGAAA	chr2:92577740-92577780:-	TCACTATGTAGCCCAGGCTGACCTCAAACTCCCAATTCTC	161	1	61	1
4-qD2.2-2182.1	Murine-specific	2-qE1-35981.1	Eutherian	chr4:123835289-123835317:-	TCACTATGTAGCCCTGACTAGCCTGGAA	chr2:92577740-92577780:-	TCACTATGTAGCCCAGGCTGACCTCAAACTCCCAATTCTC	234	2	61	1
4-qD2.2-2182.1	Murine-specific	2-qE1-35981.1	Eutherian	chr4:123835290-123835317:-	TCACTATGTAGCCCTGACTAGCCTGGA	chr2:92577740-92577780:-	TCACTATGTAGCCCAGGCTGACCTCAAACTCCCAATTCTC	228	3	61	1
4-qD2.2-2182.1	Murine-specific	2-qE1-35981.1	Eutherian	chr4:123835291-123835317:-	TCACTATGTAGCCCTGACTAGCCTGG	chr2:92577740-92577780:-	TCACTATGTAGCCCAGGCTGACCTCAAACTCCCAATTCTC	110	3	61	1
7-qD1-654.1	Murine-specific	2-qE1-35981.1	Eutherian	chr7:73101027-73101056:-	TCACTATGTAGCCTTGGCTGGTCTGGAAC	chr2:92577740-92577780:-	TCACTATGTAGCCCAGGCTGACCTCAAACTCCCAATTCTC	163	5	61	1
15-qD1-4001.1	Murine-specific	2-qE1-35981.1	Eutherian	chr15:59289269-59289297:+	CAGGTTCTCAGTCTCTGGCATCCCATCC	chr2:92561037-92561077:-	CAGGTTCTCAGTCTCCAGCATTCCACGCTGGATACAGCAG	114	1	56	1
15-qD1-4001.1	Murine-specific	2-qE1-35981.1	Eutherian	chr15:59289269-59289298:+	CAGGTTCTCAGTCTCTGGCATCCCATCCT	chr2:92561037-92561077:-	CAGGTTCTCAGTCTCCAGCATTCCACGCTGGATACAGCAG	322	1	56	1
15-qD1-4001.1	Murine-specific	2-qE1-35981.1	Eutherian	chr15:59289269-59289299:+	CAGGTTCTCAGTCTCTGGCATCCCATCCTG	chr2:92561037-92561077:-	CAGGTTCTCAGTCTCCAGCATTCCACGCTGGATACAGCAG	129	1	56	1
15-qD1-4001.1	Murine-specific	2-qE1-35981.1	Eutherian	chr15:59289269-59289299:+	CAGGTTCTCAGTCTCTGGCATCCCATCCTT	chr2:92561037-92561077:-	CAGGTTCTCAGTCTCCAGCATTCCACGCTGGATACAGCAG	55	1	56	1
6-qC3-6258.1	Murine-specific	2-qF1-2536.1	Murine-specific	chr6:81895735-81895766:-	ATCAGTCACAGGAAAGGAAATGGAAACTGCT	chr2:127693641-127693681:-	GTCAGTCACAGGAAACGGAAACTGCAGGCATCTCCCATGA	512	1	289	1
6-qC3-6258.1	Murine-specific	2-qF1-2536.1	Murine-specific	chr6:81895735-81895766:-	ATCAGTCACAGGAAAGGAAATGGAAACTGCA	chr2:127693641-127693681:-	GTCAGTCACAGGAAACGGAAACTGCAGGCATCTCCCATGA	55	1	289	1
6-qC3-6258.1	Murine-specific	2-qF1-2536.1	Murine-specific	chr6:81895736-81895766:-	ATCAGTCACAGGAAAGGAAATGGAAACTGT	chr2:127693641-127693681:-	GTCAGTCACAGGAAACGGAAACTGCAGGCATCTCCCATGA	101	1	289	1
6-qC3-6258.1	Murine-specific	2-qF1-2536.1	Murine-specific	chr6:81895736-81895766:-	ATCAGTCACAGGAAAGGAAATGGAAACTGC	chr2:127693641-127693681:-	GTCAGTCACAGGAAACGGAAACTGCAGGCATCTCCCATGA	320	1	289	1
6-qC3-6258.1	Murine-specific	2-qF1-2536.1	Murine-specific	chr6:81895737-81895766:-	ATCAGTCACAGGAAAGGAAATGGAAACTG	chr2:127693641-127693681:-	GTCAGTCACAGGAAACGGAAACTGCAGGCATCTCCCATGA	337	1	289	1
6-qC3-6258.1	Murine-specific	2-qF1-2536.1	Murine-specific	chr6:81895738-81895766:-	ATCAGTCACAGGAAAGGAAATGGAAACT	chr2:127693641-127693681:-	GTCAGTCACAGGAAACGGAAACTGCAGGCATCTCCCATGA	594	1	289	1
6-qC3-6258.1	Murine-specific	2-qF1-2536.1	Murine-specific	chr6:81895739-81895766:-	ATCAGTCACAGGAAAGGAAATGGAAAC	chr2:127693641-127693681:-	GTCAGTCACAGGAAACGGAAACTGCAGGCATCTCCCATGA	2104	1	289	1
6-qC3-6258.1	Murine-specific	2-qF1-2536.1	Murine-specific	chr6:81895740-81895766:-	ATCAGTCACAGGAAAGGAAATGGAAA	chr2:127693641-127693681:-	GTCAGTCACAGGAAACGGAAACTGCAGGCATCTCCCATGA	38	1	289	1
2-qE1-35981.1	Eutherian	10-qC1-12816.1	Murine-specific	chr2:92586771-92586797:+	TGTTTCAATAGTCTGATAACCCAAGT	chr10:75861344-75861384:-	TGTTTCAATAGTCTGTTAGCCAAAGGGAGGGGGCACAAGT	66	1	96	1
2-qE1-35981.1	Eutherian	10-qC1-12816.1	Murine-specific	chr2:92586771-92586798:+	TGTTTCAATAGTCTGATAACCCAAGTG	chr10:75861344-75861384:-	TGTTTCAATAGTCTGTTAGCCAAAGGGAGGGGGCACAAGT	77	1	96	1
2-qE1-35981.1	Eutherian	10-qC1-12816.1	Murine-specific	chr2:92586771-92586799:+	TGTTTCAATAGTCTGATAACCCAAGTGA	chr10:75861344-75861384:-	TGTTTCAATAGTCTGTTAGCCAAAGGGAGGGGGCACAAGT	74	1	96	1
2-qE1-35981.1	Eutherian	10-qC1-12816.1	Murine-specific	chr2:92586771-92586800:+	TGTTTCAATAGTCTGATAACCCAAGTGAG	chr10:75861344-75861384:-	TGTTTCAATAGTCTGTTAGCCAAAGGGAGGGGGCACAAGT	282	1	96	1
2-qE1-35981.1	Eutherian	10-qC1-12816.1	Murine-specific	chr2:92586771-92586801:+	TGTTTCAATAGTCTGATAACCCAAGTGAGT	chr10:75861344-75861384:-	TGTTTCAATAGTCTGTTAGCCAAAGGGAGGGGGCACAAGT	227	1	96	1
2-qE1-35981.1	Eutherian	10-qC1-12816.1	Murine-specific	chr2:92586771-92586801:+	TGTTTCAATAGTCTGATAACCCAAGTGAGA	chr10:75861344-75861384:-	TGTTTCAATAGTCTGTTAGCCAAAGGGAGGGGGCACAAGT	39	1	96	1
2-qE1-35981.1	Eutherian	10-qC1-12816.1	Murine-specific	chr2:92586771-92586802:+	TGTTTCAATAGTCTGATAACCCAAGTGAGTA	chr10:75861344-75861384:-	TGTTTCAATAGTCTGTTAGCCAAAGGGAGGGGGCACAAGT	302	1	96	1
2-qE1-35981.1	Eutherian	17-qE1.1-7037.1	Mouse-specific	chr2:92568020-92568049:+	AATGAATGAATGAATGAGCAGACTGTTTA	chr17:66208665-66208705:-	AATGAATGAATGAATGAATTTTTGGTGTGGAACATCTGTT	425	1	18	1
9-qC-31469.1	Murine-specific	17-qE1.1-7037.1	Mouse-specific	chr9:67728518-67728544:-	AATGAATGAATGAATGGGGGTGTCTA	chr17:66208665-66208705:-	AATGAATGAATGAATGAATTTTTGGTGTGGAACATCTGTT	31	1	18	1
9-qC-31469.1	Murine-specific	17-qE1.1-7037.1	Mouse-specific	chr9:67728519-67728544:-	AATGAATGAATGAATGGGGGTGTCT	chr17:66208665-66208705:-	AATGAATGAATGAATGAATTTTTGGTGTGGAACATCTGTT	657	1	18	1
9-qC-31469.1	Murine-specific	17-qE1.1-7037.1	Mouse-specific	chr9:67728519-67728548:-	AATGAATGAATGAATGAATGGGGGTGTCT	chr17:66208665-66208705:-	AATGAATGAATGAATGAATTTTTGGTGTGGAACATCTGTT	1105	1	18	1
9-qC-31469.1	Murine-specific	17-qE1.1-7037.1	Mouse-specific	chr9:67728520-67728544:-	AATGAATGAATGAATGGGGGTGTC	chr17:66208665-66208705:-	AATGAATGAATGAATGAATTTTTGGTGTGGAACATCTGTT	84	1	18	1
9-qC-31469.1	Murine-specific	17-qE1.1-7037.1	Mouse-specific	chr9:67728520-67728548:-	AATGAATGAATGAATGAATGGGGGTGTC	chr17:66208665-66208705:-	AATGAATGAATGAATGAATTTTTGGTGTGGAACATCTGTT	312	1	18	1
9-qC-31469.1	Murine-specific	17-qE1.1-7037.1	Mouse-specific	chr9:67728521-67728548:-	AATGAATGAATGAATGAATGGGGGTGT	chr17:66208665-66208705:-	AATGAATGAATGAATGAATTTTTGGTGTGGAACATCTGTT	72	1	18	1
9-qC-31469.1	Murine-specific	17-qE1.1-7037.1	Mouse-specific	chr9:67728522-67728548:-	AATGAATGAATGAATGAATGGGGGTG	chr17:66208665-66208705:-	AATGAATGAATGAATGAATTTTTGGTGTGGAACATCTGTT	73	1	18	1
9-qC-31469.1	Murine-specific	17-qE1.1-7037.1	Mouse-specific	chr9:67728523-67728548:-	AATGAATGAATGAATGAATGGGGGT	chr17:66208665-66208705:-	AATGAATGAATGAATGAATTTTTGGTGTGGAACATCTGTT	53	1	18	1
9-qC-31469.1	Murine-specific	17-qE1.1-7037.1	Mouse-specific	chr9:67728523-67728552:-	AATGAATGAATGAATGAATGAATGGGGGT	chr17:66208665-66208705:-	AATGAATGAATGAATGAATTTTTGGTGTGGAACATCTGTT	65	1	18	1
10-qC1-12816.1	Murine-specific	9-qA5.3-24188.1	Eutherian	chr10:75857514-75857538:+	TAGGAGAGTCTTGTTTTGGGAACC	chr9:54225800-54225840:+	CAGGAGAGTGTTGTTGAGGGAACCTTGCTAACACCAAATC	194	1	22	1
10-qC1-12816.1	Murine-specific	9-qA5.3-24188.1	Eutherian	chr10:75857514-75857539:+	TAGGAGAGTCTTGTTTTGGGAACCT	chr9:54225800-54225840:+	CAGGAGAGTGTTGTTGAGGGAACCTTGCTAACACCAAATC	91	1	22	1
10-qC1-12816.1	Murine-specific	9-qA5.3-24188.1	Eutherian	chr10:75857514-75857540:+	TAGGAGAGTCTTGTTTTGGGAACCTC	chr9:54225800-54225840:+	CAGGAGAGTGTTGTTGAGGGAACCTTGCTAACACCAAATC	228	1	22	1
9-qC-31469.1	Murine-specific	15-qE1-8387.1	Eutherian	chr9:67727323-67727350:-	TGTTTTACTCCCTCTGGCTGTGCCTCA	chr15:78656737-78656777:+	AGTTTTACTCCTTCCTGCTGCCTTGACTAACCCTGCTAGT	144	1	14	1
9-qC-31469.1	Murine-specific	15-qE1-8387.1	Eutherian	chr9:67727324-67727350:-	TGTTTTACTCCCTCTGGCTGTGCCTC	chr15:78656737-78656777:+	AGTTTTACTCCTTCCTGCTGCCTTGACTAACCCTGCTAGT	178	1	14	1
9-qC-31469.1	Murine-specific	15-qE1-8387.1	Eutherian	chr9:67727325-67727350:-	TGTTTTACTCCCTCTGGCTGTGCCT	chr15:78656737-78656777:+	AGTTTTACTCCTTCCTGCTGCCTTGACTAACCCTGCTAGT	48	1	14	1
9-qC-31469.1	Murine-specific	15-qE1-8387.1	Eutherian	chr9:67727326-67727350:-	TGTTTTACTCCCTCTGGCTGTGCC	chr15:78656737-78656777:+	AGTTTTACTCCTTCCTGCTGCCTTGACTAACCCTGCTAGT	51	1	14	1
17-qA3.3-26735.1	Eutherian	7-qD1-654.1	Murine-specific	chr17:27333028-27333052:+	TAGAATGCATGAATGAAAGGGCCC	chr7:73104577-73104617:+	AAGAATGAATGAATGAATGAATGACAAAATATGCCCTGTG	130	1	16	1
17-qA3.3-26735.1	Eutherian	7-qD1-654.1	Murine-specific	chr17:27333028-27333053:+	TAGAATGCATGAATGAAAGGGCCCT	chr7:73104577-73104617:+	AAGAATGAATGAATGAATGAATGACAAAATATGCCCTGTG	162	1	16	1
17-qA3.3-26735.1	Eutherian	7-qD1-654.1	Murine-specific	chr17:27333028-27333054:+	TAGAATGCATGAATGAAAGGGCCCTT	chr7:73104577-73104617:+	AAGAATGAATGAATGAATGAATGACAAAATATGCCCTGTG	72	1	16	1
17-qA3.3-26735.1	Eutherian	7-qD1-654.1	Murine-specific	chr17:27333028-27333056:+	TAGAATGCATGAATGAAAGGGCCCTTTT	chr7:73104577-73104617:+	AAGAATGAATGAATGAATGAATGACAAAATATGCCCTGTG	31	1	16	1
15-qD1-4001.1	Murine-specific	6-qF3-28913.1	Murine-specific	chr15:59283117-59283146:+	TACACACAGACACACAAACACATGGACCC	chr6:127797671-127797711:-	CACACACACACACACAAACACACCAATTAACTATGAATCA	64	1	13	1
18-qE1-36451.1	Eutherian	10-qB4-6488.1	Murine-specific	chr18:67064119-67064149:-	TATTATTGACCACAGCAATGACTTTGGACC	chr10:62684155-62684195:-	GATTATTGAGAACAGCCATGCTGCTTGCCTGGAGTTGGAG	32	1	26	1
15-qD1-17920.1	Eutherian	11-qE1-3997.1	Mouse-specific	chr15:59259222-59259254:-	CTCCATTTTACAGATGAGAAAATTGAAGGCCA	chr11:107995779-107995819:-	GTCCATTTTACAGACGACAAAACTGAGGCCCCAGAGAAAG	49	1	38	1
15-qD1-17920.1	Eutherian	11-qE1-3997.1	Mouse-specific	chr15:59259223-59259254:-	CTCCATTTTACAGATGAGAAAATTGAAGGCC	chr11:107995779-107995819:-	GTCCATTTTACAGACGACAAAACTGAGGCCCCAGAGAAAG	888	1	38	1
15-qD1-17920.1	Eutherian	11-qE1-3997.1	Mouse-specific	chr15:59259224-59259254:-	CTCCATTTTACAGATGAGAAAATTGAAGGC	chr11:107995779-107995819:-	GTCCATTTTACAGACGACAAAACTGAGGCCCCAGAGAAAG	311	1	38	1
15-qD1-4001.1	Eutherian	2-qE1-35981.1	Eutherian	chr15:59289704-59289731:+	TTGCTAGGTAACTGGGAGGAGTCTAGA	chr2:92560649-92560689:-	TTGCTAGGTAACTGGGAGGAGTCTAGCCTGAAGGTCAGAA	138	2	22	1
15-qD1-4001.1	Eutherian	2-qE1-35981.1	Eutherian	chr15:59289704-59289733:+	TTGCTAGGTAACTGGGAGGAGTCTAGACT	chr2:92560649-92560689:-	TTGCTAGGTAACTGGGAGGAGTCTAGCCTGAAGGTCAGAA	1181	2	22	1
17-qA3.3-26735.1	Eutherian	18-qE1-36451.1	Eutherian	chr17:27348287-27348316:+	TGAGCCAAAATAAATCTTTGCTCCTTTCT	chr18:67046297-67046337:+	TGAGCCAAAATAAATCTTTCCACCTTGTCAATTGTGTCAC	151	1	58	1
17-qA3.3-26735.1	Eutherian	18-qE1-36451.1	Eutherian	chr17:27348287-27348318:+	TGAGCCAAAATAAATCTTTGCTCCTTTCTCT	chr18:67046297-67046337:+	TGAGCCAAAATAAATCTTTCCACCTTGTCAATTGTGTCAC	43	1	58	1
7-qF3-246.1	Murine-specific	18-qE1-36451.1	Eutherian	chr7:125351873-125351902:+	TGAGCCAAAATAAGTCGTCCCTCCCTGAA	chr18:67046297-67046337:+	TGAGCCAAAATAAATCTTTCCACCTTGTCAATTGTGTCAC	48	1	58	1
7-qF3-246.1	Murine-specific	18-qE1-36451.1	Eutherian	chr7:125351873-125351903:+	TGAGCCAAAATAAGTCGTCCCTCCCTGAAT	chr18:67046297-67046337:+	TGAGCCAAAATAAATCTTTCCACCTTGTCAATTGTGTCAC	60	1	58	1
7-qF3-246.1	Murine-specific	18-qE1-36451.1	Eutherian	chr7:125351873-125351903:+	TGAGCCAAAATAAGTCGTCCCTCCCTGAAG	chr18:67046297-67046337:+	TGAGCCAAAATAAATCTTTCCACCTTGTCAATTGTGTCAC	72	1	58	1
7-qF3-246.1	Murine-specific	18-qE1-36451.1	Eutherian	chr7:125351873-125351904:+	TGAGCCAAAATAAGTCGTCCCTCCCTGAAGT	chr18:67046297-67046337:+	TGAGCCAAAATAAATCTTTCCACCTTGTCAATTGTGTCAC	39	1	58	1
15-qD1-17920.1	Eutherian	5-qG3-23659.1	Eutherian	chr15:59264795-59264826:-	TAAGCACTCAATAAATACTAGCTACTATTGT	chr5:149808214-149808254:+	TAAGCACTCAATAAATGTTCACTACTCACTGGAATCTGTT	829	1	39	1
15-qD1-17920.1	Eutherian	5-qG3-23659.1	Eutherian	chr15:59264796-59264826:-	TAAGCACTCAATAAATACTAGCTACTATTG	chr5:149808214-149808254:+	TAAGCACTCAATAAATGTTCACTACTCACTGGAATCTGTT	392	1	39	1
15-qD1-17920.1	Eutherian	5-qG3-23659.1	Eutherian	chr15:59264796-59264826:-	TAAGCACTCAATAAATACTAGCTACTATTT	chr5:149808214-149808254:+	TAAGCACTCAATAAATGTTCACTACTCACTGGAATCTGTT	57	1	39	1
15-qD1-17920.1	Eutherian	5-qG3-23659.1	Eutherian	chr15:59264797-59264826:-	TAAGCACTCAATAAATACTAGCTACTATT	chr5:149808214-149808254:+	TAAGCACTCAATAAATGTTCACTACTCACTGGAATCTGTT	147	1	39	1
15-qD1-17920.1	Eutherian	5-qG3-23659.1	Eutherian	chr15:59264798-59264826:-	TAAGCACTCAATAAATACTAGCTACTAT	chr5:149808214-149808254:+	TAAGCACTCAATAAATGTTCACTACTCACTGGAATCTGTT	165	1	39	1
15-qD1-17920.1	Eutherian	5-qG3-23659.1	Eutherian	chr15:59264800-59264826:-	TAAGCACTCAATAAATACTAGCTACT	chr5:149808214-149808254:+	TAAGCACTCAATAAATGTTCACTACTCACTGGAATCTGTT	36	1	39	1
10-qB4-6488.1	Murine-specific	7-qD2-11976.1	Eutherian	chr10:62686851-62686879:+	TCACTCTGAAGACCAGGCTGGCCTCGAC	chr7:73822594-73822634:-	TCACTCTGCAGACCAGGCTGGCCTCGAACTCAGAAATCCG	79	1	19	1
10-qB4-6488.1	Murine-specific	7-qD2-11976.1	Eutherian	chr10:62686851-62686880:+	TCACTCTGAAGACCAGGCTGGCCTCGACC	chr7:73822594-73822634:-	TCACTCTGCAGACCAGGCTGGCCTCGAACTCAGAAATCCG	114	1	19	1
10-qB4-6488.1	Murine-specific	7-qD2-11976.1	Eutherian	chr10:62686851-62686881:+	TCACTCTGAAGACCAGGCTGGCCTCGACCT	chr7:73822594-73822634:-	TCACTCTGCAGACCAGGCTGGCCTCGAACTCAGAAATCCG	277	1	19	1
15-qE1-1119.1	Mouse-specific	7-qD2-11976.1	Eutherian	chr15:79946748-79946777:+	TCACTCTGTAGACCAGGCTGGCCCTGAAA	chr7:73822594-73822634:-	TCACTCTGCAGACCAGGCTGGCCTCGAACTCAGAAATCCG	134	4	19	1
15-qE1-1119.1	Mouse-specific	7-qD2-11976.1	Eutherian	chr15:79946748-79946778:+	TCACTCTGTAGACCAGGCTGGCCCTGAAAA	chr7:73822594-73822634:-	TCACTCTGCAGACCAGGCTGGCCTCGAACTCAGAAATCCG	104	1	19	1
9-qA5.3-24188.1	Eutherian	7-qD2-11976.1	Eutherian	chr9:54222864-54222895:-	TCACTCTGTAGACCAGGCTGACCTCAACCTC	chr7:73822594-73822634:-	TCACTCTGCAGACCAGGCTGGCCTCGAACTCAGAAATCCG	572	2	19	1
9-qA5.3-24188.1	Eutherian	7-qD2-11976.1	Eutherian	chr9:54222865-54222895:-	TCACTCTGTAGACCAGGCTGACCTCAACCT	chr7:73822594-73822634:-	TCACTCTGCAGACCAGGCTGGCCTCGAACTCAGAAATCCG	1550	2	19	1
9-qA5.3-24188.1	Eutherian	7-qD2-11976.1	Eutherian	chr9:54222866-54222895:-	TCACTCTGTAGACCAGGCTGACCTCAACC	chr7:73822594-73822634:-	TCACTCTGCAGACCAGGCTGGCCTCGAACTCAGAAATCCG	2100	2	19	1
15-qE1-8387.1	Eutherian	7-qD1-19431.1	Eutherian	chr15:78664082-78664113:-	TAGGAGTCTCACAAAAACCCCAAGCCGAACT	chr7:73133722-73133762:-	CAGGAGTCCCATAAAAATCCTGAGCTAATAGCTATAATAT	126	1	16	1
15-qE1-8387.1	Eutherian	7-qD1-19431.1	Eutherian	chr15:78664083-78664113:-	TAGGAGTCTCACAAAAACCCCAAGCCGAAC	chr7:73133722-73133762:-	CAGGAGTCCCATAAAAATCCTGAGCTAATAGCTATAATAT	1362	1	16	1
15-qE1-8387.1	Eutherian	7-qD1-19431.1	Eutherian	chr15:78664083-78664113:-	TAGGAGTCTCACAAAAACCCCAAGCCGAAA	chr7:73133722-73133762:-	CAGGAGTCCCATAAAAATCCTGAGCTAATAGCTATAATAT	56	1	16	1
15-qE1-8387.1	Eutherian	7-qD1-19431.1	Eutherian	chr15:78664084-78664113:-	TAGGAGTCTCACAAAAACCCCAAGCCGAA	chr7:73133722-73133762:-	CAGGAGTCCCATAAAAATCCTGAGCTAATAGCTATAATAT	103	1	16	1
15-qE1-8387.1	Eutherian	7-qD1-19431.1	Eutherian	chr15:78664085-78664113:-	TAGGAGTCTCACAAAAACCCCAAGCCGA	chr7:73133722-73133762:-	CAGGAGTCCCATAAAAATCCTGAGCTAATAGCTATAATAT	41	1	16	1
15-qE1-8387.1	Eutherian	7-qD1-19431.1	Eutherian	chr15:78664085-78664113:-	TAGGAGTCTCACAAAAACCCCAAGCCGT	chr7:73133722-73133762:-	CAGGAGTCCCATAAAAATCCTGAGCTAATAGCTATAATAT	62	1	16	1
15-qE1-8387.1	Eutherian	7-qD1-19431.1	Eutherian	chr15:78664086-78664113:-	TAGGAGTCTCACAAAAACCCCAAGCCG	chr7:73133722-73133762:-	CAGGAGTCCCATAAAAATCCTGAGCTAATAGCTATAATAT	123	1	16	1
15-qE1-8387.1	Eutherian	7-qD1-19431.1	Eutherian	chr15:78664087-78664113:-	TAGGAGTCTCACAAAAACCCCAAGCC	chr7:73133722-73133762:-	CAGGAGTCCCATAAAAATCCTGAGCTAATAGCTATAATAT	110	1	16	1
4-qC5-17839.1	Eutherian	14-qA3-19970.1	Murine-specific	chr4:94324479-94324509:-	AGTGAAATAAGTCAGGCACAGCTAAACAAG	chr14:24102275-24102315:-	AGTGAAATAAGCCAGACACAGGAAGACAAATGTCTTCTCT	688	1	63	1
4-qC5-17839.1	Eutherian	14-qA3-19970.1	Murine-specific	chr4:94324480-94324509:-	AGTGAAATAAGTCAGGCACAGCTAAACAA	chr14:24102275-24102315:-	AGTGAAATAAGCCAGACACAGGAAGACAAATGTCTTCTCT	59	1	63	1
4-qC5-17839.1	Eutherian	14-qA3-19970.1	Murine-specific	chr4:94324481-94324509:-	AGTGAAATAAGTCAGGCACAGCTAAACT	chr14:24102275-24102315:-	AGTGAAATAAGCCAGACACAGGAAGACAAATGTCTTCTCT	39	1	63	1
4-qC5-17839.1	Eutherian	14-qA3-19970.1	Murine-specific	chr4:94324481-94324509:-	AGTGAAATAAGTCAGGCACAGCTAAACA	chr14:24102275-24102315:-	AGTGAAATAAGCCAGACACAGGAAGACAAATGTCTTCTCT	74	1	63	1
4-qC5-17839.1	Eutherian	14-qA3-19970.1	Murine-specific	chr4:94324482-94324509:-	AGTGAAATAAGTCAGGCACAGCTAAAC	chr14:24102275-24102315:-	AGTGAAATAAGCCAGACACAGGAAGACAAATGTCTTCTCT	1032	1	63	1
4-qC5-17839.1	Eutherian	14-qA3-19970.1	Murine-specific	chr4:94324483-94324509:-	AGTGAAATAAGTCAGGCACAGCTAAA	chr14:24102275-24102315:-	AGTGAAATAAGCCAGACACAGGAAGACAAATGTCTTCTCT	46	1	63	1
10-qA3-2592.1	Murine-specific	15-qD3-14639.1	Murine-specific	chr10:18797697-18797728:-	TAAACACCCAGCAGGAAAGTATAACCAAAAA	chr15:74647647-74647687:-	TAAACACCCAAAAGCAAAGTAGAGCCCAATGATTAGTATG	127	1	33	1
10-qA3-2592.1	Murine-specific	15-qD3-14639.1	Murine-specific	chr10:18797698-18797728:-	TAAACACCCAGCAGGAAAGTATAACCAAAA	chr15:74647647-74647687:-	TAAACACCCAAAAGCAAAGTAGAGCCCAATGATTAGTATG	296	1	33	1
2-qE1-35981.1	Eutherian	7-qD2-24830.1	Eutherian	chr2:92593721-92593745:+	TGATATGGGTCTTGTTTTTGTTGG	chr7:73810165-73810205:+	TGATATGGGTCTTGTATCTGGGATGGGAGTTGGATGAGAA	77	1	16	1
2-qE1-35981.1	Eutherian	7-qD2-24830.1	Eutherian	chr2:92593721-92593746:+	TGATATGGGTCTTGTTTTTGTTGGA	chr7:73810165-73810205:+	TGATATGGGTCTTGTATCTGGGATGGGAGTTGGATGAGAA	113	1	16	1
9-qA5.3-24188.1	Eutherian	9-qC-10667.1	Eutherian	chr9:54218875-54218903:-	TGATGATACGCTTTCTAAATCTTCAACT	chr9:67735438-67735478:-	AGATGATAGGCTTTCTAGTTCTGCAAGGTGGGTGGGTGAT	34	1	13	1
15-qE1-8387.1	Eutherian	9-qC-31469.1	Eutherian	chr15:78656155-78656183:-	TTGCCTGCATTTCTCTTGGAGTTCTACT	chr9:67724041-67724081:+	GTGCCTGCTTTTAGCTTTGAGGGAGGGGCCTAAGGACAAA	104	1	57	1
6-qF3-28913.1	Murine-specific	15-qD3-14639.1	Murine-specific	chr6:127800109-127800135:+	TGCTCTTGGGCTTTACCTCGTCAGGC	chr15:74640770-74640810:-	GGCTCTTGGGCTTTGCCTCTCTCCTTTCCCATGCGATGGG	133	1	13	1
6-qF3-28913.1	Murine-specific	15-qD3-14639.1	Murine-specific	chr6:127800109-127800136:+	TGCTCTTGGGCTTTACCTCGTCAGGCT	chr15:74640770-74640810:-	GGCTCTTGGGCTTTGCCTCTCTCCTTTCCCATGCGATGGG	261	1	13	1
6-qF3-28913.1	Murine-specific	15-qD3-14639.1	Murine-specific	chr6:127800109-127800139:+	TGCTCTTGGGCTTTACCTCGTCAGGCTAAC	chr15:74640770-74640810:-	GGCTCTTGGGCTTTGCCTCTCTCCTTTCCCATGCGATGGG	119	1	13	1
6-qF3-28913.1	Murine-specific	15-qD3-14639.1	Murine-specific	chr6:127800109-127800140:+	TGCTCTTGGGCTTTACCTCGTCAGGCTAACT	chr15:74640770-74640810:-	GGCTCTTGGGCTTTGCCTCTCTCCTTTCCCATGCGATGGG	431	1	13	1
10-qB4-6488.1	Murine-specific	9-qC-10667.1	Eutherian	chr10:62654708-62654737:+	TGGGATTAAATTTGTGTGCCACCATGCCT	chr9:67742059-67742099:-	TGGGATTAAAGGCGTGTGCCACCACCGCCCGGCTTGAGGA	39	1	60	1
10-qB4-6488.1	Murine-specific	9-qC-10667.1	Eutherian	chr10:62703613-62703642:+	TGGGATTAAAGGAATGGACCACCATCGCC	chr9:67742059-67742099:-	TGGGATTAAAGGCGTGTGCCACCACCGCCCGGCTTGAGGA	33	1	60	1
10-qC1-12816.1	Murine-specific	9-qC-10667.1	Eutherian	chr10:75858472-75858497:+	TGGGATTAAGGGCATGGGCCAGCCT	chr9:67742059-67742099:-	TGGGATTAAAGGCGTGTGCCACCACCGCCCGGCTTGAGGA	41	1	60	1
10-qC1-12816.1	Murine-specific	9-qC-10667.1	Eutherian	chr10:75858472-75858499:+	TGGGATTAAGGGCATGGGCCAGCCACC	chr9:67742059-67742099:-	TGGGATTAAAGGCGTGTGCCACCACCGCCCGGCTTGAGGA	297	1	60	1
10-qC1-12816.1	Murine-specific	9-qC-10667.1	Eutherian	chr10:75858472-75858500:+	TGGGATTAAGGGCATGGGCCAGCCACCA	chr9:67742059-67742099:-	TGGGATTAAAGGCGTGTGCCACCACCGCCCGGCTTGAGGA	31	1	60	1
10-qC1-12816.1	Murine-specific	9-qC-10667.1	Eutherian	chr10:75858472-75858502:+	TGGGATTAAGGGCATGGGCCAGCCACCACT	chr9:67742059-67742099:-	TGGGATTAAAGGCGTGTGCCACCACCGCCCGGCTTGAGGA	175	1	60	1
10-qC1-12816.1	Murine-specific	9-qC-10667.1	Eutherian	chr10:75858472-75858504:+	TGGGATTAAGGGCATGGGCCAGCCACCACAGC	chr9:67742059-67742099:-	TGGGATTAAAGGCGTGTGCCACCACCGCCCGGCTTGAGGA	48	1	60	1
14-qA3-19970.1	Murine-specific	9-qC-10667.1	Eutherian	chr14:24120783-24120814:+	TGGGATTAAAGGCATGTGCCACAATGCCAGG	chr9:67742059-67742099:-	TGGGATTAAAGGCGTGTGCCACCACCGCCCGGCTTGAGGA	81	1	60	1
14-qC1-1261.1	Mouse-specific	9-qC-10667.1	Eutherian	chr14:44774858-44774890:-	TGGGATTAAACGCATGAACCACCATGCATGGA	chr9:67742059-67742099:-	TGGGATTAAAGGCGTGTGCCACCACCGCCCGGCTTGAGGA	34	1	60	1
14-qC1-1261.1	Mouse-specific	9-qC-10667.1	Eutherian	chr14:44774861-44774890:-	TGGGATTAAACGCATGAACCACCATGCAT	chr9:67742059-67742099:-	TGGGATTAAAGGCGTGTGCCACCACCGCCCGGCTTGAGGA	45	1	60	1
15-qD1-4001.1	Murine-specific	9-qC-10667.1	Eutherian	chr15:59280920-59280944:+	TGGGATTAAAGGTGTGTGTGCTCC	chr9:67742059-67742099:-	TGGGATTAAAGGCGTGTGCCACCACCGCCCGGCTTGAGGA	116	1	60	1
15-qD1-4001.1	Murine-specific	9-qC-10667.1	Eutherian	chr15:59280920-59280947:+	TGGGATTAAAGGTGTGTGTGCTCCACT	chr9:67742059-67742099:-	TGGGATTAAAGGCGTGTGCCACCACCGCCCGGCTTGAGGA	57	1	60	1
15-qD1-4001.1	Murine-specific	9-qC-10667.1	Eutherian	chr15:59280920-59280947:+	TGGGATTAAAGGTGTGTGTGCTCCACC	chr9:67742059-67742099:-	TGGGATTAAAGGCGTGTGCCACCACCGCCCGGCTTGAGGA	79	1	60	1
15-qD1-4001.1	Murine-specific	9-qC-10667.1	Eutherian	chr15:59280920-59280948:+	TGGGATTAAAGGTGTGTGTGCTCCACCA	chr9:67742059-67742099:-	TGGGATTAAAGGCGTGTGCCACCACCGCCCGGCTTGAGGA	101	1	60	1
15-qD1-4001.1	Murine-specific	9-qC-10667.1	Eutherian	chr15:59280920-59280950:+	TGGGATTAAAGGTGTGTGTGCTCCACCACA	chr9:67742059-67742099:-	TGGGATTAAAGGCGTGTGCCACCACCGCCCGGCTTGAGGA	89	1	60	1
15-qD3-14639.1	Murine-specific	9-qC-10667.1	Eutherian	chr15:74649399-74649428:+	TGGGATTAAAGGTGTGTGACACAGTGCCT	chr9:67742059-67742099:-	TGGGATTAAAGGCGTGTGCCACCACCGCCCGGCTTGAGGA	147	1	60	1
2-qE1-35981.1	Eutherian	9-qC-10667.1	Eutherian	chr2:92568314-92568344:+	TGGGATTAAAGGCGTGTGCCATCACTATCC	chr9:67742059-67742099:-	TGGGATTAAAGGCGTGTGCCACCACCGCCCGGCTTGAGGA	72	1	60	1
4-qD2.2-2182.1	Murine-specific	9-qC-10667.1	Eutherian	chr4:123835196-123835225:-	TGGGATTAAAGGTGTACACCACCACGTCT	chr9:67742059-67742099:-	TGGGATTAAAGGCGTGTGCCACCACCGCCCGGCTTGAGGA	64	1	60	1
4-qD2.2-2182.1	Murine-specific	9-qC-10667.1	Eutherian	chr4:123835197-123835225:-	TGGGATTAAAGGTGTACACCACCACGTC	chr9:67742059-67742099:-	TGGGATTAAAGGCGTGTGCCACCACCGCCCGGCTTGAGGA	119	1	60	1
6-qD1-2831.1	Murine-specific	9-qC-10667.1	Eutherian	chr6:87985595-87985625:-	TGGGATTAAAGGCATGCGCAACCACGCCTG	chr9:67742059-67742099:-	TGGGATTAAAGGCGTGTGCCACCACCGCCCGGCTTGAGGA	54	1	60	1
6-qD1-2831.1	Murine-specific	9-qC-10667.1	Eutherian	chr6:87985596-87985625:-	TGGGATTAAAGGCATGCGCAACCACGCCT	chr9:67742059-67742099:-	TGGGATTAAAGGCGTGTGCCACCACCGCCCGGCTTGAGGA	34	1	60	1
9-qC-31469.1	Murine-specific	9-qC-10667.1	Eutherian	chr9:67694516-67694547:-	TGGGATTAAAGGTGTGTATCAAAAAGCCAGT	chr9:67742059-67742099:-	TGGGATTAAAGGCGTGTGCCACCACCGCCCGGCTTGAGGA	47	1	60	1
9-qC-31469.1	Murine-specific	9-qC-10667.1	Eutherian	chr9:67694516-67694547:-	TGGGATTAAAGGTGTGTATCAAAAAGCCAGC	chr9:67742059-67742099:-	TGGGATTAAAGGCGTGTGCCACCACCGCCCGGCTTGAGGA	89	1	60	1
9-qC-31469.1	Murine-specific	9-qC-10667.1	Eutherian	chr9:67694517-67694547:-	TGGGATTAAAGGTGTGTATCAAAAAGCCAG	chr9:67742059-67742099:-	TGGGATTAAAGGCGTGTGCCACCACCGCCCGGCTTGAGGA	61	1	60	1
9-qC-31469.1	Murine-specific	9-qC-10667.1	Eutherian	chr9:67694518-67694547:-	TGGGATTAAAGGTGTGTATCAAAAAGCCA	chr9:67742059-67742099:-	TGGGATTAAAGGCGTGTGCCACCACCGCCCGGCTTGAGGA	203	1	60	1
9-qC-31469.1	Murine-specific	9-qC-10667.1	Eutherian	chr9:67694519-67694547:-	TGGGATTAAAGGTGTGTATCAAAAAGCC	chr9:67742059-67742099:-	TGGGATTAAAGGCGTGTGCCACCACCGCCCGGCTTGAGGA	136	1	60	1
11-qE1-9443.1	Murine-specific	6-qF3-28913.1	Murine-specific	chr11:103441906-103441936:+	TTCCTGTTCTGATTTCCTTTGACTGTGATG	chr6:127804899-127804939:-	TTCCTGTTCTGACTTCTTTTGAGGATGAAGAGTAATATGG	69	1	13	1
5-qF-14224.1	Eutherian	6-qF3-8009.1	Eutherian	chr5:113354425-113354452:+	TGGTGATTTGAGTCGCGCCTTTCCAGC	chr6:127788664-127788704:+	GGGTGATCTGAGTCTCCCATTGCCAGTTCTCCAGGTCACC	53	1	119	1
5-qF-14224.1	Eutherian	6-qF3-8009.1	Eutherian	chr5:113354425-113354454:+	TGGTGATTTGAGTCGCGCCTTTCCAGCTG	chr6:127788664-127788704:+	GGGTGATCTGAGTCTCCCATTGCCAGTTCTCCAGGTCACC	480	1	119	1
5-qF-14224.1	Eutherian	6-qF3-8009.1	Eutherian	chr5:113354425-113354455:+	TGGTGATTTGAGTCGCGCCTTTCCAGCTGT	chr6:127788664-127788704:+	GGGTGATCTGAGTCTCCCATTGCCAGTTCTCCAGGTCACC	107	1	119	1
5-qF-14224.1	Eutherian	6-qF3-8009.1	Eutherian	chr5:113354425-113354455:+	TGGTGATTTGAGTCGCGCCTTTCCAGCTGC	chr6:127788664-127788704:+	GGGTGATCTGAGTCTCCCATTGCCAGTTCTCCAGGTCACC	144	1	119	1
5-qF-4633.1	Murine-specific	6-qF3-8009.1	Eutherian	chr5:114845648-114845678:-	TGGTGATTTGAGTCTCGCATTTCCAGCTGC	chr6:127788664-127788704:+	GGGTGATCTGAGTCTCCCATTGCCAGTTCTCCAGGTCACC	236	1	119	1
5-qF-4633.1	Murine-specific	6-qF3-8009.1	Eutherian	chr5:114845648-114845678:-	TGGTGATTTGAGTCTCGCATTTCCAGCTGT	chr6:127788664-127788704:+	GGGTGATCTGAGTCTCCCATTGCCAGTTCTCCAGGTCACC	73	1	119	1
5-qF-4633.1	Murine-specific	6-qF3-8009.1	Eutherian	chr5:114845649-114845678:-	TGGTGATTTGAGTCTCGCATTTCCAGCTT	chr6:127788664-127788704:+	GGGTGATCTGAGTCTCCCATTGCCAGTTCTCCAGGTCACC	184	1	119	1
5-qF-4633.1	Murine-specific	6-qF3-8009.1	Eutherian	chr5:114845649-114845678:-	TGGTGATTTGAGTCTCGCATTTCCAGCTG	chr6:127788664-127788704:+	GGGTGATCTGAGTCTCCCATTGCCAGTTCTCCAGGTCACC	310	1	119	1
5-qF-4633.1	Murine-specific	6-qF3-8009.1	Eutherian	chr5:114845650-114845678:-	TGGTGATTTGAGTCTCGCATTTCCAGCT	chr6:127788664-127788704:+	GGGTGATCTGAGTCTCCCATTGCCAGTTCTCCAGGTCACC	423	1	119	1
5-qF-4633.1	Murine-specific	6-qF3-8009.1	Eutherian	chr5:114845651-114845678:-	TGGTGATTTGAGTCTCGCATTTCCAGC	chr6:127788664-127788704:+	GGGTGATCTGAGTCTCCCATTGCCAGTTCTCCAGGTCACC	163	1	119	1
10-qB4-6488.1	Murine-specific	13-qA5-703.1	Mouse-specific	chr10:62687253-62687279:+	TTGTAGAGCTAAAACCCACACAGGCC	chr13:50910217-50910257:+	CTGTAGACCTAAAACCCCTTCTGCCTGCTGCCAGTCATGG	46	1	34	1
10-qB4-6488.1	Murine-specific	13-qA5-703.1	Mouse-specific	chr10:62687253-62687280:+	TTGTAGAGCTAAAACCCACACAGGCCC	chr13:50910217-50910257:+	CTGTAGACCTAAAACCCCTTCTGCCTGCTGCCAGTCATGG	673	1	34	1
10-qB4-6488.1	Murine-specific	13-qA5-703.1	Mouse-specific	chr10:62687253-62687281:+	TTGTAGAGCTAAAACCCACACAGGCCCC	chr13:50910217-50910257:+	CTGTAGACCTAAAACCCCTTCTGCCTGCTGCCAGTCATGG	409	1	34	1
18-qE1-36451.1	Eutherian	15-qD1-17920.1	Eutherian	chr18:67062641-67062672:-	ATAATAATAATAATAATAACAGCGTCAGTGT	chr15:59271040-59271080:+	TTAATAATAATAATAATAATAATAATAATAATAATAGCAA	37	1	18	1
17-qE1.1-7037.1	Mouse-specific	15-qD1-4001.1	Murine-specific	chr17:66224555-66224579:+	TGGAAGTGTAAGCCAAAGGAACCC	chr15:59288808-59288848:-	TGGAAGTGTAAGCTGAATAAACCCTTTCCTCCCCAAGTGC	40	1	51	1
17-qE1.1-7037.1	Mouse-specific	15-qD1-4001.1	Murine-specific	chr17:66224555-66224580:+	TGGAAGTGTAAGCCAAAGGAACCCT	chr15:59288808-59288848:-	TGGAAGTGTAAGCTGAATAAACCCTTTCCTCCCCAAGTGC	50	1	51	1
17-qE1.1-7037.1	Mouse-specific	15-qD1-4001.1	Murine-specific	chr17:66224555-66224581:+	TGGAAGTGTAAGCCAAAGGAACCCTT	chr15:59288808-59288848:-	TGGAAGTGTAAGCTGAATAAACCCTTTCCTCCCCAAGTGC	32	1	51	1
17-qE1.1-7037.1	Mouse-specific	15-qD1-4001.1	Murine-specific	chr17:66224555-66224583:+	TGGAAGTGTAAGCCAAAGGAACCCTTTG	chr15:59288808-59288848:-	TGGAAGTGTAAGCTGAATAAACCCTTTCCTCCCCAAGTGC	103	1	51	1
17-qE1.1-7037.1	Mouse-specific	15-qD1-4001.1	Murine-specific	chr17:66224555-66224584:+	TGGAAGTGTAAGCCAAAGGAACCCTTTGC	chr15:59288808-59288848:-	TGGAAGTGTAAGCTGAATAAACCCTTTCCTCCCCAAGTGC	468	1	51	1
17-qE1.1-7037.1	Mouse-specific	15-qD1-4001.1	Murine-specific	chr17:66224555-66224585:+	TGGAAGTGTAAGCCAAAGGAACCCTTTGCC	chr15:59288808-59288848:-	TGGAAGTGTAAGCTGAATAAACCCTTTCCTCCCCAAGTGC	895	1	51	1
17-qE1.1-7037.1	Mouse-specific	15-qD1-4001.1	Murine-specific	chr17:66224555-66224586:+	TGGAAGTGTAAGCCAAAGGAACCCTTTGCCC	chr15:59288808-59288848:-	TGGAAGTGTAAGCTGAATAAACCCTTTCCTCCCCAAGTGC	1320	1	51	1
17-qE1.1-7037.1	Mouse-specific	15-qD1-4001.1	Murine-specific	chr17:66224555-66224586:+	TGGAAGTGTAAGCCAAAGGAACCCTTTGCCT	chr15:59288808-59288848:-	TGGAAGTGTAAGCTGAATAAACCCTTTCCTCCCCAAGTGC	329	1	51	1
17-qE1.1-7037.1	Mouse-specific	15-qD1-4001.1	Murine-specific	chr17:66224555-66224587:+	TGGAAGTGTAAGCCAAAGGAACCCTTTGCCCC	chr15:59288808-59288848:-	TGGAAGTGTAAGCTGAATAAACCCTTTCCTCCCCAAGTGC	299	1	51	1
17-qE1.1-7037.1	Mouse-specific	15-qD1-4001.1	Murine-specific	chr17:66224555-66224587:+	TGGAAGTGTAAGCCAAAGGAACCCTTTGCCCT	chr15:59288808-59288848:-	TGGAAGTGTAAGCTGAATAAACCCTTTCCTCCCCAAGTGC	52	1	51	1
5-qG3-23659.1	Eutherian	9-qA5.3-24188.1	Eutherian	chr5:149814363-149814392:-	AAAAGAAGGAAACAAAACAAAGACAGACT	chr9:54240310-54240350:+	AAAAGAAGAAGAAAAAGCAAAAGAAGTCATTGGCTCAGAT	41	1	69	1
7-qD2-24830.1	Eutherian	2-qE1-35981.1	Eutherian	chr7:73815818-73815844:-	TTGACTGGGATTCATGGGGGACAGGT	chr2:92578247-92578287:-	GTGACTGGGATCCAGCAGGGAAGGGTTTGAAACAAATGCA	168	1	40	1
7-qD2-24830.1	Eutherian	2-qE1-35981.1	Eutherian	chr7:73815819-73815844:-	TTGACTGGGATTCATGGGGGACAGG	chr2:92578247-92578287:-	GTGACTGGGATCCAGCAGGGAAGGGTTTGAAACAAATGCA	127	1	40	1
15-qE1-1119.1	Mouse-specific	9-qA5.3-24188.1	Eutherian	chr15:79930244-79930271:+	TCCAAACCCAAGATGACCCAGGCTCTG	chr9:54242251-54242291:+	TCCAAACTCATGAAGACCCATGCTTCCTCCACCCAGCCAT	70	1	14	1
15-qE1-1119.1	Mouse-specific	9-qA5.3-24188.1	Eutherian	chr15:79930244-79930272:+	TCCAAACCCAAGATGACCCAGGCTCTGC	chr9:54242251-54242291:+	TCCAAACTCATGAAGACCCATGCTTCCTCCACCCAGCCAT	41	1	14	1
15-qE1-1119.1	Mouse-specific	9-qA5.3-24188.1	Eutherian	chr15:79930244-79930276:+	TCCAAACCCAAGATGACCCAGGCTCTGCCTTT	chr9:54242251-54242291:+	TCCAAACTCATGAAGACCCATGCTTCCTCCACCCAGCCAT	39	1	14	1
15-qE1-8387.1	Eutherian	12-qE-23911.1	Eutherian	chr15:78656196-78656225:-	TGTTCCAAACCTCTGAAGCCTCATGAGCC	chr12:98416702-98416742:+	TGTTCCAAATCACTGAAGTCCCAAACCAAAAGGAGATGGA	56	1	25	1
7-qD2-24830.1	Eutherian	3-qA3-2052.1	Eutherian	chr7:73813447-73813477:-	TAAACAACACTGCTGTATGAGACAGGCGAT	chr3:34874053-34874093:-	AAAACAACACAGCAGCATGAGAGAAAATAAAAGGCCTTGG	368	1	23	1
7-qD2-24830.1	Eutherian	3-qA3-2052.1	Eutherian	chr7:73813448-73813477:-	TAAACAACACTGCTGTATGAGACAGGCGA	chr3:34874053-34874093:-	AAAACAACACAGCAGCATGAGAGAAAATAAAAGGCCTTGG	291	1	23	1
7-qD2-24830.1	Eutherian	3-qA3-2052.1	Eutherian	chr7:73813448-73813477:-	TAAACAACACTGCTGTATGAGACAGGCGT	chr3:34874053-34874093:-	AAAACAACACAGCAGCATGAGAGAAAATAAAAGGCCTTGG	77	1	23	1
7-qD2-24830.1	Eutherian	3-qA3-2052.1	Eutherian	chr7:73813449-73813477:-	TAAACAACACTGCTGTATGAGACAGGCG	chr3:34874053-34874093:-	AAAACAACACAGCAGCATGAGAGAAAATAAAAGGCCTTGG	204	1	23	1
7-qD2-24830.1	Eutherian	3-qA3-2052.1	Eutherian	chr7:73813450-73813477:-	TAAACAACACTGCTGTATGAGACAGGC	chr3:34874053-34874093:-	AAAACAACACAGCAGCATGAGAGAAAATAAAAGGCCTTGG	2027	1	23	1
7-qD2-24830.1	Eutherian	3-qA3-2052.1	Eutherian	chr7:73813451-73813477:-	TAAACAACACTGCTGTATGAGACAGG	chr3:34874053-34874093:-	AAAACAACACAGCAGCATGAGAGAAAATAAAAGGCCTTGG	59	1	23	1
9-qC-31469.1	Murine-specific	15-qD1-4001.1	Murine-specific	chr9:67720495-67720525:-	TGAGTCTTTAAGTTCTCAAAGCCTGCTCCC	chr15:59287433-59287473:-	TGAGTCTTTAAACTCCCAAAGCCACCATCCATGACATACT	40	1	16	1
17-qE1.1-7037.1	Mouse-specific	10-qC1-2617.1	Murine-specific	chr17:66213636-66213664:+	TTTTTTTGTTTGTTTGTTTGATTTGACC	chr10:85750520-85750560:-	TTTTTTTGTTTGTTTGTTTTATTCAATATGAGAGGGAGGG	94	1	25	1
17-qE1.1-7037.1	Mouse-specific	10-qC1-2617.1	Murine-specific	chr17:66213636-66213665:+	TTTTTTTGTTTGTTTGTTTGATTTGACCT	chr10:85750520-85750560:-	TTTTTTTGTTTGTTTGTTTTATTCAATATGAGAGGGAGGG	449	1	25	1
17-qE1.1-7037.1	Mouse-specific	10-qC1-2617.1	Murine-specific	chr17:66213636-66213666:+	TTTTTTTGTTTGTTTGTTTGATTTGACCTG	chr10:85750520-85750560:-	TTTTTTTGTTTGTTTGTTTTATTCAATATGAGAGGGAGGG	31	1	25	1
12-qE-23911.1	Eutherian	7-qD1-16444.1	Eutherian	chr12:98401199-98401229:-	TAATGCTGGTATTAGGGACATGCATGAGCT	chr7:69920592-69920632:-	TAATGCTGGATTTAGGAACACACAAAACTGTAGACTGGAG	42	1	18	1
17-qA3.3-26735.1	Eutherian	4-qD3-2082.1	Eutherian	chr17:27334698-27334727:+	TATTTATTGAGCACCTACGATGTGCCAGG	chr4:135628959-135628999:-	CATTTATTTAGCACCTATGGTGTGCATACCCCTTGCTAGG	101	1	70	1
17-qA3.3-26735.1	Eutherian	4-qD3-2082.1	Eutherian	chr17:27334698-27334728:+	TATTTATTGAGCACCTACGATGTGCCAGGC	chr4:135628959-135628999:-	CATTTATTTAGCACCTATGGTGTGCATACCCCTTGCTAGG	1132	1	70	1
17-qA3.3-26735.1	Eutherian	4-qD3-2082.1	Eutherian	chr17:27334698-27334729:+	TATTTATTGAGCACCTACGATGTGCCAGGCA	chr4:135628959-135628999:-	CATTTATTTAGCACCTATGGTGTGCATACCCCTTGCTAGG	221	1	70	1
17-qA3.3-26735.1	Eutherian	4-qD3-2082.1	Eutherian	chr17:27334698-27334729:+	TATTTATTGAGCACCTACGATGTGCCAGGCT	chr4:135628959-135628999:-	CATTTATTTAGCACCTATGGTGTGCATACCCCTTGCTAGG	83	1	70	1
17-qA3.3-26735.1	Eutherian	4-qD3-2082.1	Eutherian	chr17:27334698-27334730:+	TATTTATTGAGCACCTACGATGTGCCAGGCAT	chr4:135628959-135628999:-	CATTTATTTAGCACCTATGGTGTGCATACCCCTTGCTAGG	40	1	70	1
17-qA3.3-26735.1	Eutherian	5-qG3-23659.1	Eutherian	chr17:27345062-27345086:+	TTTGTTGAATGGATGAATGGGTGG	chr5:149809454-149809494:+	CTTGTTGAATGAATGAAACGGGGGTGGCAAGAGACAGAGA	74	1	57	1
17-qA3.3-26735.1	Eutherian	5-qG3-23659.1	Eutherian	chr17:27345062-27345087:+	TTTGTTGAATGGATGAATGGGTGGA	chr5:149809454-149809494:+	CTTGTTGAATGAATGAAACGGGGGTGGCAAGAGACAGAGA	554	1	57	1
17-qA3.3-26735.1	Eutherian	5-qG3-23659.1	Eutherian	chr17:27345062-27345088:+	TTTGTTGAATGGATGAATGGGTGGAT	chr5:149809454-149809494:+	CTTGTTGAATGAATGAAACGGGGGTGGCAAGAGACAGAGA	332	1	57	1
17-qA3.3-26735.1	Eutherian	5-qG3-23659.1	Eutherian	chr17:27345062-27345089:+	TTTGTTGAATGGATGAATGGGTGGATT	chr5:149809454-149809494:+	CTTGTTGAATGAATGAAACGGGGGTGGCAAGAGACAGAGA	38	1	57	1
17-qA3.3-26735.1	Eutherian	5-qG3-23659.1	Eutherian	chr17:27345062-27345089:+	TTTGTTGAATGGATGAATGGGTGGATG	chr5:149809454-149809494:+	CTTGTTGAATGAATGAAACGGGGGTGGCAAGAGACAGAGA	53	1	57	1
17-qA3.3-26735.1	Eutherian	5-qG3-23659.1	Eutherian	chr17:27345062-27345090:+	TTTGTTGAATGGATGAATGGGTGGATGT	chr5:149809454-149809494:+	CTTGTTGAATGAATGAAACGGGGGTGGCAAGAGACAGAGA	80	1	57	1
17-qA3.3-26735.1	Eutherian	5-qG3-23659.1	Eutherian	chr17:27345062-27345090:+	TTTGTTGAATGGATGAATGGGTGGATGA	chr5:149809454-149809494:+	CTTGTTGAATGAATGAAACGGGGGTGGCAAGAGACAGAGA	927	1	57	1
17-qA3.3-26735.1	Eutherian	5-qG3-23659.1	Eutherian	chr17:27345062-27345091:+	TTTGTTGAATGGATGAATGGGTGGATGAT	chr5:149809454-149809494:+	CTTGTTGAATGAATGAAACGGGGGTGGCAAGAGACAGAGA	66	1	57	1
17-qA3.3-26735.1	Eutherian	5-qG3-23659.1	Eutherian	chr17:27345062-27345091:+	TTTGTTGAATGGATGAATGGGTGGATGAC	chr5:149809454-149809494:+	CTTGTTGAATGAATGAAACGGGGGTGGCAAGAGACAGAGA	944	1	57	1
17-qA3.3-26735.1	Eutherian	5-qG3-23659.1	Eutherian	chr17:27345062-27345092:+	TTTGTTGAATGGATGAATGGGTGGATGACT	chr5:149809454-149809494:+	CTTGTTGAATGAATGAAACGGGGGTGGCAAGAGACAGAGA	1132	1	57	1
11-qE1-9443.1	Murine-specific	18-qE1-36451.1	Eutherian	chr11:103434205-103434232:+	TACATGACCTTTGTTCTGAATTTTGCT	chr18:67061739-67061779:+	CACATGACCTTTGTTCTAGATATCGCTTGGGTTTTTACAG	185	1	61	1
11-qE1-9443.1	Murine-specific	18-qE1-36451.1	Eutherian	chr11:103434205-103434234:+	TACATGACCTTTGTTCTGAATTTTGCTGG	chr18:67061739-67061779:+	CACATGACCTTTGTTCTAGATATCGCTTGGGTTTTTACAG	96	1	61	1
11-qE1-9443.1	Murine-specific	18-qE1-36451.1	Eutherian	chr11:103434205-103434235:+	TACATGACCTTTGTTCTGAATTTTGCTGGA	chr18:67061739-67061779:+	CACATGACCTTTGTTCTAGATATCGCTTGGGTTTTTACAG	56	1	61	1
10-qC1-875.1	Murine-specific	2-qE1-35981.1	Eutherian	chr10:86618910-86618940:+	TTCATTCATTCACTCACTCATTCATTCTCT	chr2:92567994-92568034:-	TTCATTCATTCATTCATTCATTCGTTTGTTCGTTCTTTGA	93	1	56	1
10-qC1-875.1	Murine-specific	2-qE1-35981.1	Eutherian	chr10:86618910-86618941:+	TTCATTCATTCACTCACTCATTCATTCTCTC	chr2:92567994-92568034:-	TTCATTCATTCATTCATTCATTCGTTTGTTCGTTCTTTGA	65	1	56	1
10-qC1-875.1	Murine-specific	2-qE1-35981.1	Eutherian	chr10:86618910-86618942:+	TTCATTCATTCACTCACTCATTCATTCTCTCC	chr2:92567994-92568034:-	TTCATTCATTCATTCATTCATTCGTTTGTTCGTTCTTTGA	129	1	56	1
10-qC1-875.1	Murine-specific	2-qE1-35981.1	Eutherian	chr10:86618914-86618943:+	TTCATTCACTCACTCATTCATTCTCTCCC	chr2:92567994-92568034:-	TTCATTCATTCATTCATTCATTCGTTTGTTCGTTCTTTGA	33	1	56	1
10-qC1-875.1	Murine-specific	2-qE1-35981.1	Eutherian	chr10:86618914-86618944:+	TTCATTCACTCACTCATTCATTCTCTCCCT	chr2:92567994-92568034:-	TTCATTCATTCATTCATTCATTCGTTTGTTCGTTCTTTGA	561	1	56	1
10-qC1-875.1	Murine-specific	2-qE1-35981.1	Eutherian	chr10:86618914-86618945:+	TTCATTCACTCACTCATTCATTCTCTCCCTC	chr2:92567994-92568034:-	TTCATTCATTCATTCATTCATTCGTTTGTTCGTTCTTTGA	50	1	56	1
17-qE1.1-7037.1	Mouse-specific	2-qE1-35981.1	Eutherian	chr17:66208699-66208729:+	TTCATTCATTCATTCATCCATACATTCTCT	chr2:92567994-92568034:-	TTCATTCATTCATTCATTCATTCGTTTGTTCGTTCTTTGA	35	1	56	1
17-qE1.1-7037.1	Mouse-specific	2-qE1-35981.1	Eutherian	chr17:66208703-66208733:+	TTCATTCATTCATCCATACATTCTCTCTCT	chr2:92567994-92568034:-	TTCATTCATTCATTCATTCATTCGTTTGTTCGTTCTTTGA	295	2	56	1
17-qE1.1-7037.1	Mouse-specific	2-qE1-35981.1	Eutherian	chr17:66208703-66208734:+	TTCATTCATTCATCCATACATTCTCTCTCTC	chr2:92567994-92568034:-	TTCATTCATTCATTCATTCATTCGTTTGTTCGTTCTTTGA	91	2	56	1
17-qE1.1-7037.1	Mouse-specific	2-qE1-35981.1	Eutherian	chr17:66208703-66208735:+	TTCATTCATTCATCCATACATTCTCTCTCTCT	chr2:92567994-92568034:-	TTCATTCATTCATTCATTCATTCGTTTGTTCGTTCTTTGA	91	2	56	1
17-qE1.1-7037.1	Mouse-specific	2-qE1-35981.1	Eutherian	chr17:66208707-66208735:+	TTCATTCATCCATACATTCTCTCTCTCT	chr2:92567994-92568034:-	TTCATTCATTCATTCATTCATTCGTTTGTTCGTTCTTTGA	95	2	56	1
17-qE1.1-7037.1	Mouse-specific	2-qE1-35981.1	Eutherian	chr17:66208707-66208736:+	TTCATTCATCCATACATTCTCTCTCTCTC	chr2:92567994-92568034:-	TTCATTCATTCATTCATTCATTCGTTTGTTCGTTCTTTGA	71	2	56	1
17-qE1.1-7037.1	Mouse-specific	2-qE1-35981.1	Eutherian	chr17:66208707-66208737:+	TTCATTCATCCATACATTCTCTCTCTCTCC	chr2:92567994-92568034:-	TTCATTCATTCATTCATTCATTCGTTTGTTCGTTCTTTGA	942	1	56	1
17-qE1.1-7037.1	Mouse-specific	2-qE1-35981.1	Eutherian	chr17:66208707-66208738:+	TTCATTCATCCATACATTCTCTCTCTCTCCT	chr2:92567994-92568034:-	TTCATTCATTCATTCATTCATTCGTTTGTTCGTTCTTTGA	127	1	56	1
17-qE1.1-7037.1	Mouse-specific	2-qE1-35981.1	Eutherian	chr17:66208707-66208738:+	TTCATTCATCCATACATTCTCTCTCTCTCCC	chr2:92567994-92568034:-	TTCATTCATTCATTCATTCATTCGTTTGTTCGTTCTTTGA	81	1	56	1
17-qE1.1-7037.1	Mouse-specific	2-qE1-35981.1	Eutherian	chr17:66208707-66208739:+	TTCATTCATCCATACATTCTCTCTCTCTCCCT	chr2:92567994-92568034:-	TTCATTCATTCATTCATTCATTCGTTTGTTCGTTCTTTGA	31	1	56	1
17-qE1.1-7037.1	Mouse-specific	2-qE1-35981.1	Eutherian	chr17:66208707-66208739:+	TTCATTCATCCATACATTCTCTCTCTCTCCCC	chr2:92567994-92568034:-	TTCATTCATTCATTCATTCATTCGTTTGTTCGTTCTTTGA	41	1	56	1
7-qD1-654.1	Murine-specific	2-qE1-35981.1	Eutherian	chr7:73104560-73104590:-	TTCATTCATTCTTTCTTTCGTTCATTCGTT	chr2:92567994-92568034:-	TTCATTCATTCATTCATTCATTCGTTTGTTCGTTCTTTGA	266	1	56	1
7-qD1-654.1	Murine-specific	2-qE1-35981.1	Eutherian	chr7:73104561-73104590:-	TTCATTCATTCTTTCTTTCGTTCATTCGT	chr2:92567994-92568034:-	TTCATTCATTCATTCATTCATTCGTTTGTTCGTTCTTTGA	93	1	56	1
9-qC-31469.1	Murine-specific	6-qF3-8009.1	Eutherian	chr9:67728519-67728548:-	AATGAATGAATGAATGAATGGGGGTGTCT	chr6:127786630-127786670:+	AATGAATGAGTGAATGAATGAACACATATCAGTAACTTAG	1105	1	21	1
9-qC-31469.1	Murine-specific	6-qF3-8009.1	Eutherian	chr9:67728520-67728548:-	AATGAATGAATGAATGAATGGGGGTGTC	chr6:127786630-127786670:+	AATGAATGAGTGAATGAATGAACACATATCAGTAACTTAG	312	1	21	1
9-qC-31469.1	Murine-specific	6-qF3-8009.1	Eutherian	chr9:67728521-67728548:-	AATGAATGAATGAATGAATGGGGGTGT	chr6:127786630-127786670:+	AATGAATGAGTGAATGAATGAACACATATCAGTAACTTAG	72	1	21	1
9-qC-31469.1	Murine-specific	6-qF3-8009.1	Eutherian	chr9:67728522-67728548:-	AATGAATGAATGAATGAATGGGGGTG	chr6:127786630-127786670:+	AATGAATGAGTGAATGAATGAACACATATCAGTAACTTAG	73	1	21	1
9-qC-31469.1	Murine-specific	6-qF3-8009.1	Eutherian	chr9:67728523-67728548:-	AATGAATGAATGAATGAATGGGGGT	chr6:127786630-127786670:+	AATGAATGAGTGAATGAATGAACACATATCAGTAACTTAG	53	1	21	1
9-qC-31469.1	Murine-specific	6-qF3-8009.1	Eutherian	chr9:67728523-67728552:-	AATGAATGAATGAATGAATGAATGGGGGT	chr6:127786630-127786670:+	AATGAATGAGTGAATGAATGAACACATATCAGTAACTTAG	65	1	21	1
10-qB4-6488.1	Murine-specific	15-qD1-17920.1	Eutherian	chr10:62703613-62703642:+	TGGGATTAAAGGAATGGACCACCATCGCC	chr15:59249946-59249986:+	TGGGATTACAAGCATGCACCACTACACCCTAGACCCGTAC	33	1	17	1
14-qA3-3095.1	Mouse-specific	15-qD1-17920.1	Eutherian	chr14:19638143-19638174:-	TGGGATTAAAAACATGAACCACCATGGATGT	chr15:59249946-59249986:+	TGGGATTACAAGCATGCACCACTACACCCTAGACCCGTAC	90	1	17	1
14-qA3-3095.1	Mouse-specific	15-qD1-17920.1	Eutherian	chr14:19638144-19638174:-	TGGGATTAAAAACATGAACCACCATGGATG	chr15:59249946-59249986:+	TGGGATTACAAGCATGCACCACTACACCCTAGACCCGTAC	138	1	17	1
14-qA3-3095.1	Mouse-specific	15-qD1-17920.1	Eutherian	chr14:19638145-19638174:-	TGGGATTAAAAACATGAACCACCATGGAT	chr15:59249946-59249986:+	TGGGATTACAAGCATGCACCACTACACCCTAGACCCGTAC	335	1	17	1
14-qA3-3095.1	Mouse-specific	15-qD1-17920.1	Eutherian	chr14:19638146-19638174:-	TGGGATTAAAAACATGAACCACCATGGA	chr15:59249946-59249986:+	TGGGATTACAAGCATGCACCACTACACCCTAGACCCGTAC	42	1	17	1
14-qA3-3095.1	Mouse-specific	15-qD1-17920.1	Eutherian	chr14:19638147-19638174:-	TGGGATTAAAAACATGAACCACCATGG	chr15:59249946-59249986:+	TGGGATTACAAGCATGCACCACTACACCCTAGACCCGTAC	45	1	17	1
14-qA3-3095.1	Mouse-specific	15-qD1-17920.1	Eutherian	chr14:19638150-19638174:-	TGGGATTAAAAACATGAACCACCA	chr15:59249946-59249986:+	TGGGATTACAAGCATGCACCACTACACCCTAGACCCGTAC	88	1	17	1
14-qA3-19970.1	Murine-specific	15-qD1-17920.1	Eutherian	chr14:24120783-24120814:+	TGGGATTAAAGGCATGTGCCACAATGCCAGG	chr15:59249946-59249986:+	TGGGATTACAAGCATGCACCACTACACCCTAGACCCGTAC	81	1	17	1
14-qC1-1261.1	Mouse-specific	15-qD1-17920.1	Eutherian	chr14:44774858-44774890:-	TGGGATTAAACGCATGAACCACCATGCATGGA	chr15:59249946-59249986:+	TGGGATTACAAGCATGCACCACTACACCCTAGACCCGTAC	34	1	17	1
14-qC1-1261.1	Mouse-specific	15-qD1-17920.1	Eutherian	chr14:44774861-44774890:-	TGGGATTAAACGCATGAACCACCATGCAT	chr15:59249946-59249986:+	TGGGATTACAAGCATGCACCACTACACCCTAGACCCGTAC	45	1	17	1
6-qC3-6258.1	Murine-specific	15-qD1-17920.1	Eutherian	chr6:81898600-81898631:-	TGGGATTACAGGTGTGCACAACTTTCCTGCT	chr15:59249946-59249986:+	TGGGATTACAAGCATGCACCACTACACCCTAGACCCGTAC	126	1	17	1
6-qC3-6258.1	Murine-specific	15-qD1-17920.1	Eutherian	chr6:81898601-81898631:-	TGGGATTACAGGTGTGCACAACTTTCCTGC	chr15:59249946-59249986:+	TGGGATTACAAGCATGCACCACTACACCCTAGACCCGTAC	36	1	17	1
6-qC3-6258.1	Murine-specific	15-qD1-17920.1	Eutherian	chr6:81898603-81898631:-	TGGGATTACAGGTGTGCACAACTTTCCT	chr15:59249946-59249986:+	TGGGATTACAAGCATGCACCACTACACCCTAGACCCGTAC	108	1	17	1
6-qC3-6258.1	Murine-specific	15-qD1-17920.1	Eutherian	chr6:81898606-81898631:-	TGGGATTACAGGTGTGCACAACTTT	chr15:59249946-59249986:+	TGGGATTACAAGCATGCACCACTACACCCTAGACCCGTAC	46	1	17	1
6-qD1-2831.1	Murine-specific	15-qD1-17920.1	Eutherian	chr6:87985595-87985625:-	TGGGATTAAAGGCATGCGCAACCACGCCTG	chr15:59249946-59249986:+	TGGGATTACAAGCATGCACCACTACACCCTAGACCCGTAC	54	1	17	1
6-qD1-2831.1	Murine-specific	15-qD1-17920.1	Eutherian	chr6:87985596-87985625:-	TGGGATTAAAGGCATGCGCAACCACGCCT	chr15:59249946-59249986:+	TGGGATTACAAGCATGCACCACTACACCCTAGACCCGTAC	34	1	17	1
2-qE1-35981.1	Eutherian	6-qF3-28913.1	Murine-specific	chr2:92550202-92550229:+	TCATCCTTCAAAACCCAGCTCACGTGC	chr6:127813633-127813673:-	TCATCCTTCAAGACTCAGCTTTGGTGTCACATTGGGCCCT	32	1	33	1
2-qE1-35981.1	Eutherian	6-qF3-28913.1	Murine-specific	chr2:92550202-92550231:+	TCATCCTTCAAAACCCAGCTCACGTGCCT	chr6:127813633-127813673:-	TCATCCTTCAAGACTCAGCTTTGGTGTCACATTGGGCCCT	101	1	33	1
2-qE1-35981.1	Eutherian	6-qF3-28913.1	Murine-specific	chr2:92550202-92550232:+	TCATCCTTCAAAACCCAGCTCACGTGCCTC	chr6:127813633-127813673:-	TCATCCTTCAAGACTCAGCTTTGGTGTCACATTGGGCCCT	85	1	33	1
6-qF3-28913.1	Murine-specific	12-qE-23911.1	Eutherian	chr6:127826084-127826115:+	TTCTTTCTGTCTTTCTATCCTACCTTATCGT	chr12:98388853-98388893:+	TTCTTTCTTTCTTTCTTTCTTTCTTTCTTTCTTTCTTTCT	39	1	20	1
4-qB3-3994.1	Murine-specific	4-qC5-17839.1	Eutherian	chr4:57360592-57360621:-	TCCTTTTCTGGGCTGCTTTTGCCACAGCT	chr4:94282817-94282857:+	TCCTTTTCTGGGTTCCTTTCACCAGTCAGGGTTAATTCCT	35	1	28	1
17-qE1.1-7037.1	Mouse-specific	12-qE-7089.1	Eutherian	chr17:66213640-66213671:+	TTTGTTTGTTTGTTTGATTTGACCTGTCACC	chr12:98446154-98446194:-	TTTGTTTGTTTGTTTGTTTGTTTTTTGTTTTTGTTTTTTG	71	1	33	1
17-qE1.1-7037.1	Mouse-specific	17-qE1.1-7037.1	Mouse-specific	chr17:66211895-66211920:+	AACACATGGACTAGAAATTAAACCA	chr17:66211411-66211451:-	AACACATGGACTAGAAATTAAACGCCTGCTTAGATGCAGA	46	1	158	1
17-qE1.1-7037.1	Mouse-specific	17-qE1.1-7037.1	Mouse-specific	chr17:66211895-66211921:+	AACACATGGACTAGAAATTAAACCAA	chr17:66211411-66211451:-	AACACATGGACTAGAAATTAAACGCCTGCTTAGATGCAGA	77	1	158	1
17-qE1.1-7037.1	Mouse-specific	17-qE1.1-7037.1	Mouse-specific	chr17:66211895-66211922:+	AACACATGGACTAGAAATTAAACCAAA	chr17:66211411-66211451:-	AACACATGGACTAGAAATTAAACGCCTGCTTAGATGCAGA	128	1	158	1
17-qE1.1-7037.1	Mouse-specific	17-qE1.1-7037.1	Mouse-specific	chr17:66211895-66211923:+	AACACATGGACTAGAAATTAAACCAAAG	chr17:66211411-66211451:-	AACACATGGACTAGAAATTAAACGCCTGCTTAGATGCAGA	936	1	158	1
17-qE1.1-7037.1	Mouse-specific	17-qE1.1-7037.1	Mouse-specific	chr17:66211895-66211924:+	AACACATGGACTAGAAATTAAACCAAAGT	chr17:66211411-66211451:-	AACACATGGACTAGAAATTAAACGCCTGCTTAGATGCAGA	3507	1	158	1
17-qE1.1-7037.1	Mouse-specific	17-qE1.1-7037.1	Mouse-specific	chr17:66211895-66211925:+	AACACATGGACTAGAAATTAAACCAAAGTA	chr17:66211411-66211451:-	AACACATGGACTAGAAATTAAACGCCTGCTTAGATGCAGA	837	1	158	1
17-qE1.1-7037.1	Mouse-specific	17-qE1.1-7037.1	Mouse-specific	chr17:66211895-66211926:+	AACACATGGACTAGAAATTAAACCAAAGTAG	chr17:66211411-66211451:-	AACACATGGACTAGAAATTAAACGCCTGCTTAGATGCAGA	352	1	158	1
17-qE1.1-7037.1	Mouse-specific	17-qE1.1-7037.1	Mouse-specific	chr17:66211895-66211927:+	AACACATGGACTAGAAATTAAACCAAAGTAGG	chr17:66211411-66211451:-	AACACATGGACTAGAAATTAAACGCCTGCTTAGATGCAGA	280	1	158	1
17-qE1.1-7037.1	Mouse-specific	17-qE1.1-7037.1	Mouse-specific	chr17:66211895-66211927:+	AACACATGGACTAGAAATTAAACCAAAGTAGT	chr17:66211411-66211451:-	AACACATGGACTAGAAATTAAACGCCTGCTTAGATGCAGA	62	1	158	1
6-qF3-28913.1	Murine-specific	15-qD3-14639.1	Murine-specific	chr6:127812269-127812299:+	TCAGTGGTTAAGAGTGCTTGCTGCTCTTAC	chr15:74648626-74648666:-	TCAGTGGTTAAGAGCACAGGCTGCTCTACCAGAGGACCCA	93	3	75	1
9-qA5.3-1495.1	Murine-specific	15-qD3-14639.1	Murine-specific	chr9:54251323-54251353:+	TCAGTGGTTAAGAGCATTTGCTAATCTGTA	chr15:74648626-74648666:-	TCAGTGGTTAAGAGCACAGGCTGCTCTACCAGAGGACCCA	56	1	75	1
17-qE1.1-7037.1	Mouse-specific	9-qA1-178.1	Murine-specific	chr17:66215677-66215704:+	CTTTGAGTCATTTCTGTTCCTGTGATC	chr9:3185801-3185841:+	CTTTGAGTCATTTCTGCTCCTGTAAGTAACCCCTCACCCA	32	1	54	1
17-qE1.1-7037.1	Mouse-specific	9-qA1-178.1	Murine-specific	chr17:66215677-66215706:+	CTTTGAGTCATTTCTGTTCCTGTGATCCA	chr9:3185801-3185841:+	CTTTGAGTCATTTCTGCTCCTGTAAGTAACCCCTCACCCA	39	1	54	1
17-qE1.1-7037.1	Mouse-specific	9-qA1-178.1	Murine-specific	chr17:66215677-66215707:+	CTTTGAGTCATTTCTGTTCCTGTGATCCAC	chr9:3185801-3185841:+	CTTTGAGTCATTTCTGCTCCTGTAAGTAACCCCTCACCCA	65	1	54	1
17-qE1.1-7037.1	Mouse-specific	9-qA1-178.1	Murine-specific	chr17:66215677-66215708:+	CTTTGAGTCATTTCTGTTCCTGTGATCCACC	chr9:3185801-3185841:+	CTTTGAGTCATTTCTGCTCCTGTAAGTAACCCCTCACCCA	76	1	54	1
7-qD2-11976.1	Eutherian	15-qE1-8387.1	Eutherian	chr7:73821484-73821510:+	CAGAAGTCCAAAATCAAGGTACTGGC	chr15:78662733-78662773:+	GAGAAGTCAGAAATCAAGCTAACAACCTGTTATAGCCACT	69	1	14	1
5-qF-14224.1	Eutherian	4-qB3-639.1	Mouse-specific	chr5:113355276-113355301:+	CATGAAGGAAAAGGGCTGCACATGT	chr4:62220821-62220861:+	AATGAAGGAAAGAGACTACACTGCATGAACCCAGATAGGC	73	2	23	1
5-qF-14224.1	Eutherian	4-qB3-639.1	Mouse-specific	chr5:113355276-113355305:+	CATGAAGGAAAAGGGCTGCACATGTGACT	chr4:62220821-62220861:+	AATGAAGGAAAGAGACTACACTGCATGAACCCAGATAGGC	97	2	23	1
5-qF-4633.1	Murine-specific	4-qB3-639.1	Mouse-specific	chr5:114844787-114844816:-	CATGAAGGAAAAGGGCTGCACATGTGACT	chr4:62220821-62220861:+	AATGAAGGAAAGAGACTACACTGCATGAACCCAGATAGGC	97	2	23	1
5-qF-4633.1	Murine-specific	4-qB3-639.1	Mouse-specific	chr5:114844791-114844816:-	CATGAAGGAAAAGGGCTGCACATGT	chr4:62220821-62220861:+	AATGAAGGAAAGAGACTACACTGCATGAACCCAGATAGGC	73	2	23	1
9-qC-31469.1	Murine-specific	7-qD1-16444.1	Eutherian	chr9:67698088-67698115:-	TGCTTTTGAGTTGGCTTGCTTCCCCCT	chr7:69915756-69915796:-	TGCTTTTGAGTTGGTTTTCTTCTTTTCTGTCTTCAGTTCA	35	1	41	1
15-qE1-8387.1	Eutherian	10-qB4-6488.1	Murine-specific	chr15:78666405-78666437:-	TCAGTTGGTAGAGTGCTTGCCTAGCACGAATT	chr10:62676461-62676501:-	TCAGTTGGTAGAATGATTGCTTAGCAGGCATGAGTTCTTG	86	1	72	1
15-qE1-8387.1	Eutherian	10-qB4-6488.1	Murine-specific	chr15:78666406-78666437:-	TCAGTTGGTAGAGTGCTTGCCTAGCACGAAT	chr10:62676461-62676501:-	TCAGTTGGTAGAATGATTGCTTAGCAGGCATGAGTTCTTG	265	1	72	1
15-qE1-8387.1	Eutherian	10-qB4-6488.1	Murine-specific	chr15:78666406-78666437:-	TCAGTTGGTAGAGTGCTTGCCTAGCACGATT	chr10:62676461-62676501:-	TCAGTTGGTAGAATGATTGCTTAGCAGGCATGAGTTCTTG	49	1	72	1
15-qE1-8387.1	Eutherian	10-qB4-6488.1	Murine-specific	chr15:78666407-78666437:-	TCAGTTGGTAGAGTGCTTGCCTAGCACGAA	chr10:62676461-62676501:-	TCAGTTGGTAGAATGATTGCTTAGCAGGCATGAGTTCTTG	314	1	72	1
15-qE1-8387.1	Eutherian	10-qB4-6488.1	Murine-specific	chr15:78666408-78666437:-	TCAGTTGGTAGAGTGCTTGCCTAGCACGA	chr10:62676461-62676501:-	TCAGTTGGTAGAATGATTGCTTAGCAGGCATGAGTTCTTG	287	1	72	1
15-qE1-8387.1	Eutherian	10-qB4-6488.1	Murine-specific	chr15:78666409-78666437:-	TCAGTTGGTAGAGTGCTTGCCTAGCACG	chr10:62676461-62676501:-	TCAGTTGGTAGAATGATTGCTTAGCAGGCATGAGTTCTTG	192	4	72	1
9-qC-10667.1	Eutherian	5-qF-4633.1	Murine-specific	chr9:67750125-67750154:+	TGAAACTCTACCCCATGTTAGCTCTCATG	chr5:114835865-114835905:+	TGAAACTCTTCCCCACGTTAGCTCTCAGGAGCACAGCTTT	68	2	113	1
9-qC-10667.1	Eutherian	5-qF-4633.1	Murine-specific	chr9:67750125-67750155:+	TGAAACTCTACCCCATGTTAGCTCTCATGA	chr5:114835865-114835905:+	TGAAACTCTTCCCCACGTTAGCTCTCAGGAGCACAGCTTT	240	2	113	1
10-qB4-6488.1	Murine-specific	6-qC3-2394.1	Murine-specific	chr10:62676286-62676316:+	TTTAATCCCAGTTCTCGGGAGTTTGAGAGC	chr6:85986635-85986675:+	TTTAATCCCAGCACTCGGGAGGCAGAGGCAGGCGAATTTC	40	1	33	1
10-qB4-6488.1	Murine-specific	6-qC3-2394.1	Murine-specific	chr10:62688647-62688673:+	TTTAATCTTAGCACTGGGGAGACTGA	chr6:85986635-85986675:+	TTTAATCCCAGCACTCGGGAGGCAGAGGCAGGCGAATTTC	42	1	33	1
10-qB4-6488.1	Murine-specific	6-qC3-2394.1	Murine-specific	chr10:62688647-62688675:+	TTTAATCTTAGCACTGGGGAGACTGAGT	chr6:85986635-85986675:+	TTTAATCCCAGCACTCGGGAGGCAGAGGCAGGCGAATTTC	47	1	33	1
10-qB4-6488.1	Murine-specific	6-qC3-2394.1	Murine-specific	chr10:62688647-62688675:+	TTTAATCTTAGCACTGGGGAGACTGAGA	chr6:85986635-85986675:+	TTTAATCCCAGCACTCGGGAGGCAGAGGCAGGCGAATTTC	75	1	33	1
10-qB4-6488.1	Murine-specific	6-qC3-2394.1	Murine-specific	chr10:62688647-62688676:+	TTTAATCTTAGCACTGGGGAGACTGAGAT	chr6:85986635-85986675:+	TTTAATCCCAGCACTCGGGAGGCAGAGGCAGGCGAATTTC	181	1	33	1
11-qE1-9443.1	Murine-specific	6-qC3-2394.1	Murine-specific	chr11:103447005-103447031:+	TTTAATCCCAGGACCCGGAAAGCAAA	chr6:85986635-85986675:+	TTTAATCCCAGCACTCGGGAGGCAGAGGCAGGCGAATTTC	55	1	33	1
11-qE1-9443.1	Murine-specific	6-qC3-2394.1	Murine-specific	chr11:103447005-103447032:+	TTTAATCCCAGGACCCGGAAAGCAAAG	chr6:85986635-85986675:+	TTTAATCCCAGCACTCGGGAGGCAGAGGCAGGCGAATTTC	72	1	33	1
11-qE1-9443.1	Murine-specific	6-qC3-2394.1	Murine-specific	chr11:103447005-103447033:+	TTTAATCCCAGGACCCGGAAAGCAAAGG	chr6:85986635-85986675:+	TTTAATCCCAGCACTCGGGAGGCAGAGGCAGGCGAATTTC	61	1	33	1
11-qE1-9443.1	Murine-specific	6-qC3-2394.1	Murine-specific	chr11:103447005-103447033:+	TTTAATCCCAGGACCCGGAAAGCAAAGT	chr6:85986635-85986675:+	TTTAATCCCAGCACTCGGGAGGCAGAGGCAGGCGAATTTC	63	1	33	1
11-qE1-9443.1	Murine-specific	6-qC3-2394.1	Murine-specific	chr11:103447005-103447034:+	TTTAATCCCAGGACCCGGAAAGCAAAGGC	chr6:85986635-85986675:+	TTTAATCCCAGCACTCGGGAGGCAGAGGCAGGCGAATTTC	348	1	33	1
11-qE1-9443.1	Murine-specific	6-qC3-2394.1	Murine-specific	chr11:103447005-103447035:+	TTTAATCCCAGGACCCGGAAAGCAAAGGCA	chr6:85986635-85986675:+	TTTAATCCCAGCACTCGGGAGGCAGAGGCAGGCGAATTTC	192	1	33	1
11-qE1-9443.1	Murine-specific	6-qC3-2394.1	Murine-specific	chr11:103447005-103447036:+	TTTAATCCCAGGACCCGGAAAGCAAAGGCAG	chr6:85986635-85986675:+	TTTAATCCCAGCACTCGGGAGGCAGAGGCAGGCGAATTTC	53	1	33	1
11-qE1-9443.1	Murine-specific	6-qC3-2394.1	Murine-specific	chr11:103447005-103447037:+	TTTAATCCCAGGACCCGGAAAGCAAAGGCAGT	chr6:85986635-85986675:+	TTTAATCCCAGCACTCGGGAGGCAGAGGCAGGCGAATTTC	33	1	33	1
15-qD3-14639.1	Murine-specific	6-qC3-2394.1	Murine-specific	chr15:74657262-74657288:+	TTTAATCACAGCACTAGGGAAACAGA	chr6:85986635-85986675:+	TTTAATCCCAGCACTCGGGAGGCAGAGGCAGGCGAATTTC	65	2	33	1
15-qD3-14639.1	Murine-specific	6-qC3-2394.1	Murine-specific	chr15:74657262-74657289:+	TTTAATCACAGCACTAGGGAAACAGAA	chr6:85986635-85986675:+	TTTAATCCCAGCACTCGGGAGGCAGAGGCAGGCGAATTTC	149	1	33	1
15-qD3-14639.1	Murine-specific	6-qC3-2394.1	Murine-specific	chr15:74657262-74657290:+	TTTAATCACAGCACTAGGGAAACAGAAG	chr6:85986635-85986675:+	TTTAATCCCAGCACTCGGGAGGCAGAGGCAGGCGAATTTC	378	1	33	1
15-qD3-14639.1	Murine-specific	6-qC3-2394.1	Murine-specific	chr15:74657262-74657291:+	TTTAATCACAGCACTAGGGAAACAGAAGC	chr6:85986635-85986675:+	TTTAATCCCAGCACTCGGGAGGCAGAGGCAGGCGAATTTC	1836	1	33	1
15-qD3-14639.1	Murine-specific	6-qC3-2394.1	Murine-specific	chr15:74657262-74657291:+	TTTAATCACAGCACTAGGGAAACAGAAGT	chr6:85986635-85986675:+	TTTAATCCCAGCACTCGGGAGGCAGAGGCAGGCGAATTTC	81	1	33	1
15-qD3-14639.1	Murine-specific	6-qC3-2394.1	Murine-specific	chr15:74657262-74657292:+	TTTAATCACAGCACTAGGGAAACAGAAGCT	chr6:85986635-85986675:+	TTTAATCCCAGCACTCGGGAGGCAGAGGCAGGCGAATTTC	1523	1	33	1
15-qD3-14639.1	Murine-specific	6-qC3-2394.1	Murine-specific	chr15:74657262-74657293:+	TTTAATCACAGCACTAGGGAAACAGAAGCTT	chr6:85986635-85986675:+	TTTAATCCCAGCACTCGGGAGGCAGAGGCAGGCGAATTTC	195	1	33	1
17-qA3.3-27363.1	Eutherian	6-qC3-2394.1	Murine-specific	chr17:27297330-27297360:-	TTTAATCCCAGCACTCACGCAGAAAAGGCA	chr6:85986635-85986675:+	TTTAATCCCAGCACTCGGGAGGCAGAGGCAGGCGAATTTC	34	1	33	1
5-qF-14224.1	Eutherian	6-qC3-2394.1	Murine-specific	chr5:113343582-113343610:+	TTTAATCCCAGCTCTTGGGAGGCGGAGG	chr6:85986635-85986675:+	TTTAATCCCAGCACTCGGGAGGCAGAGGCAGGCGAATTTC	253	4	33	1
5-qF-14224.1	Eutherian	6-qC3-2394.1	Murine-specific	chr5:113343582-113343611:+	TTTAATCCCAGCTCTTGGGAGGCGGAGGC	chr6:85986635-85986675:+	TTTAATCCCAGCACTCGGGAGGCAGAGGCAGGCGAATTTC	174	4	33	1
9-qA5.3-1495.1	Murine-specific	6-qC3-2394.1	Murine-specific	chr9:54249982-54250008:+	TTTAATCTCAGCACCGTGGAGGCAGA	chr6:85986635-85986675:+	TTTAATCCCAGCACTCGGGAGGCAGAGGCAGGCGAATTTC	47	1	33	1
9-qA5.3-1495.1	Murine-specific	6-qC3-2394.1	Murine-specific	chr9:54249982-54250011:+	TTTAATCTCAGCACCGTGGAGGCAGAGGC	chr6:85986635-85986675:+	TTTAATCCCAGCACTCGGGAGGCAGAGGCAGGCGAATTTC	60	1	33	1
9-qA5.3-1495.1	Murine-specific	6-qC3-2394.1	Murine-specific	chr9:54249982-54250012:+	TTTAATCTCAGCACCGTGGAGGCAGAGGCT	chr6:85986635-85986675:+	TTTAATCCCAGCACTCGGGAGGCAGAGGCAGGCGAATTTC	41	1	33	1
6-qD1-2831.1	Murine-specific	18-qE1-36451.1	Eutherian	chr6:87991022-87991051:-	TAATGACAGGATCCCAGAAAGTGGTGGGC	chr18:67042734-67042774:+	AAATGACAGAATTCCAGAAGAGTGGTTTCTAGGGCTTGGG	89	1	23	1
6-qD1-2831.1	Murine-specific	18-qE1-36451.1	Eutherian	chr6:87991027-87991051:-	TAATGACAGGATCCCAGAAAGTGG	chr18:67042734-67042774:+	AAATGACAGAATTCCAGAAGAGTGGTTTCTAGGGCTTGGG	115	1	23	1
7-qD1-16444.1	Eutherian	7-qD1-9417.1	Murine-specific	chr7:69913492-69913516:+	AGCTTCTTGGACCCCTCACCTTCT	chr7:69904847-69904887:+	TGCTTCTTGGACCTCTGGCCTTGGAGACTAAGAACCCAGA	232	1	125	1
7-qD1-16444.1	Eutherian	7-qD1-9417.1	Murine-specific	chr7:69913492-69913517:+	AGCTTCTTGGACCCCTCACCTTCTG	chr7:69904847-69904887:+	TGCTTCTTGGACCTCTGGCCTTGGAGACTAAGAACCCAGA	304	1	125	1
7-qD1-16444.1	Eutherian	7-qD1-9417.1	Murine-specific	chr7:69913492-69913518:+	AGCTTCTTGGACCCCTCACCTTCTGT	chr7:69904847-69904887:+	TGCTTCTTGGACCTCTGGCCTTGGAGACTAAGAACCCAGA	141	1	125	1
7-qD1-16444.1	Eutherian	7-qD1-9417.1	Murine-specific	chr7:69913492-69913518:+	AGCTTCTTGGACCCCTCACCTTCTGG	chr7:69904847-69904887:+	TGCTTCTTGGACCTCTGGCCTTGGAGACTAAGAACCCAGA	381	1	125	1
7-qD1-16444.1	Eutherian	7-qD1-9417.1	Murine-specific	chr7:69913492-69913518:+	AGCTTCTTGGACCCCTCACCTTCTGA	chr7:69904847-69904887:+	TGCTTCTTGGACCTCTGGCCTTGGAGACTAAGAACCCAGA	72	1	125	1
7-qD1-16444.1	Eutherian	7-qD1-9417.1	Murine-specific	chr7:69913492-69913519:+	AGCTTCTTGGACCCCTCACCTTCTGGA	chr7:69904847-69904887:+	TGCTTCTTGGACCTCTGGCCTTGGAGACTAAGAACCCAGA	481	1	125	1
7-qD1-16444.1	Eutherian	7-qD1-9417.1	Murine-specific	chr7:69913492-69913519:+	AGCTTCTTGGACCCCTCACCTTCTGGT	chr7:69904847-69904887:+	TGCTTCTTGGACCTCTGGCCTTGGAGACTAAGAACCCAGA	82	1	125	1
7-qD1-16444.1	Eutherian	7-qD1-9417.1	Murine-specific	chr7:69913492-69913520:+	AGCTTCTTGGACCCCTCACCTTCTGGAA	chr7:69904847-69904887:+	TGCTTCTTGGACCTCTGGCCTTGGAGACTAAGAACCCAGA	237	1	125	1
7-qD1-16444.1	Eutherian	7-qD1-9417.1	Murine-specific	chr7:69913492-69913520:+	AGCTTCTTGGACCCCTCACCTTCTGGAT	chr7:69904847-69904887:+	TGCTTCTTGGACCTCTGGCCTTGGAGACTAAGAACCCAGA	73	1	125	1
7-qD1-16444.1	Eutherian	7-qD1-9417.1	Murine-specific	chr7:69913492-69913521:+	AGCTTCTTGGACCCCTCACCTTCTGGAAG	chr7:69904847-69904887:+	TGCTTCTTGGACCTCTGGCCTTGGAGACTAAGAACCCAGA	34	1	125	1
7-qD1-16444.1	Eutherian	7-qD1-9417.1	Murine-specific	chr7:69913492-69913521:+	AGCTTCTTGGACCCCTCACCTTCTGGAAA	chr7:69904847-69904887:+	TGCTTCTTGGACCTCTGGCCTTGGAGACTAAGAACCCAGA	36	1	125	1
7-qD1-16444.1	Eutherian	7-qD1-9417.1	Murine-specific	chr7:69913492-69913522:+	AGCTTCTTGGACCCCTCACCTTCTGGAAGA	chr7:69904847-69904887:+	TGCTTCTTGGACCTCTGGCCTTGGAGACTAAGAACCCAGA	330	1	125	1
7-qD1-16444.1	Eutherian	7-qD1-9417.1	Murine-specific	chr7:69913492-69913522:+	AGCTTCTTGGACCCCTCACCTTCTGGAAGT	chr7:69904847-69904887:+	TGCTTCTTGGACCTCTGGCCTTGGAGACTAAGAACCCAGA	75	1	125	1
7-qD1-16444.1	Eutherian	7-qD1-9417.1	Murine-specific	chr7:69913492-69913523:+	AGCTTCTTGGACCCCTCACCTTCTGGAAGAT	chr7:69904847-69904887:+	TGCTTCTTGGACCTCTGGCCTTGGAGACTAAGAACCCAGA	121	1	125	1
7-qD1-16444.1	Eutherian	7-qD1-9417.1	Murine-specific	chr7:69913492-69913524:+	AGCTTCTTGGACCCCTCACCTTCTGGAAGATT	chr7:69904847-69904887:+	TGCTTCTTGGACCTCTGGCCTTGGAGACTAAGAACCCAGA	59	1	125	1
15-qD1-4001.1	Murine-specific	9-qC-31469.1	Murine-specific	chr15:59290060-59290089:+	TGCCAATCCAACAGAGAGAATGAGTGACC	chr9:67695519-67695559:+	GGCCAATCCAAAAGAGGCAATTCCTCAACTGAGGGCCTCT	43	1	13	1
10-qB4-6488.1	Murine-specific	9-qA5.3-24188.1	Eutherian	chr10:62661908-62661933:+	TACAGAGTGAGTTCCAGAACAGACT	chr9:54222885-54222925:+	TACAGAGTGAGTTCGAGGCCAGCCATGGGCTACATGGTGA	55	1	97	1
10-qB4-6488.1	Murine-specific	9-qA5.3-24188.1	Eutherian	chr10:62661908-62661934:+	TACAGAGTGAGTTCCAGAACAGACTG	chr9:54222885-54222925:+	TACAGAGTGAGTTCGAGGCCAGCCATGGGCTACATGGTGA	157	1	97	1
10-qB4-6488.1	Murine-specific	9-qA5.3-24188.1	Eutherian	chr10:62661908-62661935:+	TACAGAGTGAGTTCCAGAACAGACTGA	chr9:54222885-54222925:+	TACAGAGTGAGTTCGAGGCCAGCCATGGGCTACATGGTGA	430	1	97	1
10-qB4-6488.1	Murine-specific	9-qA5.3-24188.1	Eutherian	chr10:62661908-62661936:+	TACAGAGTGAGTTCCAGAACAGACTGAG	chr9:54222885-54222925:+	TACAGAGTGAGTTCGAGGCCAGCCATGGGCTACATGGTGA	139	1	97	1
10-qB4-6488.1	Murine-specific	9-qA5.3-24188.1	Eutherian	chr10:62661908-62661937:+	TACAGAGTGAGTTCCAGAACAGACTGAGC	chr9:54222885-54222925:+	TACAGAGTGAGTTCGAGGCCAGCCATGGGCTACATGGTGA	147	1	97	1
10-qB4-6488.1	Murine-specific	9-qA5.3-24188.1	Eutherian	chr10:62661908-62661938:+	TACAGAGTGAGTTCCAGAACAGACTGAGCT	chr9:54222885-54222925:+	TACAGAGTGAGTTCGAGGCCAGCCATGGGCTACATGGTGA	208	1	97	1
11-qE1-9443.1	Murine-specific	9-qA5.3-24188.1	Eutherian	chr11:103429608-103429636:+	TACAGAGTGAGTTCCAGGACAGCGCCAG	chr9:54222885-54222925:+	TACAGAGTGAGTTCGAGGCCAGCCATGGGCTACATGGTGA	162	2	97	1
11-qE1-9443.1	Murine-specific	9-qA5.3-24188.1	Eutherian	chr11:103447069-103447097:+	TACAGAGTGAGTTCTAGGACAGTGAGAC	chr9:54222885-54222925:+	TACAGAGTGAGTTCGAGGCCAGCCATGGGCTACATGGTGA	86	1	97	1
11-qE1-9443.1	Murine-specific	9-qA5.3-24188.1	Eutherian	chr11:103447069-103447098:+	TACAGAGTGAGTTCTAGGACAGTGAGACT	chr9:54222885-54222925:+	TACAGAGTGAGTTCGAGGCCAGCCATGGGCTACATGGTGA	82	1	97	1
11-qE1-9443.1	Murine-specific	9-qA5.3-24188.1	Eutherian	chr11:103447069-103447099:+	TACAGAGTGAGTTCTAGGACAGTGAGACTC	chr9:54222885-54222925:+	TACAGAGTGAGTTCGAGGCCAGCCATGGGCTACATGGTGA	703	1	97	1
9-qC-10667.1	Eutherian	9-qA5.3-24188.1	Eutherian	chr9:67754231-67754259:+	TACAGAGTGAGTTCCAGGACAGCCATAC	chr9:54222885-54222925:+	TACAGAGTGAGTTCGAGGCCAGCCATGGGCTACATGGTGA	185	3	97	1
9-qC-10667.1	Eutherian	9-qA5.3-24188.1	Eutherian	chr9:67754231-67754260:+	TACAGAGTGAGTTCCAGGACAGCCATACA	chr9:54222885-54222925:+	TACAGAGTGAGTTCGAGGCCAGCCATGGGCTACATGGTGA	834	2	97	1
9-qC-10667.1	Eutherian	9-qA5.3-24188.1	Eutherian	chr9:67754231-67754261:+	TACAGAGTGAGTTCCAGGACAGCCATACAG	chr9:54222885-54222925:+	TACAGAGTGAGTTCGAGGCCAGCCATGGGCTACATGGTGA	83	1	97	1
18-qE1-36451.1	Eutherian	9-qA5.3-24188.1	Eutherian	chr18:67064560-67064588:-	CTGGCTGGCATACCCTGACTCCTACCCT	chr9:54238436-54238476:+	CTGGCTGGCATACCCCACCCCCCACCCTGAACTCTCCAGC	63	1	16	1
18-qE1-36451.1	Eutherian	9-qA5.3-24188.1	Eutherian	chr18:67064561-67064588:-	CTGGCTGGCATACCCTGACTCCTACCC	chr9:54238436-54238476:+	CTGGCTGGCATACCCCACCCCCCACCCTGAACTCTCCAGC	163	1	16	1
18-qE1-36451.1	Eutherian	9-qA5.3-24188.1	Eutherian	chr18:67064562-67064588:-	CTGGCTGGCATACCCTGACTCCTACC	chr9:54238436-54238476:+	CTGGCTGGCATACCCCACCCCCCACCCTGAACTCTCCAGC	72	1	16	1
7-qD1-9417.1	Murine-specific	12-qE-23911.1	Eutherian	chr7:69902088-69902118:-	TGTGTTAAAGGCTTTGTCCACAGGGTGGTA	chr12:98396952-98396992:+	TGTGTTAAAAGCTTGGTCACCAGCCTGAGCCGTTTCTAGG	172	1	74	1
7-qD1-9417.1	Murine-specific	12-qE-23911.1	Eutherian	chr7:69902088-69902118:-	TGTGTTAAAGGCTTTGTCCACAGGGTGGTT	chr12:98396952-98396992:+	TGTGTTAAAAGCTTGGTCACCAGCCTGAGCCGTTTCTAGG	79	1	74	1
7-qD1-9417.1	Murine-specific	12-qE-23911.1	Eutherian	chr7:69902089-69902118:-	TGTGTTAAAGGCTTTGTCCACAGGGTGGT	chr12:98396952-98396992:+	TGTGTTAAAAGCTTGGTCACCAGCCTGAGCCGTTTCTAGG	70	1	74	1
7-qD1-9417.1	Murine-specific	12-qE-23911.1	Eutherian	chr7:69902090-69902118:-	TGTGTTAAAGGCTTTGTCCACAGGGTGG	chr12:98396952-98396992:+	TGTGTTAAAAGCTTGGTCACCAGCCTGAGCCGTTTCTAGG	52	1	74	1
7-qD1-9417.1	Murine-specific	12-qE-23911.1	Eutherian	chr7:69902091-69902118:-	TGTGTTAAAGGCTTTGTCCACAGGGTG	chr12:98396952-98396992:+	TGTGTTAAAAGCTTGGTCACCAGCCTGAGCCGTTTCTAGG	105	1	74	1
7-qD1-9417.1	Murine-specific	12-qE-23911.1	Eutherian	chr7:69902093-69902118:-	TGTGTTAAAGGCTTTGTCCACAGGG	chr12:98396952-98396992:+	TGTGTTAAAAGCTTGGTCACCAGCCTGAGCCGTTTCTAGG	41	1	74	1
5-qF-14508.1	Eutherian	14-qC1-1010.1	Mouse-specific	chr5:113323038-113323068:-	TAGAGTTCTTTCATGAGTTCACTGCTGGGC	chr14:44936422-44936462:-	GAGAGTTCTTTCCTGAGCTTACACTCTAGTGCTGACTGGA	571	1	24	1
5-qF-14508.1	Eutherian	14-qC1-1010.1	Mouse-specific	chr5:113323040-113323068:-	TAGAGTTCTTTCATGAGTTCACTGCTGG	chr14:44936422-44936462:-	GAGAGTTCTTTCCTGAGCTTACACTCTAGTGCTGACTGGA	44	1	24	1
5-qF-14508.1	Eutherian	14-qC1-1010.1	Mouse-specific	chr5:113323041-113323068:-	TAGAGTTCTTTCATGAGTTCACTGCTG	chr14:44936422-44936462:-	GAGAGTTCTTTCCTGAGCTTACACTCTAGTGCTGACTGGA	82	1	24	1
5-qF-14508.1	Eutherian	14-qC1-1010.1	Mouse-specific	chr5:113323043-113323068:-	TAGAGTTCTTTCATGAGTTCACTGC	chr14:44936422-44936462:-	GAGAGTTCTTTCCTGAGCTTACACTCTAGTGCTGACTGGA	38	1	24	1
15-qD1-17920.1	Eutherian	18-qE1-1295.1	Mouse-specific	chr15:59267971-59268001:-	TCGATTCCCAGCACACACATGGAATATGTA	chr18:67067720-67067760:-	TCGATTCCCAGCACCCACATAGCAGCTCAACTGTTTGTAA	185	1	17	1
15-qD1-17920.1	Eutherian	18-qE1-1295.1	Mouse-specific	chr15:59267972-59268001:-	TCGATTCCCAGCACACACATGGAATATGT	chr18:67067720-67067760:-	TCGATTCCCAGCACCCACATAGCAGCTCAACTGTTTGTAA	47	1	17	1
15-qD1-17920.1	Eutherian	18-qE1-1295.1	Mouse-specific	chr15:59267977-59268001:-	TCGATTCCCAGCACACACATGGAA	chr18:67067720-67067760:-	TCGATTCCCAGCACCCACATAGCAGCTCAACTGTTTGTAA	49	1	17	1
7-qD1-9417.1	Murine-specific	7-qD2-11976.1	Eutherian	chr7:69886563-69886594:-	TTGGACTTCTGGTCTCCAGTTCTCGAGCCCT	chr7:73821455-73821495:-	TTGGACTTCTGGTCTCCAGAACCAGGAGAGAAGAAGTACT	423	1	31	1
7-qD1-9417.1	Murine-specific	7-qD2-11976.1	Eutherian	chr7:69886563-69886594:-	TTGGACTTCTGGTCTCCAGTTCTCGAGCCCA	chr7:73821455-73821495:-	TTGGACTTCTGGTCTCCAGAACCAGGAGAGAAGAAGTACT	99	1	31	1
7-qD1-9417.1	Murine-specific	7-qD2-11976.1	Eutherian	chr7:69886564-69886594:-	TTGGACTTCTGGTCTCCAGTTCTCGAGCCT	chr7:73821455-73821495:-	TTGGACTTCTGGTCTCCAGAACCAGGAGAGAAGAAGTACT	1740	1	31	1
7-qD1-9417.1	Murine-specific	7-qD2-11976.1	Eutherian	chr7:69886564-69886594:-	TTGGACTTCTGGTCTCCAGTTCTCGAGCCC	chr7:73821455-73821495:-	TTGGACTTCTGGTCTCCAGAACCAGGAGAGAAGAAGTACT	5138	1	31	1
7-qD1-9417.1	Murine-specific	7-qD2-11976.1	Eutherian	chr7:69886564-69886594:-	TTGGACTTCTGGTCTCCAGTTCTCGAGCCA	chr7:73821455-73821495:-	TTGGACTTCTGGTCTCCAGAACCAGGAGAGAAGAAGTACT	61	1	31	1
7-qD1-9417.1	Murine-specific	7-qD2-11976.1	Eutherian	chr7:69886564-69886594:-	TTGGACTTCTGGTCTCCAGTTCTCTAGCCC	chr7:73821455-73821495:-	TTGGACTTCTGGTCTCCAGAACCAGGAGAGAAGAAGTACT	64	1	31	1
7-qD1-9417.1	Murine-specific	7-qD2-11976.1	Eutherian	chr7:69886565-69886594:-	TTGGACTTCTGGTCTCCAGTTCTCGAGCT	chr7:73821455-73821495:-	TTGGACTTCTGGTCTCCAGAACCAGGAGAGAAGAAGTACT	399	1	31	1
7-qD1-9417.1	Murine-specific	7-qD2-11976.1	Eutherian	chr7:69886565-69886594:-	TTGGACTTCTGGTCTCCAGTTCTCGAGCA	chr7:73821455-73821495:-	TTGGACTTCTGGTCTCCAGAACCAGGAGAGAAGAAGTACT	61	1	31	1
7-qD1-9417.1	Murine-specific	7-qD2-11976.1	Eutherian	chr7:69886565-69886594:-	TTGGACTTCTGGTCTCCAGTTCTCGAGCC	chr7:73821455-73821495:-	TTGGACTTCTGGTCTCCAGAACCAGGAGAGAAGAAGTACT	7161	1	31	1
7-qD1-9417.1	Murine-specific	7-qD2-11976.1	Eutherian	chr7:69886566-69886594:-	TTGGACTTCTGGTCTCCAGTTCTCGAGA	chr7:73821455-73821495:-	TTGGACTTCTGGTCTCCAGAACCAGGAGAGAAGAAGTACT	31	1	31	1
7-qD1-9417.1	Murine-specific	7-qD2-11976.1	Eutherian	chr7:69886566-69886594:-	TTGGACTTCTGGTCTCCAGTTCTCGAGT	chr7:73821455-73821495:-	TTGGACTTCTGGTCTCCAGAACCAGGAGAGAAGAAGTACT	465	1	31	1
7-qD1-9417.1	Murine-specific	7-qD2-11976.1	Eutherian	chr7:69886566-69886594:-	TTGGACTTCTGGTCTCCAGTTCTCGAGC	chr7:73821455-73821495:-	TTGGACTTCTGGTCTCCAGAACCAGGAGAGAAGAAGTACT	5625	1	31	1
7-qD1-9417.1	Murine-specific	7-qD2-11976.1	Eutherian	chr7:69886567-69886594:-	TTGGACTTCTGGTCTCCAGTTCTCGAG	chr7:73821455-73821495:-	TTGGACTTCTGGTCTCCAGAACCAGGAGAGAAGAAGTACT	236	1	31	1
7-qD1-9417.1	Murine-specific	7-qD2-11976.1	Eutherian	chr7:69886568-69886594:-	TTGGACTTCTGGTCTCCAGTTCTCGA	chr7:73821455-73821495:-	TTGGACTTCTGGTCTCCAGAACCAGGAGAGAAGAAGTACT	33	1	31	1
17-qA3.3-26735.1	Eutherian	12-qE-7089.1	Eutherian	chr17:27340254-27340282:+	TTGAGCAAAAGAAGTCAGACATAAAAGG	chr12:98427679-98427719:-	TTGAGCAAAAGGAGTCAGCCAAGTCCCATCAGAAGAGAGC	43	1	60	1
17-qA3.3-26735.1	Eutherian	12-qE-7089.1	Eutherian	chr17:27340254-27340284:+	TTGAGCAAAAGAAGTCAGACATAAAAGGGC	chr12:98427679-98427719:-	TTGAGCAAAAGGAGTCAGCCAAGTCCCATCAGAAGAGAGC	52	1	60	1
8-qE1-3748.1	Murine-specific	15-qD1-17920.1	Eutherian	chr8:110123010-110123034:+	ATGCATTGTAGGATGATTGGCACT	chr15:59263938-59263978:+	ATGCATTGTAGGATGTGTGGTTGCACCTTGCGTCTGTACC	145	1	26	1
8-qE1-3748.1	Murine-specific	15-qD1-17920.1	Eutherian	chr8:110123010-110123035:+	ATGCATTGTAGGATGATTGGCACTA	chr15:59263938-59263978:+	ATGCATTGTAGGATGTGTGGTTGCACCTTGCGTCTGTACC	576	1	26	1
8-qE1-3748.1	Murine-specific	15-qD1-17920.1	Eutherian	chr8:110123010-110123036:+	ATGCATTGTAGGATGATTGGCACTAT	chr15:59263938-59263978:+	ATGCATTGTAGGATGTGTGGTTGCACCTTGCGTCTGTACC	539	1	26	1
8-qE1-3748.1	Murine-specific	15-qD1-17920.1	Eutherian	chr8:110123010-110123037:+	ATGCATTGTAGGATGATTGGCACTATT	chr15:59263938-59263978:+	ATGCATTGTAGGATGTGTGGTTGCACCTTGCGTCTGTACC	218	1	26	1
8-qE1-3748.1	Murine-specific	15-qD1-17920.1	Eutherian	chr8:110123010-110123037:+	ATGCATTGTAGGATGATTGGCACTATC	chr15:59263938-59263978:+	ATGCATTGTAGGATGTGTGGTTGCACCTTGCGTCTGTACC	2403	1	26	1
8-qE1-3748.1	Murine-specific	15-qD1-17920.1	Eutherian	chr8:110123010-110123038:+	ATGCATTGTAGGATGATTGGCACTATCT	chr15:59263938-59263978:+	ATGCATTGTAGGATGTGTGGTTGCACCTTGCGTCTGTACC	234	1	26	1
8-qE1-3748.1	Murine-specific	15-qD1-17920.1	Eutherian	chr8:110123010-110123038:+	ATGCATTGTAGGATGATTGGCACTATCC	chr15:59263938-59263978:+	ATGCATTGTAGGATGTGTGGTTGCACCTTGCGTCTGTACC	2687	1	26	1
8-qE1-3748.1	Murine-specific	15-qD1-17920.1	Eutherian	chr8:110123010-110123039:+	ATGCATTGTAGGATGATTGGCACTATCCT	chr15:59263938-59263978:+	ATGCATTGTAGGATGTGTGGTTGCACCTTGCGTCTGTACC	40	1	26	1
8-qE1-3748.1	Murine-specific	15-qD1-17920.1	Eutherian	chr8:110123010-110123039:+	ATGCATTGTAGGATGATTGGCACTATCCA	chr15:59263938-59263978:+	ATGCATTGTAGGATGTGTGGTTGCACCTTGCGTCTGTACC	58	1	26	1
8-qE1-3748.1	Murine-specific	15-qD1-17920.1	Eutherian	chr8:110123010-110123040:+	ATGCATTGTAGGATGATTGGCACTATCCAC	chr15:59263938-59263978:+	ATGCATTGTAGGATGTGTGGTTGCACCTTGCGTCTGTACC	3945	1	26	1
8-qE1-3748.1	Murine-specific	15-qD1-17920.1	Eutherian	chr8:110123010-110123040:+	ATGCATTGTAGGATGATTGGCACTATCCAT	chr15:59263938-59263978:+	ATGCATTGTAGGATGTGTGGTTGCACCTTGCGTCTGTACC	594	1	26	1
8-qE1-3748.1	Murine-specific	15-qD1-17920.1	Eutherian	chr8:110123010-110123041:+	ATGCATTGTAGGATGATTTGCACTATCCACC	chr15:59263938-59263978:+	ATGCATTGTAGGATGTGTGGTTGCACCTTGCGTCTGTACC	32	1	26	1
8-qE1-3748.1	Murine-specific	15-qD1-17920.1	Eutherian	chr8:110123010-110123041:+	ATGCATTGTAGGATGATTGGCACTATCCACT	chr15:59263938-59263978:+	ATGCATTGTAGGATGTGTGGTTGCACCTTGCGTCTGTACC	3291	1	26	1
8-qE1-3748.1	Murine-specific	15-qD1-17920.1	Eutherian	chr8:110123010-110123041:+	ATGCATTGTAGGATGATTGGCACTATCCACC	chr15:59263938-59263978:+	ATGCATTGTAGGATGTGTGGTTGCACCTTGCGTCTGTACC	4215	1	26	1
8-qE1-3748.1	Murine-specific	15-qD1-17920.1	Eutherian	chr8:110123010-110123041:+	ATGCATTGTAGGATGATTGGCACTATCCACA	chr15:59263938-59263978:+	ATGCATTGTAGGATGTGTGGTTGCACCTTGCGTCTGTACC	88	1	26	1
8-qE1-3748.1	Murine-specific	15-qD1-17920.1	Eutherian	chr8:110123010-110123042:+	ATGCATTGTAGGATGATTGGCACTATCCACCT	chr15:59263938-59263978:+	ATGCATTGTAGGATGTGTGGTTGCACCTTGCGTCTGTACC	173	1	26	1
8-qE1-3748.1	Murine-specific	15-qD1-17920.1	Eutherian	chr8:110123010-110123042:+	ATGCATTGTAGGATGATTGGCACTATCCACCC	chr15:59263938-59263978:+	ATGCATTGTAGGATGTGTGGTTGCACCTTGCGTCTGTACC	228	1	26	1
10-qB4-6488.1	Murine-specific	10-qC1-12816.1	Murine-specific	chr10:62661908-62661933:+	TACAGAGTGAGTTCCAGAACAGACT	chr10:75847788-75847828:-	TACAGAGTGAGTTCCAGGATCAGCCAGGACTATACAGAGA	55	1	25	1
10-qB4-6488.1	Murine-specific	10-qC1-12816.1	Murine-specific	chr10:62661908-62661934:+	TACAGAGTGAGTTCCAGAACAGACTG	chr10:75847788-75847828:-	TACAGAGTGAGTTCCAGGATCAGCCAGGACTATACAGAGA	157	1	25	1
10-qB4-6488.1	Murine-specific	10-qC1-12816.1	Murine-specific	chr10:62661908-62661935:+	TACAGAGTGAGTTCCAGAACAGACTGA	chr10:75847788-75847828:-	TACAGAGTGAGTTCCAGGATCAGCCAGGACTATACAGAGA	430	1	25	1
10-qB4-6488.1	Murine-specific	10-qC1-12816.1	Murine-specific	chr10:62661908-62661936:+	TACAGAGTGAGTTCCAGAACAGACTGAG	chr10:75847788-75847828:-	TACAGAGTGAGTTCCAGGATCAGCCAGGACTATACAGAGA	139	1	25	1
10-qB4-6488.1	Murine-specific	10-qC1-12816.1	Murine-specific	chr10:62661908-62661937:+	TACAGAGTGAGTTCCAGAACAGACTGAGC	chr10:75847788-75847828:-	TACAGAGTGAGTTCCAGGATCAGCCAGGACTATACAGAGA	147	1	25	1
10-qB4-6488.1	Murine-specific	10-qC1-12816.1	Murine-specific	chr10:62661908-62661938:+	TACAGAGTGAGTTCCAGAACAGACTGAGCT	chr10:75847788-75847828:-	TACAGAGTGAGTTCCAGGATCAGCCAGGACTATACAGAGA	208	1	25	1
11-qE1-9443.1	Murine-specific	10-qC1-12816.1	Murine-specific	chr11:103429608-103429636:+	TACAGAGTGAGTTCCAGGACAGCGCCAG	chr10:75847788-75847828:-	TACAGAGTGAGTTCCAGGATCAGCCAGGACTATACAGAGA	162	2	25	1
11-qE1-9443.1	Murine-specific	10-qC1-12816.1	Murine-specific	chr11:103447069-103447097:+	TACAGAGTGAGTTCTAGGACAGTGAGAC	chr10:75847788-75847828:-	TACAGAGTGAGTTCCAGGATCAGCCAGGACTATACAGAGA	86	1	25	1
11-qE1-9443.1	Murine-specific	10-qC1-12816.1	Murine-specific	chr11:103447069-103447098:+	TACAGAGTGAGTTCTAGGACAGTGAGACT	chr10:75847788-75847828:-	TACAGAGTGAGTTCCAGGATCAGCCAGGACTATACAGAGA	82	1	25	1
11-qE1-9443.1	Murine-specific	10-qC1-12816.1	Murine-specific	chr11:103447069-103447099:+	TACAGAGTGAGTTCTAGGACAGTGAGACTC	chr10:75847788-75847828:-	TACAGAGTGAGTTCCAGGATCAGCCAGGACTATACAGAGA	703	1	25	1
9-qC-10667.1	Eutherian	10-qC1-12816.1	Murine-specific	chr9:67754231-67754259:+	TACAGAGTGAGTTCCAGGACAGCCATAC	chr10:75847788-75847828:-	TACAGAGTGAGTTCCAGGATCAGCCAGGACTATACAGAGA	185	3	25	1
9-qC-10667.1	Eutherian	10-qC1-12816.1	Murine-specific	chr9:67754231-67754260:+	TACAGAGTGAGTTCCAGGACAGCCATACA	chr10:75847788-75847828:-	TACAGAGTGAGTTCCAGGATCAGCCAGGACTATACAGAGA	834	2	25	1
9-qC-10667.1	Eutherian	10-qC1-12816.1	Murine-specific	chr9:67754231-67754261:+	TACAGAGTGAGTTCCAGGACAGCCATACAG	chr10:75847788-75847828:-	TACAGAGTGAGTTCCAGGATCAGCCAGGACTATACAGAGA	83	1	25	1
8-qE1-3748.1	Murine-specific	6-qC3-6258.1	Murine-specific	chr8:110123787-110123813:+	TTTATTTGGCACCTGCAGGCAAATGG	chr6:81894868-81894908:+	TTTATTTGACACCTACAGACCCCACCAGGAAGTTCTTAAG	34	1	23	1
10-qB4-6488.1	Murine-specific	15-qD1-4001.1	Murine-specific	chr10:62684097-62684122:+	TACAAGACTGAGTGGGTAAGATGGA	chr15:59285120-59285160:-	TACAAGATTGAGTGGATATGTCTGGTGAGAGCGCCATGCT	39	1	14	1
10-qB4-6488.1	Murine-specific	15-qD1-4001.1	Murine-specific	chr10:62684097-62684124:+	TACAAGACTGAGTGGGTAAGATGGAGG	chr15:59285120-59285160:-	TACAAGATTGAGTGGATATGTCTGGTGAGAGCGCCATGCT	31	1	14	1
10-qB4-6488.1	Murine-specific	15-qD3-14639.1	Murine-specific	chr10:62678240-62678270:+	TGAGTTCGAGCCCAGCCTGGTCTACCGAGT	chr15:74649539-74649579:-	TGAGTTCGAGGCCAGCCTGGTCTACAAAGTGAGTTCCAGG	59	1	13	1
9-qC-10667.1	Eutherian	15-qD3-14639.1	Murine-specific	chr9:67742129-67742157:+	TGAGTTCAAGGACAGCCTGGTCTAAAAG	chr15:74649539-74649579:-	TGAGTTCGAGGCCAGCCTGGTCTACAAAGTGAGTTCCAGG	41	1	13	1
9-qC-10667.1	Eutherian	15-qD3-14639.1	Murine-specific	chr9:67742129-67742158:+	TGAGTTCAAGGACAGCCTGGTCTAAAAGT	chr15:74649539-74649579:-	TGAGTTCGAGGCCAGCCTGGTCTACAAAGTGAGTTCCAGG	86	1	13	1
7-qD2-11976.1	Eutherian	9-qA5.3-24188.1	Eutherian	chr7:73820406-73820431:+	TGTCTTTGGTTGGTGGGTCAGTCTC	chr9:54235983-54236023:+	GGTCTTTGGTTGGTGGTTCAATCTCTATGAACCCCCGTGG	57	1	14	1
7-qD2-11976.1	Eutherian	9-qA5.3-24188.1	Eutherian	chr7:73820406-73820432:+	TGTCTTTGGTTGGTGGGTCAGTCTCT	chr9:54235983-54236023:+	GGTCTTTGGTTGGTGGTTCAATCTCTATGAACCCCCGTGG	184	1	14	1
7-qD2-11976.1	Eutherian	9-qA5.3-24188.1	Eutherian	chr7:73820406-73820434:+	TGTCTTTGGTTGGTGGGTCAGTCTCTGG	chr9:54235983-54236023:+	GGTCTTTGGTTGGTGGTTCAATCTCTATGAACCCCCGTGG	76	1	14	1
10-qB4-6488.1	Murine-specific	9-qC-10667.1	Eutherian	chr10:62676286-62676316:+	TTTAATCCCAGTTCTCGGGAGTTTGAGAGC	chr9:67758448-67758488:-	TTTAATCCCAGCACTCGGGAGGCAGAGGCAGGTGGATTTC	40	1	35	1
10-qB4-6488.1	Murine-specific	9-qC-10667.1	Eutherian	chr10:62688647-62688673:+	TTTAATCTTAGCACTGGGGAGACTGA	chr9:67758448-67758488:-	TTTAATCCCAGCACTCGGGAGGCAGAGGCAGGTGGATTTC	42	1	35	1
10-qB4-6488.1	Murine-specific	9-qC-10667.1	Eutherian	chr10:62688647-62688675:+	TTTAATCTTAGCACTGGGGAGACTGAGT	chr9:67758448-67758488:-	TTTAATCCCAGCACTCGGGAGGCAGAGGCAGGTGGATTTC	47	1	35	1
10-qB4-6488.1	Murine-specific	9-qC-10667.1	Eutherian	chr10:62688647-62688675:+	TTTAATCTTAGCACTGGGGAGACTGAGA	chr9:67758448-67758488:-	TTTAATCCCAGCACTCGGGAGGCAGAGGCAGGTGGATTTC	75	1	35	1
10-qB4-6488.1	Murine-specific	9-qC-10667.1	Eutherian	chr10:62688647-62688676:+	TTTAATCTTAGCACTGGGGAGACTGAGAT	chr9:67758448-67758488:-	TTTAATCCCAGCACTCGGGAGGCAGAGGCAGGTGGATTTC	181	1	35	1
11-qE1-9443.1	Murine-specific	9-qC-10667.1	Eutherian	chr11:103447005-103447031:+	TTTAATCCCAGGACCCGGAAAGCAAA	chr9:67758448-67758488:-	TTTAATCCCAGCACTCGGGAGGCAGAGGCAGGTGGATTTC	55	1	35	1
11-qE1-9443.1	Murine-specific	9-qC-10667.1	Eutherian	chr11:103447005-103447032:+	TTTAATCCCAGGACCCGGAAAGCAAAG	chr9:67758448-67758488:-	TTTAATCCCAGCACTCGGGAGGCAGAGGCAGGTGGATTTC	72	1	35	1
11-qE1-9443.1	Murine-specific	9-qC-10667.1	Eutherian	chr11:103447005-103447033:+	TTTAATCCCAGGACCCGGAAAGCAAAGG	chr9:67758448-67758488:-	TTTAATCCCAGCACTCGGGAGGCAGAGGCAGGTGGATTTC	61	1	35	1
11-qE1-9443.1	Murine-specific	9-qC-10667.1	Eutherian	chr11:103447005-103447033:+	TTTAATCCCAGGACCCGGAAAGCAAAGT	chr9:67758448-67758488:-	TTTAATCCCAGCACTCGGGAGGCAGAGGCAGGTGGATTTC	63	1	35	1
11-qE1-9443.1	Murine-specific	9-qC-10667.1	Eutherian	chr11:103447005-103447034:+	TTTAATCCCAGGACCCGGAAAGCAAAGGC	chr9:67758448-67758488:-	TTTAATCCCAGCACTCGGGAGGCAGAGGCAGGTGGATTTC	348	1	35	1
11-qE1-9443.1	Murine-specific	9-qC-10667.1	Eutherian	chr11:103447005-103447035:+	TTTAATCCCAGGACCCGGAAAGCAAAGGCA	chr9:67758448-67758488:-	TTTAATCCCAGCACTCGGGAGGCAGAGGCAGGTGGATTTC	192	1	35	1
11-qE1-9443.1	Murine-specific	9-qC-10667.1	Eutherian	chr11:103447005-103447036:+	TTTAATCCCAGGACCCGGAAAGCAAAGGCAG	chr9:67758448-67758488:-	TTTAATCCCAGCACTCGGGAGGCAGAGGCAGGTGGATTTC	53	1	35	1
11-qE1-9443.1	Murine-specific	9-qC-10667.1	Eutherian	chr11:103447005-103447037:+	TTTAATCCCAGGACCCGGAAAGCAAAGGCAGT	chr9:67758448-67758488:-	TTTAATCCCAGCACTCGGGAGGCAGAGGCAGGTGGATTTC	33	1	35	1
15-qD3-14639.1	Murine-specific	9-qC-10667.1	Eutherian	chr15:74657262-74657288:+	TTTAATCACAGCACTAGGGAAACAGA	chr9:67758448-67758488:-	TTTAATCCCAGCACTCGGGAGGCAGAGGCAGGTGGATTTC	65	2	35	1
15-qD3-14639.1	Murine-specific	9-qC-10667.1	Eutherian	chr15:74657262-74657289:+	TTTAATCACAGCACTAGGGAAACAGAA	chr9:67758448-67758488:-	TTTAATCCCAGCACTCGGGAGGCAGAGGCAGGTGGATTTC	149	1	35	1
15-qD3-14639.1	Murine-specific	9-qC-10667.1	Eutherian	chr15:74657262-74657290:+	TTTAATCACAGCACTAGGGAAACAGAAG	chr9:67758448-67758488:-	TTTAATCCCAGCACTCGGGAGGCAGAGGCAGGTGGATTTC	378	1	35	1
15-qD3-14639.1	Murine-specific	9-qC-10667.1	Eutherian	chr15:74657262-74657291:+	TTTAATCACAGCACTAGGGAAACAGAAGC	chr9:67758448-67758488:-	TTTAATCCCAGCACTCGGGAGGCAGAGGCAGGTGGATTTC	1836	1	35	1
15-qD3-14639.1	Murine-specific	9-qC-10667.1	Eutherian	chr15:74657262-74657291:+	TTTAATCACAGCACTAGGGAAACAGAAGT	chr9:67758448-67758488:-	TTTAATCCCAGCACTCGGGAGGCAGAGGCAGGTGGATTTC	81	1	35	1
15-qD3-14639.1	Murine-specific	9-qC-10667.1	Eutherian	chr15:74657262-74657292:+	TTTAATCACAGCACTAGGGAAACAGAAGCT	chr9:67758448-67758488:-	TTTAATCCCAGCACTCGGGAGGCAGAGGCAGGTGGATTTC	1523	1	35	1
15-qD3-14639.1	Murine-specific	9-qC-10667.1	Eutherian	chr15:74657262-74657293:+	TTTAATCACAGCACTAGGGAAACAGAAGCTT	chr9:67758448-67758488:-	TTTAATCCCAGCACTCGGGAGGCAGAGGCAGGTGGATTTC	195	1	35	1
17-qA3.3-27363.1	Eutherian	9-qC-10667.1	Eutherian	chr17:27297330-27297360:-	TTTAATCCCAGCACTCACGCAGAAAAGGCA	chr9:67758448-67758488:-	TTTAATCCCAGCACTCGGGAGGCAGAGGCAGGTGGATTTC	34	1	35	1
5-qF-14224.1	Eutherian	9-qC-10667.1	Eutherian	chr5:113343582-113343610:+	TTTAATCCCAGCTCTTGGGAGGCGGAGG	chr9:67758448-67758488:-	TTTAATCCCAGCACTCGGGAGGCAGAGGCAGGTGGATTTC	253	4	35	1
5-qF-14224.1	Eutherian	9-qC-10667.1	Eutherian	chr5:113343582-113343611:+	TTTAATCCCAGCTCTTGGGAGGCGGAGGC	chr9:67758448-67758488:-	TTTAATCCCAGCACTCGGGAGGCAGAGGCAGGTGGATTTC	174	4	35	1
9-qA5.3-1495.1	Murine-specific	9-qC-10667.1	Eutherian	chr9:54249982-54250008:+	TTTAATCTCAGCACCGTGGAGGCAGA	chr9:67758448-67758488:-	TTTAATCCCAGCACTCGGGAGGCAGAGGCAGGTGGATTTC	47	1	35	1
9-qA5.3-1495.1	Murine-specific	9-qC-10667.1	Eutherian	chr9:54249982-54250011:+	TTTAATCTCAGCACCGTGGAGGCAGAGGC	chr9:67758448-67758488:-	TTTAATCCCAGCACTCGGGAGGCAGAGGCAGGTGGATTTC	60	1	35	1
9-qA5.3-1495.1	Murine-specific	9-qC-10667.1	Eutherian	chr9:54249982-54250012:+	TTTAATCTCAGCACCGTGGAGGCAGAGGCT	chr9:67758448-67758488:-	TTTAATCCCAGCACTCGGGAGGCAGAGGCAGGTGGATTTC	41	1	35	1
2-qF1-2536.1	Murine-specific	6-qC3-100.1	Murine-specific	chr2:127699732-127699759:+	ATCCATGTATGCAAATGTGACTCTCTG	chr6:83585875-83585915:-	ATCCATGTAAGCAAATATGACCTCCCCGACAGCGGGGCCT	92	1	780	1
2-qF1-2536.1	Murine-specific	6-qC3-100.1	Murine-specific	chr2:127699732-127699760:+	ATCCATGTATGCAAATGTGACTCTCTGA	chr6:83585875-83585915:-	ATCCATGTAAGCAAATATGACCTCCCCGACAGCGGGGCCT	242	1	780	1
2-qF1-2536.1	Murine-specific	6-qC3-100.1	Murine-specific	chr2:127699732-127699761:+	ATCCATGTATGCAAATGTGACTCTCTGAG	chr6:83585875-83585915:-	ATCCATGTAAGCAAATATGACCTCCCCGACAGCGGGGCCT	151	1	780	1
2-qF1-2536.1	Murine-specific	6-qC3-100.1	Murine-specific	chr2:127699732-127699762:+	ATCCATGTATGCAAATGTGACTCTCTGAGT	chr6:83585875-83585915:-	ATCCATGTAAGCAAATATGACCTCCCCGACAGCGGGGCCT	63	1	780	1
2-qF1-2536.1	Murine-specific	6-qC3-100.1	Murine-specific	chr2:127699732-127699762:+	ATCCATGTATGCAAATGTGACTCTCTGAGG	chr6:83585875-83585915:-	ATCCATGTAAGCAAATATGACCTCCCCGACAGCGGGGCCT	813	1	780	1
2-qF1-2536.1	Murine-specific	6-qC3-100.1	Murine-specific	chr2:127699732-127699763:+	ATCCATGTATGCAAATGTGACTCTCTGAGGT	chr6:83585875-83585915:-	ATCCATGTAAGCAAATATGACCTCCCCGACAGCGGGGCCT	318	1	780	1
2-qF1-2536.1	Murine-specific	6-qC3-100.1	Murine-specific	chr2:127699732-127699763:+	ATCCATGTATGCAAATGTGACTCTCTGAGGG	chr6:83585875-83585915:-	ATCCATGTAAGCAAATATGACCTCCCCGACAGCGGGGCCT	46	1	780	1
2-qF1-2536.1	Murine-specific	6-qC3-100.1	Murine-specific	chr2:127699732-127699764:+	ATCCATGTATGCAAATGTGACTCTCTGAGGGC	chr6:83585875-83585915:-	ATCCATGTAAGCAAATATGACCTCCCCGACAGCGGGGCCT	55	1	780	1
5-qG3-23659.1	Eutherian	9-qF4-150.1	Murine-specific	chr5:149826601-149826631:-	TGAGATTAAAGGCATGCGCCACCACCACCT	chr9:122802760-122802800:+	TGAGATTAAAGGTGTGCTCCACTACGCCCGGCCTACCTTT	131	2	18	1
15-qD3-14639.1	Murine-specific	15-qD1-17920.1	Eutherian	chr15:74646045-74646071:+	TGGTCATCTAGAGGGTACTGCCAAGT	chr15:59270205-59270245:+	TGGTCATGTAGAGGTTGCTGGCCTCCACCCTCTCTGGTTT	54	1	28	1
15-qD3-14639.1	Murine-specific	15-qD1-17920.1	Eutherian	chr15:74646045-74646073:+	TGGTCATCTAGAGGGTACTGCCAAGTTC	chr15:59270205-59270245:+	TGGTCATGTAGAGGTTGCTGGCCTCCACCCTCTCTGGTTT	157	1	28	1
15-qD3-14639.1	Murine-specific	15-qD1-17920.1	Eutherian	chr15:74646045-74646074:+	TGGTCATCTAGAGGGTACTGCCAAGTTCA	chr15:59270205-59270245:+	TGGTCATGTAGAGGTTGCTGGCCTCCACCCTCTCTGGTTT	309	1	28	1
15-qD3-14639.1	Murine-specific	15-qD1-17920.1	Eutherian	chr15:74646045-74646074:+	TGGTCATCTAGAGGGTACTGCCAAGTTCT	chr15:59270205-59270245:+	TGGTCATGTAGAGGTTGCTGGCCTCCACCCTCTCTGGTTT	90	1	28	1
15-qD3-14639.1	Murine-specific	15-qD1-17920.1	Eutherian	chr15:74646045-74646075:+	TGGTCATCTAGAGGGTACTGCCAAGTTCAT	chr15:59270205-59270245:+	TGGTCATGTAGAGGTTGCTGGCCTCCACCCTCTCTGGTTT	83	1	28	1
2-qF1-2536.1	Murine-specific	19-qC2-1361.1	Murine-specific	chr2:127691987-127692017:+	TACAGAGTAAGGCCCTGTCTCAAAAAAGAA	chr19:37255595-37255635:+	TACAGAGTAAGAGCCTGTCTCCAAATTTTTTTTTTAATCA	37	1	170	1
11-qE1-9443.1	Murine-specific	6-qF3-28913.1	Murine-specific	chr11:103441907-103441931:+	TCCTGTTCTGATTTCCTTTGACTG	chr6:127804898-127804938:-	TCCTGTTCTGACTTCTTTTGAGGATGAAGAGTAATATGGA	43	1	70	1
11-qE1-9443.1	Murine-specific	6-qF3-28913.1	Murine-specific	chr11:103441907-103441932:+	TCCTGTTCTGATTTCCTTTGACTGT	chr6:127804898-127804938:-	TCCTGTTCTGACTTCTTTTGAGGATGAAGAGTAATATGGA	105	1	70	1
11-qE1-9443.1	Murine-specific	6-qF3-28913.1	Murine-specific	chr11:103441907-103441935:+	TCCTGTTCTGATTTCCTTTGACTGTGAT	chr6:127804898-127804938:-	TCCTGTTCTGACTTCTTTTGAGGATGAAGAGTAATATGGA	61	1	70	1
11-qE1-9443.1	Murine-specific	6-qF3-28913.1	Murine-specific	chr11:103441907-103441936:+	TCCTGTTCTGATTTCCTTTGACTGTGATG	chr6:127804898-127804938:-	TCCTGTTCTGACTTCTTTTGAGGATGAAGAGTAATATGGA	240	1	70	1
11-qE1-9443.1	Murine-specific	6-qF3-28913.1	Murine-specific	chr11:103441907-103441937:+	TCCTGTTCTGATTTCCTTTGACTGTGATGT	chr6:127804898-127804938:-	TCCTGTTCTGACTTCTTTTGAGGATGAAGAGTAATATGGA	998	1	70	1
10-qB4-6488.1	Murine-specific	7-qD1-19431.1	Eutherian	chr10:62661908-62661933:+	TACAGAGTGAGTTCCAGAACAGACT	chr7:73137875-73137915:-	TACAGAGTGTGTTTCAGGACAGCCAGGACCCCACAGAGAA	55	1	63	1
10-qB4-6488.1	Murine-specific	7-qD1-19431.1	Eutherian	chr10:62661908-62661934:+	TACAGAGTGAGTTCCAGAACAGACTG	chr7:73137875-73137915:-	TACAGAGTGTGTTTCAGGACAGCCAGGACCCCACAGAGAA	157	1	63	1
10-qB4-6488.1	Murine-specific	7-qD1-19431.1	Eutherian	chr10:62661908-62661935:+	TACAGAGTGAGTTCCAGAACAGACTGA	chr7:73137875-73137915:-	TACAGAGTGTGTTTCAGGACAGCCAGGACCCCACAGAGAA	430	1	63	1
10-qB4-6488.1	Murine-specific	7-qD1-19431.1	Eutherian	chr10:62661908-62661936:+	TACAGAGTGAGTTCCAGAACAGACTGAG	chr7:73137875-73137915:-	TACAGAGTGTGTTTCAGGACAGCCAGGACCCCACAGAGAA	139	1	63	1
10-qB4-6488.1	Murine-specific	7-qD1-19431.1	Eutherian	chr10:62661908-62661937:+	TACAGAGTGAGTTCCAGAACAGACTGAGC	chr7:73137875-73137915:-	TACAGAGTGTGTTTCAGGACAGCCAGGACCCCACAGAGAA	147	1	63	1
10-qB4-6488.1	Murine-specific	7-qD1-19431.1	Eutherian	chr10:62661908-62661938:+	TACAGAGTGAGTTCCAGAACAGACTGAGCT	chr7:73137875-73137915:-	TACAGAGTGTGTTTCAGGACAGCCAGGACCCCACAGAGAA	208	1	63	1
11-qE1-9443.1	Murine-specific	7-qD1-19431.1	Eutherian	chr11:103429608-103429636:+	TACAGAGTGAGTTCCAGGACAGCGCCAG	chr7:73137875-73137915:-	TACAGAGTGTGTTTCAGGACAGCCAGGACCCCACAGAGAA	162	2	63	1
11-qE1-9443.1	Murine-specific	7-qD1-19431.1	Eutherian	chr11:103447069-103447097:+	TACAGAGTGAGTTCTAGGACAGTGAGAC	chr7:73137875-73137915:-	TACAGAGTGTGTTTCAGGACAGCCAGGACCCCACAGAGAA	86	1	63	1
11-qE1-9443.1	Murine-specific	7-qD1-19431.1	Eutherian	chr11:103447069-103447098:+	TACAGAGTGAGTTCTAGGACAGTGAGACT	chr7:73137875-73137915:-	TACAGAGTGTGTTTCAGGACAGCCAGGACCCCACAGAGAA	82	1	63	1
11-qE1-9443.1	Murine-specific	7-qD1-19431.1	Eutherian	chr11:103447069-103447099:+	TACAGAGTGAGTTCTAGGACAGTGAGACTC	chr7:73137875-73137915:-	TACAGAGTGTGTTTCAGGACAGCCAGGACCCCACAGAGAA	703	1	63	1
9-qC-10667.1	Eutherian	7-qD1-19431.1	Eutherian	chr9:67754231-67754259:+	TACAGAGTGAGTTCCAGGACAGCCATAC	chr7:73137875-73137915:-	TACAGAGTGTGTTTCAGGACAGCCAGGACCCCACAGAGAA	185	3	63	1
9-qC-10667.1	Eutherian	7-qD1-19431.1	Eutherian	chr9:67754231-67754260:+	TACAGAGTGAGTTCCAGGACAGCCATACA	chr7:73137875-73137915:-	TACAGAGTGTGTTTCAGGACAGCCAGGACCCCACAGAGAA	834	2	63	1
9-qC-10667.1	Eutherian	7-qD1-19431.1	Eutherian	chr9:67754231-67754261:+	TACAGAGTGAGTTCCAGGACAGCCATACAG	chr7:73137875-73137915:-	TACAGAGTGTGTTTCAGGACAGCCAGGACCCCACAGAGAA	83	1	63	1
6-qF3-28913.1	Murine-specific	11-qE1-9443.1	Murine-specific	chr6:127835770-127835795:+	TACTTTGCAGTCTGTGTTCTCCTTT	chr11:103434440-103434480:-	CACTTTGCAATCTGTGTGTGCCTGAATTCTTTAAACAAGA	59	1	77	1
6-qF3-28913.1	Murine-specific	11-qE1-9443.1	Murine-specific	chr6:127835770-127835796:+	TACTTTGCAGTCTGTGTTCTCCTTTA	chr11:103434440-103434480:-	CACTTTGCAATCTGTGTGTGCCTGAATTCTTTAAACAAGA	48	1	77	1
6-qF3-28913.1	Murine-specific	11-qE1-9443.1	Murine-specific	chr6:127835770-127835797:+	TACTTTGCAGTCTGTGTTCTCCTTTAT	chr11:103434440-103434480:-	CACTTTGCAATCTGTGTGTGCCTGAATTCTTTAAACAAGA	56	1	77	1
6-qF3-28913.1	Murine-specific	11-qE1-9443.1	Murine-specific	chr6:127835770-127835798:+	TACTTTGCAGTCTGTGTTCTCCTTTATT	chr11:103434440-103434480:-	CACTTTGCAATCTGTGTGTGCCTGAATTCTTTAAACAAGA	202	1	77	1
6-qF3-28913.1	Murine-specific	11-qE1-9443.1	Murine-specific	chr6:127835770-127835799:+	TACTTTGCAGTCTGTGTTCTCCTTTATTC	chr11:103434440-103434480:-	CACTTTGCAATCTGTGTGTGCCTGAATTCTTTAAACAAGA	1604	1	77	1
6-qF3-28913.1	Murine-specific	11-qE1-9443.1	Murine-specific	chr6:127835770-127835799:+	TACTTTGCAGTCTGTGTTCTCCTTTATTT	chr11:103434440-103434480:-	CACTTTGCAATCTGTGTGTGCCTGAATTCTTTAAACAAGA	31	1	77	1
6-qF3-28913.1	Murine-specific	11-qE1-9443.1	Murine-specific	chr6:127835770-127835800:+	TACTTTGCAGTCTGTGTTCTCCTTTATTCA	chr11:103434440-103434480:-	CACTTTGCAATCTGTGTGTGCCTGAATTCTTTAAACAAGA	412	1	77	1
6-qF3-28913.1	Murine-specific	11-qE1-9443.1	Murine-specific	chr6:127835770-127835800:+	TACTTTGCAGTCTGTGTTCTCCTTTATTCT	chr11:103434440-103434480:-	CACTTTGCAATCTGTGTGTGCCTGAATTCTTTAAACAAGA	731	1	77	1
6-qF3-28913.1	Murine-specific	11-qE1-9443.1	Murine-specific	chr6:127835770-127835801:+	TACTTTGCAGTCTGTGTTCTCCTTTATTCAA	chr11:103434440-103434480:-	CACTTTGCAATCTGTGTGTGCCTGAATTCTTTAAACAAGA	44	1	77	1
6-qF3-28913.1	Murine-specific	11-qE1-9443.1	Murine-specific	chr6:127835770-127835801:+	TACTTTGCAGTCTGTGTTCTCCTTTATTCAG	chr11:103434440-103434480:-	CACTTTGCAATCTGTGTGTGCCTGAATTCTTTAAACAAGA	60	1	77	1
11-qE1-9443.1	Murine-specific	15-qD1-17920.1	Eutherian	chr11:103436219-103436245:+	TCTGAGGTTGAAGGGTTCGGGCCAGG	chr15:59260553-59260593:+	ACTGAGGTTAAAGGGTGGAGGCATGCAATGTGCCACCTTC	100	1	14	1
15-qD3-14639.1	Murine-specific	7-qD1-16444.1	Eutherian	chr15:74642396-74642420:+	TAGAGAATGGGACAGAGGCCTGGA	chr7:69921136-69921176:-	CAGAGAATGAGGCAGAGGCAGCACAACTGTACAAAGGGCA	124	1	25	1
15-qD3-14639.1	Murine-specific	7-qD1-16444.1	Eutherian	chr15:74642396-74642420:+	TAGAGAATGGGACAGAGGCCTGGG	chr7:69921136-69921176:-	CAGAGAATGAGGCAGAGGCAGCACAACTGTACAAAGGGCA	325	1	25	1
15-qD3-14639.1	Murine-specific	7-qD1-16444.1	Eutherian	chr15:74642396-74642420:+	TAGAGAATGGGACAGAGGCCTGGT	chr7:69921136-69921176:-	CAGAGAATGAGGCAGAGGCAGCACAACTGTACAAAGGGCA	535	1	25	1
15-qD3-14639.1	Murine-specific	7-qD1-16444.1	Eutherian	chr15:74642396-74642421:+	TAGAGAATGGGACAGAGGCCTGGGT	chr7:69921136-69921176:-	CAGAGAATGAGGCAGAGGCAGCACAACTGTACAAAGGGCA	172	1	25	1
15-qD3-14639.1	Murine-specific	7-qD1-16444.1	Eutherian	chr15:74642396-74642421:+	TAGAGAATGGGACAGAGGCCTGGGA	chr7:69921136-69921176:-	CAGAGAATGAGGCAGAGGCAGCACAACTGTACAAAGGGCA	540	1	25	1
15-qD3-14639.1	Murine-specific	7-qD1-16444.1	Eutherian	chr15:74642396-74642422:+	TAGAGAATGGGACAGAGGCCTGGGAG	chr7:69921136-69921176:-	CAGAGAATGAGGCAGAGGCAGCACAACTGTACAAAGGGCA	118	1	25	1
15-qD3-14639.1	Murine-specific	7-qD1-16444.1	Eutherian	chr15:74642396-74642422:+	TAGAGAATGGGACAGAGGCCTGGGAT	chr7:69921136-69921176:-	CAGAGAATGAGGCAGAGGCAGCACAACTGTACAAAGGGCA	80	1	25	1
15-qD3-14639.1	Murine-specific	7-qD1-16444.1	Eutherian	chr15:74642396-74642423:+	TAGAGAATGGGACAGAGGCCTGGGAGA	chr7:69921136-69921176:-	CAGAGAATGAGGCAGAGGCAGCACAACTGTACAAAGGGCA	146	1	25	1
15-qD3-14639.1	Murine-specific	7-qD1-16444.1	Eutherian	chr15:74642396-74642423:+	TAGAGAATGGGACAGAGGCCTGGGAGT	chr7:69921136-69921176:-	CAGAGAATGAGGCAGAGGCAGCACAACTGTACAAAGGGCA	78	1	25	1
15-qD3-14639.1	Murine-specific	7-qD1-16444.1	Eutherian	chr15:74642396-74642425:+	TAGAGAATGGGACAGAGGCCTGGGAGAGT	chr7:69921136-69921176:-	CAGAGAATGAGGCAGAGGCAGCACAACTGTACAAAGGGCA	58	1	25	1
10-qB5.1-221.1	Mouse-specific	15-qD1-17920.1	Eutherian	chr10:66700836-66700865:+	TGGGAATTGAACTCAGAACCTTCAGAAGA	chr15:59267991-59268031:+	TGGGAATCGAACTCAGGCCCCTGGAAGAGTGCTCCTAACC	227	7	127	1
10-qB5.1-221.1	Mouse-specific	15-qD1-17920.1	Eutherian	chr10:66700836-66700866:+	TGGGAATTGAACTCAGAACCTTCAGAAGAG	chr15:59267991-59268031:+	TGGGAATCGAACTCAGGCCCCTGGAAGAGTGCTCCTAACC	542	7	127	1
10-qB5.1-221.1	Mouse-specific	15-qD1-17920.1	Eutherian	chr10:66700836-66700867:+	TGGGAATTGAACTCAGAACCTTCAGAAGAGT	chr15:59267991-59268031:+	TGGGAATCGAACTCAGGCCCCTGGAAGAGTGCTCCTAACC	303	1	127	1
18-qE1-1295.1	Mouse-specific	15-qD1-17920.1	Eutherian	chr18:67067750-67067775:+	TGGGAATCGAACCCAGGTCTCTGGA	chr15:59267991-59268031:+	TGGGAATCGAACTCAGGCCCCTGGAAGAGTGCTCCTAACC	92	1	127	1
18-qE1-1295.1	Mouse-specific	15-qD1-17920.1	Eutherian	chr18:67067750-67067776:+	TGGGAATCGAACCCAGGTCTCTGGAA	chr15:59267991-59268031:+	TGGGAATCGAACTCAGGCCCCTGGAAGAGTGCTCCTAACC	63	1	127	1
18-qE1-1295.1	Mouse-specific	15-qD1-17920.1	Eutherian	chr18:67067750-67067777:+	TGGGAATCGAACCCAGGTCTCTGGAAG	chr15:59267991-59268031:+	TGGGAATCGAACTCAGGCCCCTGGAAGAGTGCTCCTAACC	132	1	127	1
18-qE1-1295.1	Mouse-specific	15-qD1-17920.1	Eutherian	chr18:67067750-67067778:+	TGGGAATCGAACCCAGGTCTCTGGAAGT	chr15:59267991-59268031:+	TGGGAATCGAACTCAGGCCCCTGGAAGAGTGCTCCTAACC	40	1	127	1
18-qE1-1295.1	Mouse-specific	15-qD1-17920.1	Eutherian	chr18:67067750-67067778:+	TGGGAATCGAACCCAGGTCTCTGGAAGA	chr15:59267991-59268031:+	TGGGAATCGAACTCAGGCCCCTGGAAGAGTGCTCCTAACC	86	1	127	1
18-qE1-1295.1	Mouse-specific	15-qD1-17920.1	Eutherian	chr18:67067750-67067780:+	TGGGAATCGAACCCAGGTCTCTGGAAGAGC	chr15:59267991-59268031:+	TGGGAATCGAACTCAGGCCCCTGGAAGAGTGCTCCTAACC	102	1	127	1
7-qD2-24830.1	Eutherian	4-qB3-277.1	Murine-specific	chr7:73805843-73805873:-	TTCATTTTGAGCTTCATGTGGTCTGTGACT	chr4:62236494-62236534:-	TTCATTTTGAGTTTCAGTTGGTGTCCCTCAAAATTCATAT	51	1	16	1
2-qE1-35981.1	Eutherian	9-qC-31469.1	Murine-specific	chr2:92546225-92546251:+	CATTTTCTAAAGCAGTGCACCGAGTT	chr9:67719968-67720008:+	CATTTTCTAAAGCACTGCAAAGTGTTAGGAAAAGGATGCT	43	1	74	1
7-qD2-24830.1	Eutherian	15-qD1-17920.1	Eutherian	chr7:73813145-73813171:-	TGAGCACAGGGTACTCACAGCAGTTC	chr15:59258814-59258854:+	AGAGCACAGAGTAGGCACAGAGTCAGGGAACAAAGCTGAC	37	1	45	1
13-qA5-464.1	Mouse-specific	19-qC2-1361.1	Murine-specific	chr13:50514238-50514268:-	TTGTGATGTAAATTTTCCAGGATCATGGCT	chr19:37256281-37256321:+	CTGTGATGTAAAGTCCCCAGAAGAAAACAAAACAAAGCCC	90	2	13	1
13-qA5-703.1	Mouse-specific	19-qC2-1361.1	Murine-specific	chr13:50910116-50910146:-	TTGTGATGTAAATTTTCCAGGATCATGGCT	chr19:37256281-37256321:+	CTGTGATGTAAAGTCCCCAGAAGAAAACAAAACAAAGCCC	90	2	13	1
15-qE1-8387.1	Eutherian	12-qE-23911.1	Eutherian	chr15:78656199-78656226:-	TTGTTCCAAACCTCTGAAGCCTCATGA	chr12:98416701-98416741:+	TTGTTCCAAATCACTGAAGTCCCAAACCAAAAGGAGATGG	49	1	47	1
6-qF3-28913.1	Murine-specific	14-qA3-2286.1	Mouse-specific	chr6:127797163-127797187:+	TACTCCTGTGTCCCACTCTGCTAC	chr14:24369763-24369803:+	AACTCCTGTATCTAACTCTCCTACTGTCTCGCTCAGTTTC	31	1	48	1
6-qF3-28913.1	Murine-specific	14-qA3-2286.1	Mouse-specific	chr6:127797163-127797188:+	TACTCCTGTGTCCCACTCTGCTACT	chr14:24369763-24369803:+	AACTCCTGTATCTAACTCTCCTACTGTCTCGCTCAGTTTC	102	1	48	1
6-qF3-28913.1	Murine-specific	14-qA3-2286.1	Mouse-specific	chr6:127797163-127797190:+	TACTCCTGTGTCCCACTCTGCTACTCT	chr14:24369763-24369803:+	AACTCCTGTATCTAACTCTCCTACTGTCTCGCTCAGTTTC	135	1	48	1
6-qF3-28913.1	Murine-specific	14-qA3-2286.1	Mouse-specific	chr6:127797163-127797191:+	TACTCCTGTGTCCCACTCTGCTACTCTC	chr14:24369763-24369803:+	AACTCCTGTATCTAACTCTCCTACTGTCTCGCTCAGTTTC	76	1	48	1
6-qF3-28913.1	Murine-specific	14-qA3-2286.1	Mouse-specific	chr6:127797163-127797192:+	TACTCCTGTGTCCCACTCTGCTACTCTCT	chr14:24369763-24369803:+	AACTCCTGTATCTAACTCTCCTACTGTCTCGCTCAGTTTC	307	1	48	1
6-qF3-28913.1	Murine-specific	14-qA3-2286.1	Mouse-specific	chr6:127797163-127797193:+	TACTCCTGTGTCCCACTCTGCTACTCTCTC	chr14:24369763-24369803:+	AACTCCTGTATCTAACTCTCCTACTGTCTCGCTCAGTTTC	162	1	48	1
6-qF3-28913.1	Murine-specific	14-qA3-2286.1	Mouse-specific	chr6:127797163-127797193:+	TACTCCTGTGTCCCACTCTGCTACTCTCTT	chr14:24369763-24369803:+	AACTCCTGTATCTAACTCTCCTACTGTCTCGCTCAGTTTC	69	1	48	1
6-qF3-28913.1	Murine-specific	14-qA3-2286.1	Mouse-specific	chr6:127797163-127797194:+	TACTCCTGTGTCCCACTCTGCTACTCTCTCT	chr14:24369763-24369803:+	AACTCCTGTATCTAACTCTCCTACTGTCTCGCTCAGTTTC	178	1	48	1
6-qF3-28913.1	Murine-specific	14-qA3-2286.1	Mouse-specific	chr6:127797163-127797194:+	TACTCCTGTGTCCCACTCTGCTACTCTCTCC	chr14:24369763-24369803:+	AACTCCTGTATCTAACTCTCCTACTGTCTCGCTCAGTTTC	189	1	48	1
9-qC-10667.1	Eutherian	17-qA3.3-27363.1	Eutherian	chr9:67738627-67738657:+	TAGAAGTTTTCTCTGAACATGAGCACAGTA	chr17:27311808-27311848:+	GAGAAGTTTCCTCTCAACAGTTGCACCAACCAATGGCTTT	235	1	13	1
15-qD1-4001.1	Murine-specific	10-qB4-6488.1	Murine-specific	chr15:59295936-59295963:+	CAGAAGTTCTAGGTCATTCTCCACTCT	chr10:62656889-62656929:-	TAGAAGTTCAAGGTCACCCTTGGCTGTGCCAAGTTTGAGG	52	1	13	1
7-qD1-19431.1	Eutherian	10-qB4-6488.1	Murine-specific	chr7:73113629-73113654:+	CAGAAGTTCAAGGTCATTCTCTGCC	chr10:62656889-62656929:-	TAGAAGTTCAAGGTCACCCTTGGCTGTGCCAAGTTTGAGG	171	1	13	1
7-qD1-19431.1	Eutherian	10-qB4-6488.1	Murine-specific	chr7:73113629-73113655:+	CAGAAGTTCAAGGTCATTCTCTGCCA	chr10:62656889-62656929:-	TAGAAGTTCAAGGTCACCCTTGGCTGTGCCAAGTTTGAGG	408	1	13	1
7-qD1-19431.1	Eutherian	10-qB4-6488.1	Murine-specific	chr7:73113629-73113656:+	CAGAAGTTCAAGGTCATTCTCTGCCAC	chr10:62656889-62656929:-	TAGAAGTTCAAGGTCACCCTTGGCTGTGCCAAGTTTGAGG	120	1	13	1
7-qD1-19431.1	Eutherian	10-qB4-6488.1	Murine-specific	chr7:73113629-73113656:+	CAGAAGTTCAAGGTCATTCTCTGCCAT	chr10:62656889-62656929:-	TAGAAGTTCAAGGTCACCCTTGGCTGTGCCAAGTTTGAGG	76	1	13	1
7-qD1-19431.1	Eutherian	10-qB4-6488.1	Murine-specific	chr7:73113629-73113657:+	CAGAAGTTCAAGGTCATTCTCTGCCACT	chr10:62656889-62656929:-	TAGAAGTTCAAGGTCACCCTTGGCTGTGCCAAGTTTGAGG	326	2	13	1
7-qD1-19431.1	Eutherian	10-qB4-6488.1	Murine-specific	chr7:73113629-73113657:+	CAGAAGTTCAAGGTCATTCTCTGCCACA	chr10:62656889-62656929:-	TAGAAGTTCAAGGTCACCCTTGGCTGTGCCAAGTTTGAGG	67	1	13	1
7-qD1-19431.1	Eutherian	10-qB4-6488.1	Murine-specific	chr7:73113629-73113658:+	CAGAAGTTCAAGGTCATTCTCTGCCACAT	chr10:62656889-62656929:-	TAGAAGTTCAAGGTCACCCTTGGCTGTGCCAAGTTTGAGG	263	1	13	1
7-qD1-19431.1	Eutherian	10-qB4-6488.1	Murine-specific	chr7:73113629-73113659:+	CAGAAGTTCAAGGTCATTCTCTGCCACATA	chr10:62656889-62656929:-	TAGAAGTTCAAGGTCACCCTTGGCTGTGCCAAGTTTGAGG	97	1	13	1
10-qC1-12816.1	Murine-specific	2-qE1-35981.1	Eutherian	chr10:75838986-75839012:+	TTCCTCATGTGTGACTTGGGGTGGGC	chr2:92559678-92559718:-	TTCCTCATGTGTAAAATGGGGACAGGCCCTCTAATTCACA	102	1	190	1
10-qC1-12816.1	Murine-specific	2-qE1-35981.1	Eutherian	chr10:75838986-75839014:+	TTCCTCATGTGTGACTTGGGGTGGGCAG	chr2:92559678-92559718:-	TTCCTCATGTGTAAAATGGGGACAGGCCCTCTAATTCACA	50	1	190	1
9-qC-10667.1	Eutherian	2-qE1-35981.1	Eutherian	chr9:67738291-67738321:+	TTCCTCATGGGTAAAATTGGGATATCAAGA	chr2:92559678-92559718:-	TTCCTCATGTGTAAAATGGGGACAGGCCCTCTAATTCACA	98	1	190	1
9-qC-10667.1	Eutherian	2-qE1-35981.1	Eutherian	chr9:67738291-67738322:+	TTCCTCATGGGTAAAATTGGGATATCAAGAC	chr2:92559678-92559718:-	TTCCTCATGTGTAAAATGGGGACAGGCCCTCTAATTCACA	167	1	190	1
9-qC-10667.1	Eutherian	2-qE1-35981.1	Eutherian	chr9:67738291-67738323:+	TTCCTCATGGGTAAAATTGGGATATCAAGACT	chr2:92559678-92559718:-	TTCCTCATGTGTAAAATGGGGACAGGCCCTCTAATTCACA	65	1	190	1
10-qB4-6488.1	Murine-specific	10-qB4-6488.1	Murine-specific	chr10:62654708-62654737:+	TGGGATTAAATTTGTGTGCCACCATGCCT	chr10:62658713-62658753:-	TGGGATTAAAGGCGTGCGCCACCACTGCCCGGCCCAAGCA	39	1	43	1
10-qB4-6488.1	Murine-specific	10-qB4-6488.1	Murine-specific	chr10:62703613-62703642:+	TGGGATTAAAGGAATGGACCACCATCGCC	chr10:62658713-62658753:-	TGGGATTAAAGGCGTGCGCCACCACTGCCCGGCCCAAGCA	33	1	43	1
10-qC1-12816.1	Murine-specific	10-qB4-6488.1	Murine-specific	chr10:75858472-75858497:+	TGGGATTAAGGGCATGGGCCAGCCT	chr10:62658713-62658753:-	TGGGATTAAAGGCGTGCGCCACCACTGCCCGGCCCAAGCA	41	1	43	1
10-qC1-12816.1	Murine-specific	10-qB4-6488.1	Murine-specific	chr10:75858472-75858499:+	TGGGATTAAGGGCATGGGCCAGCCACC	chr10:62658713-62658753:-	TGGGATTAAAGGCGTGCGCCACCACTGCCCGGCCCAAGCA	297	1	43	1
10-qC1-12816.1	Murine-specific	10-qB4-6488.1	Murine-specific	chr10:75858472-75858500:+	TGGGATTAAGGGCATGGGCCAGCCACCA	chr10:62658713-62658753:-	TGGGATTAAAGGCGTGCGCCACCACTGCCCGGCCCAAGCA	31	1	43	1
10-qC1-12816.1	Murine-specific	10-qB4-6488.1	Murine-specific	chr10:75858472-75858502:+	TGGGATTAAGGGCATGGGCCAGCCACCACT	chr10:62658713-62658753:-	TGGGATTAAAGGCGTGCGCCACCACTGCCCGGCCCAAGCA	175	1	43	1
10-qC1-12816.1	Murine-specific	10-qB4-6488.1	Murine-specific	chr10:75858472-75858504:+	TGGGATTAAGGGCATGGGCCAGCCACCACAGC	chr10:62658713-62658753:-	TGGGATTAAAGGCGTGCGCCACCACTGCCCGGCCCAAGCA	48	1	43	1
14-qA3-19970.1	Murine-specific	10-qB4-6488.1	Murine-specific	chr14:24120783-24120814:+	TGGGATTAAAGGCATGTGCCACAATGCCAGG	chr10:62658713-62658753:-	TGGGATTAAAGGCGTGCGCCACCACTGCCCGGCCCAAGCA	81	1	43	1
14-qC1-1261.1	Mouse-specific	10-qB4-6488.1	Murine-specific	chr14:44774858-44774890:-	TGGGATTAAACGCATGAACCACCATGCATGGA	chr10:62658713-62658753:-	TGGGATTAAAGGCGTGCGCCACCACTGCCCGGCCCAAGCA	34	1	43	1
14-qC1-1261.1	Mouse-specific	10-qB4-6488.1	Murine-specific	chr14:44774861-44774890:-	TGGGATTAAACGCATGAACCACCATGCAT	chr10:62658713-62658753:-	TGGGATTAAAGGCGTGCGCCACCACTGCCCGGCCCAAGCA	45	1	43	1
15-qD3-14639.1	Murine-specific	10-qB4-6488.1	Murine-specific	chr15:74649399-74649428:+	TGGGATTAAAGGTGTGTGACACAGTGCCT	chr10:62658713-62658753:-	TGGGATTAAAGGCGTGCGCCACCACTGCCCGGCCCAAGCA	147	1	43	1
2-qE1-35981.1	Eutherian	10-qB4-6488.1	Murine-specific	chr2:92568314-92568344:+	TGGGATTAAAGGCGTGTGCCATCACTATCC	chr10:62658713-62658753:-	TGGGATTAAAGGCGTGCGCCACCACTGCCCGGCCCAAGCA	72	1	43	1
4-qD2.2-2182.1	Murine-specific	10-qB4-6488.1	Murine-specific	chr4:123835196-123835225:-	TGGGATTAAAGGTGTACACCACCACGTCT	chr10:62658713-62658753:-	TGGGATTAAAGGCGTGCGCCACCACTGCCCGGCCCAAGCA	64	1	43	1
4-qD2.2-2182.1	Murine-specific	10-qB4-6488.1	Murine-specific	chr4:123835197-123835225:-	TGGGATTAAAGGTGTACACCACCACGTC	chr10:62658713-62658753:-	TGGGATTAAAGGCGTGCGCCACCACTGCCCGGCCCAAGCA	119	1	43	1
6-qC3-6258.1	Murine-specific	10-qB4-6488.1	Murine-specific	chr6:81898600-81898631:-	TGGGATTACAGGTGTGCACAACTTTCCTGCT	chr10:62658713-62658753:-	TGGGATTAAAGGCGTGCGCCACCACTGCCCGGCCCAAGCA	126	1	43	1
6-qC3-6258.1	Murine-specific	10-qB4-6488.1	Murine-specific	chr6:81898601-81898631:-	TGGGATTACAGGTGTGCACAACTTTCCTGC	chr10:62658713-62658753:-	TGGGATTAAAGGCGTGCGCCACCACTGCCCGGCCCAAGCA	36	1	43	1
6-qC3-6258.1	Murine-specific	10-qB4-6488.1	Murine-specific	chr6:81898603-81898631:-	TGGGATTACAGGTGTGCACAACTTTCCT	chr10:62658713-62658753:-	TGGGATTAAAGGCGTGCGCCACCACTGCCCGGCCCAAGCA	108	1	43	1
6-qC3-6258.1	Murine-specific	10-qB4-6488.1	Murine-specific	chr6:81898606-81898631:-	TGGGATTACAGGTGTGCACAACTTT	chr10:62658713-62658753:-	TGGGATTAAAGGCGTGCGCCACCACTGCCCGGCCCAAGCA	46	1	43	1
6-qD1-2831.1	Murine-specific	10-qB4-6488.1	Murine-specific	chr6:87985595-87985625:-	TGGGATTAAAGGCATGCGCAACCACGCCTG	chr10:62658713-62658753:-	TGGGATTAAAGGCGTGCGCCACCACTGCCCGGCCCAAGCA	54	1	43	1
6-qD1-2831.1	Murine-specific	10-qB4-6488.1	Murine-specific	chr6:87985596-87985625:-	TGGGATTAAAGGCATGCGCAACCACGCCT	chr10:62658713-62658753:-	TGGGATTAAAGGCGTGCGCCACCACTGCCCGGCCCAAGCA	34	1	43	1
9-qC-31469.1	Murine-specific	10-qB4-6488.1	Murine-specific	chr9:67694516-67694547:-	TGGGATTAAAGGTGTGTATCAAAAAGCCAGT	chr10:62658713-62658753:-	TGGGATTAAAGGCGTGCGCCACCACTGCCCGGCCCAAGCA	47	1	43	1
9-qC-31469.1	Murine-specific	10-qB4-6488.1	Murine-specific	chr9:67694516-67694547:-	TGGGATTAAAGGTGTGTATCAAAAAGCCAGC	chr10:62658713-62658753:-	TGGGATTAAAGGCGTGCGCCACCACTGCCCGGCCCAAGCA	89	1	43	1
9-qC-31469.1	Murine-specific	10-qB4-6488.1	Murine-specific	chr9:67694517-67694547:-	TGGGATTAAAGGTGTGTATCAAAAAGCCAG	chr10:62658713-62658753:-	TGGGATTAAAGGCGTGCGCCACCACTGCCCGGCCCAAGCA	61	1	43	1
9-qC-31469.1	Murine-specific	10-qB4-6488.1	Murine-specific	chr9:67694518-67694547:-	TGGGATTAAAGGTGTGTATCAAAAAGCCA	chr10:62658713-62658753:-	TGGGATTAAAGGCGTGCGCCACCACTGCCCGGCCCAAGCA	203	1	43	1
9-qC-31469.1	Murine-specific	10-qB4-6488.1	Murine-specific	chr9:67694519-67694547:-	TGGGATTAAAGGTGTGTATCAAAAAGCC	chr10:62658713-62658753:-	TGGGATTAAAGGCGTGCGCCACCACTGCCCGGCCCAAGCA	136	1	43	1
15-qE1-1119.1	Mouse-specific	14-qA3-3095.1	Mouse-specific	chr15:79928981-79929007:+	TCTCTTAGCCTCTGTTCCAAGCCAGT	chr14:19646793-19646833:+	TCTCTTAGTCTCTGTTCCCAGCTATGCGAAGCTTTTGCTT	36	1	19	1
15-qE1-1119.1	Mouse-specific	14-qA3-3095.1	Mouse-specific	chr15:79928981-79929009:+	TCTCTTAGCCTCTGTTCCAAGCCAGTTT	chr14:19646793-19646833:+	TCTCTTAGTCTCTGTTCCCAGCTATGCGAAGCTTTTGCTT	79	1	19	1
15-qE1-1119.1	Mouse-specific	14-qA3-3095.1	Mouse-specific	chr15:79928981-79929010:+	TCTCTTAGCCTCTGTTCCAAGCCAGTTTC	chr14:19646793-19646833:+	TCTCTTAGTCTCTGTTCCCAGCTATGCGAAGCTTTTGCTT	61	1	19	1
15-qE1-1119.1	Mouse-specific	14-qA3-3095.1	Mouse-specific	chr15:79928981-79929011:+	TCTCTTAGCCTCTGTTCCAAGCCAGTTTCT	chr14:19646793-19646833:+	TCTCTTAGTCTCTGTTCCCAGCTATGCGAAGCTTTTGCTT	160	1	19	1
15-qE1-1119.1	Mouse-specific	14-qA3-3095.1	Mouse-specific	chr15:79928981-79929011:+	TCTCTTAGCCTCTGTTCCAAGCCAGTTTCC	chr14:19646793-19646833:+	TCTCTTAGTCTCTGTTCCCAGCTATGCGAAGCTTTTGCTT	43	1	19	1
7-qD1-19431.1	Eutherian	6-qD1-2831.1	Murine-specific	chr7:73137717-73137744:+	TGCTTTGACAAGTAAAATGGGCACCTC	chr6:87989485-87989525:+	TGCTTTGACATGTGAACTGGGCTCACAGGATAGAGAGGCG	59	1	18	1
7-qD1-19431.1	Eutherian	6-qD1-2831.1	Murine-specific	chr7:73137717-73137746:+	TGCTTTGACAAGTAAAATGGGCACCTCAG	chr6:87989485-87989525:+	TGCTTTGACATGTGAACTGGGCTCACAGGATAGAGAGGCG	63	1	18	1
7-qD1-19431.1	Eutherian	6-qD1-2831.1	Murine-specific	chr7:73137717-73137747:+	TGCTTTGACAAGTAAAATGGGCACCTCAGT	chr6:87989485-87989525:+	TGCTTTGACATGTGAACTGGGCTCACAGGATAGAGAGGCG	76	1	18	1
17-qA3.3-26735.1	Eutherian	6-qF3-8009.1	Eutherian	chr17:27348363-27348390:+	TTGTTCCCGTATGCTAGAGAACAGGAC	chr6:127776427-127776467:+	GTGTTCCCAAATGCTGGACAACAGGTTTTGATCTTTCCAA	94	1	26	1
17-qA3.3-26735.1	Eutherian	6-qF3-8009.1	Eutherian	chr17:27348363-27348391:+	TTGTTCCCGTATGCTAGAGAACAGGACT	chr6:127776427-127776467:+	GTGTTCCCAAATGCTGGACAACAGGTTTTGATCTTTCCAA	154	1	26	1
17-qA3.3-26735.1	Eutherian	6-qF3-8009.1	Eutherian	chr17:27348363-27348391:+	TTGTTCCCGTATGCTAGAGAACAGGACA	chr6:127776427-127776467:+	GTGTTCCCAAATGCTGGACAACAGGTTTTGATCTTTCCAA	198	1	26	1
17-qA3.3-26735.1	Eutherian	6-qF3-8009.1	Eutherian	chr17:27348363-27348393:+	TTGTTCCCGTATGCTAGAGAACAGGACACT	chr6:127776427-127776467:+	GTGTTCCCAAATGCTGGACAACAGGTTTTGATCTTTCCAA	51	1	26	1
10-qC1-875.1	Murine-specific	9-qC-31469.1	Murine-specific	chr10:86618910-86618940:+	TTCATTCATTCACTCACTCATTCATTCTCT	chr9:67728534-67728574:+	TTCATTCATTCATTCATTCATACATTCATACATTAATTCA	93	1	66	1
10-qC1-875.1	Murine-specific	9-qC-31469.1	Murine-specific	chr10:86618910-86618941:+	TTCATTCATTCACTCACTCATTCATTCTCTC	chr9:67728534-67728574:+	TTCATTCATTCATTCATTCATACATTCATACATTAATTCA	65	1	66	1
10-qC1-875.1	Murine-specific	9-qC-31469.1	Murine-specific	chr10:86618910-86618942:+	TTCATTCATTCACTCACTCATTCATTCTCTCC	chr9:67728534-67728574:+	TTCATTCATTCATTCATTCATACATTCATACATTAATTCA	129	1	66	1
10-qC1-875.1	Murine-specific	9-qC-31469.1	Murine-specific	chr10:86618914-86618943:+	TTCATTCACTCACTCATTCATTCTCTCCC	chr9:67728534-67728574:+	TTCATTCATTCATTCATTCATACATTCATACATTAATTCA	33	1	66	1
10-qC1-875.1	Murine-specific	9-qC-31469.1	Murine-specific	chr10:86618914-86618944:+	TTCATTCACTCACTCATTCATTCTCTCCCT	chr9:67728534-67728574:+	TTCATTCATTCATTCATTCATACATTCATACATTAATTCA	561	1	66	1
10-qC1-875.1	Murine-specific	9-qC-31469.1	Murine-specific	chr10:86618914-86618945:+	TTCATTCACTCACTCATTCATTCTCTCCCTC	chr9:67728534-67728574:+	TTCATTCATTCATTCATTCATACATTCATACATTAATTCA	50	1	66	1
17-qE1.1-7037.1	Mouse-specific	9-qC-31469.1	Murine-specific	chr17:66208699-66208729:+	TTCATTCATTCATTCATCCATACATTCTCT	chr9:67728534-67728574:+	TTCATTCATTCATTCATTCATACATTCATACATTAATTCA	35	1	66	1
17-qE1.1-7037.1	Mouse-specific	9-qC-31469.1	Murine-specific	chr17:66208703-66208733:+	TTCATTCATTCATCCATACATTCTCTCTCT	chr9:67728534-67728574:+	TTCATTCATTCATTCATTCATACATTCATACATTAATTCA	295	2	66	1
17-qE1.1-7037.1	Mouse-specific	9-qC-31469.1	Murine-specific	chr17:66208703-66208734:+	TTCATTCATTCATCCATACATTCTCTCTCTC	chr9:67728534-67728574:+	TTCATTCATTCATTCATTCATACATTCATACATTAATTCA	91	2	66	1
17-qE1.1-7037.1	Mouse-specific	9-qC-31469.1	Murine-specific	chr17:66208703-66208735:+	TTCATTCATTCATCCATACATTCTCTCTCTCT	chr9:67728534-67728574:+	TTCATTCATTCATTCATTCATACATTCATACATTAATTCA	91	2	66	1
17-qE1.1-7037.1	Mouse-specific	9-qC-31469.1	Murine-specific	chr17:66208707-66208735:+	TTCATTCATCCATACATTCTCTCTCTCT	chr9:67728534-67728574:+	TTCATTCATTCATTCATTCATACATTCATACATTAATTCA	95	2	66	1
17-qE1.1-7037.1	Mouse-specific	9-qC-31469.1	Murine-specific	chr17:66208707-66208736:+	TTCATTCATCCATACATTCTCTCTCTCTC	chr9:67728534-67728574:+	TTCATTCATTCATTCATTCATACATTCATACATTAATTCA	71	2	66	1
17-qE1.1-7037.1	Mouse-specific	9-qC-31469.1	Murine-specific	chr17:66208707-66208737:+	TTCATTCATCCATACATTCTCTCTCTCTCC	chr9:67728534-67728574:+	TTCATTCATTCATTCATTCATACATTCATACATTAATTCA	942	1	66	1
17-qE1.1-7037.1	Mouse-specific	9-qC-31469.1	Murine-specific	chr17:66208707-66208738:+	TTCATTCATCCATACATTCTCTCTCTCTCCT	chr9:67728534-67728574:+	TTCATTCATTCATTCATTCATACATTCATACATTAATTCA	127	1	66	1
17-qE1.1-7037.1	Mouse-specific	9-qC-31469.1	Murine-specific	chr17:66208707-66208738:+	TTCATTCATCCATACATTCTCTCTCTCTCCC	chr9:67728534-67728574:+	TTCATTCATTCATTCATTCATACATTCATACATTAATTCA	81	1	66	1
17-qE1.1-7037.1	Mouse-specific	9-qC-31469.1	Murine-specific	chr17:66208707-66208739:+	TTCATTCATCCATACATTCTCTCTCTCTCCCT	chr9:67728534-67728574:+	TTCATTCATTCATTCATTCATACATTCATACATTAATTCA	31	1	66	1
17-qE1.1-7037.1	Mouse-specific	9-qC-31469.1	Murine-specific	chr17:66208707-66208739:+	TTCATTCATCCATACATTCTCTCTCTCTCCCC	chr9:67728534-67728574:+	TTCATTCATTCATTCATTCATACATTCATACATTAATTCA	41	1	66	1
7-qD1-654.1	Murine-specific	9-qC-31469.1	Murine-specific	chr7:73104560-73104590:-	TTCATTCATTCTTTCTTTCGTTCATTCGTT	chr9:67728534-67728574:+	TTCATTCATTCATTCATTCATACATTCATACATTAATTCA	266	1	66	1
7-qD1-654.1	Murine-specific	9-qC-31469.1	Murine-specific	chr7:73104561-73104590:-	TTCATTCATTCTTTCTTTCGTTCATTCGT	chr9:67728534-67728574:+	TTCATTCATTCATTCATTCATACATTCATACATTAATTCA	93	1	66	1
9-qC-31469.1	Murine-specific	4-qD2.2-2182.1	Murine-specific	chr9:67708604-67708635:-	TAAAATGGTTCTCAAGCTTCCTTCTGACTTG	chr4:123835046-123835086:+	TAAAATGGTCCTCAAGCTTCCTTCTGAATTCATCTGAACA	1256	1	13	1
9-qC-31469.1	Murine-specific	4-qD2.2-2182.1	Murine-specific	chr9:67708604-67708635:-	TAAAATGGTTCTCAAGCTTCCTTCTGACTTT	chr4:123835046-123835086:+	TAAAATGGTCCTCAAGCTTCCTTCTGAATTCATCTGAACA	96	1	13	1
9-qC-31469.1	Murine-specific	4-qD2.2-2182.1	Murine-specific	chr9:67708605-67708635:-	TAAAATGGTTCTCAAGCTTCCTTCTGACTT	chr4:123835046-123835086:+	TAAAATGGTCCTCAAGCTTCCTTCTGAATTCATCTGAACA	1366	1	13	1
9-qC-31469.1	Murine-specific	4-qD2.2-2182.1	Murine-specific	chr9:67708606-67708635:-	TAAAATGGTTCTCAAGCTTCCTTCTGACT	chr4:123835046-123835086:+	TAAAATGGTCCTCAAGCTTCCTTCTGAATTCATCTGAACA	1248	1	13	1
9-qC-31469.1	Murine-specific	4-qD2.2-2182.1	Murine-specific	chr9:67708607-67708635:-	TAAAATGGTTCTCAAGCTTCCTTCTGAC	chr4:123835046-123835086:+	TAAAATGGTCCTCAAGCTTCCTTCTGAATTCATCTGAACA	98	1	13	1
4-qB3-3994.1	Murine-specific	1-qC1.3-637.1	Mouse-specific	chr4:57360402-57360434:-	TTGTAGGTTTGTCCCCTCAATGTCAGACAGGT	chr1:57352415-57352455:+	ATGTAGGCTTCTCCACTCAATGAGAGGATTTCAAAAGACG	64	1	17	1
4-qB3-3994.1	Murine-specific	1-qC1.3-637.1	Mouse-specific	chr4:57360403-57360434:-	TTGTAGGTTTGTCCCCTCAATGTCAGACAGG	chr1:57352415-57352455:+	ATGTAGGCTTCTCCACTCAATGAGAGGATTTCAAAAGACG	45	1	17	1
4-qB3-3994.1	Murine-specific	1-qC1.3-637.1	Mouse-specific	chr4:57360403-57360434:-	TTGTAGGTTTGTCCCCTCAATGTCAGACAGT	chr1:57352415-57352455:+	ATGTAGGCTTCTCCACTCAATGAGAGGATTTCAAAAGACG	67	1	17	1
11-qE1-9443.1	Murine-specific	10-qC1-875.1	Murine-specific	chr11:103441805-103441834:+	TAAGAAAGCAGGCCTAGCAAGCCATGGGG	chr10:86631218-86631258:-	TAAGAAAGCAGGCTGAGCAAGACGGGGGAAACAAGCCAGT	44	1	16	1
11-qE1-9443.1	Murine-specific	10-qC1-875.1	Murine-specific	chr11:103441805-103441836:+	TAAGAAAGCAGGCCTAGCAAGCCATGGGGAG	chr10:86631218-86631258:-	TAAGAAAGCAGGCTGAGCAAGACGGGGGAAACAAGCCAGT	44	1	16	1
15-qD1-4001.1	Murine-specific	10-qC1-875.1	Murine-specific	chr15:59286561-59286590:+	TAAGAAAGCAAGCTGAGCAAGCCACAAGA	chr10:86631218-86631258:-	TAAGAAAGCAGGCTGAGCAAGACGGGGGAAACAAGCCAGT	203	3	16	1
15-qD1-4001.1	Murine-specific	10-qC1-875.1	Murine-specific	chr15:59286561-59286591:+	TAAGAAAGCAAGCTGAGCAAGCCACAAGAA	chr10:86631218-86631258:-	TAAGAAAGCAGGCTGAGCAAGACGGGGGAAACAAGCCAGT	104	2	16	1
17-qE1.1-7037.1	Mouse-specific	10-qC1-875.1	Murine-specific	chr17:66224415-66224439:+	TAAGAAAGTAGGCTAAGCAGGATG	chr10:86631218-86631258:-	TAAGAAAGCAGGCTGAGCAAGACGGGGGAAACAAGCCAGT	32	1	16	1
17-qE1.1-7037.1	Mouse-specific	10-qC1-875.1	Murine-specific	chr17:66224415-66224440:+	TAAGAAAGTAGGCTAAGCAGGATGG	chr10:86631218-86631258:-	TAAGAAAGCAGGCTGAGCAAGACGGGGGAAACAAGCCAGT	82	1	16	1
17-qE1.1-7037.1	Mouse-specific	10-qC1-875.1	Murine-specific	chr17:66224415-66224443:+	TAAGAAAGTAGGCTAAGCAGGATGGGGA	chr10:86631218-86631258:-	TAAGAAAGCAGGCTGAGCAAGACGGGGGAAACAAGCCAGT	79	1	16	1
17-qE1.1-7037.1	Mouse-specific	10-qC1-875.1	Murine-specific	chr17:66224415-66224444:+	TAAGAAAGTAGGCTAAGCAGGATGGGGAA	chr10:86631218-86631258:-	TAAGAAAGCAGGCTGAGCAAGACGGGGGAAACAAGCCAGT	95	1	16	1
17-qE1.1-7037.1	Mouse-specific	10-qC1-875.1	Murine-specific	chr17:66224415-66224445:+	TAAGAAAGTAGGCTAAGCAGGATGGGGAAC	chr10:86631218-86631258:-	TAAGAAAGCAGGCTGAGCAAGACGGGGGAAACAAGCCAGT	33	1	16	1
17-qE1.1-7037.1	Mouse-specific	10-qC1-875.1	Murine-specific	chr17:66224415-66224446:+	TAAGAAAGTAGGCTAAGCAGGATGGGGAACT	chr10:86631218-86631258:-	TAAGAAAGCAGGCTGAGCAAGACGGGGGAAACAAGCCAGT	67	1	16	1
17-qA3.3-26735.1	Eutherian	9-qC-10667.1	Eutherian	chr17:27331468-27331493:+	TGACAGTGTACGATAAACCTAAGGA	chr9:67734430-67734470:-	CGACAGTGTAAGGTAAAACTACAGACCCTTGAAAAGCCTT	33	1	89	1
17-qA3.3-26735.1	Eutherian	9-qC-10667.1	Eutherian	chr17:27331468-27331494:+	TGACAGTGTACGATAAACCTAAGGAC	chr9:67734430-67734470:-	CGACAGTGTAAGGTAAAACTACAGACCCTTGAAAAGCCTT	669	1	89	1
17-qA3.3-26735.1	Eutherian	9-qC-10667.1	Eutherian	chr17:27331468-27331495:+	TGACAGTGTACGATAAACCTAAGGACT	chr9:67734430-67734470:-	CGACAGTGTAAGGTAAAACTACAGACCCTTGAAAAGCCTT	54	1	89	1
17-qA3.3-26735.1	Eutherian	9-qC-10667.1	Eutherian	chr17:27331468-27331495:+	TGACAGTGTACGATAAACCTAAGGACC	chr9:67734430-67734470:-	CGACAGTGTAAGGTAAAACTACAGACCCTTGAAAAGCCTT	6834	1	89	1
17-qA3.3-26735.1	Eutherian	9-qC-10667.1	Eutherian	chr17:27331468-27331496:+	TGACAGTGTACGATAAACCTAAGGACCT	chr9:67734430-67734470:-	CGACAGTGTAAGGTAAAACTACAGACCCTTGAAAAGCCTT	3656	1	89	1
17-qA3.3-26735.1	Eutherian	9-qC-10667.1	Eutherian	chr17:27331468-27331496:+	TGACAGTTTACGATAAACCTAAGGACCT	chr9:67734430-67734470:-	CGACAGTGTAAGGTAAAACTACAGACCCTTGAAAAGCCTT	45	1	89	1
17-qA3.3-26735.1	Eutherian	9-qC-10667.1	Eutherian	chr17:27331468-27331497:+	TGACAGTGTACGATAAACCTAAGGACCTT	chr9:67734430-67734470:-	CGACAGTGTAAGGTAAAACTACAGACCCTTGAAAAGCCTT	45	1	89	1
17-qA3.3-26735.1	Eutherian	9-qC-10667.1	Eutherian	chr17:27331468-27331497:+	TGACAGTGTACGATAAACCTAAGGACCTG	chr9:67734430-67734470:-	CGACAGTGTAAGGTAAAACTACAGACCCTTGAAAAGCCTT	67	1	89	1
17-qA3.3-26735.1	Eutherian	9-qC-10667.1	Eutherian	chr17:27331468-27331500:+	TGACAGTGTACGATAAACCTAAGGACCTGGGA	chr9:67734430-67734470:-	CGACAGTGTAAGGTAAAACTACAGACCCTTGAAAAGCCTT	198	1	89	1
17-qA3.3-26735.1	Eutherian	7-qD2-11976.1	Eutherian	chr17:27327156-27327180:+	TGTTCTAGAAGAACCATGGAAGCC	chr7:73818932-73818972:-	TGTTCTACAAGGAACATGCAACATTTGAAGAGAGATGGAA	45	1	32	1
15-qD3-14639.1	Murine-specific	6-qC3-100.1	Murine-specific	chr15:74657300-74657328:+	TCTGAGTTTGACGCCAGGCTAGTCTTCT	chr6:83586364-83586404:-	TCTGAGTTCGAGGCCAGCCTGGTCTACAGAGTGAGTTCCA	38	1	15	1
15-qD3-14639.1	Murine-specific	6-qC3-100.1	Murine-specific	chr15:74657300-74657330:+	TCTGAGTTTGACGCCAGGCTAGTCTTCTGT	chr6:83586364-83586404:-	TCTGAGTTCGAGGCCAGCCTGGTCTACAGAGTGAGTTCCA	99	1	15	1
9-qC-10667.1	Eutherian	6-qC3-100.1	Murine-specific	chr9:67742127-67742156:+	TCTGAGTTCAAGGACAGCCTGGTCTAAAA	chr6:83586364-83586404:-	TCTGAGTTCGAGGCCAGCCTGGTCTACAGAGTGAGTTCCA	110	3	15	1
7-qD1-9417.1	Murine-specific	7-qD2-11976.1	Eutherian	chr7:69886561-69886593:-	TGGACTTCTGGTCTCCAGTTCTCGAGCCCACT	chr7:73821454-73821494:-	TGGACTTCTGGTCTCCAGAACCAGGAGAGAAGAAGTACTC	173	1	13	1
7-qD1-9417.1	Murine-specific	7-qD2-11976.1	Eutherian	chr7:69886562-69886593:-	TGGACTTCTGGTCTCCAGTTCTCGAGCCCAC	chr7:73821454-73821494:-	TGGACTTCTGGTCTCCAGAACCAGGAGAGAAGAAGTACTC	36	1	13	1
7-qD1-9417.1	Murine-specific	7-qD2-11976.1	Eutherian	chr7:69886563-69886593:-	TGGACTTCTGGTCTCCAGTTCTCGAGCCCA	chr7:73821454-73821494:-	TGGACTTCTGGTCTCCAGAACCAGGAGAGAAGAAGTACTC	60	1	13	1
7-qD1-9417.1	Murine-specific	7-qD2-11976.1	Eutherian	chr7:69886564-69886593:-	TGGACTTCTGGTCTCCAGTTCTCGAGCCC	chr7:73821454-73821494:-	TGGACTTCTGGTCTCCAGAACCAGGAGAGAAGAAGTACTC	103	1	13	1
7-qD1-9417.1	Murine-specific	7-qD2-11976.1	Eutherian	chr7:69886565-69886593:-	TGGACTTCTGGTCTCCAGTTCTCGAGCT	chr7:73821454-73821494:-	TGGACTTCTGGTCTCCAGAACCAGGAGAGAAGAAGTACTC	33	1	13	1
7-qD1-9417.1	Murine-specific	7-qD2-11976.1	Eutherian	chr7:69886565-69886593:-	TGGACTTCTGGTCTCCAGTTCTCGAGCC	chr7:73821454-73821494:-	TGGACTTCTGGTCTCCAGAACCAGGAGAGAAGAAGTACTC	50	1	13	1
7-qD1-9417.1	Murine-specific	7-qD2-11976.1	Eutherian	chr7:69886566-69886593:-	TGGACTTCTGGTCTCCAGTTCTCGAGC	chr7:73821454-73821494:-	TGGACTTCTGGTCTCCAGAACCAGGAGAGAAGAAGTACTC	46	1	13	1
18-qE1-1295.1	Mouse-specific	12-qE-23911.1	Eutherian	chr18:67070596-67070621:+	TAAGTCAGGACCTCTGAGAAGTAAA	chr12:98401774-98401814:+	CAAGTCAGGACCCATGGGAAAGCATTAAGAGGTTCACAAA	58	1	19	1
17-qA3.3-26735.1	Eutherian	12-qE-7089.1	Eutherian	chr17:27340255-27340283:+	TGAGCAAAAGAAGTCAGACATAAAAGGG	chr12:98427678-98427718:-	TGAGCAAAAGGAGTCAGCCAAGTCCCATCAGAAGAGAGCT	43	1	45	1
17-qA3.3-26735.1	Eutherian	12-qE-7089.1	Eutherian	chr17:27340255-27340284:+	TGAGCAAAAGAAGTCAGACATAAAAGGGC	chr12:98427678-98427718:-	TGAGCAAAAGGAGTCAGCCAAGTCCCATCAGAAGAGAGCT	48	1	45	1
1-qD-4525.1	Murine-specific	4-qB3-277.1	Murine-specific	chr1:92995686-92995716:-	TAGCTCACAGAACACAGGGGTCTTCAAAGC	chr4:62232958-62232998:-	GAGCTCACAAAACACAGGCAGGCCCTGGGTAGACAGACCA	77	1	48	2
1-qD-4525.1	Murine-specific	4-qB3-277.1	Murine-specific	chr1:92995687-92995716:-	TAGCTCACAGAACACAGGGGTCTTCAAAG	chr4:62232958-62232998:-	GAGCTCACAAAACACAGGCAGGCCCTGGGTAGACAGACCA	51	1	48	2
15-qD1-17920.1	Eutherian	6-qF3-28913.1	Murine-specific	chr15:59270431-59270461:-	TGCCAGTCGCCAGGACTCCAGCAAAGGGAA	chr6:127797864-127797904:-	TGCCAGTCACCAGCACTCAACTTGCATAGTCTCCTGAAAA	199	1	14	1
15-qD1-17920.1	Eutherian	6-qF3-28913.1	Murine-specific	chr15:59270432-59270461:-	TGCCAGTCGCCAGGACTCCAGCAAAGGGA	chr6:127797864-127797904:-	TGCCAGTCACCAGCACTCAACTTGCATAGTCTCCTGAAAA	212	1	14	1
15-qD1-17920.1	Eutherian	6-qF3-28913.1	Murine-specific	chr15:59270432-59270461:-	TGCCAGTCGCCAGGACTCCAGCAAAGGGT	chr6:127797864-127797904:-	TGCCAGTCACCAGCACTCAACTTGCATAGTCTCCTGAAAA	52	1	14	1
15-qD1-17920.1	Eutherian	6-qF3-28913.1	Murine-specific	chr15:59270433-59270461:-	TGCCAGTCGCCAGGACTCCAGCAAAGGG	chr6:127797864-127797904:-	TGCCAGTCACCAGCACTCAACTTGCATAGTCTCCTGAAAA	77	1	14	1
15-qD1-17920.1	Eutherian	6-qF3-28913.1	Murine-specific	chr15:59270434-59270461:-	TGCCAGTCGCCAGGACTCCAGCAAAGG	chr6:127797864-127797904:-	TGCCAGTCACCAGCACTCAACTTGCATAGTCTCCTGAAAA	31	1	14	1
15-qD1-17920.1	Eutherian	6-qF3-28913.1	Murine-specific	chr15:59270436-59270461:-	TGCCAGTCGCCAGGACTCCAGCAAA	chr6:127797864-127797904:-	TGCCAGTCACCAGCACTCAACTTGCATAGTCTCCTGAAAA	39	1	14	1
15-qD1-17920.1	Eutherian	11-qE1-3997.1	Mouse-specific	chr15:59259221-59259252:-	CCATTTTACAGATGAGAAAATTGAAGGCCAG	chr11:107995777-107995817:-	CCATTTTACAGACGACAAAACTGAGGCCCCAGAGAAAGTA	37	1	194	1
15-qD1-17920.1	Eutherian	11-qE1-3997.1	Mouse-specific	chr15:59259222-59259252:-	CCATTTTACAGATGAGAAAATTGAAGGCCT	chr11:107995777-107995817:-	CCATTTTACAGACGACAAAACTGAGGCCCCAGAGAAAGTA	66	1	194	1
15-qD1-17920.1	Eutherian	11-qE1-3997.1	Mouse-specific	chr15:59259222-59259252:-	CCATTTTACAGATGAGAAAATTGAAGGCCA	chr11:107995777-107995817:-	CCATTTTACAGACGACAAAACTGAGGCCCCAGAGAAAGTA	94	1	194	1
15-qD1-17920.1	Eutherian	11-qE1-3997.1	Mouse-specific	chr15:59259223-59259252:-	CCATTTTACAGATGAGAAAATTGAAGGCC	chr11:107995777-107995817:-	CCATTTTACAGACGACAAAACTGAGGCCCCAGAGAAAGTA	686	1	194	1
15-qD1-17920.1	Eutherian	11-qE1-3997.1	Mouse-specific	chr15:59259224-59259252:-	CCATTTTACAGATGAGAAAATTGAAGGC	chr11:107995777-107995817:-	CCATTTTACAGACGACAAAACTGAGGCCCCAGAGAAAGTA	53	1	194	1
15-qD1-17920.1	Eutherian	11-qE1-3997.1	Mouse-specific	chr15:59259225-59259252:-	CCATTTTACAGATGAGAAAATTGAAGG	chr11:107995777-107995817:-	CCATTTTACAGACGACAAAACTGAGGCCCCAGAGAAAGTA	45	1	194	1
17-qE1.1-7037.1	Mouse-specific	15-qE1-1119.1	Mouse-specific	chr17:66224335-66224363:+	TTCTCAATTAGTGATTGAGGTGGATAGG	chr15:79945840-79945880:-	TTCTCAATTAGTGATCAAGGGGGGAGGGCCCCTTGTGGGC	214	1	23	1
17-qE1.1-7037.1	Mouse-specific	15-qE1-1119.1	Mouse-specific	chr17:66224335-66224364:+	TTCTCAATTAGTGATTGAGGTGGATAGGA	chr15:79945840-79945880:-	TTCTCAATTAGTGATCAAGGGGGGAGGGCCCCTTGTGGGC	241	1	23	1
17-qE1.1-7037.1	Mouse-specific	15-qE1-1119.1	Mouse-specific	chr17:66224335-66224364:+	TTCTCAATTAGTGATTGAGGTGGATAGGT	chr15:79945840-79945880:-	TTCTCAATTAGTGATCAAGGGGGGAGGGCCCCTTGTGGGC	34	1	23	1
15-qD3-14639.1	Murine-specific	5-qG2-950.1	Murine-specific	chr15:74656946-74656973:+	TACACAGAGAAACCCTGATCCTTTGGT	chr5:136935247-136935287:-	TACACAGAGAAACCCTGTCTCAAAAAACCAAACCAAACCA	34	1	31	1
15-qD3-14639.1	Murine-specific	5-qG2-950.1	Murine-specific	chr15:74656946-74656974:+	TACACAGAGAAACCCTGATCCTTTGGAA	chr5:136935247-136935287:-	TACACAGAGAAACCCTGTCTCAAAAAACCAAACCAAACCA	34	1	31	1
10-qC1-12816.1	Murine-specific	15-qD1-4001.1	Murine-specific	chr10:75840519-75840545:+	TGCTGAGTTCAATCATCAAAGGTACC	chr15:59287617-59287657:-	TGCTGAGATCAAACATCAGAACCAAGACCACTAATAGAAA	31	1	13	1
2-qE1-35981.1	Eutherian	5-qF-14224.1	Eutherian	chr2:92568020-92568049:+	AATGAATGAATGAATGAGCAGACTGTTTA	chr5:113370644-113370684:-	AATGAATGAATGAATGAATGAAAATATGAAGCTAAAGCAT	425	1	25	1
9-qC-31469.1	Murine-specific	5-qF-14224.1	Eutherian	chr9:67728518-67728544:-	AATGAATGAATGAATGGGGGTGTCTA	chr5:113370644-113370684:-	AATGAATGAATGAATGAATGAAAATATGAAGCTAAAGCAT	31	1	25	1
9-qC-31469.1	Murine-specific	5-qF-14224.1	Eutherian	chr9:67728519-67728544:-	AATGAATGAATGAATGGGGGTGTCT	chr5:113370644-113370684:-	AATGAATGAATGAATGAATGAAAATATGAAGCTAAAGCAT	657	1	25	1
9-qC-31469.1	Murine-specific	5-qF-14224.1	Eutherian	chr9:67728519-67728548:-	AATGAATGAATGAATGAATGGGGGTGTCT	chr5:113370644-113370684:-	AATGAATGAATGAATGAATGAAAATATGAAGCTAAAGCAT	1105	1	25	1
9-qC-31469.1	Murine-specific	5-qF-14224.1	Eutherian	chr9:67728520-67728544:-	AATGAATGAATGAATGGGGGTGTC	chr5:113370644-113370684:-	AATGAATGAATGAATGAATGAAAATATGAAGCTAAAGCAT	84	1	25	1
9-qC-31469.1	Murine-specific	5-qF-14224.1	Eutherian	chr9:67728520-67728548:-	AATGAATGAATGAATGAATGGGGGTGTC	chr5:113370644-113370684:-	AATGAATGAATGAATGAATGAAAATATGAAGCTAAAGCAT	312	1	25	1
9-qC-31469.1	Murine-specific	5-qF-14224.1	Eutherian	chr9:67728521-67728548:-	AATGAATGAATGAATGAATGGGGGTGT	chr5:113370644-113370684:-	AATGAATGAATGAATGAATGAAAATATGAAGCTAAAGCAT	72	1	25	1
9-qC-31469.1	Murine-specific	5-qF-14224.1	Eutherian	chr9:67728522-67728548:-	AATGAATGAATGAATGAATGGGGGTG	chr5:113370644-113370684:-	AATGAATGAATGAATGAATGAAAATATGAAGCTAAAGCAT	73	1	25	1
9-qC-31469.1	Murine-specific	5-qF-14224.1	Eutherian	chr9:67728523-67728548:-	AATGAATGAATGAATGAATGGGGGT	chr5:113370644-113370684:-	AATGAATGAATGAATGAATGAAAATATGAAGCTAAAGCAT	53	1	25	1
9-qC-31469.1	Murine-specific	5-qF-14224.1	Eutherian	chr9:67728523-67728552:-	AATGAATGAATGAATGAATGAATGGGGGT	chr5:113370644-113370684:-	AATGAATGAATGAATGAATGAAAATATGAAGCTAAAGCAT	65	1	25	1
15-qD3-14639.1	Murine-specific	6-qF3-8009.1	Eutherian	chr15:74642474-74642499:+	TCCAAGGCCACTCTGTACATGGTGT	chr6:127784199-127784239:+	CCCAAGGCCTCTCTGTGCATCTGCCAGCCACGTTTATCTC	77	1	69	1
15-qD3-14639.1	Murine-specific	6-qF3-8009.1	Eutherian	chr15:74642474-74642500:+	TCCAAGGCCACTCTGTACATGGTGTC	chr6:127784199-127784239:+	CCCAAGGCCTCTCTGTGCATCTGCCAGCCACGTTTATCTC	86	1	69	1
15-qD3-14639.1	Murine-specific	6-qF3-8009.1	Eutherian	chr15:74642474-74642501:+	TCCAAGGCCACTCTGTACATGGTGTCT	chr6:127784199-127784239:+	CCCAAGGCCTCTCTGTGCATCTGCCAGCCACGTTTATCTC	41	1	69	1
15-qD3-14639.1	Murine-specific	6-qF3-8009.1	Eutherian	chr15:74642474-74642504:+	TCCAAGGCCACTCTGTACATGGTGTCTACC	chr6:127784199-127784239:+	CCCAAGGCCTCTCTGTGCATCTGCCAGCCACGTTTATCTC	389	1	69	1
15-qD3-14639.1	Murine-specific	6-qF3-8009.1	Eutherian	chr15:74642474-74642505:+	TCCAAGGCCACTCTGTACATGGTGTCTACCC	chr6:127784199-127784239:+	CCCAAGGCCTCTCTGTGCATCTGCCAGCCACGTTTATCTC	264	1	69	1
2-qE1-35981.1	Eutherian	17-qE1.1-7037.1	Mouse-specific	chr2:92550358-92550382:+	TACTGATGTGGTGACTTCTCTGCT	chr17:66207674-66207714:-	GACTGATGTGGTGACATCTCGCATATAAGGTGCCTTCTGT	252	1	41	1
2-qE1-35981.1	Eutherian	17-qE1.1-7037.1	Mouse-specific	chr2:92550358-92550383:+	TACTGATGTGGTGACTTCTCTGCTT	chr17:66207674-66207714:-	GACTGATGTGGTGACATCTCGCATATAAGGTGCCTTCTGT	60	1	41	1
2-qE1-35981.1	Eutherian	17-qE1.1-7037.1	Mouse-specific	chr2:92550358-92550383:+	TACTGATGTGGTGACTTCTCTGCTA	chr17:66207674-66207714:-	GACTGATGTGGTGACATCTCGCATATAAGGTGCCTTCTGT	67	1	41	1
2-qE1-35981.1	Eutherian	17-qE1.1-7037.1	Mouse-specific	chr2:92550358-92550384:+	TACTGATGTGGTGACTTCTCTGCTAA	chr17:66207674-66207714:-	GACTGATGTGGTGACATCTCGCATATAAGGTGCCTTCTGT	91	1	41	1
2-qE1-35981.1	Eutherian	17-qE1.1-7037.1	Mouse-specific	chr2:92550358-92550385:+	TACTGATGTGGTGACTTCTCTGCTAAA	chr17:66207674-66207714:-	GACTGATGTGGTGACATCTCGCATATAAGGTGCCTTCTGT	35	1	41	1
2-qE1-35981.1	Eutherian	17-qE1.1-7037.1	Mouse-specific	chr2:92550358-92550386:+	TACTGATGTGGTGACTTCTCTGCTAAAT	chr17:66207674-66207714:-	GACTGATGTGGTGACATCTCGCATATAAGGTGCCTTCTGT	50	1	41	1
2-qE1-35981.1	Eutherian	17-qE1.1-7037.1	Mouse-specific	chr2:92550358-92550386:+	TACTGATGTGGTGACTTCTCTGCTAAAC	chr17:66207674-66207714:-	GACTGATGTGGTGACATCTCGCATATAAGGTGCCTTCTGT	52	1	41	1
2-qE1-35981.1	Eutherian	17-qE1.1-7037.1	Mouse-specific	chr2:92550358-92550387:+	TACTGATGTGGTGACTTCTCTGCTAAACT	chr17:66207674-66207714:-	GACTGATGTGGTGACATCTCGCATATAAGGTGCCTTCTGT	4039	1	41	1
2-qE1-35981.1	Eutherian	17-qE1.1-7037.1	Mouse-specific	chr2:92550358-92550388:+	TACTGATGTGGTGACTTCTCTGCTAAACTG	chr17:66207674-66207714:-	GACTGATGTGGTGACATCTCGCATATAAGGTGCCTTCTGT	178	1	41	1
2-qE1-35981.1	Eutherian	17-qE1.1-7037.1	Mouse-specific	chr2:92550358-92550388:+	TACTGATGTGGTGACTTCTCTGCTAAACTT	chr17:66207674-66207714:-	GACTGATGTGGTGACATCTCGCATATAAGGTGCCTTCTGT	50	1	41	1
2-qE1-35981.1	Eutherian	17-qE1.1-7037.1	Mouse-specific	chr2:92550358-92550389:+	TACTGATGTGGTGACTTCTCTGCTAAACTGT	chr17:66207674-66207714:-	GACTGATGTGGTGACATCTCGCATATAAGGTGCCTTCTGT	37	1	41	1
11-qE1-9443.1	Murine-specific	14-qA3-2286.1	Mouse-specific	chr11:103449076-103449104:+	TAATAGTGTCAGGAGTTGGCTTTTTCCC	chr14:24362478-24362518:+	TAATAGTGTCAGGGATTGGTGCTTGCCCATGGGATGGGCC	43	1	53	1
11-qE1-9443.1	Murine-specific	14-qA3-2286.1	Mouse-specific	chr11:103449076-103449105:+	TAATAGTGTCAGGAGTTGGCTTTTTCCCT	chr14:24362478-24362518:+	TAATAGTGTCAGGGATTGGTGCTTGCCCATGGGATGGGCC	44	1	53	1
10-qC1-12816.1	Murine-specific	15-qD1-4001.1	Murine-specific	chr10:75858405-75858430:+	TTTCTCTCTGTAGACCAGGCTGACC	chr15:59284274-59284314:-	TTTCTCTGTGTAGCCCTGGCTGTCCTGGAGCTCAACTTTG	63	1	24	1
10-qC1-2617.1	Murine-specific	15-qD1-4001.1	Murine-specific	chr10:85748664-85748693:+	TTTCTCTGTGTAGGCCTGACTGTACTGGA	chr15:59284274-59284314:-	TTTCTCTGTGTAGCCCTGGCTGTCCTGGAGCTCAACTTTG	440	3	24	1
10-qC1-1527.1	Mouse-specific	15-qD1-4001.1	Murine-specific	chr10:86591382-86591411:-	TTTCTCTGTGTAGGCCTGACTGTACTGGA	chr15:59284274-59284314:-	TTTCTCTGTGTAGCCCTGGCTGTCCTGGAGCTCAACTTTG	440	3	24	1
10-qC1-875.1	Murine-specific	15-qD1-4001.1	Murine-specific	chr10:86617130-86617159:+	TTTCTCTGTGTAGGCCTGACTGTACTGGA	chr15:59284274-59284314:-	TTTCTCTGTGTAGCCCTGGCTGTCCTGGAGCTCAACTTTG	440	3	24	1
pi-Tmem194.1	Murine-specific	15-qD1-4001.1	Murine-specific	chr10:127697479-127697508:+	TTTCTCTGCATAGCCCTTGCTGTCGTAGA	chr15:59284274-59284314:-	TTTCTCTGTGTAGCCCTGGCTGTCCTGGAGCTCAACTTTG	31	1	24	1
17-qE1.1-7037.1	Mouse-specific	15-qD1-4001.1	Murine-specific	chr17:66206921-66206949:+	TTTCTCTGCATAGCCCTGGTATCCTAGA	chr15:59284274-59284314:-	TTTCTCTGTGTAGCCCTGGCTGTCCTGGAGCTCAACTTTG	54	1	24	1
17-qE1.1-7037.1	Mouse-specific	15-qD1-4001.1	Murine-specific	chr17:66206921-66206950:+	TTTCTCTGCATAGCCCTGGTATCCTAGAA	chr15:59284274-59284314:-	TTTCTCTGTGTAGCCCTGGCTGTCCTGGAGCTCAACTTTG	47	1	24	1
2-qE1-35981.1	Eutherian	15-qD1-4001.1	Murine-specific	chr2:92568221-92568246:+	TTTCTCTGTGGGGCCCTGGATGTCC	chr15:59284274-59284314:-	TTTCTCTGTGTAGCCCTGGCTGTCCTGGAGCTCAACTTTG	109	1	24	1
2-qE1-35981.1	Eutherian	15-qD1-4001.1	Murine-specific	chr2:92568221-92568249:+	TTTCTCTGTGGGGCCCTGGATGTCCTGG	chr15:59284274-59284314:-	TTTCTCTGTGTAGCCCTGGCTGTCCTGGAGCTCAACTTTG	280	1	24	1
2-qE1-35981.1	Eutherian	15-qD1-4001.1	Murine-specific	chr2:92568221-92568250:+	TTTCTCTGTGGGGCCCTGGATGTCCTGGA	chr15:59284274-59284314:-	TTTCTCTGTGTAGCCCTGGCTGTCCTGGAGCTCAACTTTG	996	1	24	1
2-qE1-35981.1	Eutherian	15-qD1-4001.1	Murine-specific	chr2:92568221-92568251:+	TTTCTCTGTGGGGCCCTGGATGTCCTGGAA	chr15:59284274-59284314:-	TTTCTCTGTGTAGCCCTGGCTGTCCTGGAGCTCAACTTTG	38	1	24	1
2-qE1-35981.1	Eutherian	15-qD1-4001.1	Murine-specific	chr2:92568221-92568252:+	TTTCTCTGTGGGGCCCTGGATGTCCTGGAAC	chr15:59284274-59284314:-	TTTCTCTGTGTAGCCCTGGCTGTCCTGGAGCTCAACTTTG	42	1	24	1
2-qE1-35981.1	Eutherian	15-qD1-4001.1	Murine-specific	chr2:92580704-92580731:+	TTTCTCTGTGTTGCCTTGACTGTCCTG	chr15:59284274-59284314:-	TTTCTCTGTGTAGCCCTGGCTGTCCTGGAGCTCAACTTTG	167	5	24	1
2-qE1-35981.1	Eutherian	15-qD1-4001.1	Murine-specific	chr2:92580704-92580732:+	TTTCTCTGTGTTGCCTTGACTGTCCTGG	chr15:59284274-59284314:-	TTTCTCTGTGTAGCCCTGGCTGTCCTGGAGCTCAACTTTG	215	4	24	1
2-qE1-35981.1	Eutherian	15-qD1-4001.1	Murine-specific	chr2:92580704-92580733:+	TTTCTCTGTGTTGCCTTGACTGTCCTGGA	chr15:59284274-59284314:-	TTTCTCTGTGTAGCCCTGGCTGTCCTGGAGCTCAACTTTG	883	3	24	1
2-qE1-35981.1	Eutherian	15-qD1-4001.1	Murine-specific	chr2:92580704-92580735:+	TTTCTCTGTGTTGCCTTGACTGTCCTGGAAT	chr15:59284274-59284314:-	TTTCTCTGTGTAGCCCTGGCTGTCCTGGAGCTCAACTTTG	49	1	24	1
7-qD1-19431.1	Eutherian	15-qD1-4001.1	Murine-specific	chr7:73137874-73137901:+	TTTCTCTGTGGGGTCCTGGCTGTCCTG	chr15:59284274-59284314:-	TTTCTCTGTGTAGCCCTGGCTGTCCTGGAGCTCAACTTTG	76	1	24	1
7-qD1-19431.1	Eutherian	15-qD1-4001.1	Murine-specific	chr7:73137874-73137902:+	TTTCTCTGTGGGGTCCTGGCTGTCCTGA	chr15:59284274-59284314:-	TTTCTCTGTGTAGCCCTGGCTGTCCTGGAGCTCAACTTTG	523	1	24	1
7-qD1-19431.1	Eutherian	15-qD1-4001.1	Murine-specific	chr7:73137874-73137903:+	TTTCTCTGTGGGGTCCTGGCTGTCCTGAA	chr15:59284274-59284314:-	TTTCTCTGTGTAGCCCTGGCTGTCCTGGAGCTCAACTTTG	271	1	24	1
7-qD1-19431.1	Eutherian	15-qD1-4001.1	Murine-specific	chr7:73137874-73137903:+	TTTCTCTGTGGGGTCCTGGCTGTCCTGAT	chr15:59284274-59284314:-	TTTCTCTGTGTAGCCCTGGCTGTCCTGGAGCTCAACTTTG	46	1	24	1
7-qD1-19431.1	Eutherian	15-qD1-4001.1	Murine-specific	chr7:73137874-73137904:+	TTTCTCTGTGGGGTCCTGGCTGTCCTGAAA	chr15:59284274-59284314:-	TTTCTCTGTGTAGCCCTGGCTGTCCTGGAGCTCAACTTTG	34	1	24	1
7-qD1-19431.1	Eutherian	15-qD1-4001.1	Murine-specific	chr7:73137874-73137904:+	TTTCTCTGTGGGGTCCTGGCTGTCCTGAAT	chr15:59284274-59284314:-	TTTCTCTGTGTAGCCCTGGCTGTCCTGGAGCTCAACTTTG	75	1	24	1
2-qE1-35981.1	Eutherian	7-qD2-24830.1	Eutherian	chr2:92593719-92593745:+	TATGATATGGGTCTTGTTTTTGTTGG	chr7:73810163-73810203:+	AATGATATGGGTCTTGTATCTGGGATGGGAGTTGGATGAG	37	1	49	1
2-qE1-35981.1	Eutherian	7-qD2-24830.1	Eutherian	chr2:92593719-92593749:+	TATGATATGGGTCTTGTTTTTGTTGGATGT	chr7:73810163-73810203:+	AATGATATGGGTCTTGTATCTGGGATGGGAGTTGGATGAG	36	1	49	1
17-qE1.1-7037.1	Mouse-specific	5-qG2-2301.1	Mouse-specific	chr17:66221816-66221845:+	TCAATTCCTAGCAAACACATGATGGTTCA	chr5:143767825-143767865:-	TCAATTCCCAGCACCCACGTGGCAGCTCACAACTGTCATT	59	1	31	1
17-qE1.1-7037.1	Mouse-specific	5-qG2-2301.1	Mouse-specific	chr17:66221816-66221846:+	TCAATTCCTAGCAAACACATGATGGTTCAC	chr5:143767825-143767865:-	TCAATTCCCAGCACCCACGTGGCAGCTCACAACTGTCATT	93	1	31	1
3-qA2-617.1	Mouse-specific	pi-1700006A11Rik.1	Murine-specific	chr3:20463934-20463964:-	CACATTGTCTTGGCTAGTATCGGTGCTACT	chr3:124412484-124412524:+	CACATTGTCATGGCTGGTAGTTGAGCCACAGGTAATCATT	50	1	123	1
3-qA2-617.1	Mouse-specific	pi-1700006A11Rik.1	Murine-specific	chr3:20463934-20463964:-	CACATTGTCTTGGCTAGTATCGGTGCTACA	chr3:124412484-124412524:+	CACATTGTCATGGCTGGTAGTTGAGCCACAGGTAATCATT	55	1	123	1
3-qA2-617.1	Mouse-specific	pi-1700006A11Rik.1	Murine-specific	chr3:20463935-20463964:-	CACATTGTCTTGGCTAGTATCGGTGCTAC	chr3:124412484-124412524:+	CACATTGTCATGGCTGGTAGTTGAGCCACAGGTAATCATT	91	1	123	1
3-qA2-617.1	Mouse-specific	pi-1700006A11Rik.1	Murine-specific	chr3:20463936-20463964:-	CACATTGTCTTGGCTAGTATCGGTGCTA	chr3:124412484-124412524:+	CACATTGTCATGGCTGGTAGTTGAGCCACAGGTAATCATT	69	1	123	1
11-qE1-9443.1	Murine-specific	9-qC-31469.1	Murine-specific	chr11:103433788-103433812:+	GTCAGCTTTCCTGAGGAGTGGTCT	chr9:67709019-67709059:+	ATCAGCTTTCCTGAGGAATGGTTTCCTGGTCAGGTGGTGG	174	1	57	1
11-qE1-9443.1	Murine-specific	9-qC-31469.1	Murine-specific	chr11:103433788-103433813:+	GTCAGCTTTCCTGAGGAGTGGTCTC	chr9:67709019-67709059:+	ATCAGCTTTCCTGAGGAATGGTTTCCTGGTCAGGTGGTGG	102	1	57	1
11-qE1-9443.1	Murine-specific	9-qC-31469.1	Murine-specific	chr11:103433788-103433815:+	GTCAGCTTTCCTGAGGAGTGGTCTCCT	chr9:67709019-67709059:+	ATCAGCTTTCCTGAGGAATGGTTTCCTGGTCAGGTGGTGG	58	1	57	1
11-qE1-9443.1	Murine-specific	9-qC-31469.1	Murine-specific	chr11:103433788-103433816:+	GTCAGCTTTCCTGAGGAGTGGTCTCCTG	chr9:67709019-67709059:+	ATCAGCTTTCCTGAGGAATGGTTTCCTGGTCAGGTGGTGG	133	1	57	1
11-qE1-9443.1	Murine-specific	9-qC-31469.1	Murine-specific	chr11:103433788-103433818:+	GTCAGCTTTCCTGAGGAGTGGTCTCCTGGC	chr9:67709019-67709059:+	ATCAGCTTTCCTGAGGAATGGTTTCCTGGTCAGGTGGTGG	94	1	57	1
11-qE1-9443.1	Murine-specific	9-qC-31469.1	Murine-specific	chr11:103433788-103433819:+	GTCAGCTTTCCTGAGGAGTGGTCTCCTGGCT	chr9:67709019-67709059:+	ATCAGCTTTCCTGAGGAATGGTTTCCTGGTCAGGTGGTGG	38	1	57	1
5-qF-14224.1	Eutherian	9-qC-31469.1	Murine-specific	chr5:113342129-113342155:+	TTCAGCTTTCCTGCGGTGTTGGTTGC	chr9:67709019-67709059:+	ATCAGCTTTCCTGAGGAATGGTTTCCTGGTCAGGTGGTGG	311	1	57	1
5-qF-14224.1	Eutherian	9-qC-31469.1	Murine-specific	chr5:113342129-113342156:+	TTCAGCTTTCCTGCGGTGTTGGTTGCT	chr9:67709019-67709059:+	ATCAGCTTTCCTGAGGAATGGTTTCCTGGTCAGGTGGTGG	59	1	57	1
5-qF-14224.1	Eutherian	9-qC-31469.1	Murine-specific	chr5:113342129-113342158:+	TTCAGCTTTCCTGCGGTGTTGGTTGCTGT	chr9:67709019-67709059:+	ATCAGCTTTCCTGAGGAATGGTTTCCTGGTCAGGTGGTGG	133	1	57	1
5-qF-14224.1	Eutherian	9-qC-31469.1	Murine-specific	chr5:113342129-113342159:+	TTCAGCTTTCCTGCGGTGTTGGTTGCTGTC	chr9:67709019-67709059:+	ATCAGCTTTCCTGAGGAATGGTTTCCTGGTCAGGTGGTGG	225	1	57	1
5-qF-4633.1	Murine-specific	9-qC-31469.1	Murine-specific	chr5:114851391-114851421:-	TTCAGCTTTCCTGCGGTGTTGGTGTTGGTT	chr9:67709019-67709059:+	ATCAGCTTTCCTGAGGAATGGTTTCCTGGTCAGGTGGTGG	60	1	57	1
5-qF-4633.1	Murine-specific	9-qC-31469.1	Murine-specific	chr5:114851391-114851421:-	TTCAGCTTTCCTGCGGTGTTGGTGTTGGTG	chr9:67709019-67709059:+	ATCAGCTTTCCTGAGGAATGGTTTCCTGGTCAGGTGGTGG	67	1	57	1
5-qF-4633.1	Murine-specific	9-qC-31469.1	Murine-specific	chr5:114851392-114851421:-	TTCAGCTTTCCTGCGGTGTTGGTGTTGGT	chr9:67709019-67709059:+	ATCAGCTTTCCTGAGGAATGGTTTCCTGGTCAGGTGGTGG	220	1	57	1
5-qF-4633.1	Murine-specific	9-qC-31469.1	Murine-specific	chr5:114851393-114851421:-	TTCAGCTTTCCTGCGGTGTTGGTGTTGG	chr9:67709019-67709059:+	ATCAGCTTTCCTGAGGAATGGTTTCCTGGTCAGGTGGTGG	34	1	57	1
5-qF-4633.1	Murine-specific	9-qC-31469.1	Murine-specific	chr5:114851395-114851421:-	TTCAGCTTTCCTGCGGTGTTGGTGTT	chr9:67709019-67709059:+	ATCAGCTTTCCTGAGGAATGGTTTCCTGGTCAGGTGGTGG	180	1	57	1
5-qF-4633.1	Murine-specific	9-qC-31469.1	Murine-specific	chr5:114851396-114851421:-	TTCAGCTTTCCTGCGGTGTTGGTGT	chr9:67709019-67709059:+	ATCAGCTTTCCTGAGGAATGGTTTCCTGGTCAGGTGGTGG	65	1	57	1
5-qF-4633.1	Murine-specific	9-qC-31469.1	Murine-specific	chr5:114851397-114851421:-	TTCAGCTTTCCTGCGGTGTTGGTG	chr9:67709019-67709059:+	ATCAGCTTTCCTGAGGAATGGTTTCCTGGTCAGGTGGTGG	39	1	57	1
12-qE-7089.1	Eutherian	7-qF3-3125.1	Murine-specific	chr12:98420362-98420386:+	AAAAAGACAGAGAAGAAGGACAGG	chr7:125349656-125349696:+	GAAAAGACAGAGGAGAGGCAACTGGGAAGTGAGGTACTCT	51	1	119	1
12-qE-7089.1	Eutherian	7-qF3-3125.1	Murine-specific	chr12:98420362-98420388:+	AAAAAGACAGAGAAGAAGGACAGGGA	chr7:125349656-125349696:+	GAAAAGACAGAGGAGAGGCAACTGGGAAGTGAGGTACTCT	42	1	119	1
12-qE-7089.1	Eutherian	7-qF3-3125.1	Murine-specific	chr12:98420362-98420389:+	AAAAAGACAGAGAAGAAGGACAGGGAC	chr7:125349656-125349696:+	GAAAAGACAGAGGAGAGGCAACTGGGAAGTGAGGTACTCT	91	1	119	1
14-qA3-19970.1	Murine-specific	15-qD3-14639.1	Murine-specific	chr14:24116988-24117017:+	TGCTGTGATAAAATATCATGACCTAGAGA	chr15:74655837-74655877:-	TGCTGTGGTAAAACATCCTGACCATAAACAATTGGAAGAG	263	1	44	1
14-qA3-19970.1	Murine-specific	15-qD3-14639.1	Murine-specific	chr14:24116988-24117018:+	TGCTGTGATAAAATATCATGACCTAGAGAA	chr15:74655837-74655877:-	TGCTGTGGTAAAACATCCTGACCATAAACAATTGGAAGAG	259	1	44	1
2-qE1-35981.1	Eutherian	15-qD3-14639.1	Murine-specific	chr2:92587221-92587249:+	TGCTGTGATAAAACCTCATGACCAGAAG	chr15:74655837-74655877:-	TGCTGTGGTAAAACATCCTGACCATAAACAATTGGAAGAG	70	2	44	1
2-qE1-35981.1	Eutherian	15-qD3-14639.1	Murine-specific	chr2:92587221-92587250:+	TGCTGTGATAAAACCTCATGACCAGAAGC	chr15:74655837-74655877:-	TGCTGTGGTAAAACATCCTGACCATAAACAATTGGAAGAG	100	1	44	1
2-qE1-35981.1	Eutherian	15-qD3-14639.1	Murine-specific	chr2:92587221-92587251:+	TGCTGTGATAAAACCTCATGACCAGAAGCT	chr15:74655837-74655877:-	TGCTGTGGTAAAACATCCTGACCATAAACAATTGGAAGAG	172	1	44	1
7-qD2-24830.1	Eutherian	15-qD3-14639.1	Murine-specific	chr7:73803002-73803032:-	TGCTGTGATAAAATAGCCTAACAAAAGACT	chr15:74655837-74655877:-	TGCTGTGGTAAAACATCCTGACCATAAACAATTGGAAGAG	43	1	44	1
7-qD2-24830.1	Eutherian	15-qD3-14639.1	Murine-specific	chr7:73803003-73803032:-	TGCTGTGATAAAATAGCCTAACAAAAGAC	chr15:74655837-74655877:-	TGCTGTGGTAAAACATCCTGACCATAAACAATTGGAAGAG	98	1	44	1
15-qE1-8387.1	Eutherian	7-qD1-16444.1	Eutherian	chr15:78664213-78664244:-	TATCAACCAAACACGACATAAACAAGTTGCT	chr7:69940429-69940469:-	TATCAACCAAACATGGCATATGAAGTTGCAATAAGACTAG	138	1	38	1
15-qE1-8387.1	Eutherian	7-qD1-16444.1	Eutherian	chr15:78664213-78664244:-	TATCAACCAAACACGACATAAACAAGTTGCA	chr7:69940429-69940469:-	TATCAACCAAACATGGCATATGAAGTTGCAATAAGACTAG	63	1	38	1
15-qE1-8387.1	Eutherian	7-qD1-16444.1	Eutherian	chr15:78664214-78664244:-	TATCAACCAAACACGACATAAACAAGTTGC	chr7:69940429-69940469:-	TATCAACCAAACATGGCATATGAAGTTGCAATAAGACTAG	383	1	38	1
15-qE1-8387.1	Eutherian	7-qD1-16444.1	Eutherian	chr15:78664215-78664244:-	TATCAACCAAACACGACATAAACAAGTTG	chr7:69940429-69940469:-	TATCAACCAAACATGGCATATGAAGTTGCAATAAGACTAG	1018	1	38	1
15-qE1-8387.1	Eutherian	7-qD1-16444.1	Eutherian	chr15:78664216-78664244:-	TATCAACCAAACACGACATAAACAAGTT	chr7:69940429-69940469:-	TATCAACCAAACATGGCATATGAAGTTGCAATAAGACTAG	363	1	38	1
15-qE1-8387.1	Eutherian	7-qD1-16444.1	Eutherian	chr15:78664217-78664244:-	TATCAACCAAACACGACATAAACAAGT	chr7:69940429-69940469:-	TATCAACCAAACATGGCATATGAAGTTGCAATAAGACTAG	163	1	38	1
17-qA3.3-26735.1	Eutherian	17-qA3.3-26735.1	Eutherian	chr17:27334705-27334736:+	TGAGCACCTACGATGTGCCAGGCATCGGATG	chr17:27358037-27358077:-	TGAGCACTTACTATGTAGCAGGCATTAGGCTCAGGATCTA	43	1	55	1
2-qE1-35981.1	Eutherian	19-qC2-1361.1	Murine-specific	chr2:92542477-92542501:+	TCTAAAGTGACAACTTACTCGGGG	chr19:37258610-37258650:+	ACTAAAGTGACGGCTTACTCTGGCGTTTTGTCCCAATGCC	40	1	23	1
2-qE1-35981.1	Eutherian	19-qC2-1361.1	Murine-specific	chr2:92542477-92542503:+	TCTAAAGTGACAACTTACTCGGGGGC	chr19:37258610-37258650:+	ACTAAAGTGACGGCTTACTCTGGCGTTTTGTCCCAATGCC	106	1	23	1
2-qE1-35981.1	Eutherian	19-qC2-1361.1	Murine-specific	chr2:92542477-92542504:+	TCTAAAGTGACAACTTACTCGGGGGCC	chr19:37258610-37258650:+	ACTAAAGTGACGGCTTACTCTGGCGTTTTGTCCCAATGCC	147	1	23	1
2-qE1-35981.1	Eutherian	19-qC2-1361.1	Murine-specific	chr2:92542477-92542505:+	TCTAAAGTGACAACTTACTCGGGGGCCA	chr19:37258610-37258650:+	ACTAAAGTGACGGCTTACTCTGGCGTTTTGTCCCAATGCC	94	1	23	1
2-qE1-35981.1	Eutherian	19-qC2-1361.1	Murine-specific	chr2:92542477-92542507:+	TCTAAAGTGACAACTTACTCGGGGGCCACT	chr19:37258610-37258650:+	ACTAAAGTGACGGCTTACTCTGGCGTTTTGTCCCAATGCC	181	1	23	1
2-qE1-35981.1	Eutherian	10-qC1-2617.1	Murine-specific	chr2:92568020-92568049:+	AATGAATGAATGAATGAGCAGACTGTTTA	chr10:85750428-85750468:-	AATGAATGAATGAATGAATTTTTGGTGTGGAACATCTGAT	425	1	28	1
9-qC-31469.1	Murine-specific	10-qC1-2617.1	Murine-specific	chr9:67728518-67728544:-	AATGAATGAATGAATGGGGGTGTCTA	chr10:85750428-85750468:-	AATGAATGAATGAATGAATTTTTGGTGTGGAACATCTGAT	31	1	28	1
9-qC-31469.1	Murine-specific	10-qC1-2617.1	Murine-specific	chr9:67728519-67728544:-	AATGAATGAATGAATGGGGGTGTCT	chr10:85750428-85750468:-	AATGAATGAATGAATGAATTTTTGGTGTGGAACATCTGAT	657	1	28	1
9-qC-31469.1	Murine-specific	10-qC1-2617.1	Murine-specific	chr9:67728519-67728548:-	AATGAATGAATGAATGAATGGGGGTGTCT	chr10:85750428-85750468:-	AATGAATGAATGAATGAATTTTTGGTGTGGAACATCTGAT	1105	1	28	1
9-qC-31469.1	Murine-specific	10-qC1-2617.1	Murine-specific	chr9:67728520-67728544:-	AATGAATGAATGAATGGGGGTGTC	chr10:85750428-85750468:-	AATGAATGAATGAATGAATTTTTGGTGTGGAACATCTGAT	84	1	28	1
9-qC-31469.1	Murine-specific	10-qC1-2617.1	Murine-specific	chr9:67728520-67728548:-	AATGAATGAATGAATGAATGGGGGTGTC	chr10:85750428-85750468:-	AATGAATGAATGAATGAATTTTTGGTGTGGAACATCTGAT	312	1	28	1
9-qC-31469.1	Murine-specific	10-qC1-2617.1	Murine-specific	chr9:67728521-67728548:-	AATGAATGAATGAATGAATGGGGGTGT	chr10:85750428-85750468:-	AATGAATGAATGAATGAATTTTTGGTGTGGAACATCTGAT	72	1	28	1
9-qC-31469.1	Murine-specific	10-qC1-2617.1	Murine-specific	chr9:67728522-67728548:-	AATGAATGAATGAATGAATGGGGGTG	chr10:85750428-85750468:-	AATGAATGAATGAATGAATTTTTGGTGTGGAACATCTGAT	73	1	28	1
9-qC-31469.1	Murine-specific	10-qC1-2617.1	Murine-specific	chr9:67728523-67728548:-	AATGAATGAATGAATGAATGGGGGT	chr10:85750428-85750468:-	AATGAATGAATGAATGAATTTTTGGTGTGGAACATCTGAT	53	1	28	1
9-qC-31469.1	Murine-specific	10-qC1-2617.1	Murine-specific	chr9:67728523-67728552:-	AATGAATGAATGAATGAATGAATGGGGGT	chr10:85750428-85750468:-	AATGAATGAATGAATGAATTTTTGGTGTGGAACATCTGAT	65	1	28	1
10-qB5.1-221.1	Mouse-specific	15-qD1-4001.1	Murine-specific	chr10:66703687-66703714:+	TGCTTTCTTACAGAACCCAGAACCACT	chr15:59286531-59286571:-	TGCTTTCTTACAGAACCCAGGACCTCTAGCCCAGGGATGG	76	1	21	1
10-qB5.1-221.1	Mouse-specific	15-qD1-4001.1	Murine-specific	chr10:66703687-66703716:+	TGCTTTCTTACAGAACCCAGAACCACTAT	chr15:59286531-59286571:-	TGCTTTCTTACAGAACCCAGGACCTCTAGCCCAGGGATGG	32	1	21	1
10-qB5.1-221.1	Mouse-specific	15-qD1-4001.1	Murine-specific	chr10:66703687-66703717:+	TGCTTTCTTACAGAACCCAGAACCACTATC	chr15:59286531-59286571:-	TGCTTTCTTACAGAACCCAGGACCTCTAGCCCAGGGATGG	61	1	21	1
10-qB5.1-221.1	Mouse-specific	15-qD1-4001.1	Murine-specific	chr10:66703687-66703718:+	TGCTTTCTTACAGAACCCAGAACCACTATCC	chr15:59286531-59286571:-	TGCTTTCTTACAGAACCCAGGACCTCTAGCCCAGGGATGG	106	1	21	1
15-qD1-4001.1	Murine-specific	15-qD1-4001.1	Murine-specific	chr15:59299143-59299173:+	TGCTTTCTTATAGAACCCAAGACCAGCAGT	chr15:59286531-59286571:-	TGCTTTCTTACAGAACCCAGGACCTCTAGCCCAGGGATGG	32	1	21	1
17-qA3.3-26735.1	Eutherian	15-qD1-4001.1	Murine-specific	chr17:27341665-27341689:+	TGCTTTCTCACAGAACCTAGGACT	chr15:59286531-59286571:-	TGCTTTCTTACAGAACCCAGGACCTCTAGCCCAGGGATGG	257	1	21	1
17-qA3.3-26735.1	Eutherian	15-qD1-4001.1	Murine-specific	chr17:27341665-27341690:+	TGCTTTCTCACAGAACCTAGGACTA	chr15:59286531-59286571:-	TGCTTTCTTACAGAACCCAGGACCTCTAGCCCAGGGATGG	138	1	21	1
17-qA3.3-26735.1	Eutherian	15-qD1-4001.1	Murine-specific	chr17:27341665-27341691:+	TGCTTTCTCACAGAACCTAGGACTAC	chr15:59286531-59286571:-	TGCTTTCTTACAGAACCCAGGACCTCTAGCCCAGGGATGG	102	1	21	1
17-qA3.3-26735.1	Eutherian	15-qD1-4001.1	Murine-specific	chr17:27341665-27341692:+	TGCTTTCTCACAGAACCTAGGACTACC	chr15:59286531-59286571:-	TGCTTTCTTACAGAACCCAGGACCTCTAGCCCAGGGATGG	3358	1	21	1
17-qA3.3-26735.1	Eutherian	15-qD1-4001.1	Murine-specific	chr17:27341665-27341693:+	TGCTTTCTCACAGAACCTAGGACTACCA	chr15:59286531-59286571:-	TGCTTTCTTACAGAACCCAGGACCTCTAGCCCAGGGATGG	137	1	21	1
17-qA3.3-26735.1	Eutherian	15-qD1-4001.1	Murine-specific	chr17:27341665-27341693:+	TGCTTTCTCACAGAACCTAGGACTACCT	chr15:59286531-59286571:-	TGCTTTCTTACAGAACCCAGGACCTCTAGCCCAGGGATGG	54	1	21	1
17-qA3.3-26735.1	Eutherian	15-qD1-4001.1	Murine-specific	chr17:27341665-27341694:+	TGCTTTCTCACAGAACCTAGGACTACCAG	chr15:59286531-59286571:-	TGCTTTCTTACAGAACCCAGGACCTCTAGCCCAGGGATGG	114	1	21	1
17-qA3.3-26735.1	Eutherian	15-qD1-4001.1	Murine-specific	chr17:27341665-27341695:+	TGCTTTCTCACAGAACCTAGGACTACCAGC	chr15:59286531-59286571:-	TGCTTTCTTACAGAACCCAGGACCTCTAGCCCAGGGATGG	381	1	21	1
17-qA3.3-26735.1	Eutherian	15-qD1-4001.1	Murine-specific	chr17:27341665-27341695:+	TGCTTTCTCACAGAACCTAGGACTACCAGT	chr15:59286531-59286571:-	TGCTTTCTTACAGAACCCAGGACCTCTAGCCCAGGGATGG	54	1	21	1
17-qA3.3-26735.1	Eutherian	15-qD1-4001.1	Murine-specific	chr17:27341665-27341696:+	TGCTTTCTCACAGAACCTAGGACTACCAGCC	chr15:59286531-59286571:-	TGCTTTCTTACAGAACCCAGGACCTCTAGCCCAGGGATGG	79	1	21	1
17-qA3.3-26735.1	Eutherian	15-qD1-4001.1	Murine-specific	chr17:27341665-27341696:+	TGCTTTCTCACAGAACCTAGGACTACCAGCT	chr15:59286531-59286571:-	TGCTTTCTTACAGAACCCAGGACCTCTAGCCCAGGGATGG	91	1	21	1
17-qA3.3-26735.1	Eutherian	15-qD1-4001.1	Murine-specific	chr17:27341665-27341697:+	TGCTTTCTCACAGAACCTAGGACTACCAGCCC	chr15:59286531-59286571:-	TGCTTTCTTACAGAACCCAGGACCTCTAGCCCAGGGATGG	34	1	21	1
5-qG3-23659.1	Eutherian	9-qC-10667.1	Eutherian	chr5:149808462-149808494:-	TGTAAAATGGAGATGATAGCACACATTTGGCA	chr9:67737353-67737393:-	TGTAAAATAGAAATGATACCACTCCTTCCTGCCCTTTAGT	402	1	43	1
5-qG3-23659.1	Eutherian	9-qC-10667.1	Eutherian	chr5:149808462-149808494:-	TGTAAAATGGAGATGATAGCACACATTTGGCT	chr9:67737353-67737393:-	TGTAAAATAGAAATGATACCACTCCTTCCTGCCCTTTAGT	77	1	43	1
5-qG3-23659.1	Eutherian	9-qC-10667.1	Eutherian	chr5:149808463-149808494:-	TGTAAAATGGAGATGATAGCACACATTTGGC	chr9:67737353-67737393:-	TGTAAAATAGAAATGATACCACTCCTTCCTGCCCTTTAGT	339	1	43	1
5-qG3-23659.1	Eutherian	9-qC-10667.1	Eutherian	chr5:149808464-149808494:-	TGTAAAATGGAGATGATAGCACACATTTGG	chr9:67737353-67737393:-	TGTAAAATAGAAATGATACCACTCCTTCCTGCCCTTTAGT	36	1	43	1
5-qG3-23659.1	Eutherian	9-qC-10667.1	Eutherian	chr5:149808464-149808494:-	TGTAAAATGGAGATGATAGCACACATTTGT	chr9:67737353-67737393:-	TGTAAAATAGAAATGATACCACTCCTTCCTGCCCTTTAGT	44	1	43	1
5-qG3-23659.1	Eutherian	9-qC-10667.1	Eutherian	chr5:149808467-149808494:-	TGTAAAATGGAGATGATAGCACACATT	chr9:67737353-67737393:-	TGTAAAATAGAAATGATACCACTCCTTCCTGCCCTTTAGT	76	1	43	1
7-qD1-9417.1	Murine-specific	12-qE-23911.1	Eutherian	chr7:69905555-69905585:-	TCCCAGACTGGTCTTTCTAGGTCTTGCACA	chr12:98387638-98387678:+	TCCCAGACTTGTCTTTCTTAGTGAAGCATACTCTATACTT	184	1	18	1
7-qD1-9417.1	Murine-specific	12-qE-23911.1	Eutherian	chr7:69905555-69905585:-	TCCCAGACTGGTCTTTCTAGGTCTTGCACT	chr12:98387638-98387678:+	TCCCAGACTTGTCTTTCTTAGTGAAGCATACTCTATACTT	86	1	18	1
7-qD1-9417.1	Murine-specific	12-qE-23911.1	Eutherian	chr7:69905556-69905585:-	TCCCAGACTGGTCTTTCTAGGTCTTGCAC	chr12:98387638-98387678:+	TCCCAGACTTGTCTTTCTTAGTGAAGCATACTCTATACTT	126	1	18	1
17-qE1.1-7037.1	Mouse-specific	15-qE1-1119.1	Mouse-specific	chr17:66221816-66221845:+	TCAATTCCTAGCAAACACATGATGGTTCA	chr15:79947695-79947735:-	TCAATTCCCAGCAACCACATAGTGGCTTGTGTGTCTGAAG	59	1	35	1
17-qE1.1-7037.1	Mouse-specific	15-qE1-1119.1	Mouse-specific	chr17:66221816-66221846:+	TCAATTCCTAGCAAACACATGATGGTTCAC	chr15:79947695-79947735:-	TCAATTCCCAGCAACCACATAGTGGCTTGTGTGTCTGAAG	93	1	35	1
10-qC1-12816.1	Murine-specific	18-qE1-36451.1	Eutherian	chr10:75858228-75858255:+	AACAGATCTGTGACCACAGGAGTCCTC	chr18:67057238-67057278:+	CACAGATCTAAGGCCAAAGGAGTAGACACCCCCTCCACAG	41	1	17	1
10-qC1-12816.1	Murine-specific	17-qA3.3-27363.1	Eutherian	chr10:75855828-75855856:+	CAATTTATCAAGACCTGAGTACAGGCAC	chr17:27321585-27321625:+	CAATTTATCAAGATTCAAGTACAGGTCCCTCCCCCATGCC	58	1	34	1
10-qC1-12816.1	Murine-specific	17-qA3.3-27363.1	Eutherian	chr10:75855828-75855858:+	CAATTTATCAAGACCTGAGTACAGGCACAG	chr17:27321585-27321625:+	CAATTTATCAAGATTCAAGTACAGGTCCCTCCCCCATGCC	150	1	34	1
10-qC1-12816.1	Murine-specific	17-qA3.3-27363.1	Eutherian	chr10:75855828-75855859:+	CAATTTATCAAGACCTGAGTACAGGCACAGG	chr17:27321585-27321625:+	CAATTTATCAAGATTCAAGTACAGGTCCCTCCCCCATGCC	140	1	34	1
10-qC1-12816.1	Murine-specific	17-qA3.3-27363.1	Eutherian	chr10:75855828-75855860:+	CAATTTATCAAGACCTGAGTACAGGCACAGGC	chr17:27321585-27321625:+	CAATTTATCAAGATTCAAGTACAGGTCCCTCCCCCATGCC	498	1	34	1
10-qB4-6488.1	Murine-specific	10-qC1-12816.1	Murine-specific	chr10:62661914-62661938:+	GTGAGTTCCAGAACAGACTGAGCT	chr10:75858400-75858440:-	TTGAGTTCCAGGTCAGCCTGGTCTACAGAGAGAAACCTTG	62	1	13	1
9-qA5.3-1495.1	Murine-specific	10-qC1-12816.1	Murine-specific	chr9:54250023-54250048:+	GTGAGTTCAAGGTCAGACAGAGTTC	chr10:75858400-75858440:-	TTGAGTTCCAGGTCAGCCTGGTCTACAGAGAGAAACCTTG	51	1	13	1
5-qF-14508.1	Eutherian	7-qD2-24830.1	Eutherian	chr5:113336278-113336308:-	TTTTATCACAGCAACAGAAAGGAAACTAGG	chr7:73803019-73803059:+	TTTTATCACAGCAACAGAAACAAACAAAACTAGCACCTAG	223	4	89	1
9-qF4-150.1	Murine-specific	7-qD2-24830.1	Eutherian	chr9:122783381-122783410:-	TTTTATCACTGTAACAGATACCCCACCTA	chr7:73803019-73803059:+	TTTTATCACAGCAACAGAAACAAACAAAACTAGCACCTAG	37	1	89	1
9-qF4-150.1	Murine-specific	7-qD2-24830.1	Eutherian	chr9:122783382-122783410:-	TTTTATCACTGTAACAGATACCCCACCT	chr7:73803019-73803059:+	TTTTATCACAGCAACAGAAACAAACAAAACTAGCACCTAG	39	1	89	1
9-qF4-150.1	Murine-specific	7-qD2-24830.1	Eutherian	chr9:122783383-122783410:-	TTTTATCACTGTAACAGATACCCCACC	chr7:73803019-73803059:+	TTTTATCACAGCAACAGAAACAAACAAAACTAGCACCTAG	31	1	89	1
6-qF3-28913.1	Murine-specific	9-qA5.3-1495.1	Murine-specific	chr6:127833823-127833850:+	TGAAGATGAGAAACACACAGCATGAGC	chr9:54260649-54260689:-	TGAAGATGTAAAACTCTCAGCTCCTCCTGTACCATGCCTG	46	1	25	1
17-qA3.3-27363.1	Eutherian	15-qD1-4001.1	Murine-specific	chr17:27307060-27307092:-	TATGCACAGATAGTCTGATCTCCAGTCGAGCT	chr15:59289902-59289942:-	TATGCACAGACAGCTTGGTCTCCAGTCGAGTTGGGAGGTG	249	1	25	1
17-qA3.3-27363.1	Eutherian	15-qD1-4001.1	Murine-specific	chr17:27307061-27307092:-	TATGCACAGATAGTCTGATCTCCAGTCGAGT	chr15:59289902-59289942:-	TATGCACAGACAGCTTGGTCTCCAGTCGAGTTGGGAGGTG	1029	2	25	1
17-qA3.3-27363.1	Eutherian	15-qD1-4001.1	Murine-specific	chr17:27307061-27307092:-	TATGCACAGATAGTCTGATCTCCAGTCGAGC	chr15:59289902-59289942:-	TATGCACAGACAGCTTGGTCTCCAGTCGAGTTGGGAGGTG	918	1	25	1
17-qA3.3-27363.1	Eutherian	15-qD1-4001.1	Murine-specific	chr17:27307062-27307092:-	TATGCACAGATAGTCTGATCTCCAGTCGAG	chr15:59289902-59289942:-	TATGCACAGACAGCTTGGTCTCCAGTCGAGTTGGGAGGTG	1009	1	25	1
17-qA3.3-27363.1	Eutherian	15-qD1-4001.1	Murine-specific	chr17:27307062-27307092:-	TATGCACAGATAGTCTGATCTCCAGTCGAT	chr15:59289902-59289942:-	TATGCACAGACAGCTTGGTCTCCAGTCGAGTTGGGAGGTG	119	1	25	1
17-qA3.3-27363.1	Eutherian	15-qD1-4001.1	Murine-specific	chr17:27307063-27307092:-	TATGCACAGATAGTCTGATCTCCAGTCGA	chr15:59289902-59289942:-	TATGCACAGACAGCTTGGTCTCCAGTCGAGTTGGGAGGTG	2444	1	25	1
17-qA3.3-27363.1	Eutherian	15-qD1-4001.1	Murine-specific	chr17:27307063-27307092:-	TATGCACAGATAGTCTGATCTCCAGTCGT	chr15:59289902-59289942:-	TATGCACAGACAGCTTGGTCTCCAGTCGAGTTGGGAGGTG	286	1	25	1
17-qA3.3-27363.1	Eutherian	15-qD1-4001.1	Murine-specific	chr17:27307064-27307092:-	TATGCACAGATAGTCTGATCTCCAGTCG	chr15:59289902-59289942:-	TATGCACAGACAGCTTGGTCTCCAGTCGAGTTGGGAGGTG	435	1	25	1
17-qA3.3-27363.1	Eutherian	15-qD1-4001.1	Murine-specific	chr17:27307065-27307092:-	TATGCACAGATAGTCTGATCTCCAGTC	chr15:59289902-59289942:-	TATGCACAGACAGCTTGGTCTCCAGTCGAGTTGGGAGGTG	48	1	25	1
17-qA3.3-27363.1	Eutherian	15-qD1-4001.1	Murine-specific	chr17:27307066-27307092:-	TATGCACAGATAGTCTGATCTCCAGT	chr15:59289902-59289942:-	TATGCACAGACAGCTTGGTCTCCAGTCGAGTTGGGAGGTG	95	1	25	1
5-qF-14224.1	Eutherian	9-qA5.3-1495.1	Murine-specific	chr5:113345953-113345979:+	TTATTTACCAATCAAAACCAACCGAG	chr9:54261549-54261589:-	TTATTTACCAATCAAAACCAACTGGGGGACAGGGTTCTCT	49	1	143	1
5-qF-14224.1	Eutherian	9-qA5.3-1495.1	Murine-specific	chr5:113345953-113345981:+	TTATTTACCAATCAAAACCAACCGAGGG	chr9:54261549-54261589:-	TTATTTACCAATCAAAACCAACTGGGGGACAGGGTTCTCT	33	1	143	1
5-qF-14224.1	Eutherian	9-qA5.3-1495.1	Murine-specific	chr5:113345953-113345982:+	TTATTTACCAATCAAAACCAACCGAGGGT	chr9:54261549-54261589:-	TTATTTACCAATCAAAACCAACTGGGGGACAGGGTTCTCT	72	1	143	1
5-qF-14224.1	Eutherian	9-qA5.3-1495.1	Murine-specific	chr5:113345953-113345983:+	TTATTTACCAATCAAAACCAACCGAGGGTA	chr9:54261549-54261589:-	TTATTTACCAATCAAAACCAACTGGGGGACAGGGTTCTCT	162	1	143	1
7-qD1-19431.1	Eutherian	12-qE-23911.1	Eutherian	chr7:73113592-73113620:+	TGTAATCCCAGCATTCTGGAGGTGGAGG	chr12:98382480-98382520:+	TGTAATCCCAATATTCAGGAGGAAAAGGGGGAAGATGAGA	101	1	48	1
7-qD1-19431.1	Eutherian	12-qE-23911.1	Eutherian	chr7:73113592-73113621:+	TGTAATCCCAGCATTCTGGAGGTGGAGGC	chr12:98382480-98382520:+	TGTAATCCCAATATTCAGGAGGAAAAGGGGGAAGATGAGA	78	1	48	1
17-qE1.1-7037.1	Mouse-specific	5-qG3-23659.1	Eutherian	chr17:66213642-66213671:+	TGTTTGTTTGTTTGATTTGACCTGTCACC	chr5:149805408-149805448:+	TGTTTGTTTGTTTGTTTTTTCCTTTCTGAGGGTTAATTTG	382	1	14	1
17-qE1.1-7037.1	Mouse-specific	5-qG3-23659.1	Eutherian	chr17:66213642-66213672:+	TGTTTGTTTGTTTGATTTGACCTGTCACCT	chr5:149805408-149805448:+	TGTTTGTTTGTTTGTTTTTTCCTTTCTGAGGGTTAATTTG	51	1	14	1
10-qB4-6488.1	Murine-specific	10-qB4-6488.1	Murine-specific	chr10:62695378-62695407:+	TACATAGTGAGTTTCAGGACAGCCAGTGT	chr10:62653689-62653729:-	TACATAGCAAGTTCCAGGTCAGCTAGGGCTAAGATGGTAA	40	1	19	1
1-qC1.3-637.1	Mouse-specific	9-qA1-178.1	Murine-specific	chr1:57359369-57359399:-	TTCAAACACAGGAATCTATGGGGCCATATC	chr9:3182049-3182089:+	TTCAAACACAGGAGTCTATGGGGGCCAAACCTATTCAAAC	55	1	34	1
1-qC1.3-637.1	Mouse-specific	9-qA1-178.1	Murine-specific	chr1:57359374-57359399:-	TTCAAACACAGGAATCTATGGGGCC	chr9:3182049-3182089:+	TTCAAACACAGGAGTCTATGGGGGCCAAACCTATTCAAAC	36	1	34	1
2-qG3-1029.1	Murine-specific	9-qA1-178.1	Murine-specific	chr2:151153182-151153211:+	TTCAAACACAAGTGTCTACAGCGAAAATT	chr9:3182049-3182089:+	TTCAAACACAGGAGTCTATGGGGGCCAAACCTATTCAAAC	141	4	34	1
8-qC5-8200.1	Murine-specific	9-qA1-178.1	Murine-specific	chr8:92190538-92190564:+	TTCAAACACATGAGTCTATGGGGGCG	chr9:3182049-3182089:+	TTCAAACACAGGAGTCTATGGGGGCCAAACCTATTCAAAC	280	1	34	1
8-qC5-8200.1	Murine-specific	9-qA1-178.1	Murine-specific	chr8:92190538-92190565:+	TTCAAACACATGAGTCTATGGGGGCGT	chr9:3182049-3182089:+	TTCAAACACAGGAGTCTATGGGGGCCAAACCTATTCAAAC	569	1	34	1
8-qC5-8200.1	Murine-specific	9-qA1-178.1	Murine-specific	chr8:92190538-92190566:+	TTCAAACACATGAGTCTATGTGGGCGTG	chr9:3182049-3182089:+	TTCAAACACAGGAGTCTATGGGGGCCAAACCTATTCAAAC	51	1	34	1
8-qC5-8200.1	Murine-specific	9-qA1-178.1	Murine-specific	chr8:92190538-92190566:+	TTCAAACACATGAGTCTATGGGGGCGTG	chr9:3182049-3182089:+	TTCAAACACAGGAGTCTATGGGGGCCAAACCTATTCAAAC	6818	1	34	1
8-qC5-8200.1	Murine-specific	9-qA1-178.1	Murine-specific	chr8:92190538-92190567:+	TTCAAACACATGAGTCTATGGGGGCGTGT	chr9:3182049-3182089:+	TTCAAACACAGGAGTCTATGGGGGCCAAACCTATTCAAAC	12050	1	34	1
8-qC5-8200.1	Murine-specific	9-qA1-178.1	Murine-specific	chr8:92190538-92190567:+	TTCAAACACATGAGTCTATTGGGGCGTGT	chr9:3182049-3182089:+	TTCAAACACAGGAGTCTATGGGGGCCAAACCTATTCAAAC	31	1	34	1
8-qC5-8200.1	Murine-specific	9-qA1-178.1	Murine-specific	chr8:92190538-92190567:+	TTCAAACACATGAGTCTATGTGGGCGTGT	chr9:3182049-3182089:+	TTCAAACACAGGAGTCTATGGGGGCCAAACCTATTCAAAC	52	1	34	1
8-qC5-8200.1	Murine-specific	9-qA1-178.1	Murine-specific	chr8:92190538-92190567:+	TTCAAACACATGAGTCTATGCGGGCGTGT	chr9:3182049-3182089:+	TTCAAACACAGGAGTCTATGGGGGCCAAACCTATTCAAAC	59	1	34	1
8-qC5-8200.1	Murine-specific	9-qA1-178.1	Murine-specific	chr8:92190538-92190567:+	TTCAAACACATTAGTCTATGGGGGCGTGT	chr9:3182049-3182089:+	TTCAAACACAGGAGTCTATGGGGGCCAAACCTATTCAAAC	78	1	34	1
8-qC5-8200.1	Murine-specific	9-qA1-178.1	Murine-specific	chr8:92190538-92190568:+	TTCAAACACATGAGTCTATGGGGGCGTGTT	chr9:3182049-3182089:+	TTCAAACACAGGAGTCTATGGGGGCCAAACCTATTCAAAC	567	1	34	1
8-qC5-8200.1	Murine-specific	9-qA1-178.1	Murine-specific	chr8:92190538-92190569:+	TTCAAACACATGAGTCTATGGGGGCGTGTTT	chr9:3182049-3182089:+	TTCAAACACAGGAGTCTATGGGGGCCAAACCTATTCAAAC	40	1	34	1
8-qC5-8200.1	Murine-specific	9-qA1-178.1	Murine-specific	chr8:92190538-92190569:+	TTCAAACACATGAGTCTATGGGGGCGTGTGT	chr9:3182049-3182089:+	TTCAAACACAGGAGTCTATGGGGGCCAAACCTATTCAAAC	98	1	34	1
9-qC-10667.1	Eutherian	15-qD3-14639.1	Murine-specific	chr9:67747249-67747278:+	TCTTCTCTGACGACTCTGGGCATTGGTCC	chr15:74640781-74640821:-	TCTTCTCTGATGGCTCTTGGGCTTTGCCTCTCTCCTTTCC	82	1	24	1
9-qC-10667.1	Eutherian	15-qD3-14639.1	Murine-specific	chr9:67747249-67747279:+	TCTTCTCTGACGACTCTGGGCATTGGTCCT	chr15:74640781-74640821:-	TCTTCTCTGATGGCTCTTGGGCTTTGCCTCTCTCCTTTCC	41	1	24	1
15-qE1-8387.1	Eutherian	5-qF-14508.1	Eutherian	chr15:78665778-78665809:-	TATGTCTGTGCACCACGTGCGTGCCTGTTCT	chr5:113323841-113323881:+	TATGTCTGTGTAGCACGTGACTGCCCGGTGCCCTCCGAGG	179	1	73	1
15-qE1-8387.1	Eutherian	5-qF-14508.1	Eutherian	chr15:78665779-78665809:-	TATGTCTGTGCACCACGTGCGTGCCTGTTC	chr5:113323841-113323881:+	TATGTCTGTGTAGCACGTGACTGCCCGGTGCCCTCCGAGG	41	1	73	1
15-qE1-8387.1	Eutherian	5-qF-14508.1	Eutherian	chr15:78665780-78665809:-	TATGTCTGTGCACCACGTGCGTGCCTGTT	chr5:113323841-113323881:+	TATGTCTGTGTAGCACGTGACTGCCCGGTGCCCTCCGAGG	169	1	73	1
15-qE1-8387.1	Eutherian	5-qF-14508.1	Eutherian	chr15:78665781-78665809:-	TATGTCTGTGCACCACGTGCGTGCCTGT	chr5:113323841-113323881:+	TATGTCTGTGTAGCACGTGACTGCCCGGTGCCCTCCGAGG	1373	1	73	1
15-qE1-8387.1	Eutherian	5-qF-14508.1	Eutherian	chr15:78665782-78665809:-	TATGTCTGTGCACCACGTGCGTGCCTG	chr5:113323841-113323881:+	TATGTCTGTGTAGCACGTGACTGCCCGGTGCCCTCCGAGG	162	1	73	1
15-qE1-8387.1	Eutherian	5-qF-14508.1	Eutherian	chr15:78665783-78665809:-	TATGTCTGTGCACCACGTGCGTGCCT	chr5:113323841-113323881:+	TATGTCTGTGTAGCACGTGACTGCCCGGTGCCCTCCGAGG	103	1	73	1
15-qE1-8387.1	Eutherian	5-qF-14508.1	Eutherian	chr15:78665784-78665809:-	TATGTCTGTGCACCACGTGCGTGCC	chr5:113323841-113323881:+	TATGTCTGTGTAGCACGTGACTGCCCGGTGCCCTCCGAGG	42	1	73	1
8-qE1-3748.1	Murine-specific	6-qF3-28913.1	Murine-specific	chr8:110129167-110129195:+	TTGTTTATGCGGGTTAAAGCTATTGACA	chr6:127813132-127813172:-	TTGTTTATGTGGGTTATACCCACTGACATTACACTTTCAA	130	1	43	1
8-qE1-3748.1	Murine-specific	6-qF3-28913.1	Murine-specific	chr8:110129167-110129197:+	TTGTTTATGCGGGTTAAAGCTATTGACAGT	chr6:127813132-127813172:-	TTGTTTATGTGGGTTATACCCACTGACATTACACTTTCAA	1435	1	43	1
8-qE1-3748.1	Murine-specific	6-qF3-28913.1	Murine-specific	chr8:110129167-110129198:+	TTGTTTATGCGGGTTAAAGCTATTGACAGTC	chr6:127813132-127813172:-	TTGTTTATGTGGGTTATACCCACTGACATTACACTTTCAA	87	1	43	1
7-qD1-9417.1	Murine-specific	12-qE-23911.1	Eutherian	chr7:69902672-69902700:-	TGATGTCCTGGAATCTTAACAATAGCAT	chr12:98409304-98409344:+	CGATGTCCTGGAAACTTAAAAGTTGCTAAAAACTGGAAAA	70	1	14	1
10-qC1-875.1	Murine-specific	9-qC-31469.1	Murine-specific	chr10:86618913-86618943:+	ATTCATTCACTCACTCATTCATTCTCTCCC	chr9:67728533-67728573:+	ATTCATTCATTCATTCATTCATACATTCATACATTAATTC	33	1	17	1
10-qC1-875.1	Murine-specific	9-qC-31469.1	Murine-specific	chr10:86618913-86618944:+	ATTCATTCACTCACTCATTCATTCTCTCCCT	chr9:67728533-67728573:+	ATTCATTCATTCATTCATTCATACATTCATACATTAATTC	105	1	17	1
7-qD1-654.1	Murine-specific	9-qC-31469.1	Murine-specific	chr7:73104561-73104591:-	ATTCATTCATTCTTTCTTTCGTTCATTCGT	chr9:67728533-67728573:+	ATTCATTCATTCATTCATTCATACATTCATACATTAATTC	31	1	17	1
10-qB4-6488.1	Murine-specific	9-qA5.3-24188.1	Eutherian	chr10:62661507-62661536:+	TCTACAGCGTGAGCTCCAGGGCATCCAGG	chr9:54222883-54222923:+	TCTACAGAGTGAGTTCGAGGCCAGCCATGGGCTACATGGT	38	1	24	1
10-qB4-6488.1	Murine-specific	9-qA5.3-24188.1	Eutherian	chr10:62661906-62661934:+	TCTACAGAGTGAGTTCCAGAACAGACTG	chr9:54222883-54222923:+	TCTACAGAGTGAGTTCGAGGCCAGCCATGGGCTACATGGT	32	1	24	1
12-qE-23911.1	Eutherian	13-qB1-1517.1	Murine-specific	chr12:98395345-98395374:-	TATCATGGCAGGAATTAGGTGGCAGAACA	chr13:53400157-53400197:-	CATCATGGCAGGAAGTTGGAGCAGGACACGCAGGGTGATT	51	1	15	1
12-qE-23911.1	Eutherian	13-qB1-1517.1	Murine-specific	chr12:98395345-98395374:-	TATCATGGCAGGAATTAGGTGGCAGAACT	chr13:53400157-53400197:-	CATCATGGCAGGAAGTTGGAGCAGGACACGCAGGGTGATT	53	1	15	1
12-qE-23911.1	Eutherian	13-qB1-1517.1	Murine-specific	chr12:98395346-98395374:-	TATCATGGCAGGAATTAGGTGGCAGAAC	chr13:53400157-53400197:-	CATCATGGCAGGAAGTTGGAGCAGGACACGCAGGGTGATT	290	1	15	1
12-qE-23911.1	Eutherian	13-qB1-1517.1	Murine-specific	chr12:98395348-98395374:-	TATCATGGCAGGAATTAGGTGGCAGA	chr13:53400157-53400197:-	CATCATGGCAGGAAGTTGGAGCAGGACACGCAGGGTGATT	130	1	15	1
2-qE1-35981.1	Eutherian	9-qC-31469.1	Murine-specific	chr2:92580740-92580769:+	CTGTAGACCAGGCTGGCCTTGAACTTACC	chr9:67705811-67705851:+	CTGTAGACCAGGCTGGCCTCAAATTCTGAGATCCACCTGC	47	1	16	1
9-qC-10667.1	Eutherian	2-qE1-35981.1	Eutherian	chr9:67738763-67738789:+	TAAGCACTCTACGACTGAGCCACATC	chr2:92592908-92592948:-	CAAGCACTCTACCACTGAACTACATCTCCAGCCCTTATAC	113	1	16	1
9-qC-10667.1	Eutherian	2-qE1-35981.1	Eutherian	chr9:67738763-67738790:+	TAAGCACTCTACGACTGAGCCACATCC	chr2:92592908-92592948:-	CAAGCACTCTACCACTGAACTACATCTCCAGCCCTTATAC	295	1	16	1
9-qC-10667.1	Eutherian	2-qE1-35981.1	Eutherian	chr9:67738763-67738791:+	TAAGCACTCTACGACTGAGCCACATCCT	chr2:92592908-92592948:-	CAAGCACTCTACCACTGAACTACATCTCCAGCCCTTATAC	49	1	16	1
9-qC-10667.1	Eutherian	2-qE1-35981.1	Eutherian	chr9:67738763-67738791:+	TAAGCACTCTACGACTGAGCCACATCCC	chr2:92592908-92592948:-	CAAGCACTCTACCACTGAACTACATCTCCAGCCCTTATAC	537	1	16	1
9-qC-10667.1	Eutherian	2-qE1-35981.1	Eutherian	chr9:67738763-67738792:+	TAAGCACTCTACGACTGAGCCACATCCCC	chr2:92592908-92592948:-	CAAGCACTCTACCACTGAACTACATCTCCAGCCCTTATAC	615	1	16	1
9-qC-10667.1	Eutherian	2-qE1-35981.1	Eutherian	chr9:67738763-67738793:+	TAAGCACTCTACGACTGAGCCACATCCCCT	chr2:92592908-92592948:-	CAAGCACTCTACCACTGAACTACATCTCCAGCCCTTATAC	34	1	16	1
9-qC-10667.1	Eutherian	2-qE1-35981.1	Eutherian	chr9:67738763-67738793:+	TAAGCACTCTACGACTGAGCCACATCCCCA	chr2:92592908-92592948:-	CAAGCACTCTACCACTGAACTACATCTCCAGCCCTTATAC	89	1	16	1
9-qC-10667.1	Eutherian	2-qE1-35981.1	Eutherian	chr9:67738763-67738794:+	TAAGCACTCTACGACTGAGCCACATCCCCAG	chr2:92592908-92592948:-	CAAGCACTCTACCACTGAACTACATCTCCAGCCCTTATAC	225	1	16	1
7-qD1-16444.1	Eutherian	7-qD2-24830.1	Eutherian	chr7:69924012-69924038:+	GACACTGTAAATTCCTTGAGGGCAGG	chr7:73812214-73812254:+	GACACTGTAAATTCCCTGTGGGCATGGATTGTGTTTTATG	39	1	14	1
7-qD1-16444.1	Eutherian	7-qD2-24830.1	Eutherian	chr7:69924012-69924041:+	GACACTGTAAATTCCTTGAGGGCAGGGGT	chr7:73812214-73812254:+	GACACTGTAAATTCCCTGTGGGCATGGATTGTGTTTTATG	221	1	14	1
7-qD1-16444.1	Eutherian	7-qD2-24830.1	Eutherian	chr7:69924012-69924042:+	GACACTGTAAATTCCTTGAGGGCAGGGGTT	chr7:73812214-73812254:+	GACACTGTAAATTCCCTGTGGGCATGGATTGTGTTTTATG	45	1	14	1
7-qD2-11976.1	Eutherian	18-qE1-36451.1	Eutherian	chr7:73825710-73825734:+	TAAAGATGGAACCTGACCAAAGAC	chr18:67044755-67044795:+	GAAAGATGGAACAAAACCAAATACATAGCAAAGAAAATTA	59	1	45	1
7-qD2-11976.1	Eutherian	18-qE1-36451.1	Eutherian	chr7:73825710-73825735:+	TAAAGATGGAACCTGACCAAAGACA	chr18:67044755-67044795:+	GAAAGATGGAACAAAACCAAATACATAGCAAAGAAAATTA	117	1	45	1
7-qD2-11976.1	Eutherian	18-qE1-36451.1	Eutherian	chr7:73825710-73825736:+	TAAAGATGGAACCTGACCAAAGACAA	chr18:67044755-67044795:+	GAAAGATGGAACAAAACCAAATACATAGCAAAGAAAATTA	47	1	45	1
7-qD2-11976.1	Eutherian	18-qE1-36451.1	Eutherian	chr7:73825710-73825736:+	TAAAGATGGAACCTGACCAAAGACAG	chr18:67044755-67044795:+	GAAAGATGGAACAAAACCAAATACATAGCAAAGAAAATTA	543	1	45	1
7-qD2-11976.1	Eutherian	18-qE1-36451.1	Eutherian	chr7:73825710-73825737:+	TAAAGATGGAACCTGACCAAAGACAGT	chr18:67044755-67044795:+	GAAAGATGGAACAAAACCAAATACATAGCAAAGAAAATTA	70	1	45	1
7-qD2-11976.1	Eutherian	18-qE1-36451.1	Eutherian	chr7:73825710-73825739:+	TAAAGATGGAACCTGACCAAAGACAGGGC	chr18:67044755-67044795:+	GAAAGATGGAACAAAACCAAATACATAGCAAAGAAAATTA	136	1	45	1
7-qD2-11976.1	Eutherian	18-qE1-36451.1	Eutherian	chr7:73825710-73825740:+	TAAAGATGGAACCTGACCAAAGACAGGGCA	chr18:67044755-67044795:+	GAAAGATGGAACAAAACCAAATACATAGCAAAGAAAATTA	123	1	45	1
7-qD2-11976.1	Eutherian	18-qE1-36451.1	Eutherian	chr7:73825710-73825740:+	TAAAGATGGAACCTGACCAAAGACAGGGCT	chr18:67044755-67044795:+	GAAAGATGGAACAAAACCAAATACATAGCAAAGAAAATTA	49	1	45	1
7-qD2-11976.1	Eutherian	18-qE1-36451.1	Eutherian	chr7:73825710-73825741:+	TAAAGATGGAACCTGACCAAAGACAGGGCAC	chr18:67044755-67044795:+	GAAAGATGGAACAAAACCAAATACATAGCAAAGAAAATTA	45	1	45	1
7-qD2-11976.1	Eutherian	18-qE1-36451.1	Eutherian	chr7:73825710-73825742:+	TAAAGATGGAACCTGACCAAAGACAGGGCACT	chr18:67044755-67044795:+	GAAAGATGGAACAAAACCAAATACATAGCAAAGAAAATTA	44	1	45	1
17-qA3.3-26735.1	Eutherian	17-qA3.3-27363.1	Eutherian	chr17:27338500-27338528:+	TTATGATTAAATTTGTTTCTCAAGGATC	chr17:27292197-27292237:+	TTATGATTAAATCTGTTTCTCAAGGTCTGGGCTAGGCCCC	118	1	17	1
17-qA3.3-26735.1	Eutherian	17-qA3.3-27363.1	Eutherian	chr17:27338500-27338529:+	TTATGATTAAATTTGTTTCTCAAGGATCT	chr17:27292197-27292237:+	TTATGATTAAATCTGTTTCTCAAGGTCTGGGCTAGGCCCC	134	1	17	1
17-qA3.3-26735.1	Eutherian	17-qA3.3-27363.1	Eutherian	chr17:27338500-27338529:+	TTATGATTAAATTTGTTTCTCAAGGATCG	chr17:27292197-27292237:+	TTATGATTAAATCTGTTTCTCAAGGTCTGGGCTAGGCCCC	325	1	17	1
17-qA3.3-26735.1	Eutherian	17-qA3.3-27363.1	Eutherian	chr17:27338500-27338530:+	TTATGATTAAATTTGTTTCTCAAGGATCGA	chr17:27292197-27292237:+	TTATGATTAAATCTGTTTCTCAAGGTCTGGGCTAGGCCCC	46	1	17	1
6-qF3-28913.1	Murine-specific	4-qB3-639.1	Mouse-specific	chr6:127800725-127800754:+	CACAAAGCTAACAAGAGACAGACCTGGAC	chr4:62221891-62221931:+	CACAAAGCTAACAGCAGGCAAGTCCCAGATAACCTCCTGT	249	1	25	1
6-qF3-28913.1	Murine-specific	4-qB3-639.1	Mouse-specific	chr6:127800725-127800755:+	CACAAAGCTAACAAGAGACAGACCTGGACT	chr4:62221891-62221931:+	CACAAAGCTAACAGCAGGCAAGTCCCAGATAACCTCCTGT	125	1	25	1
2-qF1-2536.1	Murine-specific	7-qD2-24830.1	Eutherian	chr2:127691987-127692017:+	TACAGAGTAAGGCCCTGTCTCAAAAAAGAA	chr7:73777362-73777402:+	TACAGAGCAAGACTTTGTCTCAACAAACAGAAAAGCACCC	37	1	22	1
5-qF-14508.1	Eutherian	8-qC5-2209.1	Mouse-specific	chr5:113321645-113321675:-	TTCAGCTGAATTTCCTGCTTGCTGGGGTCT	chr8:93411865-93411905:+	TTCAGCTGAATTTCCTCCTTTTGGGAATGGAGACCCCTAG	57	1	18	1
5-qF-14508.1	Eutherian	8-qC5-2209.1	Mouse-specific	chr5:113321646-113321675:-	TTCAGCTGAATTTCCTGCTTGCTGGGGTC	chr8:93411865-93411905:+	TTCAGCTGAATTTCCTCCTTTTGGGAATGGAGACCCCTAG	85	1	18	1
12-qE-23911.1	Eutherian	9-qC-10667.1	Eutherian	chr12:98412442-98412472:-	TTGAACTCAGAAATCCATTTGCCTCTGCCT	chr9:67742098-67742138:-	TTGAACTCAGAAATCTGCCTGCCTCTGTGTCCCAAGTGCT	414	6	18	1
17-qA3.3-27363.1	Eutherian	9-qC-10667.1	Eutherian	chr17:27292987-27293017:-	TTGAACTCATATATCTACCTGCTTCTGCCT	chr9:67742098-67742138:-	TTGAACTCAGAAATCTGCCTGCCTCTGTGTCCCAAGTGCT	1084	1	18	1
17-qA3.3-27363.1	Eutherian	9-qC-10667.1	Eutherian	chr17:27292988-27293017:-	TTGAACTCATATATCTACCTGCTTCTGCC	chr9:67742098-67742138:-	TTGAACTCAGAAATCTGCCTGCCTCTGTGTCCCAAGTGCT	118	1	18	1
17-qA3.3-27363.1	Eutherian	9-qC-10667.1	Eutherian	chr17:27292988-27293017:-	TTGAACTCATATATCTACCTGCTTCTGCT	chr9:67742098-67742138:-	TTGAACTCAGAAATCTGCCTGCCTCTGTGTCCCAAGTGCT	34	1	18	1
17-qA3.3-27363.1	Eutherian	9-qC-10667.1	Eutherian	chr17:27292989-27293017:-	TTGAACTCATATATCTACCTGCTTCTGC	chr9:67742098-67742138:-	TTGAACTCAGAAATCTGCCTGCCTCTGTGTCCCAAGTGCT	34	1	18	1
17-qA3.3-27363.1	Eutherian	9-qC-10667.1	Eutherian	chr17:27292991-27293017:-	TTGAACTCATATATCTACCTGCTTCT	chr9:67742098-67742138:-	TTGAACTCAGAAATCTGCCTGCCTCTGTGTCCCAAGTGCT	53	1	18	1
17-qA3.3-27363.1	Eutherian	10-qB4-6488.1	Murine-specific	chr17:27305782-27305813:-	TGACCTTGAACTCCCAAGTCTCTTCCCCTCT	chr10:62668494-62668534:-	CGACCTTGAACTTCTGATTCTCCACTGTCTGTCTCAAGTG	81	1	39	1
17-qA3.3-27363.1	Eutherian	10-qB4-6488.1	Murine-specific	chr17:27305784-27305813:-	TGACCTTGAACTCCCAAGTCTCTTCCCCT	chr10:62668494-62668534:-	CGACCTTGAACTTCTGATTCTCCACTGTCTGTCTCAAGTG	178	1	39	1
17-qA3.3-27363.1	Eutherian	10-qB4-6488.1	Murine-specific	chr17:27305785-27305813:-	TGACCTTGAACTCCCAAGTCTCTTCCCC	chr10:62668494-62668534:-	CGACCTTGAACTTCTGATTCTCCACTGTCTGTCTCAAGTG	149	1	39	1
17-qA3.3-27363.1	Eutherian	10-qB4-6488.1	Murine-specific	chr17:27305785-27305813:-	TGACCTTGAACTCCCAAGTCTCTTCCCT	chr10:62668494-62668534:-	CGACCTTGAACTTCTGATTCTCCACTGTCTGTCTCAAGTG	82	1	39	1
17-qA3.3-27363.1	Eutherian	10-qB4-6488.1	Murine-specific	chr17:27305786-27305813:-	TGACCTTGAACTCCCAAGTCTCTTCCC	chr10:62668494-62668534:-	CGACCTTGAACTTCTGATTCTCCACTGTCTGTCTCAAGTG	142	1	39	1
17-qA3.3-27363.1	Eutherian	10-qB4-6488.1	Murine-specific	chr17:27305786-27305813:-	TGACCTTGAACTCCCAAGTCTCTTCCT	chr10:62668494-62668534:-	CGACCTTGAACTTCTGATTCTCCACTGTCTGTCTCAAGTG	93	1	39	1
17-qA3.3-27363.1	Eutherian	10-qB4-6488.1	Murine-specific	chr17:27305787-27305813:-	TGACCTTGAACTCCCAAGTCTCTTCC	chr10:62668494-62668534:-	CGACCTTGAACTTCTGATTCTCCACTGTCTGTCTCAAGTG	129	1	39	1
17-qA3.3-27363.1	Eutherian	10-qB4-6488.1	Murine-specific	chr17:27305787-27305813:-	TGACCTTGAACTCCCAAGTCTCTTCT	chr10:62668494-62668534:-	CGACCTTGAACTTCTGATTCTCCACTGTCTGTCTCAAGTG	85	1	39	1
17-qA3.3-27363.1	Eutherian	10-qB4-6488.1	Murine-specific	chr17:27305788-27305813:-	TGACCTTGAACTCCCAAGTCTCTTC	chr10:62668494-62668534:-	CGACCTTGAACTTCTGATTCTCCACTGTCTGTCTCAAGTG	35	1	39	1
5-qG2-2301.1	Mouse-specific	10-qB4-6488.1	Murine-specific	chr5:143764324-143764352:+	TGACCTTGAACTTGTGATTCTCCTGCGT	chr10:62668494-62668534:-	CGACCTTGAACTTCTGATTCTCCACTGTCTGTCTCAAGTG	96	1	39	1
5-qG2-2301.1	Mouse-specific	10-qB4-6488.1	Murine-specific	chr5:143764324-143764353:+	TGACCTTGAACTTGTGATTCTCCTGCGTC	chr10:62668494-62668534:-	CGACCTTGAACTTCTGATTCTCCACTGTCTGTCTCAAGTG	171	1	39	1
5-qG2-2301.1	Mouse-specific	10-qB4-6488.1	Murine-specific	chr5:143764324-143764354:+	TGACCTTGAACTTGTGATTCTCCTGCGTCT	chr10:62668494-62668534:-	CGACCTTGAACTTCTGATTCTCCACTGTCTGTCTCAAGTG	31	1	39	1
17-qA3.3-27363.1	Eutherian	2-qE1-35981.1	Eutherian	chr17:27295549-27295576:-	TGAAATCTCAGTTCCTTGAGCACTGGA	chr2:92578836-92578876:-	AGAAATCCCAAGTCCTTGAGTATCCAGATCACCTAAAGCA	56	1	48	1
17-qA3.3-27363.1	Eutherian	2-qE1-35981.1	Eutherian	chr17:27295550-27295576:-	TGAAATCTCAGTTCCTTGAGCACTGG	chr2:92578836-92578876:-	AGAAATCCCAAGTCCTTGAGTATCCAGATCACCTAAAGCA	91	1	48	1
17-qA3.3-27363.1	Eutherian	2-qE1-35981.1	Eutherian	chr17:27295551-27295576:-	TGAAATCTCAGTTCCTTGAGCACTG	chr2:92578836-92578876:-	AGAAATCCCAAGTCCTTGAGTATCCAGATCACCTAAAGCA	262	1	48	1
17-qA3.3-27363.1	Eutherian	17-qA3.3-26735.1	Eutherian	chr17:27292322-27292351:-	TTTCAGAACAAAGGTACGGTTGCAAGATG	chr17:27339073-27339113:-	TTTCAGAACAAAGGTAGGGTTGCAAGATGGTTATAAACAA	32	1	24	1
17-qA3.3-27363.1	Eutherian	17-qA3.3-26735.1	Eutherian	chr17:27292323-27292351:-	TTTCAGAACAAAGGTACGGTTGCAAGAT	chr17:27339073-27339113:-	TTTCAGAACAAAGGTAGGGTTGCAAGATGGTTATAAACAA	106	1	24	1
17-qA3.3-27363.1	Eutherian	17-qA3.3-26735.1	Eutherian	chr17:27292324-27292351:-	TTTCAGAACAAAGGTACGGTTGCAAGA	chr17:27339073-27339113:-	TTTCAGAACAAAGGTAGGGTTGCAAGATGGTTATAAACAA	46	1	24	1
17-qA3.3-27363.1	Eutherian	17-qA3.3-26735.1	Eutherian	chr17:27292327-27292351:-	TTTCAGAACAAAGGTACGGTTGCT	chr17:27339073-27339113:-	TTTCAGAACAAAGGTAGGGTTGCAAGATGGTTATAAACAA	61	1	24	1
15-qD1-4001.1	Murine-specific	4-qB3-3994.1	Murine-specific	chr15:59280770-59280799:+	TGCTTTCTTTTTTGTTTTGTGTTTTTGGT	chr4:57358715-57358755:+	TGCTTTCTTTCTTGTATTGCTTTCCGGTCTGCCAGTCTCA	44	1	14	1
17-qA3.3-27363.1	Eutherian	2-qE1-35981.1	Eutherian	chr17:27297501-27297531:-	TCATCCTGTAAGCTCTAAGGCCTGAGTTCA	chr2:92541352-92541392:-	ACATCCTGTAATCTCTTAAGAGAGTTCATTTGTACTTTTA	34	1	32	1
17-qA3.3-27363.1	Eutherian	2-qE1-35981.1	Eutherian	chr17:27297504-27297531:-	TCATCCTGTAAGCTCTAAGGCCTGAGT	chr2:92541352-92541392:-	ACATCCTGTAATCTCTTAAGAGAGTTCATTTGTACTTTTA	53	1	32	1
11-qE1-9443.1	Murine-specific	17-qA3.3-27363.1	Eutherian	chr11:103442403-103442430:+	TATTGTAGAAAGGCAGAAGGAAAGAGA	chr17:27306641-27306681:+	TATTGTAGAAAGGCAGGGGGAAAGAGAAAAGGTAAAGAGA	138	3	20	1
11-qE1-9443.1	Murine-specific	17-qA3.3-27363.1	Eutherian	chr11:103442403-103442431:+	TATTGTAGAAAGGCAGAAGGAAAGAGAG	chr17:27306641-27306681:+	TATTGTAGAAAGGCAGGGGGAAAGAGAAAAGGTAAAGAGA	207	1	20	1
11-qE1-9443.1	Murine-specific	17-qA3.3-27363.1	Eutherian	chr11:103442403-103442432:+	TATTGTAGAAAGGCAGAAGGAAAGAGAGT	chr17:27306641-27306681:+	TATTGTAGAAAGGCAGGGGGAAAGAGAAAAGGTAAAGAGA	82	1	20	1
11-qE1-9443.1	Murine-specific	17-qA3.3-27363.1	Eutherian	chr11:103442403-103442432:+	TATTGTAGAAAGGCAGAAGGAAAGAGAGA	chr17:27306641-27306681:+	TATTGTAGAAAGGCAGGGGGAAAGAGAAAAGGTAAAGAGA	881	1	20	1
11-qE1-9443.1	Murine-specific	17-qA3.3-27363.1	Eutherian	chr11:103442403-103442433:+	TATTGTAGAAAGGCAGAAGGAAAGAGAGAA	chr17:27306641-27306681:+	TATTGTAGAAAGGCAGGGGGAAAGAGAAAAGGTAAAGAGA	131	1	20	1
17-qA3.3-27363.1	Eutherian	17-qA3.3-27363.1	Eutherian	chr17:27291013-27291041:-	TATTGTAGAAAGCAGGGGGAATAGAGAA	chr17:27306641-27306681:+	TATTGTAGAAAGGCAGGGGGAAAGAGAAAAGGTAAAGAGA	167	1	20	1
17-qA3.3-27363.1	Eutherian	17-qA3.3-27363.1	Eutherian	chr17:27291014-27291041:-	TATTGTAGAAAGCAGGGGGAATAGAGA	chr17:27306641-27306681:+	TATTGTAGAAAGGCAGGGGGAAAGAGAAAAGGTAAAGAGA	101	1	20	1
7-qD2-24830.1	Eutherian	6-qD1-2831.1	Murine-specific	chr7:73804943-73804973:-	AACTTGACTACATCTGGAATTAACTAAAAC	chr6:87965800-87965840:+	AACTTGACTGCATCTGGAATTCACTAAAACCCAAATGGCT	2301	61	25	1
11-qE1-9443.1	Murine-specific	14-qA3-2286.1	Mouse-specific	chr11:103449075-103449104:+	TTAATAGTGTCAGGAGTTGGCTTTTTCCC	chr14:24362477-24362517:+	TTAATAGTGTCAGGGATTGGTGCTTGCCCATGGGATGGGC	70	1	18	1
15-qD1-4001.1	Murine-specific	6-qF3-28913.1	Murine-specific	chr15:59289704-59289731:+	TTGCTAGGTAACTGGGAGGAGTCTAGA	chr6:127810683-127810723:-	TTGCTAGGTAACTGGGAGGAGTCTAGCCTGAAGGTCAGAA	138	2	20	1
15-qD1-4001.1	Murine-specific	6-qF3-28913.1	Murine-specific	chr15:59289704-59289733:+	TTGCTAGGTAACTGGGAGGAGTCTAGACT	chr6:127810683-127810723:-	TTGCTAGGTAACTGGGAGGAGTCTAGCCTGAAGGTCAGAA	1181	2	20	1
2-qE1-35981.1	Eutherian	7-qD2-11976.1	Eutherian	chr2:92578057-92578085:+	TTGTATCAAACATTTGTTTGCTGACACG	chr7:73823831-73823871:-	TTGTATCAAATATTTGTAAGCAGTCAAGAAATATGGATGC	38	1	44	1
10-qB4-6488.1	Murine-specific	9-qA5.3-24188.1	Eutherian	chr10:62678240-62678270:+	TGAGTTCGAGCCCAGCCTGGTCTACCGAGT	chr9:54230026-54230066:+	TGAGTTCAAGGTCAGCCTGGTCTACAAAGCAATCCTATGC	59	1	84	1
9-qA5.3-1495.1	Murine-specific	9-qA5.3-24188.1	Eutherian	chr9:54250024-54250054:+	TGAGTTCAAGGTCAGACAGAGTTCCAGGAC	chr9:54230026-54230066:+	TGAGTTCAAGGTCAGCCTGGTCTACAAAGCAATCCTATGC	58	1	84	1
9-qC-10667.1	Eutherian	9-qA5.3-24188.1	Eutherian	chr9:67742129-67742157:+	TGAGTTCAAGGACAGCCTGGTCTAAAAG	chr9:54230026-54230066:+	TGAGTTCAAGGTCAGCCTGGTCTACAAAGCAATCCTATGC	41	1	84	1
9-qC-10667.1	Eutherian	9-qA5.3-24188.1	Eutherian	chr9:67742129-67742158:+	TGAGTTCAAGGACAGCCTGGTCTAAAAGT	chr9:54230026-54230066:+	TGAGTTCAAGGTCAGCCTGGTCTACAAAGCAATCCTATGC	86	1	84	1
14-qA3-19970.1	Murine-specific	9-qF4-150.1	Murine-specific	chr14:24116991-24117022:+	TGTGATAAAATATCATGACCTAGAGAAACTC	chr9:122783400-122783440:+	AGTGATAAAACACCATAACCAAAACCAACCTGGGCAACAG	119	1	23	1
9-qA5.3-24188.1	Eutherian	9-qF4-150.1	Murine-specific	chr9:54214513-54214543:-	TGTGATAAAATATCATGACCAGAAGCAACT	chr9:122783400-122783440:+	AGTGATAAAACACCATAACCAAAACCAACCTGGGCAACAG	135	1	23	1
pi-1700006A11Rik.1	Murine-specific	3-qA2-617.1	Mouse-specific	chr3:124412464-124412494:-	TGACAATGTGTGTATAACCCCATCCCCATC	chr3:20463954-20463994:+	AGACAATGTGCATATAACCCCACCACCACCAAATAAGTAA	122	1	57	1
pi-1700006A11Rik.1	Murine-specific	3-qA2-617.1	Mouse-specific	chr3:124412464-124412494:-	TGACAATGTGTGTATAACCCCATCCCCATT	chr3:20463954-20463994:+	AGACAATGTGCATATAACCCCACCACCACCAAATAAGTAA	35	1	57	1
pi-1700006A11Rik.1	Murine-specific	3-qA2-617.1	Mouse-specific	chr3:124412465-124412494:-	TGACAATGTGTGTATAACCCCATCCCCAT	chr3:20463954-20463994:+	AGACAATGTGCATATAACCCCACCACCACCAAATAAGTAA	191	1	57	1
pi-1700006A11Rik.1	Murine-specific	3-qA2-617.1	Mouse-specific	chr3:124412467-124412494:-	TGACAATGTGTGTATAACCCCATCCCC	chr3:20463954-20463994:+	AGACAATGTGCATATAACCCCACCACCACCAAATAAGTAA	36	1	57	1
pi-1700006A11Rik.1	Murine-specific	3-qA2-617.1	Mouse-specific	chr3:124412467-124412494:-	TGACAATGTGTGTATAACCCCATCCCT	chr3:20463954-20463994:+	AGACAATGTGCATATAACCCCACCACCACCAAATAAGTAA	36	1	57	1
pi-1700006A11Rik.1	Murine-specific	3-qA2-617.1	Mouse-specific	chr3:124412468-124412494:-	TGACAATGTGTGTATAACCCCATCCC	chr3:20463954-20463994:+	AGACAATGTGCATATAACCCCACCACCACCAAATAAGTAA	54	1	57	1
14-qA3-19970.1	Murine-specific	12-qE-7089.1	Eutherian	chr14:24116988-24117017:+	TGCTGTGATAAAATATCATGACCTAGAGA	chr12:98454712-98454752:-	TGCTGTGATAAAACACCACGAACAAAAAACAACTTGGGGA	263	1	34	1
14-qA3-19970.1	Murine-specific	12-qE-7089.1	Eutherian	chr14:24116988-24117018:+	TGCTGTGATAAAATATCATGACCTAGAGAA	chr12:98454712-98454752:-	TGCTGTGATAAAACACCACGAACAAAAAACAACTTGGGGA	259	1	34	1
2-qE1-35981.1	Eutherian	12-qE-7089.1	Eutherian	chr2:92587221-92587249:+	TGCTGTGATAAAACCTCATGACCAGAAG	chr12:98454712-98454752:-	TGCTGTGATAAAACACCACGAACAAAAAACAACTTGGGGA	70	2	34	1
2-qE1-35981.1	Eutherian	12-qE-7089.1	Eutherian	chr2:92587221-92587250:+	TGCTGTGATAAAACCTCATGACCAGAAGC	chr12:98454712-98454752:-	TGCTGTGATAAAACACCACGAACAAAAAACAACTTGGGGA	100	1	34	1
2-qE1-35981.1	Eutherian	12-qE-7089.1	Eutherian	chr2:92587221-92587251:+	TGCTGTGATAAAACCTCATGACCAGAAGCT	chr12:98454712-98454752:-	TGCTGTGATAAAACACCACGAACAAAAAACAACTTGGGGA	172	1	34	1
6-qF3-28913.1	Murine-specific	15-qD1-17920.1	Eutherian	chr6:127800916-127800942:+	TCTGACTGTTCCTCTTCGTTCCTCCT	chr15:59275019-59275059:+	GCTGACTGGTCCTATTTGCTCCTCTCTGCTATATTAGCCC	47	1	24	1
6-qF3-28913.1	Murine-specific	15-qD1-17920.1	Eutherian	chr6:127800916-127800945:+	TCTGACTGTTCCTCTTCGTTCCTCCTGTT	chr15:59275019-59275059:+	GCTGACTGGTCCTATTTGCTCCTCTCTGCTATATTAGCCC	39	1	24	1
6-qF3-28913.1	Murine-specific	15-qD1-17920.1	Eutherian	chr6:127800916-127800945:+	TCTGACTGTTCCTCTTCGTTCCTCCTGTC	chr15:59275019-59275059:+	GCTGACTGGTCCTATTTGCTCCTCTCTGCTATATTAGCCC	91	1	24	1
18-qE1-1295.1	Mouse-specific	4-qC5-17839.1	Eutherian	chr18:67072317-67072347:+	TATGAACTAATCAGTACCCCCCGAGCTTGT	chr4:94307548-94307588:+	TATGAACTAACCAGTACCCCGGAGCTCTTGTCTCTAGCTG	95	2	29	1
9-qA5.3-24188.1	Eutherian	4-qC5-17839.1	Eutherian	chr9:54207400-54207431:-	TATGAACTAACCAGCACCCCCAGACCTCGTG	chr4:94307548-94307588:+	TATGAACTAACCAGTACCCCGGAGCTCTTGTCTCTAGCTG	47	1	29	1
9-qA5.3-24188.1	Eutherian	4-qC5-17839.1	Eutherian	chr9:54207401-54207431:-	TATGAACTAACCAGCACCCCCAGACCTCGT	chr4:94307548-94307588:+	TATGAACTAACCAGTACCCCGGAGCTCTTGTCTCTAGCTG	120	1	29	1
9-qA5.3-24188.1	Eutherian	4-qC5-17839.1	Eutherian	chr9:54207402-54207431:-	TATGAACTAACCAGCACCCCCAGACCTCG	chr4:94307548-94307588:+	TATGAACTAACCAGTACCCCGGAGCTCTTGTCTCTAGCTG	47	1	29	1
17-qA3.3-27363.1	Eutherian	17-qA3.3-26735.1	Eutherian	chr17:27292154-27292184:-	TAGTTTGTCTTTACTATAAGATGGCTGTCT	chr17:27338447-27338487:-	TAGTTTGTCTTTGCTATAAGATGGCCTTAACCCTAAGATG	51	1	42	1
17-qA3.3-27363.1	Eutherian	17-qA3.3-26735.1	Eutherian	chr17:27292155-27292184:-	TAGTTTGTCTTTACTATAAGATGGCTGTC	chr17:27338447-27338487:-	TAGTTTGTCTTTGCTATAAGATGGCCTTAACCCTAAGATG	308	1	42	1
10-qB4-6488.1	Murine-specific	5-qG2-2301.1	Mouse-specific	chr10:62676286-62676316:+	TTTAATCCCAGTTCTCGGGAGTTTGAGAGC	chr5:143765315-143765355:-	TTTAATCCCAGCACTCGGGAGGCAGAGGCAGGCGGATTTC	40	1	74	1
10-qB4-6488.1	Murine-specific	5-qG2-2301.1	Mouse-specific	chr10:62688647-62688673:+	TTTAATCTTAGCACTGGGGAGACTGA	chr5:143765315-143765355:-	TTTAATCCCAGCACTCGGGAGGCAGAGGCAGGCGGATTTC	42	1	74	1
10-qB4-6488.1	Murine-specific	5-qG2-2301.1	Mouse-specific	chr10:62688647-62688675:+	TTTAATCTTAGCACTGGGGAGACTGAGT	chr5:143765315-143765355:-	TTTAATCCCAGCACTCGGGAGGCAGAGGCAGGCGGATTTC	47	1	74	1
10-qB4-6488.1	Murine-specific	5-qG2-2301.1	Mouse-specific	chr10:62688647-62688675:+	TTTAATCTTAGCACTGGGGAGACTGAGA	chr5:143765315-143765355:-	TTTAATCCCAGCACTCGGGAGGCAGAGGCAGGCGGATTTC	75	1	74	1
10-qB4-6488.1	Murine-specific	5-qG2-2301.1	Mouse-specific	chr10:62688647-62688676:+	TTTAATCTTAGCACTGGGGAGACTGAGAT	chr5:143765315-143765355:-	TTTAATCCCAGCACTCGGGAGGCAGAGGCAGGCGGATTTC	181	1	74	1
11-qE1-9443.1	Murine-specific	5-qG2-2301.1	Mouse-specific	chr11:103447005-103447031:+	TTTAATCCCAGGACCCGGAAAGCAAA	chr5:143765315-143765355:-	TTTAATCCCAGCACTCGGGAGGCAGAGGCAGGCGGATTTC	55	1	74	1
11-qE1-9443.1	Murine-specific	5-qG2-2301.1	Mouse-specific	chr11:103447005-103447032:+	TTTAATCCCAGGACCCGGAAAGCAAAG	chr5:143765315-143765355:-	TTTAATCCCAGCACTCGGGAGGCAGAGGCAGGCGGATTTC	72	1	74	1
11-qE1-9443.1	Murine-specific	5-qG2-2301.1	Mouse-specific	chr11:103447005-103447033:+	TTTAATCCCAGGACCCGGAAAGCAAAGG	chr5:143765315-143765355:-	TTTAATCCCAGCACTCGGGAGGCAGAGGCAGGCGGATTTC	61	1	74	1
11-qE1-9443.1	Murine-specific	5-qG2-2301.1	Mouse-specific	chr11:103447005-103447033:+	TTTAATCCCAGGACCCGGAAAGCAAAGT	chr5:143765315-143765355:-	TTTAATCCCAGCACTCGGGAGGCAGAGGCAGGCGGATTTC	63	1	74	1
11-qE1-9443.1	Murine-specific	5-qG2-2301.1	Mouse-specific	chr11:103447005-103447034:+	TTTAATCCCAGGACCCGGAAAGCAAAGGC	chr5:143765315-143765355:-	TTTAATCCCAGCACTCGGGAGGCAGAGGCAGGCGGATTTC	348	1	74	1
11-qE1-9443.1	Murine-specific	5-qG2-2301.1	Mouse-specific	chr11:103447005-103447035:+	TTTAATCCCAGGACCCGGAAAGCAAAGGCA	chr5:143765315-143765355:-	TTTAATCCCAGCACTCGGGAGGCAGAGGCAGGCGGATTTC	192	1	74	1
11-qE1-9443.1	Murine-specific	5-qG2-2301.1	Mouse-specific	chr11:103447005-103447036:+	TTTAATCCCAGGACCCGGAAAGCAAAGGCAG	chr5:143765315-143765355:-	TTTAATCCCAGCACTCGGGAGGCAGAGGCAGGCGGATTTC	53	1	74	1
11-qE1-9443.1	Murine-specific	5-qG2-2301.1	Mouse-specific	chr11:103447005-103447037:+	TTTAATCCCAGGACCCGGAAAGCAAAGGCAGT	chr5:143765315-143765355:-	TTTAATCCCAGCACTCGGGAGGCAGAGGCAGGCGGATTTC	33	1	74	1
15-qD3-14639.1	Murine-specific	5-qG2-2301.1	Mouse-specific	chr15:74657262-74657288:+	TTTAATCACAGCACTAGGGAAACAGA	chr5:143765315-143765355:-	TTTAATCCCAGCACTCGGGAGGCAGAGGCAGGCGGATTTC	65	2	74	1
15-qD3-14639.1	Murine-specific	5-qG2-2301.1	Mouse-specific	chr15:74657262-74657289:+	TTTAATCACAGCACTAGGGAAACAGAA	chr5:143765315-143765355:-	TTTAATCCCAGCACTCGGGAGGCAGAGGCAGGCGGATTTC	149	1	74	1
15-qD3-14639.1	Murine-specific	5-qG2-2301.1	Mouse-specific	chr15:74657262-74657290:+	TTTAATCACAGCACTAGGGAAACAGAAG	chr5:143765315-143765355:-	TTTAATCCCAGCACTCGGGAGGCAGAGGCAGGCGGATTTC	378	1	74	1
15-qD3-14639.1	Murine-specific	5-qG2-2301.1	Mouse-specific	chr15:74657262-74657291:+	TTTAATCACAGCACTAGGGAAACAGAAGC	chr5:143765315-143765355:-	TTTAATCCCAGCACTCGGGAGGCAGAGGCAGGCGGATTTC	1836	1	74	1
15-qD3-14639.1	Murine-specific	5-qG2-2301.1	Mouse-specific	chr15:74657262-74657291:+	TTTAATCACAGCACTAGGGAAACAGAAGT	chr5:143765315-143765355:-	TTTAATCCCAGCACTCGGGAGGCAGAGGCAGGCGGATTTC	81	1	74	1
15-qD3-14639.1	Murine-specific	5-qG2-2301.1	Mouse-specific	chr15:74657262-74657292:+	TTTAATCACAGCACTAGGGAAACAGAAGCT	chr5:143765315-143765355:-	TTTAATCCCAGCACTCGGGAGGCAGAGGCAGGCGGATTTC	1523	1	74	1
15-qD3-14639.1	Murine-specific	5-qG2-2301.1	Mouse-specific	chr15:74657262-74657293:+	TTTAATCACAGCACTAGGGAAACAGAAGCTT	chr5:143765315-143765355:-	TTTAATCCCAGCACTCGGGAGGCAGAGGCAGGCGGATTTC	195	1	74	1
17-qA3.3-27363.1	Eutherian	5-qG2-2301.1	Mouse-specific	chr17:27297330-27297360:-	TTTAATCCCAGCACTCACGCAGAAAAGGCA	chr5:143765315-143765355:-	TTTAATCCCAGCACTCGGGAGGCAGAGGCAGGCGGATTTC	34	1	74	1
5-qF-14224.1	Eutherian	5-qG2-2301.1	Mouse-specific	chr5:113343582-113343610:+	TTTAATCCCAGCTCTTGGGAGGCGGAGG	chr5:143765315-143765355:-	TTTAATCCCAGCACTCGGGAGGCAGAGGCAGGCGGATTTC	253	4	74	1
5-qF-14224.1	Eutherian	5-qG2-2301.1	Mouse-specific	chr5:113343582-113343611:+	TTTAATCCCAGCTCTTGGGAGGCGGAGGC	chr5:143765315-143765355:-	TTTAATCCCAGCACTCGGGAGGCAGAGGCAGGCGGATTTC	174	4	74	1
9-qA5.3-1495.1	Murine-specific	5-qG2-2301.1	Mouse-specific	chr9:54249982-54250008:+	TTTAATCTCAGCACCGTGGAGGCAGA	chr5:143765315-143765355:-	TTTAATCCCAGCACTCGGGAGGCAGAGGCAGGCGGATTTC	47	1	74	1
9-qA5.3-1495.1	Murine-specific	5-qG2-2301.1	Mouse-specific	chr9:54249982-54250011:+	TTTAATCTCAGCACCGTGGAGGCAGAGGC	chr5:143765315-143765355:-	TTTAATCCCAGCACTCGGGAGGCAGAGGCAGGCGGATTTC	60	1	74	1
9-qA5.3-1495.1	Murine-specific	5-qG2-2301.1	Mouse-specific	chr9:54249982-54250012:+	TTTAATCTCAGCACCGTGGAGGCAGAGGCT	chr5:143765315-143765355:-	TTTAATCCCAGCACTCGGGAGGCAGAGGCAGGCGGATTTC	41	1	74	1
19-qC2-1361.1	Murine-specific	7-qD1-9417.1	Murine-specific	chr19:37259364-37259394:-	TGCAATGGGTGGACATTGAGAATGCTGGGT	chr7:69903315-69903355:+	GGCAATGGAGGGACTCTGAGAATAGGACAAATAGTCTTCC	93	1	36	1
19-qC2-1361.1	Murine-specific	7-qD1-9417.1	Murine-specific	chr19:37259365-37259394:-	TGCAATGGGTGGACATTGAGAATGCTGGG	chr7:69903315-69903355:+	GGCAATGGAGGGACTCTGAGAATAGGACAAATAGTCTTCC	173	1	36	1
19-qC2-1361.1	Murine-specific	7-qD1-9417.1	Murine-specific	chr19:37259365-37259394:-	TGCAATGGGTGGACATTGAGAATGCTGGT	chr7:69903315-69903355:+	GGCAATGGAGGGACTCTGAGAATAGGACAAATAGTCTTCC	43	1	36	1
19-qC2-1361.1	Murine-specific	7-qD1-9417.1	Murine-specific	chr19:37259366-37259394:-	TGCAATGGGTGGACATTGAGAATGCTGG	chr7:69903315-69903355:+	GGCAATGGAGGGACTCTGAGAATAGGACAAATAGTCTTCC	127	1	36	1
19-qC2-1361.1	Murine-specific	7-qD1-9417.1	Murine-specific	chr19:37259368-37259394:-	TGCAATGGGTGGACATTGAGAATGCT	chr7:69903315-69903355:+	GGCAATGGAGGGACTCTGAGAATAGGACAAATAGTCTTCC	119	1	36	1
18-qE1-36451.1	Eutherian	8-qC5-8200.1	Murine-specific	chr18:67055416-67055447:-	TGAAGATTCTGGAAACAGCTCTGCCGCGAGA	chr8:92189555-92189595:-	TGAAGATCCTAGAAACATCTCCCATACTGCCCCGGCTCTG	168	1	170	1
18-qE1-36451.1	Eutherian	8-qC5-8200.1	Murine-specific	chr18:67055416-67055447:-	TGAAGATTCTGGAAACAGCTCTGCCGCGAGT	chr8:92189555-92189595:-	TGAAGATCCTAGAAACATCTCCCATACTGCCCCGGCTCTG	247	1	170	1
18-qE1-36451.1	Eutherian	8-qC5-8200.1	Murine-specific	chr18:67055417-67055447:-	TGAAGATTCTGGAAACAGCTCTGCCGCGAT	chr8:92189555-92189595:-	TGAAGATCCTAGAAACATCTCCCATACTGCCCCGGCTCTG	400	1	170	1
18-qE1-36451.1	Eutherian	8-qC5-8200.1	Murine-specific	chr18:67055417-67055447:-	TGAAGATTCTGGAAACAGCTCTGCCGCGAG	chr8:92189555-92189595:-	TGAAGATCCTAGAAACATCTCCCATACTGCCCCGGCTCTG	97	1	170	1
18-qE1-36451.1	Eutherian	8-qC5-8200.1	Murine-specific	chr18:67055418-67055447:-	TGAAGATTCTGGAAACAGCTCTGCCGCGA	chr8:92189555-92189595:-	TGAAGATCCTAGAAACATCTCCCATACTGCCCCGGCTCTG	3909	1	170	1
18-qE1-36451.1	Eutherian	8-qC5-8200.1	Murine-specific	chr18:67055418-67055447:-	TGAAGATTCTGGAAACAGCTCTGCCGCGT	chr8:92189555-92189595:-	TGAAGATCCTAGAAACATCTCCCATACTGCCCCGGCTCTG	400	1	170	1
18-qE1-36451.1	Eutherian	8-qC5-8200.1	Murine-specific	chr18:67055419-67055447:-	TGAAGATTCTGGAAACAGCTCTGCCGCG	chr8:92189555-92189595:-	TGAAGATCCTAGAAACATCTCCCATACTGCCCCGGCTCTG	148	1	170	1
18-qE1-36451.1	Eutherian	8-qC5-8200.1	Murine-specific	chr18:67055419-67055447:-	TGAAGATTCTGGAAACAGCTCTGCCGCT	chr8:92189555-92189595:-	TGAAGATCCTAGAAACATCTCCCATACTGCCCCGGCTCTG	180	1	170	1
18-qE1-36451.1	Eutherian	8-qC5-8200.1	Murine-specific	chr18:67055420-67055447:-	TGAAGATTCTGGAAACAGCTCTGCCGA	chr8:92189555-92189595:-	TGAAGATCCTAGAAACATCTCCCATACTGCCCCGGCTCTG	37	1	170	1
18-qE1-36451.1	Eutherian	8-qC5-8200.1	Murine-specific	chr18:67055420-67055447:-	TGAAGATTCTGGAAACAGCTCTGCCGC	chr8:92189555-92189595:-	TGAAGATCCTAGAAACATCTCCCATACTGCCCCGGCTCTG	511	1	170	1
18-qE1-36451.1	Eutherian	8-qC5-8200.1	Murine-specific	chr18:67055420-67055447:-	TGAAGATTCTGGAAACAGCTCTGCCGT	chr8:92189555-92189595:-	TGAAGATCCTAGAAACATCTCCCATACTGCCCCGGCTCTG	95	1	170	1
18-qE1-36451.1	Eutherian	8-qC5-8200.1	Murine-specific	chr18:67055421-67055447:-	TGAAGATTCTGGAAACAGCTCTGCCT	chr8:92189555-92189595:-	TGAAGATCCTAGAAACATCTCCCATACTGCCCCGGCTCTG	185	1	170	1
18-qE1-36451.1	Eutherian	8-qC5-8200.1	Murine-specific	chr18:67055421-67055447:-	TGAAGATTCTGGAAACAGCTCTGCCG	chr8:92189555-92189595:-	TGAAGATCCTAGAAACATCTCCCATACTGCCCCGGCTCTG	974	1	170	1
18-qE1-36451.1	Eutherian	8-qC5-8200.1	Murine-specific	chr18:67055422-67055447:-	TGAAGATTCTGGAAACAGCTCTGCC	chr8:92189555-92189595:-	TGAAGATCCTAGAAACATCTCCCATACTGCCCCGGCTCTG	316	1	170	1
5-qF-14508.1	Eutherian	4-qC5-17839.1	Eutherian	chr5:113336278-113336308:-	TTTTATCACAGCAACAGAAAGGAAACTAGG	chr4:94290717-94290757:+	TTTTATCACAGTAGCAGAAATGAAACAAATATAGCCCCTG	223	4	26	1
9-qF4-150.1	Murine-specific	4-qC5-17839.1	Eutherian	chr9:122783381-122783410:-	TTTTATCACTGTAACAGATACCCCACCTA	chr4:94290717-94290757:+	TTTTATCACAGTAGCAGAAATGAAACAAATATAGCCCCTG	37	1	26	1
9-qF4-150.1	Murine-specific	4-qC5-17839.1	Eutherian	chr9:122783382-122783410:-	TTTTATCACTGTAACAGATACCCCACCT	chr4:94290717-94290757:+	TTTTATCACAGTAGCAGAAATGAAACAAATATAGCCCCTG	39	1	26	1
9-qF4-150.1	Murine-specific	4-qC5-17839.1	Eutherian	chr9:122783383-122783410:-	TTTTATCACTGTAACAGATACCCCACC	chr4:94290717-94290757:+	TTTTATCACAGTAGCAGAAATGAAACAAATATAGCCCCTG	31	1	26	1
15-qD1-17920.1	Eutherian	1-qD-2017.1	Murine-specific	chr15:59269197-59269229:-	TGGTTGGAATCCAGTGGGAACGACATCATGCC	chr1:91404947-91404987:+	TGGTTGGAATCCAGCAAGACCCACATCTTGTCTGCTCTTG	38	1	111	1
15-qD1-17920.1	Eutherian	1-qD-2017.1	Murine-specific	chr15:59269204-59269229:-	TGGTTGGAATCCAGTGGGAACGACA	chr1:91404947-91404987:+	TGGTTGGAATCCAGCAAGACCCACATCTTGTCTGCTCTTG	47	1	111	1
9-qA5.3-24188.1	Eutherian	4-qC5-17839.1	Eutherian	chr9:54233600-54233630:-	TGCTTATCTGCAGATGAATCATGACTGAAT	chr4:94318939-94318979:+	TGCTTATCTGCAGAAGAAAACCATGGCCAACAAATGGGGA	49	1	23	1
pi-Tmem194.1	Murine-specific	2-qE1-35981.1	Eutherian	chr10:127698454-127698482:+	TAGCATCCAAAATGTCAGCTGAGACACC	chr2:92562669-92562709:-	GAGCATCTAAAACCTCAGCTGGCAAAGACCATCCTCTTCT	60	1	20	1
pi-Tmem194.1	Murine-specific	2-qE1-35981.1	Eutherian	chr10:127698454-127698483:+	TAGCATCCAAAATGTCAGCTGAGACACCT	chr2:92562669-92562709:-	GAGCATCTAAAACCTCAGCTGGCAAAGACCATCCTCTTCT	33	1	20	1
pi-Tmem194.1	Murine-specific	2-qE1-35981.1	Eutherian	chr10:127698454-127698484:+	TAGCATCCAAAATGTCAGCTGAGACACCTC	chr2:92562669-92562709:-	GAGCATCTAAAACCTCAGCTGGCAAAGACCATCCTCTTCT	323	1	20	1
pi-Tmem194.1	Murine-specific	2-qE1-35981.1	Eutherian	chr10:127698454-127698485:+	TAGCATCCAAAATGTCAGCTGAGACACCTCT	chr2:92562669-92562709:-	GAGCATCTAAAACCTCAGCTGGCAAAGACCATCCTCTTCT	54	1	20	1
10-qB4-6488.1	Murine-specific	2-qE1-35981.1	Eutherian	chr10:62676286-62676316:+	TTTAATCCCAGTTCTCGGGAGTTTGAGAGC	chr2:92580775-92580815:-	TTTAATCCCAGCACTTGGGAAGCAGAGGCAGGTGGATCTC	40	1	53	1
10-qB4-6488.1	Murine-specific	2-qE1-35981.1	Eutherian	chr10:62688647-62688673:+	TTTAATCTTAGCACTGGGGAGACTGA	chr2:92580775-92580815:-	TTTAATCCCAGCACTTGGGAAGCAGAGGCAGGTGGATCTC	42	1	53	1
10-qB4-6488.1	Murine-specific	2-qE1-35981.1	Eutherian	chr10:62688647-62688675:+	TTTAATCTTAGCACTGGGGAGACTGAGT	chr2:92580775-92580815:-	TTTAATCCCAGCACTTGGGAAGCAGAGGCAGGTGGATCTC	47	1	53	1
10-qB4-6488.1	Murine-specific	2-qE1-35981.1	Eutherian	chr10:62688647-62688675:+	TTTAATCTTAGCACTGGGGAGACTGAGA	chr2:92580775-92580815:-	TTTAATCCCAGCACTTGGGAAGCAGAGGCAGGTGGATCTC	75	1	53	1
10-qB4-6488.1	Murine-specific	2-qE1-35981.1	Eutherian	chr10:62688647-62688676:+	TTTAATCTTAGCACTGGGGAGACTGAGAT	chr2:92580775-92580815:-	TTTAATCCCAGCACTTGGGAAGCAGAGGCAGGTGGATCTC	181	1	53	1
11-qE1-9443.1	Murine-specific	2-qE1-35981.1	Eutherian	chr11:103447005-103447031:+	TTTAATCCCAGGACCCGGAAAGCAAA	chr2:92580775-92580815:-	TTTAATCCCAGCACTTGGGAAGCAGAGGCAGGTGGATCTC	55	1	53	1
11-qE1-9443.1	Murine-specific	2-qE1-35981.1	Eutherian	chr11:103447005-103447032:+	TTTAATCCCAGGACCCGGAAAGCAAAG	chr2:92580775-92580815:-	TTTAATCCCAGCACTTGGGAAGCAGAGGCAGGTGGATCTC	72	1	53	1
11-qE1-9443.1	Murine-specific	2-qE1-35981.1	Eutherian	chr11:103447005-103447033:+	TTTAATCCCAGGACCCGGAAAGCAAAGG	chr2:92580775-92580815:-	TTTAATCCCAGCACTTGGGAAGCAGAGGCAGGTGGATCTC	61	1	53	1
11-qE1-9443.1	Murine-specific	2-qE1-35981.1	Eutherian	chr11:103447005-103447033:+	TTTAATCCCAGGACCCGGAAAGCAAAGT	chr2:92580775-92580815:-	TTTAATCCCAGCACTTGGGAAGCAGAGGCAGGTGGATCTC	63	1	53	1
11-qE1-9443.1	Murine-specific	2-qE1-35981.1	Eutherian	chr11:103447005-103447034:+	TTTAATCCCAGGACCCGGAAAGCAAAGGC	chr2:92580775-92580815:-	TTTAATCCCAGCACTTGGGAAGCAGAGGCAGGTGGATCTC	348	1	53	1
11-qE1-9443.1	Murine-specific	2-qE1-35981.1	Eutherian	chr11:103447005-103447035:+	TTTAATCCCAGGACCCGGAAAGCAAAGGCA	chr2:92580775-92580815:-	TTTAATCCCAGCACTTGGGAAGCAGAGGCAGGTGGATCTC	192	1	53	1
11-qE1-9443.1	Murine-specific	2-qE1-35981.1	Eutherian	chr11:103447005-103447036:+	TTTAATCCCAGGACCCGGAAAGCAAAGGCAG	chr2:92580775-92580815:-	TTTAATCCCAGCACTTGGGAAGCAGAGGCAGGTGGATCTC	53	1	53	1
11-qE1-9443.1	Murine-specific	2-qE1-35981.1	Eutherian	chr11:103447005-103447037:+	TTTAATCCCAGGACCCGGAAAGCAAAGGCAGT	chr2:92580775-92580815:-	TTTAATCCCAGCACTTGGGAAGCAGAGGCAGGTGGATCTC	33	1	53	1
15-qD3-14639.1	Murine-specific	2-qE1-35981.1	Eutherian	chr15:74657262-74657288:+	TTTAATCACAGCACTAGGGAAACAGA	chr2:92580775-92580815:-	TTTAATCCCAGCACTTGGGAAGCAGAGGCAGGTGGATCTC	65	2	53	1
15-qD3-14639.1	Murine-specific	2-qE1-35981.1	Eutherian	chr15:74657262-74657289:+	TTTAATCACAGCACTAGGGAAACAGAA	chr2:92580775-92580815:-	TTTAATCCCAGCACTTGGGAAGCAGAGGCAGGTGGATCTC	149	1	53	1
15-qD3-14639.1	Murine-specific	2-qE1-35981.1	Eutherian	chr15:74657262-74657290:+	TTTAATCACAGCACTAGGGAAACAGAAG	chr2:92580775-92580815:-	TTTAATCCCAGCACTTGGGAAGCAGAGGCAGGTGGATCTC	378	1	53	1
15-qD3-14639.1	Murine-specific	2-qE1-35981.1	Eutherian	chr15:74657262-74657291:+	TTTAATCACAGCACTAGGGAAACAGAAGC	chr2:92580775-92580815:-	TTTAATCCCAGCACTTGGGAAGCAGAGGCAGGTGGATCTC	1836	1	53	1
15-qD3-14639.1	Murine-specific	2-qE1-35981.1	Eutherian	chr15:74657262-74657291:+	TTTAATCACAGCACTAGGGAAACAGAAGT	chr2:92580775-92580815:-	TTTAATCCCAGCACTTGGGAAGCAGAGGCAGGTGGATCTC	81	1	53	1
15-qD3-14639.1	Murine-specific	2-qE1-35981.1	Eutherian	chr15:74657262-74657292:+	TTTAATCACAGCACTAGGGAAACAGAAGCT	chr2:92580775-92580815:-	TTTAATCCCAGCACTTGGGAAGCAGAGGCAGGTGGATCTC	1523	1	53	1
15-qD3-14639.1	Murine-specific	2-qE1-35981.1	Eutherian	chr15:74657262-74657293:+	TTTAATCACAGCACTAGGGAAACAGAAGCTT	chr2:92580775-92580815:-	TTTAATCCCAGCACTTGGGAAGCAGAGGCAGGTGGATCTC	195	1	53	1
17-qA3.3-27363.1	Eutherian	2-qE1-35981.1	Eutherian	chr17:27297330-27297360:-	TTTAATCCCAGCACTCACGCAGAAAAGGCA	chr2:92580775-92580815:-	TTTAATCCCAGCACTTGGGAAGCAGAGGCAGGTGGATCTC	34	1	53	1
5-qF-14224.1	Eutherian	2-qE1-35981.1	Eutherian	chr5:113343582-113343610:+	TTTAATCCCAGCTCTTGGGAGGCGGAGG	chr2:92580775-92580815:-	TTTAATCCCAGCACTTGGGAAGCAGAGGCAGGTGGATCTC	253	4	53	1
5-qF-14224.1	Eutherian	2-qE1-35981.1	Eutherian	chr5:113343582-113343611:+	TTTAATCCCAGCTCTTGGGAGGCGGAGGC	chr2:92580775-92580815:-	TTTAATCCCAGCACTTGGGAAGCAGAGGCAGGTGGATCTC	174	4	53	1
19-qC2-1361.1	Murine-specific	2-qF1-2536.1	Eutherian	chr19:37255575-37255605:-	TTACTCTGTAACTAAGGCTGGCCTCAGACT	chr2:127691957-127691997:-	TTACTCTGTAACTCAGCCTGATCTAGAACTTATTTTATTA	292	1	33	1
19-qC2-1361.1	Murine-specific	2-qF1-2536.1	Murine-specific	chr19:37255576-37255605:-	TTACTCTGTAACTAAGGCTGGCCTCAGAC	chr2:127691957-127691997:-	TTACTCTGTAACTCAGCCTGATCTAGAACTTATTTTATTA	46	1	33	1
19-qC2-1361.1	Murine-specific	2-qF1-2536.1	Murine-specific	chr19:37255577-37255605:-	TTACTCTGTAACTAAGGCTGGCCTCAGA	chr2:127691957-127691997:-	TTACTCTGTAACTCAGCCTGATCTAGAACTTATTTTATTA	90	1	33	1
2-qE1-35981.1	Eutherian	6-qF3-8009.1	Eutherian	chr2:92587009-92587035:+	TTGAATGAATGACTGAATGATTCTTT	chr6:127786627-127786667:+	TTGAATGAATGAGTGAATGAATGAACACATATCAGTAACT	32	1	25	1
2-qE1-35981.1	Eutherian	6-qF3-8009.1	Eutherian	chr2:92587009-92587038:+	TTGAATGAATGACTGAATGATTCTTTTGG	chr6:127786627-127786667:+	TTGAATGAATGAGTGAATGAATGAACACATATCAGTAACT	32	1	25	1
9-qC-31469.1	Murine-specific	6-qF3-8009.1	Eutherian	chr9:67728519-67728547:-	ATGAATGAATGAATGAATGGGGGTGTCT	chr6:127786627-127786667:+	TTGAATGAATGAGTGAATGAATGAACACATATCAGTAACT	57	1	25	1
9-qC-31469.1	Murine-specific	6-qF3-8009.1	Eutherian	chr9:67728520-67728547:-	ATGAATGAATGAATGAATGGGGGTGTC	chr6:127786627-127786667:+	TTGAATGAATGAGTGAATGAATGAACACATATCAGTAACT	33	1	25	1
5-qF-14224.1	Eutherian	14-qA3-3095.1	Mouse-specific	chr5:113350184-113350212:+	TATATGTTGAGCCTCCAGCTGTTCTTGC	chr14:19649346-19649386:+	TATATGTTGAACCTCCATCTGCTCTTGTACCAGTTGCTCA	71	1	56	1
5-qF-14224.1	Eutherian	14-qA3-3095.1	Mouse-specific	chr5:113350184-113350213:+	TATATGTTGAGCCTCCAGCTGTTCTTGCA	chr14:19649346-19649386:+	TATATGTTGAACCTCCATCTGCTCTTGTACCAGTTGCTCA	272	1	56	1
5-qF-14224.1	Eutherian	14-qA3-3095.1	Mouse-specific	chr5:113350184-113350214:+	TATATGTTGAGCCTCCAGCTGTTCTTGCAC	chr14:19649346-19649386:+	TATATGTTGAACCTCCATCTGCTCTTGTACCAGTTGCTCA	1829	1	56	1
5-qF-14224.1	Eutherian	14-qA3-3095.1	Mouse-specific	chr5:113350184-113350215:+	TATATGTTGAGCCTCCAGCTGTTCTTGCACT	chr14:19649346-19649386:+	TATATGTTGAACCTCCATCTGCTCTTGTACCAGTTGCTCA	217	1	56	1
5-qF-14224.1	Eutherian	14-qA3-3095.1	Mouse-specific	chr5:113350184-113350215:+	TATATGTTGAGCCTCCACCTGTTCTTGCACC	chr14:19649346-19649386:+	TATATGTTGAACCTCCATCTGCTCTTGTACCAGTTGCTCA	33	1	56	1
5-qF-14224.1	Eutherian	14-qA3-3095.1	Mouse-specific	chr5:113350184-113350215:+	TATATGTTTAGCCTCCAGCTGTTCTTGCACC	chr14:19649346-19649386:+	TATATGTTGAACCTCCATCTGCTCTTGTACCAGTTGCTCA	36	1	56	1
5-qF-14224.1	Eutherian	14-qA3-3095.1	Mouse-specific	chr5:113350184-113350215:+	TATATGTTGAGCCTCCAGCTGTTCTTGCACC	chr14:19649346-19649386:+	TATATGTTGAACCTCCATCTGCTCTTGTACCAGTTGCTCA	6838	1	56	1
5-qF-14224.1	Eutherian	14-qA3-3095.1	Mouse-specific	chr5:113350184-113350216:+	TATATGTTGAGCCTCCAGCTGTTCTTGCACCT	chr14:19649346-19649386:+	TATATGTTGAACCTCCATCTGCTCTTGTACCAGTTGCTCA	140	1	56	1
5-qF-14224.1	Eutherian	14-qA3-3095.1	Mouse-specific	chr5:113350184-113350216:+	TATATGTTGAGCCTCCAGCTGTTCTTGCACCA	chr14:19649346-19649386:+	TATATGTTGAACCTCCATCTGCTCTTGTACCAGTTGCTCA	261	1	56	1
4-qB3-639.1	Mouse-specific	6-qC3-6258.1	Murine-specific	chr4:62223728-62223757:-	TTCCTCACTGTCAGGAGTGAAGCTGATGA	chr6:81896941-81896981:+	GTCCTCATTGTCAGGTTTGAAGAAGAGAAGGGCTGTTTCC	67	2	61	1
4-qB3-639.1	Mouse-specific	6-qC3-6258.1	Murine-specific	chr4:62223729-62223757:-	TTCCTCACTGTCAGGAGTGAAGCTGATG	chr6:81896941-81896981:+	GTCCTCATTGTCAGGTTTGAAGAAGAGAAGGGCTGTTTCC	85	2	61	1
4-qB3-277.1	Murine-specific	6-qC3-6258.1	Murine-specific	chr4:62235773-62235801:+	TTCCTCACTGTCAGGAGTGAAGCTGATG	chr6:81896941-81896981:+	GTCCTCATTGTCAGGTTTGAAGAAGAGAAGGGCTGTTTCC	85	2	61	1
4-qB3-277.1	Murine-specific	6-qC3-6258.1	Murine-specific	chr4:62235773-62235802:+	TTCCTCACTGTCAGGAGTGAAGCTGATGA	chr6:81896941-81896981:+	GTCCTCATTGTCAGGTTTGAAGAAGAGAAGGGCTGTTTCC	67	2	61	1
17-qA3.3-27363.1	Eutherian	12-qE-23911.1	Eutherian	chr17:27295726-27295756:-	TGTCACAACGGCAGAAAGCTAACACACCAT	chr12:98395471-98395511:+	GGTCACAGCGACACAAAGCTGATTCGCACAGAAACCTGGA	139	1	27	1
17-qA3.3-27363.1	Eutherian	12-qE-23911.1	Eutherian	chr17:27295727-27295756:-	TGTCACAACGGCAGAAAGCTAACACACCA	chr12:98395471-98395511:+	GGTCACAGCGACACAAAGCTGATTCGCACAGAAACCTGGA	40	1	27	1
17-qA3.3-27363.1	Eutherian	12-qE-23911.1	Eutherian	chr17:27295728-27295756:-	TGTCACAACGGCAGAAAGCTAACACACC	chr12:98395471-98395511:+	GGTCACAGCGACACAAAGCTGATTCGCACAGAAACCTGGA	266	1	27	1
1-qD-4525.1	Murine-specific	15-qE1-8387.1	Eutherian	chr1:92993910-92993942:-	TGAAGAAAGGTCAGAAGCTCAATGGCTCCAGT	chr15:78664990-78665030:+	GGAAGAAGGGTCAGAAGGCCCAGGCCCAGGCCTCTCTTGG	39	1	54	1
1-qD-4525.1	Murine-specific	15-qE1-8387.1	Eutherian	chr1:92993913-92993942:-	TGAAGAAAGGTCAGAAGCTCAATGGCTCT	chr15:78664990-78665030:+	GGAAGAAGGGTCAGAAGGCCCAGGCCCAGGCCTCTCTTGG	54	1	54	1
1-qD-4525.1	Murine-specific	15-qE1-8387.1	Eutherian	chr1:92993913-92993942:-	TGAAGAAAGGTCAGAAGCTCAATGGCTCC	chr15:78664990-78665030:+	GGAAGAAGGGTCAGAAGGCCCAGGCCCAGGCCTCTCTTGG	90	1	54	1
1-qD-4525.1	Murine-specific	15-qE1-8387.1	Eutherian	chr1:92993914-92993942:-	TGAAGAAAGGTCAGAAGCTCAATGGCTC	chr15:78664990-78665030:+	GGAAGAAGGGTCAGAAGGCCCAGGCCCAGGCCTCTCTTGG	61	1	54	1
1-qD-4525.1	Murine-specific	15-qE1-8387.1	Eutherian	chr1:92993915-92993942:-	TGAAGAAAGGTCAGAAGCTCAATGGCT	chr15:78664990-78665030:+	GGAAGAAGGGTCAGAAGGCCCAGGCCCAGGCCTCTCTTGG	49	1	54	1
7-qF3-3125.1	Murine-specific	13-qA5-967.1	Murine-specific	chr7:125330212-125330244:-	AGCAACAACATAAACTGCGAAACAGGTGAAGT	chr13:52118617-52118657:-	GGCAACAACATAGAGTGTGAAGCAAGTGACCAATCTGCAC	58	1	29	1
7-qF3-3125.1	Murine-specific	13-qA5-967.1	Murine-specific	chr7:125330213-125330244:-	AGCAACAACATAAACTGCGAAACAGGTGAAG	chr13:52118617-52118657:-	GGCAACAACATAGAGTGTGAAGCAAGTGACCAATCTGCAC	104	1	29	1
7-qF3-3125.1	Murine-specific	13-qA5-967.1	Murine-specific	chr7:125330214-125330244:-	AGCAACAACATAAACTGCGAAACAGGTGAA	chr13:52118617-52118657:-	GGCAACAACATAGAGTGTGAAGCAAGTGACCAATCTGCAC	58	1	29	1
7-qF3-3125.1	Murine-specific	13-qA5-967.1	Murine-specific	chr7:125330215-125330244:-	AGCAACAACATAAACTGCGAAACAGGTGT	chr13:52118617-52118657:-	GGCAACAACATAGAGTGTGAAGCAAGTGACCAATCTGCAC	60	1	29	1
7-qF3-3125.1	Murine-specific	13-qA5-967.1	Murine-specific	chr7:125330215-125330244:-	AGCAACAACATAAACTGCGAAACAGGTGA	chr13:52118617-52118657:-	GGCAACAACATAGAGTGTGAAGCAAGTGACCAATCTGCAC	600	1	29	1
7-qF3-3125.1	Murine-specific	13-qA5-967.1	Murine-specific	chr7:125330216-125330244:-	AGCAACAACATAAACTGCGAAACAGGTG	chr13:52118617-52118657:-	GGCAACAACATAGAGTGTGAAGCAAGTGACCAATCTGCAC	197	1	29	1
7-qF3-3125.1	Murine-specific	13-qA5-967.1	Murine-specific	chr7:125330217-125330244:-	AGCAACAACATAAACTGCGAAACAGGT	chr13:52118617-52118657:-	GGCAACAACATAGAGTGTGAAGCAAGTGACCAATCTGCAC	38	1	29	1
17-qE1.1-7037.1	Mouse-specific	5-qG3-23659.1	Eutherian	chr17:66213641-66213671:+	TTGTTTGTTTGTTTGATTTGACCTGTCACT	chr5:149805407-149805447:+	TTGTTTGTTTGTTTGTTTTTTCCTTTCTGAGGGTTAATTT	31	1	37	1
17-qE1.1-7037.1	Mouse-specific	5-qG3-23659.1	Eutherian	chr17:66213641-66213671:+	TTGTTTGTTTGTTTGATTTGACCTGTCACC	chr5:149805407-149805447:+	TTGTTTGTTTGTTTGTTTTTTCCTTTCTGAGGGTTAATTT	341	1	37	1
17-qE1.1-7037.1	Mouse-specific	5-qG3-23659.1	Eutherian	chr17:66213641-66213672:+	TTGTTTGTTTGTTTGATTTGACCTGTCACCT	chr5:149805407-149805447:+	TTGTTTGTTTGTTTGTTTTTTCCTTTCTGAGGGTTAATTT	35	1	37	1
7-qB5-6255.1	Mouse-specific	5-qG3-23659.1	Eutherian	chr7:52909962-52909989:+	TTGTTTGGTTGGTTGTTTAGTCCTTGG	chr5:149805407-149805447:+	TTGTTTGTTTGTTTGTTTTTTCCTTTCTGAGGGTTAATTT	36	1	37	1
7-qB5-6255.1	Mouse-specific	5-qG3-23659.1	Eutherian	chr7:52909962-52909990:+	TTGTTTGGTTGGTTGTTTAGTCCTTGGG	chr5:149805407-149805447:+	TTGTTTGTTTGTTTGTTTTTTCCTTTCTGAGGGTTAATTT	63	1	37	1
7-qB5-6255.1	Mouse-specific	5-qG3-23659.1	Eutherian	chr7:52909962-52909991:+	TTGTTTGGTTGGTTGTTTAGTCCTTGGGA	chr5:149805407-149805447:+	TTGTTTGTTTGTTTGTTTTTTCCTTTCTGAGGGTTAATTT	36	1	37	1
7-qB5-6255.1	Mouse-specific	5-qG3-23659.1	Eutherian	chr7:52909962-52909991:+	TTGTTTGGTTGGTTGTTTAGTCCTTGGGT	chr5:149805407-149805447:+	TTGTTTGTTTGTTTGTTTTTTCCTTTCTGAGGGTTAATTT	79	1	37	1
5-qF-14224.1	Eutherian	14-qC1-1261.1	Mouse-specific	chr5:113350184-113350212:+	TATATGTTGAGCCTCCAGCTGTTCTTGC	chr14:44786922-44786962:+	TATATGTTGAGCCTCCATCTGCTCTTGTACCAGTTGCTCA	71	1	22	1
5-qF-14224.1	Eutherian	14-qC1-1261.1	Mouse-specific	chr5:113350184-113350213:+	TATATGTTGAGCCTCCAGCTGTTCTTGCA	chr14:44786922-44786962:+	TATATGTTGAGCCTCCATCTGCTCTTGTACCAGTTGCTCA	272	1	22	1
5-qF-14224.1	Eutherian	14-qC1-1261.1	Mouse-specific	chr5:113350184-113350214:+	TATATGTTGAGCCTCCAGCTGTTCTTGCAC	chr14:44786922-44786962:+	TATATGTTGAGCCTCCATCTGCTCTTGTACCAGTTGCTCA	1829	1	22	1
5-qF-14224.1	Eutherian	14-qC1-1261.1	Mouse-specific	chr5:113350184-113350215:+	TATATGTTGAGCCTCCAGCTGTTCTTGCACT	chr14:44786922-44786962:+	TATATGTTGAGCCTCCATCTGCTCTTGTACCAGTTGCTCA	217	1	22	1
5-qF-14224.1	Eutherian	14-qC1-1261.1	Mouse-specific	chr5:113350184-113350215:+	TATATGTTGAGCCTCCACCTGTTCTTGCACC	chr14:44786922-44786962:+	TATATGTTGAGCCTCCATCTGCTCTTGTACCAGTTGCTCA	33	1	22	1
5-qF-14224.1	Eutherian	14-qC1-1261.1	Mouse-specific	chr5:113350184-113350215:+	TATATGTTTAGCCTCCAGCTGTTCTTGCACC	chr14:44786922-44786962:+	TATATGTTGAGCCTCCATCTGCTCTTGTACCAGTTGCTCA	36	1	22	1
5-qF-14224.1	Eutherian	14-qC1-1261.1	Mouse-specific	chr5:113350184-113350215:+	TATATGTTGAGCCTCCAGCTGTTCTTGCACC	chr14:44786922-44786962:+	TATATGTTGAGCCTCCATCTGCTCTTGTACCAGTTGCTCA	6838	1	22	1
5-qF-14224.1	Eutherian	14-qC1-1261.1	Mouse-specific	chr5:113350184-113350216:+	TATATGTTGAGCCTCCAGCTGTTCTTGCACCT	chr14:44786922-44786962:+	TATATGTTGAGCCTCCATCTGCTCTTGTACCAGTTGCTCA	140	1	22	1
5-qF-14224.1	Eutherian	14-qC1-1261.1	Mouse-specific	chr5:113350184-113350216:+	TATATGTTGAGCCTCCAGCTGTTCTTGCACCA	chr14:44786922-44786962:+	TATATGTTGAGCCTCCATCTGCTCTTGTACCAGTTGCTCA	261	1	22	1
12-qE-23911.1	Eutherian	7-qD2-24830.1	Eutherian	chr12:98414924-98414954:-	TGAAATCATATACATACAAGCAACAGTAAA	chr7:73803382-73803422:+	TGAAATCATATACATACAATAACATTATGCAGACTGAGAA	95	1	77	1
1-qD-2017.1	Murine-specific	14-qA3-19970.1	Murine-specific	chr1:91404494-91404524:-	TGAGATAAAGCTCCTGTCCTCCAAACGTGG	chr14:24103119-24103159:-	TGAGATAAAGCTCATGTCATGAAATCAGGCGCCTCCGAGT	41	1	15	1
1-qD-2017.1	Murine-specific	14-qA3-19970.1	Murine-specific	chr1:91404494-91404524:-	TGAGATAAAGCTCCTGTCCTCCAAACGTGT	chr14:24103119-24103159:-	TGAGATAAAGCTCATGTCATGAAATCAGGCGCCTCCGAGT	62	1	15	1
1-qD-2017.1	Murine-specific	14-qA3-19970.1	Murine-specific	chr1:91404495-91404524:-	TGAGATAAAGCTCCTGTCCTCCAAACGTG	chr14:24103119-24103159:-	TGAGATAAAGCTCATGTCATGAAATCAGGCGCCTCCGAGT	39	1	15	1
2-qE1-35981.1	Eutherian	5-qF-14224.1	Eutherian	chr2:92573030-92573059:+	ATCTGTAAAATGGGGATAATAATAAGCCT	chr5:113353427-113353467:-	ATCTGTAAAATGGGGGTAAGAAACACCCGGCCTCTTTGTC	56	1	16	1
6-qF3-28913.1	Murine-specific	5-qF-14224.1	Eutherian	chr6:127797087-127797111:+	ATCTGTAAAATGGGGATAGTATTG	chr5:113353427-113353467:-	ATCTGTAAAATGGGGGTAAGAAACACCCGGCCTCTTTGTC	31	1	16	1
6-qF3-28913.1	Murine-specific	5-qF-14224.1	Eutherian	chr6:127797087-127797112:+	ATCTGTAAAATGGGGATAGTATTGG	chr5:113353427-113353467:-	ATCTGTAAAATGGGGGTAAGAAACACCCGGCCTCTTTGTC	182	1	16	1
6-qF3-28913.1	Murine-specific	5-qF-14224.1	Eutherian	chr6:127797087-127797113:+	ATCTGTAAAATGGGGATAGTATTGGG	chr5:113353427-113353467:-	ATCTGTAAAATGGGGGTAAGAAACACCCGGCCTCTTTGTC	153	1	16	1
6-qF3-28913.1	Murine-specific	5-qF-14224.1	Eutherian	chr6:127797087-127797114:+	ATCTGTAAAATGGGGATAGTATTGGGT	chr5:113353427-113353467:-	ATCTGTAAAATGGGGGTAAGAAACACCCGGCCTCTTTGTC	31	1	16	1
6-qF3-28913.1	Murine-specific	5-qF-14224.1	Eutherian	chr6:127797087-127797115:+	ATCTGTAAAATGGGGATAGTATTGGGTA	chr5:113353427-113353467:-	ATCTGTAAAATGGGGGTAAGAAACACCCGGCCTCTTTGTC	189	1	16	1
6-qF3-28913.1	Murine-specific	5-qF-14224.1	Eutherian	chr6:127797087-127797116:+	ATCTGTAAAATGGGGATAGTATTGGGTAA	chr5:113353427-113353467:-	ATCTGTAAAATGGGGGTAAGAAACACCCGGCCTCTTTGTC	58	1	16	1
6-qF3-28913.1	Murine-specific	5-qF-14224.1	Eutherian	chr6:127797087-127797117:+	ATCTGTAAAATGGGGATAGTATTGGGTAAA	chr5:113353427-113353467:-	ATCTGTAAAATGGGGGTAAGAAACACCCGGCCTCTTTGTC	33	1	16	1
10-qA3-2592.1	Murine-specific	15-qD3-14639.1	Murine-specific	chr10:18798106-18798135:-	TAACCATACTTGGAGACCATACTAATGTG	chr15:74648007-74648047:-	GAACCATACCTGGAGGCTACATTAACGTGGGCAAGGAGAA	125	1	17	1
10-qA3-2592.1	Murine-specific	15-qD3-14639.1	Murine-specific	chr10:18798108-18798135:-	TAACCATACTTGGAGACCATACTAATG	chr15:74648007-74648047:-	GAACCATACCTGGAGGCTACATTAACGTGGGCAAGGAGAA	41	1	17	1
17-qA3.3-27363.1	Eutherian	17-qA3.3-27363.1	Eutherian	chr17:27306620-27306651:-	TTCTACAATAAAGCTCTGAAACAGACTGTTT	chr17:27291031-27291071:+	TTCTACAATAAAGCTCTAGAACCATAGACTGCCTCTGTTC	232	1	43	1
17-qA3.3-27363.1	Eutherian	17-qA3.3-27363.1	Eutherian	chr17:27306620-27306651:-	TTCTACAATAAAGCTCTGAAACAGACTGTTC	chr17:27291031-27291071:+	TTCTACAATAAAGCTCTAGAACCATAGACTGCCTCTGTTC	255	1	43	1
17-qA3.3-27363.1	Eutherian	17-qA3.3-27363.1	Eutherian	chr17:27306621-27306651:-	TTCTACAATAAAGCTCTGAAACAGACTGTT	chr17:27291031-27291071:+	TTCTACAATAAAGCTCTAGAACCATAGACTGCCTCTGTTC	241	1	43	1
17-qA3.3-27363.1	Eutherian	17-qA3.3-27363.1	Eutherian	chr17:27306622-27306651:-	TTCTACAATAAAGCTCTGAAACAGACTGT	chr17:27291031-27291071:+	TTCTACAATAAAGCTCTAGAACCATAGACTGCCTCTGTTC	133	1	43	1
17-qA3.3-27363.1	Eutherian	17-qA3.3-27363.1	Eutherian	chr17:27306623-27306651:-	TTCTACAATAAAGCTCTGAAACAGACTG	chr17:27291031-27291071:+	TTCTACAATAAAGCTCTAGAACCATAGACTGCCTCTGTTC	60	1	43	1
2-qE1-35981.1	Eutherian	17-qA3.3-27363.1	Eutherian	chr2:92560880-92560910:+	TTCTACAATAAAACTCTAAAACCATAGATG	chr17:27291031-27291071:+	TTCTACAATAAAGCTCTAGAACCATAGACTGCCTCTGTTC	39	1	43	1
14-qA3-19970.1	Murine-specific	14-qA3-3095.1	Mouse-specific	chr14:24095226-24095250:+	TAGATGGATGTTACCCAGATTGCC	chr14:19633534-19633574:+	CAGATGGATGTAACACACATTTCCTCCTTTAGGAGGCTTC	311	1	28	1
14-qA3-19970.1	Murine-specific	14-qA3-3095.1	Mouse-specific	chr14:24095226-24095251:+	TAGATGGATGTTACCCAGATTGCCC	chr14:19633534-19633574:+	CAGATGGATGTAACACACATTTCCTCCTTTAGGAGGCTTC	1992	1	28	1
14-qA3-19970.1	Murine-specific	14-qA3-3095.1	Mouse-specific	chr14:24095226-24095252:+	TAGATGGATGTTACCCAGATTGCCCT	chr14:19633534-19633574:+	CAGATGGATGTAACACACATTTCCTCCTTTAGGAGGCTTC	49	1	28	1
14-qA3-19970.1	Murine-specific	14-qA3-3095.1	Mouse-specific	chr14:24095226-24095252:+	TAGATGGATGTTACCCAGATTGCCCC	chr14:19633534-19633574:+	CAGATGGATGTAACACACATTTCCTCCTTTAGGAGGCTTC	956	1	28	1
14-qA3-19970.1	Murine-specific	14-qA3-3095.1	Mouse-specific	chr14:24095226-24095253:+	TAGATGGATGTTACCCAGATTGCCCCC	chr14:19633534-19633574:+	CAGATGGATGTAACACACATTTCCTCCTTTAGGAGGCTTC	785	1	28	1
14-qA3-19970.1	Murine-specific	14-qA3-3095.1	Mouse-specific	chr14:24095226-24095256:+	TAGATGGATGTTACCCAGATTGCCCCCATC	chr14:19633534-19633574:+	CAGATGGATGTAACACACATTTCCTCCTTTAGGAGGCTTC	351	1	28	1
17-qE1.1-7037.1	Mouse-specific	18-qE1-36451.1	Eutherian	chr17:66221816-66221845:+	TCAATTCCTAGCAAACACATGATGGTTCA	chr18:67034594-67034634:+	TCAATTCCCAGCAACCACATGGTGGCTCACAGTCATCTGT	59	1	19	1
17-qE1.1-7037.1	Mouse-specific	18-qE1-36451.1	Eutherian	chr17:66221816-66221846:+	TCAATTCCTAGCAAACACATGATGGTTCAC	chr18:67034594-67034634:+	TCAATTCCCAGCAACCACATGGTGGCTCACAGTCATCTGT	93	1	19	1
15-qD3-14639.1	Murine-specific	6-qF3-28913.1	Murine-specific	chr15:74640315-74640342:+	TTCACATCCAAACCACACGGGGTCACC	chr6:127817718-127817758:-	CTCACATCCAATCCACCAGAGGGTCTCAGTAGTTACCAAG	48	1	50	1
15-qD3-14639.1	Murine-specific	6-qF3-28913.1	Murine-specific	chr15:74640315-74640343:+	TTCACATCCAAACCACACGGGGTCACCC	chr6:127817718-127817758:-	CTCACATCCAATCCACCAGAGGGTCTCAGTAGTTACCAAG	59	1	50	1
15-qD3-14639.1	Murine-specific	6-qF3-28913.1	Murine-specific	chr15:74640315-74640344:+	TTCACATCCAAACCACACGGGGTCACCCT	chr6:127817718-127817758:-	CTCACATCCAATCCACCAGAGGGTCTCAGTAGTTACCAAG	44	1	50	1
15-qD3-14639.1	Murine-specific	6-qF3-28913.1	Murine-specific	chr15:74640315-74640345:+	TTCACATCCAAACCACACGGGGTCACCCTC	chr6:127817718-127817758:-	CTCACATCCAATCCACCAGAGGGTCTCAGTAGTTACCAAG	164	1	50	1
15-qD3-14639.1	Murine-specific	6-qF3-28913.1	Murine-specific	chr15:74640315-74640345:+	TTCACATCCAAACCACACGGGGTCACCCTT	chr6:127817718-127817758:-	CTCACATCCAATCCACCAGAGGGTCTCAGTAGTTACCAAG	53	1	50	1
15-qD3-14639.1	Murine-specific	6-qF3-28913.1	Murine-specific	chr15:74640315-74640346:+	TTCACATCCAAACCACACGGGGTCACCCTCT	chr6:127817718-127817758:-	CTCACATCCAATCCACCAGAGGGTCTCAGTAGTTACCAAG	111	1	50	1
10-qB4-6488.1	Murine-specific	6-qC3-100.1	Murine-specific	chr10:62678240-62678270:+	TGAGTTCGAGCCCAGCCTGGTCTACCGAGT	chr6:83586362-83586402:-	TGAGTTCGAGGCCAGCCTGGTCTACAGAGTGAGTTCCAGG	59	1	21	1
9-qC-10667.1	Eutherian	6-qC3-100.1	Murine-specific	chr9:67742129-67742157:+	TGAGTTCAAGGACAGCCTGGTCTAAAAG	chr6:83586362-83586402:-	TGAGTTCGAGGCCAGCCTGGTCTACAGAGTGAGTTCCAGG	41	1	21	1
9-qC-10667.1	Eutherian	6-qC3-100.1	Murine-specific	chr9:67742129-67742158:+	TGAGTTCAAGGACAGCCTGGTCTAAAAGT	chr6:83586362-83586402:-	TGAGTTCGAGGCCAGCCTGGTCTACAGAGTGAGTTCCAGG	86	1	21	1
1-qD-4525.1	Murine-specific	9-qA5.3-24188.1	Eutherian	chr1:92995188-92995217:-	TCTGCAAGCCTGGGGCTCTCTTATTCCTG	chr9:54233750-54233790:+	ACTGCAAGCCAGGAGCTCCTTGCTCTTGGTTTTTTGGAAT	53	1	25	1
1-qD-4525.1	Murine-specific	9-qA5.3-24188.1	Eutherian	chr1:92995189-92995217:-	TCTGCAAGCCTGGGGCTCTCTTATTCCT	chr9:54233750-54233790:+	ACTGCAAGCCAGGAGCTCCTTGCTCTTGGTTTTTTGGAAT	55	1	25	1
5-qF-14508.1	Eutherian	7-qD1-19431.1	Eutherian	chr5:113332861-113332892:-	TTGAACTCAGGTTTTCATACTTAGCCACAGA	chr7:73134738-73134778:-	TTGAACTCAGGTTCTCATGCTTGCAAGGCAAGCACCTTAC	82	1	25	1
10-qB4-6488.1	Murine-specific	5-qG2-950.1	Murine-specific	chr10:62676286-62676316:+	TTTAATCCCAGTTCTCGGGAGTTTGAGAGC	chr5:136935338-136935378:-	TTTAATCCCAGCACTTGGGAGGCAGAGGCAAGTGGATCTC	40	1	70	1
10-qB4-6488.1	Murine-specific	5-qG2-950.1	Murine-specific	chr10:62688647-62688673:+	TTTAATCTTAGCACTGGGGAGACTGA	chr5:136935338-136935378:-	TTTAATCCCAGCACTTGGGAGGCAGAGGCAAGTGGATCTC	42	1	70	1
10-qB4-6488.1	Murine-specific	5-qG2-950.1	Murine-specific	chr10:62688647-62688675:+	TTTAATCTTAGCACTGGGGAGACTGAGT	chr5:136935338-136935378:-	TTTAATCCCAGCACTTGGGAGGCAGAGGCAAGTGGATCTC	47	1	70	1
10-qB4-6488.1	Murine-specific	5-qG2-950.1	Murine-specific	chr10:62688647-62688675:+	TTTAATCTTAGCACTGGGGAGACTGAGA	chr5:136935338-136935378:-	TTTAATCCCAGCACTTGGGAGGCAGAGGCAAGTGGATCTC	75	1	70	1
10-qB4-6488.1	Murine-specific	5-qG2-950.1	Murine-specific	chr10:62688647-62688676:+	TTTAATCTTAGCACTGGGGAGACTGAGAT	chr5:136935338-136935378:-	TTTAATCCCAGCACTTGGGAGGCAGAGGCAAGTGGATCTC	181	1	70	1
15-qD3-14639.1	Murine-specific	5-qG2-950.1	Murine-specific	chr15:74657262-74657288:+	TTTAATCACAGCACTAGGGAAACAGA	chr5:136935338-136935378:-	TTTAATCCCAGCACTTGGGAGGCAGAGGCAAGTGGATCTC	65	2	70	1
15-qD3-14639.1	Murine-specific	5-qG2-950.1	Murine-specific	chr15:74657262-74657289:+	TTTAATCACAGCACTAGGGAAACAGAA	chr5:136935338-136935378:-	TTTAATCCCAGCACTTGGGAGGCAGAGGCAAGTGGATCTC	149	1	70	1
15-qD3-14639.1	Murine-specific	5-qG2-950.1	Murine-specific	chr15:74657262-74657290:+	TTTAATCACAGCACTAGGGAAACAGAAG	chr5:136935338-136935378:-	TTTAATCCCAGCACTTGGGAGGCAGAGGCAAGTGGATCTC	378	1	70	1
15-qD3-14639.1	Murine-specific	5-qG2-950.1	Murine-specific	chr15:74657262-74657291:+	TTTAATCACAGCACTAGGGAAACAGAAGC	chr5:136935338-136935378:-	TTTAATCCCAGCACTTGGGAGGCAGAGGCAAGTGGATCTC	1836	1	70	1
15-qD3-14639.1	Murine-specific	5-qG2-950.1	Murine-specific	chr15:74657262-74657291:+	TTTAATCACAGCACTAGGGAAACAGAAGT	chr5:136935338-136935378:-	TTTAATCCCAGCACTTGGGAGGCAGAGGCAAGTGGATCTC	81	1	70	1
15-qD3-14639.1	Murine-specific	5-qG2-950.1	Murine-specific	chr15:74657262-74657292:+	TTTAATCACAGCACTAGGGAAACAGAAGCT	chr5:136935338-136935378:-	TTTAATCCCAGCACTTGGGAGGCAGAGGCAAGTGGATCTC	1523	1	70	1
15-qD3-14639.1	Murine-specific	5-qG2-950.1	Murine-specific	chr15:74657262-74657293:+	TTTAATCACAGCACTAGGGAAACAGAAGCTT	chr5:136935338-136935378:-	TTTAATCCCAGCACTTGGGAGGCAGAGGCAAGTGGATCTC	195	1	70	1
5-qF-14224.1	Eutherian	5-qG2-950.1	Murine-specific	chr5:113343582-113343610:+	TTTAATCCCAGCTCTTGGGAGGCGGAGG	chr5:136935338-136935378:-	TTTAATCCCAGCACTTGGGAGGCAGAGGCAAGTGGATCTC	253	4	70	1
5-qF-14224.1	Eutherian	5-qG2-950.1	Murine-specific	chr5:113343582-113343611:+	TTTAATCCCAGCTCTTGGGAGGCGGAGGC	chr5:136935338-136935378:-	TTTAATCCCAGCACTTGGGAGGCAGAGGCAAGTGGATCTC	174	4	70	1
9-qA5.3-1495.1	Murine-specific	5-qG2-950.1	Murine-specific	chr9:54249982-54250008:+	TTTAATCTCAGCACCGTGGAGGCAGA	chr5:136935338-136935378:-	TTTAATCCCAGCACTTGGGAGGCAGAGGCAAGTGGATCTC	47	1	70	1
9-qA5.3-1495.1	Murine-specific	5-qG2-950.1	Murine-specific	chr9:54249982-54250011:+	TTTAATCTCAGCACCGTGGAGGCAGAGGC	chr5:136935338-136935378:-	TTTAATCCCAGCACTTGGGAGGCAGAGGCAAGTGGATCTC	60	1	70	1
9-qA5.3-1495.1	Murine-specific	5-qG2-950.1	Murine-specific	chr9:54249982-54250012:+	TTTAATCTCAGCACCGTGGAGGCAGAGGCT	chr5:136935338-136935378:-	TTTAATCCCAGCACTTGGGAGGCAGAGGCAAGTGGATCTC	41	1	70	1
9-qC-31469.1	Murine-specific	6-qF3-28913.1	Murine-specific	chr9:67725634-67725664:-	TACTGTTTACTTTACCCTTCCTGACAGCCT	chr6:127804001-127804041:-	CACTGTTTACTTAACCATTCCCAGCTTGGAATTGGTCAGG	2357	1	19	1
9-qC-31469.1	Murine-specific	6-qF3-28913.1	Murine-specific	chr9:67725635-67725664:-	TACTGTTTACTTTACCCTTCCTGACAGCC	chr6:127804001-127804041:-	CACTGTTTACTTAACCATTCCCAGCTTGGAATTGGTCAGG	385	1	19	1
9-qC-31469.1	Murine-specific	6-qF3-28913.1	Murine-specific	chr9:67725636-67725664:-	TACTGTTTACTTTACCCTTCCTGACAGC	chr6:127804001-127804041:-	CACTGTTTACTTAACCATTCCCAGCTTGGAATTGGTCAGG	35	1	19	1
9-qC-31469.1	Murine-specific	6-qF3-28913.1	Murine-specific	chr9:67725637-67725664:-	TACTGTTTACTTTACCCTTCCTGACAG	chr6:127804001-127804041:-	CACTGTTTACTTAACCATTCCCAGCTTGGAATTGGTCAGG	37	1	19	1
9-qC-31469.1	Murine-specific	6-qF3-28913.1	Murine-specific	chr9:67725638-67725664:-	TACTGTTTACTTTACCCTTCCTGACA	chr6:127804001-127804041:-	CACTGTTTACTTAACCATTCCCAGCTTGGAATTGGTCAGG	55	1	19	1
14-qA3-19970.1	Murine-specific	17-qE1.1-7037.1	Mouse-specific	chr14:24091972-24091997:+	GTCTGTCTTAGTCTGGGTTCTGAGT	chr17:66224612-66224652:-	ATCTGTCTTAGTCAGGATTTCTATTGCCGTTATGAATCGC	33	1	27	1
14-qA3-19970.1	Murine-specific	17-qE1.1-7037.1	Mouse-specific	chr14:24091972-24091997:+	GTCTGTCTTAGTCTGGGTTCTGAGA	chr17:66224612-66224652:-	ATCTGTCTTAGTCAGGATTTCTATTGCCGTTATGAATCGC	515	1	27	1
14-qA3-19970.1	Murine-specific	17-qE1.1-7037.1	Mouse-specific	chr14:24091972-24091998:+	GTCTGTCTTAGTCTGGGTTCTGAGAA	chr17:66224612-66224652:-	ATCTGTCTTAGTCAGGATTTCTATTGCCGTTATGAATCGC	32	1	27	1
14-qA3-19970.1	Murine-specific	17-qE1.1-7037.1	Mouse-specific	chr14:24091972-24091999:+	GTCTGTCTTAGTCTGGGTTCTGAGAAG	chr17:66224612-66224652:-	ATCTGTCTTAGTCAGGATTTCTATTGCCGTTATGAATCGC	31	1	27	1
14-qA3-19970.1	Murine-specific	17-qE1.1-7037.1	Mouse-specific	chr14:24091972-24092002:+	GTCTGTCTTAGTCTGGGTTCTGAGAAGCCT	chr17:66224612-66224652:-	ATCTGTCTTAGTCAGGATTTCTATTGCCGTTATGAATCGC	44	1	27	1
17-qA3.3-27363.1	Eutherian	17-qA3.3-26735.1	Eutherian	chr17:27292319-27292350:-	TTCAGAACAAAGGTACGGTTGCAAGATGGTT	chr17:27339072-27339112:-	TTCAGAACAAAGGTAGGGTTGCAAGATGGTTATAAACAAC	84	1	37	1
17-qA3.3-27363.1	Eutherian	17-qA3.3-26735.1	Eutherian	chr17:27292320-27292350:-	TTCAGAACAAAGGTACGGTTGCAAGATGGT	chr17:27339072-27339112:-	TTCAGAACAAAGGTAGGGTTGCAAGATGGTTATAAACAAC	55	1	37	1
17-qA3.3-27363.1	Eutherian	17-qA3.3-26735.1	Eutherian	chr17:27292321-27292350:-	TTCAGAACAAAGGTACGGTTGCAAGATGG	chr17:27339072-27339112:-	TTCAGAACAAAGGTAGGGTTGCAAGATGGTTATAAACAAC	89	1	37	1
17-qA3.3-27363.1	Eutherian	17-qA3.3-26735.1	Eutherian	chr17:27292323-27292350:-	TTCAGAACAAAGGTACGGTTGCAAGAT	chr17:27339072-27339112:-	TTCAGAACAAAGGTAGGGTTGCAAGATGGTTATAAACAAC	46	1	37	1
17-qA3.3-27363.1	Eutherian	17-qA3.3-26735.1	Eutherian	chr17:27292324-27292350:-	TTCAGAACAAAGGTACGGTTGCAAGA	chr17:27339072-27339112:-	TTCAGAACAAAGGTAGGGTTGCAAGATGGTTATAAACAAC	94	1	37	1
10-qB4-6488.1	Murine-specific	14-qA3-19970.1	Murine-specific	chr10:62654708-62654737:+	TGGGATTAAATTTGTGTGCCACCATGCCT	chr14:24123272-24123312:-	TGGGATTAAAGGCGTGTGCCACCACCACCCAGCAATGGTT	39	1	18	1
10-qB4-6488.1	Murine-specific	14-qA3-19970.1	Murine-specific	chr10:62703613-62703642:+	TGGGATTAAAGGAATGGACCACCATCGCC	chr14:24123272-24123312:-	TGGGATTAAAGGCGTGTGCCACCACCACCCAGCAATGGTT	33	1	18	1
10-qC1-12816.1	Murine-specific	14-qA3-19970.1	Murine-specific	chr10:75858472-75858497:+	TGGGATTAAGGGCATGGGCCAGCCT	chr14:24123272-24123312:-	TGGGATTAAAGGCGTGTGCCACCACCACCCAGCAATGGTT	41	1	18	1
10-qC1-12816.1	Murine-specific	14-qA3-19970.1	Murine-specific	chr10:75858472-75858499:+	TGGGATTAAGGGCATGGGCCAGCCACC	chr14:24123272-24123312:-	TGGGATTAAAGGCGTGTGCCACCACCACCCAGCAATGGTT	297	1	18	1
10-qC1-12816.1	Murine-specific	14-qA3-19970.1	Murine-specific	chr10:75858472-75858500:+	TGGGATTAAGGGCATGGGCCAGCCACCA	chr14:24123272-24123312:-	TGGGATTAAAGGCGTGTGCCACCACCACCCAGCAATGGTT	31	1	18	1
10-qC1-12816.1	Murine-specific	14-qA3-19970.1	Murine-specific	chr10:75858472-75858502:+	TGGGATTAAGGGCATGGGCCAGCCACCACT	chr14:24123272-24123312:-	TGGGATTAAAGGCGTGTGCCACCACCACCCAGCAATGGTT	175	1	18	1
10-qC1-12816.1	Murine-specific	14-qA3-19970.1	Murine-specific	chr10:75858472-75858504:+	TGGGATTAAGGGCATGGGCCAGCCACCACAGC	chr14:24123272-24123312:-	TGGGATTAAAGGCGTGTGCCACCACCACCCAGCAATGGTT	48	1	18	1
14-qA3-19970.1	Murine-specific	14-qA3-19970.1	Murine-specific	chr14:24120783-24120814:+	TGGGATTAAAGGCATGTGCCACAATGCCAGG	chr14:24123272-24123312:-	TGGGATTAAAGGCGTGTGCCACCACCACCCAGCAATGGTT	81	1	18	1
14-qC1-1261.1	Mouse-specific	14-qA3-19970.1	Murine-specific	chr14:44774858-44774890:-	TGGGATTAAACGCATGAACCACCATGCATGGA	chr14:24123272-24123312:-	TGGGATTAAAGGCGTGTGCCACCACCACCCAGCAATGGTT	34	1	18	1
14-qC1-1261.1	Mouse-specific	14-qA3-19970.1	Murine-specific	chr14:44774861-44774890:-	TGGGATTAAACGCATGAACCACCATGCAT	chr14:24123272-24123312:-	TGGGATTAAAGGCGTGTGCCACCACCACCCAGCAATGGTT	45	1	18	1
15-qD1-4001.1	Murine-specific	14-qA3-19970.1	Murine-specific	chr15:59280920-59280944:+	TGGGATTAAAGGTGTGTGTGCTCC	chr14:24123272-24123312:-	TGGGATTAAAGGCGTGTGCCACCACCACCCAGCAATGGTT	116	1	18	1
15-qD1-4001.1	Murine-specific	14-qA3-19970.1	Murine-specific	chr15:59280920-59280947:+	TGGGATTAAAGGTGTGTGTGCTCCACT	chr14:24123272-24123312:-	TGGGATTAAAGGCGTGTGCCACCACCACCCAGCAATGGTT	57	1	18	1
15-qD1-4001.1	Murine-specific	14-qA3-19970.1	Murine-specific	chr15:59280920-59280947:+	TGGGATTAAAGGTGTGTGTGCTCCACC	chr14:24123272-24123312:-	TGGGATTAAAGGCGTGTGCCACCACCACCCAGCAATGGTT	79	1	18	1
15-qD1-4001.1	Murine-specific	14-qA3-19970.1	Murine-specific	chr15:59280920-59280948:+	TGGGATTAAAGGTGTGTGTGCTCCACCA	chr14:24123272-24123312:-	TGGGATTAAAGGCGTGTGCCACCACCACCCAGCAATGGTT	101	1	18	1
15-qD1-4001.1	Murine-specific	14-qA3-19970.1	Murine-specific	chr15:59280920-59280950:+	TGGGATTAAAGGTGTGTGTGCTCCACCACA	chr14:24123272-24123312:-	TGGGATTAAAGGCGTGTGCCACCACCACCCAGCAATGGTT	89	1	18	1
15-qD3-14639.1	Murine-specific	14-qA3-19970.1	Murine-specific	chr15:74649399-74649428:+	TGGGATTAAAGGTGTGTGACACAGTGCCT	chr14:24123272-24123312:-	TGGGATTAAAGGCGTGTGCCACCACCACCCAGCAATGGTT	147	1	18	1
2-qE1-35981.1	Eutherian	14-qA3-19970.1	Murine-specific	chr2:92568314-92568344:+	TGGGATTAAAGGCGTGTGCCATCACTATCC	chr14:24123272-24123312:-	TGGGATTAAAGGCGTGTGCCACCACCACCCAGCAATGGTT	72	1	18	1
4-qD2.2-2182.1	Murine-specific	14-qA3-19970.1	Murine-specific	chr4:123835196-123835225:-	TGGGATTAAAGGTGTACACCACCACGTCT	chr14:24123272-24123312:-	TGGGATTAAAGGCGTGTGCCACCACCACCCAGCAATGGTT	64	1	18	1
4-qD2.2-2182.1	Murine-specific	14-qA3-19970.1	Murine-specific	chr4:123835197-123835225:-	TGGGATTAAAGGTGTACACCACCACGTC	chr14:24123272-24123312:-	TGGGATTAAAGGCGTGTGCCACCACCACCCAGCAATGGTT	119	1	18	1
6-qD1-2831.1	Murine-specific	14-qA3-19970.1	Murine-specific	chr6:87985595-87985625:-	TGGGATTAAAGGCATGCGCAACCACGCCTG	chr14:24123272-24123312:-	TGGGATTAAAGGCGTGTGCCACCACCACCCAGCAATGGTT	54	1	18	1
6-qD1-2831.1	Murine-specific	14-qA3-19970.1	Murine-specific	chr6:87985596-87985625:-	TGGGATTAAAGGCATGCGCAACCACGCCT	chr14:24123272-24123312:-	TGGGATTAAAGGCGTGTGCCACCACCACCCAGCAATGGTT	34	1	18	1
9-qC-31469.1	Murine-specific	14-qA3-19970.1	Murine-specific	chr9:67694516-67694547:-	TGGGATTAAAGGTGTGTATCAAAAAGCCAGT	chr14:24123272-24123312:-	TGGGATTAAAGGCGTGTGCCACCACCACCCAGCAATGGTT	47	1	18	1
9-qC-31469.1	Murine-specific	14-qA3-19970.1	Murine-specific	chr9:67694516-67694547:-	TGGGATTAAAGGTGTGTATCAAAAAGCCAGC	chr14:24123272-24123312:-	TGGGATTAAAGGCGTGTGCCACCACCACCCAGCAATGGTT	89	1	18	1
9-qC-31469.1	Murine-specific	14-qA3-19970.1	Murine-specific	chr9:67694517-67694547:-	TGGGATTAAAGGTGTGTATCAAAAAGCCAG	chr14:24123272-24123312:-	TGGGATTAAAGGCGTGTGCCACCACCACCCAGCAATGGTT	61	1	18	1
9-qC-31469.1	Murine-specific	14-qA3-19970.1	Murine-specific	chr9:67694518-67694547:-	TGGGATTAAAGGTGTGTATCAAAAAGCCA	chr14:24123272-24123312:-	TGGGATTAAAGGCGTGTGCCACCACCACCCAGCAATGGTT	203	1	18	1
9-qC-31469.1	Murine-specific	14-qA3-19970.1	Murine-specific	chr9:67694519-67694547:-	TGGGATTAAAGGTGTGTATCAAAAAGCC	chr14:24123272-24123312:-	TGGGATTAAAGGCGTGTGCCACCACCACCCAGCAATGGTT	136	1	18	1
14-qA3-19970.1	Murine-specific	5-qF-14508.1	Eutherian	chr14:24116991-24117022:+	TGTGATAAAATATCATGACCTAGAGAAACTC	chr5:113336298-113336338:+	TGTGATAAAACATCCTGACCAAGAGCAACGTTTGGAGAGA	119	1	79	1
4-qC5-17839.1	Eutherian	5-qF-14508.1	Eutherian	chr4:94290695-94290727:-	TGTGATAAAATGCTCTGACCAGAAACACCTTT	chr5:113336298-113336338:+	TGTGATAAAACATCCTGACCAAGAGCAACGTTTGGAGAGA	31	1	79	1
4-qC5-17839.1	Eutherian	5-qF-14508.1	Eutherian	chr4:94290696-94290727:-	TGTGATAAAATGCTCTGACCAGAAACACCTT	chr5:113336298-113336338:+	TGTGATAAAACATCCTGACCAAGAGCAACGTTTGGAGAGA	237	1	79	1
4-qC5-17839.1	Eutherian	5-qF-14508.1	Eutherian	chr4:94290697-94290727:-	TGTGATAAAATGCTCTGACCAGAAACACCC	chr5:113336298-113336338:+	TGTGATAAAACATCCTGACCAAGAGCAACGTTTGGAGAGA	38	1	79	1
4-qC5-17839.1	Eutherian	5-qF-14508.1	Eutherian	chr4:94290697-94290727:-	TGTGATAAAATTCTCTGACCAGAAACACCT	chr5:113336298-113336338:+	TGTGATAAAACATCCTGACCAAGAGCAACGTTTGGAGAGA	67	1	79	1
4-qC5-17839.1	Eutherian	5-qF-14508.1	Eutherian	chr4:94290697-94290727:-	TGTGATAAAATGCTCTGACCAGAAACACCT	chr5:113336298-113336338:+	TGTGATAAAACATCCTGACCAAGAGCAACGTTTGGAGAGA	8607	1	79	1
4-qC5-17839.1	Eutherian	5-qF-14508.1	Eutherian	chr4:94290698-94290727:-	TGTGATAAAATGCTCTGACCAGAAACACC	chr5:113336298-113336338:+	TGTGATAAAACATCCTGACCAAGAGCAACGTTTGGAGAGA	1063	1	79	1
4-qC5-17839.1	Eutherian	5-qF-14508.1	Eutherian	chr4:94290698-94290727:-	TGTGATAAAATGCTCTGACCAGAAACACT	chr5:113336298-113336338:+	TGTGATAAAACATCCTGACCAAGAGCAACGTTTGGAGAGA	62	1	79	1
4-qC5-17839.1	Eutherian	5-qF-14508.1	Eutherian	chr4:94290699-94290727:-	TGTGATAAAATGCTCTGACCAGAAACAC	chr5:113336298-113336338:+	TGTGATAAAACATCCTGACCAAGAGCAACGTTTGGAGAGA	44	1	79	1
4-qC5-17839.1	Eutherian	5-qF-14508.1	Eutherian	chr4:94290701-94290727:-	TGTGATAAAATGCTCTGACCAGAAAC	chr5:113336298-113336338:+	TGTGATAAAACATCCTGACCAAGAGCAACGTTTGGAGAGA	49	1	79	1
9-qA5.3-24188.1	Eutherian	5-qF-14508.1	Eutherian	chr9:54214513-54214543:-	TGTGATAAAATATCATGACCAGAAGCAACT	chr5:113336298-113336338:+	TGTGATAAAACATCCTGACCAAGAGCAACGTTTGGAGAGA	135	1	79	1
15-qE1-8387.1	Eutherian	17-qA3.3-27363.1	Eutherian	chr15:78666405-78666437:-	TCAGTTGGTAGAGTGCTTGCCTAGCACGAATT	chr17:27294835-27294875:+	TCAGTTGGTAGGGTGCTTGCCAGGAACATATGAAGCCAGG	86	1	20	1
15-qE1-8387.1	Eutherian	17-qA3.3-27363.1	Eutherian	chr15:78666406-78666437:-	TCAGTTGGTAGAGTGCTTGCCTAGCACGAAT	chr17:27294835-27294875:+	TCAGTTGGTAGGGTGCTTGCCAGGAACATATGAAGCCAGG	265	1	20	1
15-qE1-8387.1	Eutherian	17-qA3.3-27363.1	Eutherian	chr15:78666406-78666437:-	TCAGTTGGTAGAGTGCTTGCCTAGCACGATT	chr17:27294835-27294875:+	TCAGTTGGTAGGGTGCTTGCCAGGAACATATGAAGCCAGG	49	1	20	1
15-qE1-8387.1	Eutherian	17-qA3.3-27363.1	Eutherian	chr15:78666407-78666437:-	TCAGTTGGTAGAGTGCTTGCCTAGCACGAA	chr17:27294835-27294875:+	TCAGTTGGTAGGGTGCTTGCCAGGAACATATGAAGCCAGG	314	1	20	1
15-qE1-8387.1	Eutherian	17-qA3.3-27363.1	Eutherian	chr15:78666408-78666437:-	TCAGTTGGTAGAGTGCTTGCCTAGCACGA	chr17:27294835-27294875:+	TCAGTTGGTAGGGTGCTTGCCAGGAACATATGAAGCCAGG	287	1	20	1
15-qE1-8387.1	Eutherian	17-qA3.3-27363.1	Eutherian	chr15:78666409-78666437:-	TCAGTTGGTAGAGTGCTTGCCTAGCACG	chr17:27294835-27294875:+	TCAGTTGGTAGGGTGCTTGCCAGGAACATATGAAGCCAGG	192	4	20	1
7-qD2-24830.1	Eutherian	15-qE1-8387.1	Eutherian	chr7:73795357-73795386:-	TAAGAACAAGTAAAGTATTGGGGGAAAGT	chr15:78663526-78663566:+	GAAGAACAAGAAAAGCCTTGGGGATCAGATGAGGTGGGCT	39	1	23	1
7-qD2-24830.1	Eutherian	15-qE1-8387.1	Eutherian	chr7:73795360-73795386:-	TAAGAACAAGTAAAGTATTGGGGGAA	chr15:78663526-78663566:+	GAAGAACAAGAAAAGCCTTGGGGATCAGATGAGGTGGGCT	44	1	23	1
15-qD1-17920.1	Eutherian	9-qC-10667.1	Eutherian	chr15:59272013-59272043:-	TAGCAGAAAAGGAGGCTGGTAAAAGGCTGT	chr9:67748219-67748259:-	CAGCAGAAAAGGAGCCAGGAGAAGTTGTGGACAGCCTGGT	50	1	49	1
15-qD1-17920.1	Eutherian	9-qC-10667.1	Eutherian	chr15:59272014-59272043:-	TAGCAGAAAAGGAGGCTGGTAAAAGGCTT	chr9:67748219-67748259:-	CAGCAGAAAAGGAGCCAGGAGAAGTTGTGGACAGCCTGGT	105	1	49	1
15-qD1-17920.1	Eutherian	9-qC-10667.1	Eutherian	chr15:59272014-59272043:-	TAGCAGAAAAGGAGGCTGGTAAAAGGCTG	chr9:67748219-67748259:-	CAGCAGAAAAGGAGCCAGGAGAAGTTGTGGACAGCCTGGT	36	1	49	1
15-qD1-17920.1	Eutherian	9-qC-10667.1	Eutherian	chr15:59272015-59272043:-	TAGCAGAAAAGGAGGCTGGTAAAAGGCT	chr9:67748219-67748259:-	CAGCAGAAAAGGAGCCAGGAGAAGTTGTGGACAGCCTGGT	77	1	49	1
15-qD1-17920.1	Eutherian	9-qC-10667.1	Eutherian	chr15:59272016-59272043:-	TAGCAGAAAAGGAGGCTGGTAAAAGGC	chr9:67748219-67748259:-	CAGCAGAAAAGGAGCCAGGAGAAGTTGTGGACAGCCTGGT	177	1	49	1
15-qD1-17920.1	Eutherian	9-qC-10667.1	Eutherian	chr15:59272016-59272043:-	TAGCAGAAAAGGAGGCTGGTAAAAGGT	chr9:67748219-67748259:-	CAGCAGAAAAGGAGCCAGGAGAAGTTGTGGACAGCCTGGT	227	1	49	1
15-qD1-17920.1	Eutherian	9-qC-10667.1	Eutherian	chr15:59272017-59272043:-	TAGCAGAAAAGGAGGCTGGTAAAAGT	chr9:67748219-67748259:-	CAGCAGAAAAGGAGCCAGGAGAAGTTGTGGACAGCCTGGT	120	1	49	1
15-qD1-17920.1	Eutherian	9-qC-10667.1	Eutherian	chr15:59272017-59272043:-	TAGCAGAAAAGGAGGCTGGTAAAAGG	chr9:67748219-67748259:-	CAGCAGAAAAGGAGCCAGGAGAAGTTGTGGACAGCCTGGT	616	1	49	1
15-qD1-17920.1	Eutherian	9-qC-10667.1	Eutherian	chr15:59272018-59272043:-	TAGCAGAAAAGGAGGCTGGTAAAAG	chr9:67748219-67748259:-	CAGCAGAAAAGGAGCCAGGAGAAGTTGTGGACAGCCTGGT	113	1	49	1
10-qC1-2617.1	Murine-specific	15-qD1-4001.1	Murine-specific	chr10:85748666-85748691:+	TCTCTGTGTAGGCCTGACTGTACTG	chr15:59284272-59284312:-	TCTCTGTGTAGCCCTGGCTGTCCTGGAGCTCAACTTTGTA	188	3	14	1
10-qC1-2617.1	Murine-specific	15-qD1-4001.1	Murine-specific	chr10:85748666-85748693:+	TCTCTGTGTAGGCCTGACTGTACTGGA	chr15:59284272-59284312:-	TCTCTGTGTAGCCCTGGCTGTCCTGGAGCTCAACTTTGTA	450	3	14	1
10-qC1-2617.1	Murine-specific	15-qD1-4001.1	Murine-specific	chr10:85748666-85748695:+	TCTCTGTGTAGGCCTGACTGTACTGGAAC	chr15:59284272-59284312:-	TCTCTGTGTAGCCCTGGCTGTCCTGGAGCTCAACTTTGTA	487	3	14	1
10-qC1-2617.1	Murine-specific	15-qD1-4001.1	Murine-specific	chr10:85748666-85748696:+	TCTCTGTGTAGGCCTGACTGTACTGGAACT	chr15:59284272-59284312:-	TCTCTGTGTAGCCCTGGCTGTCCTGGAGCTCAACTTTGTA	2891	3	14	1
10-qC1-1527.1	Mouse-specific	15-qD1-4001.1	Murine-specific	chr10:86591379-86591409:-	TCTCTGTGTAGGCCTGACTGTACTGGAACT	chr15:59284272-59284312:-	TCTCTGTGTAGCCCTGGCTGTCCTGGAGCTCAACTTTGTA	2891	3	14	1
10-qC1-1527.1	Mouse-specific	15-qD1-4001.1	Murine-specific	chr10:86591380-86591409:-	TCTCTGTGTAGGCCTGACTGTACTGGAAC	chr15:59284272-59284312:-	TCTCTGTGTAGCCCTGGCTGTCCTGGAGCTCAACTTTGTA	487	3	14	1
10-qC1-1527.1	Mouse-specific	15-qD1-4001.1	Murine-specific	chr10:86591382-86591409:-	TCTCTGTGTAGGCCTGACTGTACTGGA	chr15:59284272-59284312:-	TCTCTGTGTAGCCCTGGCTGTCCTGGAGCTCAACTTTGTA	450	3	14	1
10-qC1-1527.1	Mouse-specific	15-qD1-4001.1	Murine-specific	chr10:86591384-86591409:-	TCTCTGTGTAGGCCTGACTGTACTG	chr15:59284272-59284312:-	TCTCTGTGTAGCCCTGGCTGTCCTGGAGCTCAACTTTGTA	188	3	14	1
10-qC1-875.1	Murine-specific	15-qD1-4001.1	Murine-specific	chr10:86617132-86617157:+	TCTCTGTGTAGGCCTGACTGTACTG	chr15:59284272-59284312:-	TCTCTGTGTAGCCCTGGCTGTCCTGGAGCTCAACTTTGTA	188	3	14	1
10-qC1-875.1	Murine-specific	15-qD1-4001.1	Murine-specific	chr10:86617132-86617159:+	TCTCTGTGTAGGCCTGACTGTACTGGA	chr15:59284272-59284312:-	TCTCTGTGTAGCCCTGGCTGTCCTGGAGCTCAACTTTGTA	450	3	14	1
10-qC1-875.1	Murine-specific	15-qD1-4001.1	Murine-specific	chr10:86617132-86617161:+	TCTCTGTGTAGGCCTGACTGTACTGGAAC	chr15:59284272-59284312:-	TCTCTGTGTAGCCCTGGCTGTCCTGGAGCTCAACTTTGTA	487	3	14	1
10-qC1-875.1	Murine-specific	15-qD1-4001.1	Murine-specific	chr10:86617132-86617162:+	TCTCTGTGTAGGCCTGACTGTACTGGAACT	chr15:59284272-59284312:-	TCTCTGTGTAGCCCTGGCTGTCCTGGAGCTCAACTTTGTA	2891	3	14	1
2-qE1-35981.1	Eutherian	15-qD1-4001.1	Murine-specific	chr2:92580706-92580735:+	TCTCTGTGTTGCCTTGACTGTCCTGGAAT	chr15:59284272-59284312:-	TCTCTGTGTAGCCCTGGCTGTCCTGGAGCTCAACTTTGTA	160	1	14	1
2-qE1-35981.1	Eutherian	15-qD1-4001.1	Murine-specific	chr2:92580706-92580736:+	TCTCTGTGTTGCCTTGACTGTCCTGGAATT	chr15:59284272-59284312:-	TCTCTGTGTAGCCCTGGCTGTCCTGGAGCTCAACTTTGTA	209	1	14	1
9-qA5.3-1495.1	Murine-specific	9-qA5.3-24188.1	Eutherian	chr9:54250023-54250048:+	GTGAGTTCAAGGTCAGACAGAGTTC	chr9:54230025-54230065:+	ATGAGTTCAAGGTCAGCCTGGTCTACAAAGCAATCCTATG	51	1	34	1
2-qE1-35981.1	Eutherian	9-qA5.3-24188.1	Eutherian	chr2:92541952-92541981:+	TCACTCAGTAAGTGCTAGCTATTATCAGT	chr9:54238064-54238104:+	GCACTCAGTAAATGTTAGCTATTAAGGAAGGATAAATCCA	64	1	166	1
2-qE1-35981.1	Eutherian	9-qA5.3-24188.1	Eutherian	chr2:92541952-92541982:+	TCACTCAGTAAGTGCTAGCTATTATCAGTC	chr9:54238064-54238104:+	GCACTCAGTAAATGTTAGCTATTAAGGAAGGATAAATCCA	102	1	166	1
5-qG3-23659.1	Eutherian	9-qA5.3-24188.1	Eutherian	chr5:149816430-149816459:-	ACACTCAGTGAATGCTGGCCAGCAGCAGG	chr9:54238064-54238104:+	GCACTCAGTAAATGTTAGCTATTAAGGAAGGATAAATCCA	55	1	166	1
4-qD2.2-2182.1	Murine-specific	pi-Tmem194.1	Murine-specific	chr4:123836922-123836948:-	TAGAACCTTTGAGTTAGGGAGGCAGG	chr10:127697239-127697279:-	AAGAACCTCAGTGTTAGGAAGAAGGCAGCGGCAAATGAGA	34	1	17	1
15-qE1-8387.1	Eutherian	7-qD2-24830.1	Eutherian	chr15:78661017-78661047:-	TACAGAAAGCTGGCTGAGAGGCATGGTCCT	chr7:73790140-73790180:+	CACAGAAAGCAGGCTGTGCAGGGTCTATATTAAGAGTTGA	47	1	44	1
15-qE1-8387.1	Eutherian	7-qD2-24830.1	Eutherian	chr15:78661018-78661047:-	TACAGAAAGCTGGCTGAGAGGCATGGTCC	chr7:73790140-73790180:+	CACAGAAAGCAGGCTGTGCAGGGTCTATATTAAGAGTTGA	156	1	44	1
15-qE1-8387.1	Eutherian	7-qD2-24830.1	Eutherian	chr15:78661018-78661047:-	TACAGAAAGCTGGCTGAGAGGCATGGTCT	chr7:73790140-73790180:+	CACAGAAAGCAGGCTGTGCAGGGTCTATATTAAGAGTTGA	48	1	44	1
15-qE1-8387.1	Eutherian	7-qD2-24830.1	Eutherian	chr15:78661019-78661047:-	TACAGAAAGCTGGCTGAGAGGCATGGTC	chr7:73790140-73790180:+	CACAGAAAGCAGGCTGTGCAGGGTCTATATTAAGAGTTGA	157	1	44	1
15-qE1-8387.1	Eutherian	7-qD2-24830.1	Eutherian	chr15:78661020-78661047:-	TACAGAAAGCTGGCTGAGAGGCATGGT	chr7:73790140-73790180:+	CACAGAAAGCAGGCTGTGCAGGGTCTATATTAAGAGTTGA	44	1	44	1
15-qE1-8387.1	Eutherian	7-qD2-24830.1	Eutherian	chr15:78661021-78661047:-	TACAGAAAGCTGGCTGAGAGGCATGG	chr7:73790140-73790180:+	CACAGAAAGCAGGCTGTGCAGGGTCTATATTAAGAGTTGA	55	1	44	1
15-qE1-8387.1	Eutherian	7-qD2-24830.1	Eutherian	chr15:78661022-78661047:-	TACAGAAAGCTGGCTGAGAGGCATG	chr7:73790140-73790180:+	CACAGAAAGCAGGCTGTGCAGGGTCTATATTAAGAGTTGA	33	1	44	1
17-qA3.3-27363.1	Eutherian	8-qC5-2209.1	Mouse-specific	chr17:27305782-27305813:-	TGACCTTGAACTCCCAAGTCTCTTCCCCTCT	chr8:93418742-93418782:+	TGACCTTGAATCACCACGTCTAGTGTGAATAAGAGATCCT	81	1	37	1
17-qA3.3-27363.1	Eutherian	8-qC5-2209.1	Mouse-specific	chr17:27305784-27305813:-	TGACCTTGAACTCCCAAGTCTCTTCCCCT	chr8:93418742-93418782:+	TGACCTTGAATCACCACGTCTAGTGTGAATAAGAGATCCT	178	1	37	1
17-qA3.3-27363.1	Eutherian	8-qC5-2209.1	Mouse-specific	chr17:27305785-27305813:-	TGACCTTGAACTCCCAAGTCTCTTCCCC	chr8:93418742-93418782:+	TGACCTTGAATCACCACGTCTAGTGTGAATAAGAGATCCT	149	1	37	1
17-qA3.3-27363.1	Eutherian	8-qC5-2209.1	Mouse-specific	chr17:27305785-27305813:-	TGACCTTGAACTCCCAAGTCTCTTCCCT	chr8:93418742-93418782:+	TGACCTTGAATCACCACGTCTAGTGTGAATAAGAGATCCT	82	1	37	1
17-qA3.3-27363.1	Eutherian	8-qC5-2209.1	Mouse-specific	chr17:27305786-27305813:-	TGACCTTGAACTCCCAAGTCTCTTCCC	chr8:93418742-93418782:+	TGACCTTGAATCACCACGTCTAGTGTGAATAAGAGATCCT	142	1	37	1
17-qA3.3-27363.1	Eutherian	8-qC5-2209.1	Mouse-specific	chr17:27305786-27305813:-	TGACCTTGAACTCCCAAGTCTCTTCCT	chr8:93418742-93418782:+	TGACCTTGAATCACCACGTCTAGTGTGAATAAGAGATCCT	93	1	37	1
17-qA3.3-27363.1	Eutherian	8-qC5-2209.1	Mouse-specific	chr17:27305787-27305813:-	TGACCTTGAACTCCCAAGTCTCTTCC	chr8:93418742-93418782:+	TGACCTTGAATCACCACGTCTAGTGTGAATAAGAGATCCT	129	1	37	1
17-qA3.3-27363.1	Eutherian	8-qC5-2209.1	Mouse-specific	chr17:27305787-27305813:-	TGACCTTGAACTCCCAAGTCTCTTCT	chr8:93418742-93418782:+	TGACCTTGAATCACCACGTCTAGTGTGAATAAGAGATCCT	85	1	37	1
17-qA3.3-27363.1	Eutherian	8-qC5-2209.1	Mouse-specific	chr17:27305788-27305813:-	TGACCTTGAACTCCCAAGTCTCTTC	chr8:93418742-93418782:+	TGACCTTGAATCACCACGTCTAGTGTGAATAAGAGATCCT	35	1	37	1
4-qC5-17839.1	Eutherian	8-qC5-2209.1	Mouse-specific	chr4:94321100-94321130:-	TGACCTTGAATGACCCCTTCTTCACGCAGC	chr8:93418742-93418782:+	TGACCTTGAATCACCACGTCTAGTGTGAATAAGAGATCCT	31	1	37	1
4-qC5-17839.1	Eutherian	8-qC5-2209.1	Mouse-specific	chr4:94321103-94321130:-	TGACCTTGAATGACCCCTTCTTCACGC	chr8:93418742-93418782:+	TGACCTTGAATCACCACGTCTAGTGTGAATAAGAGATCCT	61	1	37	1
9-qA5.3-24188.1	Eutherian	3-qA3-2052.1	Eutherian	chr9:54238045-54238075:-	TTACTGAGTGCTTACTATGTGCCAGGCACT	chr3:34874930-34874970:-	GTACTGAATGCTTACTGTATGCTAGCATTAGGAGGCAAAA	34	1	15	1
7-qD1-16444.1	Eutherian	5-qF-4633.1	Murine-specific	chr7:69916569-69916595:+	TGGATTCAGGGTCTGGGGACTAGGAT	chr5:114848898-114848938:+	AGGATTCAGAGTGTGAGGAGTTCCGGGGTCAGGGCTGAGG	62	1	16	1
15-qD3-14639.1	Murine-specific	10-qC1-12816.1	Murine-specific	chr15:74657300-74657328:+	TCTGAGTTTGACGCCAGGCTAGTCTTCT	chr10:75852354-75852394:-	TCTGAGTTCGAGGCCAGCCTGGACTACGCGAGTTCCAGGA	38	1	25	1
15-qD3-14639.1	Murine-specific	10-qC1-12816.1	Murine-specific	chr15:74657300-74657330:+	TCTGAGTTTGACGCCAGGCTAGTCTTCTGT	chr10:75852354-75852394:-	TCTGAGTTCGAGGCCAGCCTGGACTACGCGAGTTCCAGGA	99	1	25	1
9-qC-10667.1	Eutherian	10-qC1-12816.1	Murine-specific	chr9:67742127-67742156:+	TCTGAGTTCAAGGACAGCCTGGTCTAAAA	chr10:75852354-75852394:-	TCTGAGTTCGAGGCCAGCCTGGACTACGCGAGTTCCAGGA	110	3	25	1
17-qA3.3-27363.1	Eutherian	14-qA3-3095.1	Mouse-specific	chr17:27297330-27297360:-	TTTAATCCCAGCACTCACGCAGAAAAGGCA	chr14:19638164-19638204:+	TTTAATCCCAGCATTCAAGAAACAGAACCATGCAGATCTC	34	1	91	1
2-qE1-35981.1	Eutherian	14-qA3-19970.1	Murine-specific	chr2:92576652-92576679:+	TAGATAGATGGGAAAAGCTGCGGCTTG	chr14:24116320-24116360:-	AAGATAGATGGGAAAGACTGAAGCCTGGAGGTGAGGCCTC	83	1	55	1
2-qE1-35981.1	Eutherian	14-qA3-19970.1	Murine-specific	chr2:92576652-92576681:+	TAGATAGATGGGAAAAGCTGCGGCTTGGC	chr14:24116320-24116360:-	AAGATAGATGGGAAAGACTGAAGCCTGGAGGTGAGGCCTC	123	1	55	1
2-qE1-35981.1	Eutherian	14-qA3-19970.1	Murine-specific	chr2:92576652-92576682:+	TAGATAGATGGGAAAAGCTGCGGCTTGGCA	chr14:24116320-24116360:-	AAGATAGATGGGAAAGACTGAAGCCTGGAGGTGAGGCCTC	74	1	55	1
2-qE1-35981.1	Eutherian	2-qE1-35981.1	Eutherian	chr2:92595738-92595766:+	TGAGACCAGAGGTTAGAGGTTACAGCTG	chr2:92554359-92554399:-	AGAGACCTGAGGTTAGAGACACCAAACTGAACTGAATGGG	131	1	21	1
2-qE1-35981.1	Eutherian	2-qE1-35981.1	Eutherian	chr2:92595738-92595768:+	TGAGACCAGAGGTTAGAGGTTACAGCTGCC	chr2:92554359-92554399:-	AGAGACCTGAGGTTAGAGACACCAAACTGAACTGAATGGG	34	1	21	1
6-qF3-28913.1	Murine-specific	10-qA3-143.1	Murine-specific	chr6:127830350-127830374:+	TATCAGGATCCATTGGTCTGTCCA	chr10:20311583-20311623:+	AATCAGGATTCATTGGTCAGTCAGGTACTTCCTCCACTGT	49	1	59	1
6-qF3-28913.1	Murine-specific	10-qA3-143.1	Murine-specific	chr6:127830350-127830376:+	TATCAGGATCCATTGGTCTGTCCAGG	chr10:20311583-20311623:+	AATCAGGATTCATTGGTCAGTCAGGTACTTCCTCCACTGT	60	1	59	1
6-qF3-28913.1	Murine-specific	10-qA3-143.1	Murine-specific	chr6:127830350-127830377:+	TATCAGGATCCATTGGTCTGTCCAGGA	chr10:20311583-20311623:+	AATCAGGATTCATTGGTCAGTCAGGTACTTCCTCCACTGT	53	1	59	1
6-qF3-28913.1	Murine-specific	10-qA3-143.1	Murine-specific	chr6:127830350-127830378:+	TATCAGGATCCATTGGTCTGTCCAGGAC	chr10:20311583-20311623:+	AATCAGGATTCATTGGTCAGTCAGGTACTTCCTCCACTGT	206	1	59	1
6-qF3-28913.1	Murine-specific	10-qA3-143.1	Murine-specific	chr6:127830350-127830379:+	TATCAGGATCCATTGGTCTGTCCAGGACT	chr10:20311583-20311623:+	AATCAGGATTCATTGGTCAGTCAGGTACTTCCTCCACTGT	185	1	59	1
6-qF3-28913.1	Murine-specific	10-qA3-143.1	Murine-specific	chr6:127830350-127830379:+	TATCAGGATCCATTGGTCTGTCCAGGACA	chr10:20311583-20311623:+	AATCAGGATTCATTGGTCAGTCAGGTACTTCCTCCACTGT	532	1	59	1
6-qF3-28913.1	Murine-specific	10-qA3-143.1	Murine-specific	chr6:127830350-127830380:+	TATCAGGATCCATTGGTCTGTCCAGGACAT	chr10:20311583-20311623:+	AATCAGGATTCATTGGTCAGTCAGGTACTTCCTCCACTGT	128	1	59	1
6-qF3-28913.1	Murine-specific	10-qA3-143.1	Murine-specific	chr6:127830350-127830380:+	TATCAGGATCCATTGGTCTGTCCAGGACAC	chr10:20311583-20311623:+	AATCAGGATTCATTGGTCAGTCAGGTACTTCCTCCACTGT	1425	1	59	1
6-qF3-28913.1	Murine-specific	10-qA3-143.1	Murine-specific	chr6:127830350-127830381:+	TATCAGGATCCATTGGTCTGTCCAGGACACA	chr10:20311583-20311623:+	AATCAGGATTCATTGGTCAGTCAGGTACTTCCTCCACTGT	53	1	59	1
6-qF3-28913.1	Murine-specific	10-qA3-143.1	Murine-specific	chr6:127830350-127830381:+	TATCAGGATCCATTGGTCTGTCCAGGACACT	chr10:20311583-20311623:+	AATCAGGATTCATTGGTCAGTCAGGTACTTCCTCCACTGT	654	1	59	1
9-qC-31469.1	Murine-specific	9-qC-10667.1	Eutherian	chr9:67722358-67722388:-	TGAATCTCTGAGGACTATCCCATAATGTCT	chr9:67738949-67738989:-	AGAATCTCTGAAGATTATCCAGGTCACATCTCTCTTTTCA	723	1	47	1
9-qC-31469.1	Murine-specific	9-qC-10667.1	Eutherian	chr9:67722360-67722388:-	TGAATCTCTGAGGACTATCCCATAATGT	chr9:67738949-67738989:-	AGAATCTCTGAAGATTATCCAGGTCACATCTCTCTTTTCA	34	1	47	1
7-qD1-9417.1	Murine-specific	8-qC5-2209.1	Mouse-specific	chr7:69903830-69903860:-	TGAAATCTGAGTGGGCTCTACTTCTTCATT	chr8:93418718-93418758:+	AGAAATCTGAGTGGTTTCTGACTTTGACCTTGAATCACCA	74	1	16	1
7-qD1-9417.1	Murine-specific	8-qC5-2209.1	Mouse-specific	chr7:69903834-69903860:-	TGAAATCTGAGTGGGCTCTACTTCTT	chr8:93418718-93418758:+	AGAAATCTGAGTGGTTTCTGACTTTGACCTTGAATCACCA	33	1	16	1
7-qD1-9417.1	Murine-specific	8-qC5-2209.1	Mouse-specific	chr7:69903835-69903860:-	TGAAATCTGAGTGGGCTCTACTTCT	chr8:93418718-93418758:+	AGAAATCTGAGTGGTTTCTGACTTTGACCTTGAATCACCA	92	1	16	1
7-qD1-9417.1	Murine-specific	8-qC5-2209.1	Mouse-specific	chr7:69903836-69903860:-	TGAAATCTGAGTGGGCTCTACTTC	chr8:93418718-93418758:+	AGAAATCTGAGTGGTTTCTGACTTTGACCTTGAATCACCA	40	1	16	1
11-qE1-9443.1	Murine-specific	6-qF3-28913.1	Murine-specific	chr11:103434470-103434499:+	TTGCAAAGTGGCAAGGAAACCTTATTCAG	chr6:127835740-127835780:-	CTGCAAAGTAGCAAGGAGTCTTTACTCGGTGCTCACACAA	381	1	84	1
11-qE1-9443.1	Murine-specific	6-qF3-28913.1	Murine-specific	chr11:103434470-103434500:+	TTGCAAAGTGGCAAGGAAACCTTATTCAGT	chr6:127835740-127835780:-	CTGCAAAGTAGCAAGGAGTCTTTACTCGGTGCTCACACAA	71	1	84	1
11-qE1-9443.1	Murine-specific	6-qF3-28913.1	Murine-specific	chr11:103434470-103434500:+	TTGCAAAGTGGCAAGGAAACCTTATTCAGA	chr6:127835740-127835780:-	CTGCAAAGTAGCAAGGAGTCTTTACTCGGTGCTCACACAA	809	1	84	1
11-qE1-9443.1	Murine-specific	6-qF3-28913.1	Murine-specific	chr11:103434470-103434501:+	TTGCAAAGTGGCAAGGAAACCTTATTCAGAA	chr6:127835740-127835780:-	CTGCAAAGTAGCAAGGAGTCTTTACTCGGTGCTCACACAA	39	1	84	1
11-qE1-9443.1	Murine-specific	6-qF3-28913.1	Murine-specific	chr11:103434470-103434501:+	TTGCAAAGTGGCAAGGAAACCTTATTCAGAT	chr6:127835740-127835780:-	CTGCAAAGTAGCAAGGAGTCTTTACTCGGTGCTCACACAA	46	1	84	1
11-qE1-9443.1	Murine-specific	6-qF3-28913.1	Murine-specific	chr11:103434470-103434501:+	TTGCAAAGTGGCAAGGAAACCTTATTCAGAG	chr6:127835740-127835780:-	CTGCAAAGTAGCAAGGAGTCTTTACTCGGTGCTCACACAA	610	1	84	1
11-qE1-9443.1	Murine-specific	6-qF3-28913.1	Murine-specific	chr11:103434470-103434502:+	TTGCAAAGTGGCAAGGAAACCTTATTCAGAGA	chr6:127835740-127835780:-	CTGCAAAGTAGCAAGGAGTCTTTACTCGGTGCTCACACAA	71	1	84	1
11-qE1-9443.1	Murine-specific	6-qF3-28913.1	Murine-specific	chr11:103434470-103434502:+	TTGCAAAGTGGCAAGGAAACCTTATTCAGAGT	chr6:127835740-127835780:-	CTGCAAAGTAGCAAGGAGTCTTTACTCGGTGCTCACACAA	79	1	84	1
15-qE1-8387.1	Eutherian	8-qE1-3748.1	Murine-specific	chr15:78658976-78659003:-	TGATCATTGGGAAGCTTCCAGAAACCT	chr8:110126942-110126982:-	AGATCATTGGGAAGGAGCCAAAAACCACAGGCAAAGAGAG	32	1	16	1
7-qD1-16444.1	Eutherian	7-qD1-9417.1	Murine-specific	chr7:69919786-69919813:+	TGAGAAACAGTGTCTTTTCCTCTACAA	chr7:69907674-69907714:+	TGAGAAACAGTGTCTTGCCCTCTAGGAACTCAAGGAAAGT	67	1	105	1
7-qD1-16444.1	Eutherian	7-qD1-9417.1	Murine-specific	chr7:69919786-69919815:+	TGAGAAACAGTGTCTTTTCCTCTACAAGC	chr7:69907674-69907714:+	TGAGAAACAGTGTCTTGCCCTCTAGGAACTCAAGGAAAGT	5604	1	105	1
7-qD1-16444.1	Eutherian	7-qD1-9417.1	Murine-specific	chr7:69919786-69919816:+	TGAGAAACAGTGTCTTTTCCTCTACAAGCT	chr7:69907674-69907714:+	TGAGAAACAGTGTCTTGCCCTCTAGGAACTCAAGGAAAGT	313	1	105	1
7-qD1-16444.1	Eutherian	7-qD1-9417.1	Murine-specific	chr7:69919786-69919816:+	TGAGAAACAGTGTCTTTTCCTCTACAAGCA	chr7:69907674-69907714:+	TGAGAAACAGTGTCTTGCCCTCTAGGAACTCAAGGAAAGT	935	1	105	1
7-qD1-16444.1	Eutherian	7-qD1-9417.1	Murine-specific	chr7:69919786-69919817:+	TGAGAAACAGTGTCTTTTCCTCTACAAGCAC	chr7:69907674-69907714:+	TGAGAAACAGTGTCTTGCCCTCTAGGAACTCAAGGAAAGT	65	1	105	1
12-qE-7089.1	Eutherian	13-qA3.1-355.1	Mouse-specific	chr12:98446259-98446283:+	TAGGACCCTGGATGATTCCCAAAA	chr13:24906193-24906233:-	GAGGACCCTGGGTGATTCCCCCAGCGCTGCTCAGAGGGCC	63	1	42	1
12-qE-7089.1	Eutherian	13-qA3.1-355.1	Mouse-specific	chr12:98446259-98446284:+	TAGGACCCTGGATGATTCCCAAAAG	chr13:24906193-24906233:-	GAGGACCCTGGGTGATTCCCCCAGCGCTGCTCAGAGGGCC	141	1	42	1
12-qE-7089.1	Eutherian	13-qA3.1-355.1	Mouse-specific	chr12:98446259-98446285:+	TAGGACCCTGGATGATTCCCAAAAGC	chr13:24906193-24906233:-	GAGGACCCTGGGTGATTCCCCCAGCGCTGCTCAGAGGGCC	384	1	42	1
12-qE-7089.1	Eutherian	13-qA3.1-355.1	Mouse-specific	chr12:98446259-98446286:+	TAGGACCCTGGATGATTCCCAAAAGCA	chr13:24906193-24906233:-	GAGGACCCTGGGTGATTCCCCCAGCGCTGCTCAGAGGGCC	81	1	42	1
12-qE-7089.1	Eutherian	13-qA3.1-355.1	Mouse-specific	chr12:98446259-98446287:+	TAGGACCCTGGATGATTCCCAAAAGCAG	chr13:24906193-24906233:-	GAGGACCCTGGGTGATTCCCCCAGCGCTGCTCAGAGGGCC	85	1	42	1
12-qE-7089.1	Eutherian	13-qA3.1-355.1	Mouse-specific	chr12:98446259-98446288:+	TAGGACCCTGGATGATTCCCAAAAGCAGC	chr13:24906193-24906233:-	GAGGACCCTGGGTGATTCCCCCAGCGCTGCTCAGAGGGCC	215	1	42	1
12-qE-7089.1	Eutherian	13-qA3.1-355.1	Mouse-specific	chr12:98446259-98446288:+	TAGGACCCTGGATGATTCCCAAAAGCAGT	chr13:24906193-24906233:-	GAGGACCCTGGGTGATTCCCCCAGCGCTGCTCAGAGGGCC	36	1	42	1
12-qE-7089.1	Eutherian	13-qA3.1-355.1	Mouse-specific	chr12:98446259-98446289:+	TAGGACCCTGGATGATTCCCAAAAGCAGCT	chr13:24906193-24906233:-	GAGGACCCTGGGTGATTCCCCCAGCGCTGCTCAGAGGGCC	250	1	42	1
12-qE-7089.1	Eutherian	13-qA3.1-355.1	Mouse-specific	chr12:98446259-98446290:+	TAGGACCCTGGATGATTCCCAAAAGCAGCTT	chr13:24906193-24906233:-	GAGGACCCTGGGTGATTCCCCCAGCGCTGCTCAGAGGGCC	50	1	42	1
12-qE-7089.1	Eutherian	13-qA3.1-355.1	Mouse-specific	chr12:98446259-98446291:+	TAGGACCCTGGATGATTCCCAAAAGCAGCTTT	chr13:24906193-24906233:-	GAGGACCCTGGGTGATTCCCCCAGCGCTGCTCAGAGGGCC	52	1	42	1
10-qC1-12816.1	Murine-specific	4-qB3-3994.1	Murine-specific	chr10:75855400-75855431:+	AATAAATCCATTTTTCTTCACCAATAGGGAT	chr4:57357156-57357196:+	AATAAATCCATTTTTCTTTATCAATTTTGATTACCAACTA	121	1	78	1
15-qD1-17920.1	Eutherian	1-qD-2017.1	Murine-specific	chr15:59269200-59269230:-	TTGGTTGGAATCCAGTGGGAACGACATCAT	chr1:91404946-91404986:+	CTGGTTGGAATCCAGCAAGACCCACATCTTGTCTGCTCTT	73	1	119	1
15-qD1-17920.1	Eutherian	1-qD-2017.1	Murine-specific	chr15:59269202-59269230:-	TTGGTTGGAATCCAGTGGGAACGACATC	chr1:91404946-91404986:+	CTGGTTGGAATCCAGCAAGACCCACATCTTGTCTGCTCTT	47	1	119	1
5-qG2-2301.1	Mouse-specific	5-qG2-950.1	Murine-specific	chr5:143765440-143765470:+	TCTGAATCTGAATGTCTGCTCATTCTCATT	chr5:136936630-136936670:-	GCTGAATGTGGTTGTCTGCTGGGAGAGAGGGCTACAAGAG	58	1	24	1
10-qC1-875.1	Murine-specific	2-qE1-35981.1	Eutherian	chr10:86618910-86618940:+	TTCATTCATTCACTCACTCATTCATTCTCT	chr2:92567990-92568030:-	TTCATTCATTCATTCATTCGTTTGTTCGTTCTTTGAGGTC	93	1	22	1
10-qC1-875.1	Murine-specific	2-qE1-35981.1	Eutherian	chr10:86618910-86618941:+	TTCATTCATTCACTCACTCATTCATTCTCTC	chr2:92567990-92568030:-	TTCATTCATTCATTCATTCGTTTGTTCGTTCTTTGAGGTC	65	1	22	1
10-qC1-875.1	Murine-specific	2-qE1-35981.1	Eutherian	chr10:86618910-86618942:+	TTCATTCATTCACTCACTCATTCATTCTCTCC	chr2:92567990-92568030:-	TTCATTCATTCATTCATTCGTTTGTTCGTTCTTTGAGGTC	129	1	22	1
10-qC1-875.1	Murine-specific	2-qE1-35981.1	Eutherian	chr10:86618914-86618943:+	TTCATTCACTCACTCATTCATTCTCTCCC	chr2:92567990-92568030:-	TTCATTCATTCATTCATTCGTTTGTTCGTTCTTTGAGGTC	33	1	22	1
10-qC1-875.1	Murine-specific	2-qE1-35981.1	Eutherian	chr10:86618914-86618944:+	TTCATTCACTCACTCATTCATTCTCTCCCT	chr2:92567990-92568030:-	TTCATTCATTCATTCATTCGTTTGTTCGTTCTTTGAGGTC	561	1	22	1
10-qC1-875.1	Murine-specific	2-qE1-35981.1	Eutherian	chr10:86618914-86618945:+	TTCATTCACTCACTCATTCATTCTCTCCCTC	chr2:92567990-92568030:-	TTCATTCATTCATTCATTCGTTTGTTCGTTCTTTGAGGTC	50	1	22	1
17-qE1.1-7037.1	Mouse-specific	2-qE1-35981.1	Eutherian	chr17:66208699-66208729:+	TTCATTCATTCATTCATCCATACATTCTCT	chr2:92567990-92568030:-	TTCATTCATTCATTCATTCGTTTGTTCGTTCTTTGAGGTC	35	1	22	1
17-qE1.1-7037.1	Mouse-specific	2-qE1-35981.1	Eutherian	chr17:66208703-66208733:+	TTCATTCATTCATCCATACATTCTCTCTCT	chr2:92567990-92568030:-	TTCATTCATTCATTCATTCGTTTGTTCGTTCTTTGAGGTC	295	2	22	1
17-qE1.1-7037.1	Mouse-specific	2-qE1-35981.1	Eutherian	chr17:66208703-66208734:+	TTCATTCATTCATCCATACATTCTCTCTCTC	chr2:92567990-92568030:-	TTCATTCATTCATTCATTCGTTTGTTCGTTCTTTGAGGTC	91	2	22	1
17-qE1.1-7037.1	Mouse-specific	2-qE1-35981.1	Eutherian	chr17:66208703-66208735:+	TTCATTCATTCATCCATACATTCTCTCTCTCT	chr2:92567990-92568030:-	TTCATTCATTCATTCATTCGTTTGTTCGTTCTTTGAGGTC	91	2	22	1
17-qE1.1-7037.1	Mouse-specific	2-qE1-35981.1	Eutherian	chr17:66208707-66208735:+	TTCATTCATCCATACATTCTCTCTCTCT	chr2:92567990-92568030:-	TTCATTCATTCATTCATTCGTTTGTTCGTTCTTTGAGGTC	95	2	22	1
17-qE1.1-7037.1	Mouse-specific	2-qE1-35981.1	Eutherian	chr17:66208707-66208736:+	TTCATTCATCCATACATTCTCTCTCTCTC	chr2:92567990-92568030:-	TTCATTCATTCATTCATTCGTTTGTTCGTTCTTTGAGGTC	71	2	22	1
17-qE1.1-7037.1	Mouse-specific	2-qE1-35981.1	Eutherian	chr17:66208707-66208737:+	TTCATTCATCCATACATTCTCTCTCTCTCC	chr2:92567990-92568030:-	TTCATTCATTCATTCATTCGTTTGTTCGTTCTTTGAGGTC	942	1	22	1
17-qE1.1-7037.1	Mouse-specific	2-qE1-35981.1	Eutherian	chr17:66208707-66208738:+	TTCATTCATCCATACATTCTCTCTCTCTCCT	chr2:92567990-92568030:-	TTCATTCATTCATTCATTCGTTTGTTCGTTCTTTGAGGTC	127	1	22	1
17-qE1.1-7037.1	Mouse-specific	2-qE1-35981.1	Eutherian	chr17:66208707-66208738:+	TTCATTCATCCATACATTCTCTCTCTCTCCC	chr2:92567990-92568030:-	TTCATTCATTCATTCATTCGTTTGTTCGTTCTTTGAGGTC	81	1	22	1
17-qE1.1-7037.1	Mouse-specific	2-qE1-35981.1	Eutherian	chr17:66208707-66208739:+	TTCATTCATCCATACATTCTCTCTCTCTCCCT	chr2:92567990-92568030:-	TTCATTCATTCATTCATTCGTTTGTTCGTTCTTTGAGGTC	31	1	22	1
17-qE1.1-7037.1	Mouse-specific	2-qE1-35981.1	Eutherian	chr17:66208707-66208739:+	TTCATTCATCCATACATTCTCTCTCTCTCCCC	chr2:92567990-92568030:-	TTCATTCATTCATTCATTCGTTTGTTCGTTCTTTGAGGTC	41	1	22	1
7-qD1-654.1	Murine-specific	2-qE1-35981.1	Eutherian	chr7:73104560-73104590:-	TTCATTCATTCTTTCTTTCGTTCATTCGTT	chr2:92567990-92568030:-	TTCATTCATTCATTCATTCGTTTGTTCGTTCTTTGAGGTC	266	1	22	1
7-qD1-654.1	Murine-specific	2-qE1-35981.1	Eutherian	chr7:73104561-73104590:-	TTCATTCATTCTTTCTTTCGTTCATTCGT	chr2:92567990-92568030:-	TTCATTCATTCATTCATTCGTTTGTTCGTTCTTTGAGGTC	93	1	22	1
9-qC-31469.1	Murine-specific	14-qA3-19970.1	Murine-specific	chr9:67718877-67718902:-	TGAAAGAAGGACAAAAGCAAGAATA	chr14:24092513-24092553:-	TGAAAGAAAGACAGAAGCAAAAATAAGTCATAAGAGCAGG	36	1	58	1
10-qB4-6488.1	Murine-specific	10-qC1-12816.1	Murine-specific	chr10:62676286-62676316:+	TTTAATCCCAGTTCTCGGGAGTTTGAGAGC	chr10:75847849-75847889:-	TTTAATCCCAGCACTCGGGAGGCAGAGGCAGGTGGATTTC	40	1	105	1
10-qB4-6488.1	Murine-specific	10-qC1-12816.1	Murine-specific	chr10:62688647-62688673:+	TTTAATCTTAGCACTGGGGAGACTGA	chr10:75847849-75847889:-	TTTAATCCCAGCACTCGGGAGGCAGAGGCAGGTGGATTTC	42	1	105	1
10-qB4-6488.1	Murine-specific	10-qC1-12816.1	Murine-specific	chr10:62688647-62688675:+	TTTAATCTTAGCACTGGGGAGACTGAGT	chr10:75847849-75847889:-	TTTAATCCCAGCACTCGGGAGGCAGAGGCAGGTGGATTTC	47	1	105	1
10-qB4-6488.1	Murine-specific	10-qC1-12816.1	Murine-specific	chr10:62688647-62688675:+	TTTAATCTTAGCACTGGGGAGACTGAGA	chr10:75847849-75847889:-	TTTAATCCCAGCACTCGGGAGGCAGAGGCAGGTGGATTTC	75	1	105	1
10-qB4-6488.1	Murine-specific	10-qC1-12816.1	Murine-specific	chr10:62688647-62688676:+	TTTAATCTTAGCACTGGGGAGACTGAGAT	chr10:75847849-75847889:-	TTTAATCCCAGCACTCGGGAGGCAGAGGCAGGTGGATTTC	181	1	105	1
11-qE1-9443.1	Murine-specific	10-qC1-12816.1	Murine-specific	chr11:103447005-103447031:+	TTTAATCCCAGGACCCGGAAAGCAAA	chr10:75847849-75847889:-	TTTAATCCCAGCACTCGGGAGGCAGAGGCAGGTGGATTTC	55	1	105	1
11-qE1-9443.1	Murine-specific	10-qC1-12816.1	Murine-specific	chr11:103447005-103447032:+	TTTAATCCCAGGACCCGGAAAGCAAAG	chr10:75847849-75847889:-	TTTAATCCCAGCACTCGGGAGGCAGAGGCAGGTGGATTTC	72	1	105	1
11-qE1-9443.1	Murine-specific	10-qC1-12816.1	Murine-specific	chr11:103447005-103447033:+	TTTAATCCCAGGACCCGGAAAGCAAAGG	chr10:75847849-75847889:-	TTTAATCCCAGCACTCGGGAGGCAGAGGCAGGTGGATTTC	61	1	105	1
11-qE1-9443.1	Murine-specific	10-qC1-12816.1	Murine-specific	chr11:103447005-103447033:+	TTTAATCCCAGGACCCGGAAAGCAAAGT	chr10:75847849-75847889:-	TTTAATCCCAGCACTCGGGAGGCAGAGGCAGGTGGATTTC	63	1	105	1
11-qE1-9443.1	Murine-specific	10-qC1-12816.1	Murine-specific	chr11:103447005-103447034:+	TTTAATCCCAGGACCCGGAAAGCAAAGGC	chr10:75847849-75847889:-	TTTAATCCCAGCACTCGGGAGGCAGAGGCAGGTGGATTTC	348	1	105	1
11-qE1-9443.1	Murine-specific	10-qC1-12816.1	Murine-specific	chr11:103447005-103447035:+	TTTAATCCCAGGACCCGGAAAGCAAAGGCA	chr10:75847849-75847889:-	TTTAATCCCAGCACTCGGGAGGCAGAGGCAGGTGGATTTC	192	1	105	1
11-qE1-9443.1	Murine-specific	10-qC1-12816.1	Murine-specific	chr11:103447005-103447036:+	TTTAATCCCAGGACCCGGAAAGCAAAGGCAG	chr10:75847849-75847889:-	TTTAATCCCAGCACTCGGGAGGCAGAGGCAGGTGGATTTC	53	1	105	1
11-qE1-9443.1	Murine-specific	10-qC1-12816.1	Murine-specific	chr11:103447005-103447037:+	TTTAATCCCAGGACCCGGAAAGCAAAGGCAGT	chr10:75847849-75847889:-	TTTAATCCCAGCACTCGGGAGGCAGAGGCAGGTGGATTTC	33	1	105	1
15-qD3-14639.1	Murine-specific	10-qC1-12816.1	Murine-specific	chr15:74657262-74657288:+	TTTAATCACAGCACTAGGGAAACAGA	chr10:75847849-75847889:-	TTTAATCCCAGCACTCGGGAGGCAGAGGCAGGTGGATTTC	65	2	105	1
15-qD3-14639.1	Murine-specific	10-qC1-12816.1	Murine-specific	chr15:74657262-74657289:+	TTTAATCACAGCACTAGGGAAACAGAA	chr10:75847849-75847889:-	TTTAATCCCAGCACTCGGGAGGCAGAGGCAGGTGGATTTC	149	1	105	1
15-qD3-14639.1	Murine-specific	10-qC1-12816.1	Murine-specific	chr15:74657262-74657290:+	TTTAATCACAGCACTAGGGAAACAGAAG	chr10:75847849-75847889:-	TTTAATCCCAGCACTCGGGAGGCAGAGGCAGGTGGATTTC	378	1	105	1
15-qD3-14639.1	Murine-specific	10-qC1-12816.1	Murine-specific	chr15:74657262-74657291:+	TTTAATCACAGCACTAGGGAAACAGAAGC	chr10:75847849-75847889:-	TTTAATCCCAGCACTCGGGAGGCAGAGGCAGGTGGATTTC	1836	1	105	1
15-qD3-14639.1	Murine-specific	10-qC1-12816.1	Murine-specific	chr15:74657262-74657291:+	TTTAATCACAGCACTAGGGAAACAGAAGT	chr10:75847849-75847889:-	TTTAATCCCAGCACTCGGGAGGCAGAGGCAGGTGGATTTC	81	1	105	1
15-qD3-14639.1	Murine-specific	10-qC1-12816.1	Murine-specific	chr15:74657262-74657292:+	TTTAATCACAGCACTAGGGAAACAGAAGCT	chr10:75847849-75847889:-	TTTAATCCCAGCACTCGGGAGGCAGAGGCAGGTGGATTTC	1523	1	105	1
15-qD3-14639.1	Murine-specific	10-qC1-12816.1	Murine-specific	chr15:74657262-74657293:+	TTTAATCACAGCACTAGGGAAACAGAAGCTT	chr10:75847849-75847889:-	TTTAATCCCAGCACTCGGGAGGCAGAGGCAGGTGGATTTC	195	1	105	1
17-qA3.3-27363.1	Eutherian	10-qC1-12816.1	Murine-specific	chr17:27297330-27297360:-	TTTAATCCCAGCACTCACGCAGAAAAGGCA	chr10:75847849-75847889:-	TTTAATCCCAGCACTCGGGAGGCAGAGGCAGGTGGATTTC	34	1	105	1
5-qF-14224.1	Eutherian	10-qC1-12816.1	Murine-specific	chr5:113343582-113343610:+	TTTAATCCCAGCTCTTGGGAGGCGGAGG	chr10:75847849-75847889:-	TTTAATCCCAGCACTCGGGAGGCAGAGGCAGGTGGATTTC	253	4	105	1
5-qF-14224.1	Eutherian	10-qC1-12816.1	Murine-specific	chr5:113343582-113343611:+	TTTAATCCCAGCTCTTGGGAGGCGGAGGC	chr10:75847849-75847889:-	TTTAATCCCAGCACTCGGGAGGCAGAGGCAGGTGGATTTC	174	4	105	1
9-qA5.3-1495.1	Murine-specific	10-qC1-12816.1	Murine-specific	chr9:54249982-54250008:+	TTTAATCTCAGCACCGTGGAGGCAGA	chr10:75847849-75847889:-	TTTAATCCCAGCACTCGGGAGGCAGAGGCAGGTGGATTTC	47	1	105	1
9-qA5.3-1495.1	Murine-specific	10-qC1-12816.1	Murine-specific	chr9:54249982-54250011:+	TTTAATCTCAGCACCGTGGAGGCAGAGGC	chr10:75847849-75847889:-	TTTAATCCCAGCACTCGGGAGGCAGAGGCAGGTGGATTTC	60	1	105	1
9-qA5.3-1495.1	Murine-specific	10-qC1-12816.1	Murine-specific	chr9:54249982-54250012:+	TTTAATCTCAGCACCGTGGAGGCAGAGGCT	chr10:75847849-75847889:-	TTTAATCCCAGCACTCGGGAGGCAGAGGCAGGTGGATTTC	41	1	105	1
9-qC-31469.1	Murine-specific	17-qE1.1-7037.1	Mouse-specific	chr9:67725109-67725140:-	TAGGATTCTCAGAATATGATCAAGGCCATCC	chr17:66209364-66209404:-	AAGGATTCCCAGAAACTGATCTCACTACTACTGTGCTCAT	121	1	22	1
9-qC-31469.1	Murine-specific	17-qE1.1-7037.1	Mouse-specific	chr9:67725110-67725140:-	TAGGATTCTCAGAATATGATCAAGGCCATC	chr17:66209364-66209404:-	AAGGATTCCCAGAAACTGATCTCACTACTACTGTGCTCAT	591	1	22	1
9-qC-31469.1	Murine-specific	17-qE1.1-7037.1	Mouse-specific	chr9:67725112-67725140:-	TAGGATTCTCAGAATATGATCAAGGCCT	chr17:66209364-66209404:-	AAGGATTCCCAGAAACTGATCTCACTACTACTGTGCTCAT	62	1	22	1
9-qC-31469.1	Murine-specific	17-qE1.1-7037.1	Mouse-specific	chr9:67725113-67725140:-	TAGGATTCTCAGAATATGATCAAGGCC	chr17:66209364-66209404:-	AAGGATTCCCAGAAACTGATCTCACTACTACTGTGCTCAT	1661	1	22	1
9-qC-31469.1	Murine-specific	17-qE1.1-7037.1	Mouse-specific	chr9:67725113-67725140:-	TAGGATTCTCAGAATATGATCAAGGCT	chr17:66209364-66209404:-	AAGGATTCCCAGAAACTGATCTCACTACTACTGTGCTCAT	76	1	22	1
9-qC-31469.1	Murine-specific	17-qE1.1-7037.1	Mouse-specific	chr9:67725114-67725140:-	TAGGATTCTCAGAATATGATCAAGGA	chr17:66209364-66209404:-	AAGGATTCCCAGAAACTGATCTCACTACTACTGTGCTCAT	41	1	22	1
9-qC-31469.1	Murine-specific	17-qE1.1-7037.1	Mouse-specific	chr9:67725114-67725140:-	TAGGATTCTCAGAATATGATCAAGGC	chr17:66209364-66209404:-	AAGGATTCCCAGAAACTGATCTCACTACTACTGTGCTCAT	674	1	22	1
9-qC-31469.1	Murine-specific	17-qE1.1-7037.1	Mouse-specific	chr9:67725115-67725140:-	TAGGATTCTCAGAATATGATCAAGG	chr17:66209364-66209404:-	AAGGATTCCCAGAAACTGATCTCACTACTACTGTGCTCAT	295	1	22	1
17-qA3.3-26735.1	Eutherian	2-qE1-35981.1	Eutherian	chr17:27327784-27327808:+	TATCAGACAAGAGATAGGAGTGGG	chr2:92551855-92551895:-	AATCAGAAAAGAGAAAGTAGTGGCTTTCCCAGGAGGTTTT	45	1	23	1
17-qA3.3-26735.1	Eutherian	2-qE1-35981.1	Eutherian	chr17:27327784-27327809:+	TATCAGACAAGAGATAGGAGTGGGT	chr2:92551855-92551895:-	AATCAGAAAAGAGAAAGTAGTGGCTTTCCCAGGAGGTTTT	104	1	23	1
17-qA3.3-26735.1	Eutherian	2-qE1-35981.1	Eutherian	chr17:27327784-27327810:+	TATCAGACAAGAGATAGGAGTGGGTC	chr2:92551855-92551895:-	AATCAGAAAAGAGAAAGTAGTGGCTTTCCCAGGAGGTTTT	35	1	23	1
17-qA3.3-26735.1	Eutherian	2-qE1-35981.1	Eutherian	chr17:27327784-27327812:+	TATCAGACAAGAGATAGGAGTGGGTCTC	chr2:92551855-92551895:-	AATCAGAAAAGAGAAAGTAGTGGCTTTCCCAGGAGGTTTT	39	1	23	1
17-qA3.3-26735.1	Eutherian	2-qE1-35981.1	Eutherian	chr17:27327784-27327813:+	TATCAGACAAGAGATAGGAGTGGGTCTCT	chr2:92551855-92551895:-	AATCAGAAAAGAGAAAGTAGTGGCTTTCCCAGGAGGTTTT	279	1	23	1
9-qC-31469.1	Murine-specific	5-qF-14508.1	Eutherian	chr9:67702837-67702868:-	TCTGCAGTTAGGAGCACTGGCTGTTCTTTCT	chr5:113325088-113325128:+	TCTGCAGTTAAGAGCACTGGCTGCTCTTGCAGAGGAACCG	34	1	177	1
9-qC-31469.1	Murine-specific	5-qF-14508.1	Eutherian	chr9:67702838-67702868:-	TCTGCAGTTAGGAGCACTGGCTGTTCTTTC	chr5:113325088-113325128:+	TCTGCAGTTAAGAGCACTGGCTGCTCTTGCAGAGGAACCG	87	1	177	1
13-qA3.1-213.1	Mouse-specific	5-qG2-950.1	Murine-specific	chr13:21504956-21504987:-	AGAATTCACACTGGAGAAAAACGCTATGAGT	chr5:136936829-136936869:-	AGAATTCACACTGGAGAAAAGCCCTATGCTCGGGAAGGTA	125	1	105	1
13-qA3.1-213.1	Mouse-specific	5-qG2-950.1	Murine-specific	chr13:21504957-21504987:-	AGAATTCACACTGGAGAAAAACGCTATGAG	chr5:136936829-136936869:-	AGAATTCACACTGGAGAAAAGCCCTATGCTCGGGAAGGTA	77	1	105	1
13-qA3.1-213.1	Mouse-specific	5-qG2-950.1	Murine-specific	chr13:21504958-21504987:-	AGAATTCACACTGGAGAAAAACGCTATGA	chr5:136936829-136936869:-	AGAATTCACACTGGAGAAAAGCCCTATGCTCGGGAAGGTA	145	1	105	1
13-qA3.1-213.1	Mouse-specific	5-qG2-950.1	Murine-specific	chr13:21504959-21504987:-	AGAATTCACACTGGAGAAAAACGCTATG	chr5:136936829-136936869:-	AGAATTCACACTGGAGAAAAGCCCTATGCTCGGGAAGGTA	36	1	105	1
13-qA3.1-213.1	Mouse-specific	5-qG2-950.1	Murine-specific	chr13:21504960-21504987:-	AGAATTCACACTGGAGAAAAACGCTAT	chr5:136936829-136936869:-	AGAATTCACACTGGAGAAAAGCCCTATGCTCGGGAAGGTA	47	1	105	1
13-qA3.1-213.1	Mouse-specific	5-qG2-950.1	Murine-specific	chr13:21504961-21504987:-	AGAATTCACACTGGAGAAAAACGCTA	chr5:136936829-136936869:-	AGAATTCACACTGGAGAAAAGCCCTATGCTCGGGAAGGTA	478	1	105	1
4-qB3-639.1	Mouse-specific	5-qF-14224.1	Eutherian	chr4:62224737-62224765:-	TGGAAAGCTGTGGTGCAGGCCTTGCAGG	chr5:113342101-113342141:-	AGGAAAGCTGAATTGCAGCCCTAACACAGCTGAAAACACT	174	2	14	1
4-qB3-639.1	Mouse-specific	5-qF-14224.1	Eutherian	chr4:62224739-62224765:-	TGGAAAGCTGTGGTGCAGGCCTTGCA	chr5:113342101-113342141:-	AGGAAAGCTGAATTGCAGCCCTAACACAGCTGAAAACACT	771	2	14	1
4-qB3-639.1	Mouse-specific	5-qF-14224.1	Eutherian	chr4:62224740-62224765:-	TGGAAAGCTGTGGTGCAGGCCTTGC	chr5:113342101-113342141:-	AGGAAAGCTGAATTGCAGCCCTAACACAGCTGAAAACACT	138	2	14	1
4-qB3-639.1	Mouse-specific	5-qF-14224.1	Eutherian	chr4:62224740-62224765:-	TGGAAAGCTGTGGTGCAGGCCTTGT	chr5:113342101-113342141:-	AGGAAAGCTGAATTGCAGCCCTAACACAGCTGAAAACACT	94	2	14	1
4-qB3-639.1	Mouse-specific	5-qF-14224.1	Eutherian	chr4:62224741-62224765:-	TGGAAAGCTGTGGTGCAGGCCTTG	chr5:113342101-113342141:-	AGGAAAGCTGAATTGCAGCCCTAACACAGCTGAAAACACT	205	2	14	1
4-qB3-277.1	Murine-specific	5-qF-14224.1	Eutherian	chr4:62234765-62234789:+	TGGAAAGCTGTGGTGCAGGCCTTG	chr5:113342101-113342141:-	AGGAAAGCTGAATTGCAGCCCTAACACAGCTGAAAACACT	205	2	14	1
4-qB3-277.1	Murine-specific	5-qF-14224.1	Eutherian	chr4:62234765-62234790:+	TGGAAAGCTGTGGTGCAGGCCTTGC	chr5:113342101-113342141:-	AGGAAAGCTGAATTGCAGCCCTAACACAGCTGAAAACACT	138	2	14	1
4-qB3-277.1	Murine-specific	5-qF-14224.1	Eutherian	chr4:62234765-62234790:+	TGGAAAGCTGTGGTGCAGGCCTTGT	chr5:113342101-113342141:-	AGGAAAGCTGAATTGCAGCCCTAACACAGCTGAAAACACT	94	2	14	1
4-qB3-277.1	Murine-specific	5-qF-14224.1	Eutherian	chr4:62234765-62234791:+	TGGAAAGCTGTGGTGCAGGCCTTGCA	chr5:113342101-113342141:-	AGGAAAGCTGAATTGCAGCCCTAACACAGCTGAAAACACT	771	2	14	1
4-qB3-277.1	Murine-specific	5-qF-14224.1	Eutherian	chr4:62234765-62234793:+	TGGAAAGCTGTGGTGCAGGCCTTGCAGG	chr5:113342101-113342141:-	AGGAAAGCTGAATTGCAGCCCTAACACAGCTGAAAACACT	174	2	14	1
17-qE1.1-7037.1	Mouse-specific	5-qG3-23659.1	Eutherian	chr17:66213640-66213671:+	TTTGTTTGTTTGTTTGATTTGACCTGTCACC	chr5:149805406-149805446:+	TTTGTTTGTTTGTTTGTTTTTTCCTTTCTGAGGGTTAATT	71	1	55	1
14-qA3-2286.1	Mouse-specific	7-qD2-11976.1	Eutherian	chr14:24362254-24362285:-	TCAACTAACCTGGACCCGTGGGGCTCTCAGA	chr7:73820421-73820461:-	TCAACTAACCTGGGCCCTCAGGGGCTCCCAGAGACTGACC	104	2	34	1
14-qA3-2286.1	Mouse-specific	7-qD2-11976.1	Eutherian	chr14:24362255-24362285:-	TCAACTAACCTGGACCCGTGGGGCTCTCAG	chr7:73820421-73820461:-	TCAACTAACCTGGGCCCTCAGGGGCTCCCAGAGACTGACC	109	2	34	1
14-qA3-2286.1	Mouse-specific	7-qD2-11976.1	Eutherian	chr14:24362256-24362285:-	TCAACTAACCTGGACCCGTGGGGCTCTCA	chr7:73820421-73820461:-	TCAACTAACCTGGGCCCTCAGGGGCTCCCAGAGACTGACC	315	3	34	1
14-qA3-2286.1	Mouse-specific	7-qD2-11976.1	Eutherian	chr14:24362258-24362285:-	TCAACTAACCTGGACCCGTGGGGCTCT	chr7:73820421-73820461:-	TCAACTAACCTGGGCCCTCAGGGGCTCCCAGAGACTGACC	119	3	34	1
14-qA3-2286.1	Mouse-specific	7-qD2-11976.1	Eutherian	chr14:24362259-24362285:-	TCAACTAACCTGGACCCGTGGGGCTC	chr7:73820421-73820461:-	TCAACTAACCTGGGCCCTCAGGGGCTCCCAGAGACTGACC	161	3	34	1
9-qA5.3-24188.1	Eutherian	7-qD2-11976.1	Eutherian	chr9:54236008-54236038:-	TCAACTAACCTGGGCCCACGGGGGTTCATA	chr7:73820421-73820461:-	TCAACTAACCTGGGCCCTCAGGGGCTCCCAGAGACTGACC	55	1	34	1
15-qE1-8387.1	Eutherian	10-qB4-6488.1	Murine-specific	chr15:78665781-78665810:-	ATATGTCTGTGCACCACGTGCGTGCCTGT	chr10:62679016-62679056:-	GTATGTCTGTGTACCACTTGCATGCCTGGTGCCCTCAAAA	42	1	17	1
18-qE1-36451.1	Eutherian	15-qD1-17920.1	Eutherian	chr18:67041052-67041081:-	TTGTTTAGATCCTACAAGGGTGTTCTGCT	chr15:59273008-59273048:+	GTGTTTAGAGCCTACAAAAGATTGCTGTATTAGTGGTACA	42	1	21	1
2-qE1-35981.1	Eutherian	19-qC2-1361.1	Murine-specific	chr2:92545565-92545594:+	CCTGTCTTCATGGTTACAGAATCCAGTCT	chr19:37260020-37260060:+	CCTGTCTTCAAGGTTACAGTCCAGACTTCTTAATGGGCCA	141	1	67	1
9-qA5.3-24188.1	Eutherian	12-qE-7089.1	Eutherian	chr9:54232742-54232772:-	TGGACTGAAACAGAAGACATTTTTAATGAT	chr12:98439556-98439596:-	AGGACTGAAAGAGAAAACACTTCTGAGTGCGAGAGTGGCC	33	1	13	1
6-qF3-28913.1	Murine-specific	17-qA3.3-27363.1	Eutherian	chr6:127801496-127801520:+	ATGCTTTGTACCCTGTGACACCAC	chr17:27314253-27314293:+	ATGCTTTGTACTATGTGACTCAACTAAGAGGCCACAGAGA	269	1	72	1
6-qF3-28913.1	Murine-specific	17-qA3.3-27363.1	Eutherian	chr6:127801496-127801520:+	ATGCTTTGTACCCTGTGACACCAA	chr17:27314253-27314293:+	ATGCTTTGTACTATGTGACTCAACTAAGAGGCCACAGAGA	38	1	72	1
6-qF3-28913.1	Murine-specific	17-qA3.3-27363.1	Eutherian	chr6:127801496-127801521:+	ATGCTTTGTACCCTGTGACACCACC	chr17:27314253-27314293:+	ATGCTTTGTACTATGTGACTCAACTAAGAGGCCACAGAGA	1227	1	72	1
6-qF3-28913.1	Murine-specific	17-qA3.3-27363.1	Eutherian	chr6:127801496-127801521:+	ATGCTTTGTACCCTGTGACACCACA	chr17:27314253-27314293:+	ATGCTTTGTACTATGTGACTCAACTAAGAGGCCACAGAGA	51	1	72	1
6-qF3-28913.1	Murine-specific	17-qA3.3-27363.1	Eutherian	chr6:127801496-127801521:+	ATGCTTTGTACCCTGTGACACCACT	chr17:27314253-27314293:+	ATGCTTTGTACTATGTGACTCAACTAAGAGGCCACAGAGA	78	1	72	1
6-qF3-28913.1	Murine-specific	17-qA3.3-27363.1	Eutherian	chr6:127801496-127801522:+	ATGCTTTGTACCCTGTGACACCACCT	chr17:27314253-27314293:+	ATGCTTTGTACTATGTGACTCAACTAAGAGGCCACAGAGA	171	1	72	1
6-qF3-28913.1	Murine-specific	17-qA3.3-27363.1	Eutherian	chr6:127801496-127801522:+	ATGCTTTGTACCCTGTGACACCACCA	chr17:27314253-27314293:+	ATGCTTTGTACTATGTGACTCAACTAAGAGGCCACAGAGA	629	1	72	1
6-qF3-28913.1	Murine-specific	17-qA3.3-27363.1	Eutherian	chr6:127801496-127801523:+	ATGCTTTGTACCCTGTGACACCACCAC	chr17:27314253-27314293:+	ATGCTTTGTACTATGTGACTCAACTAAGAGGCCACAGAGA	486	1	72	1
6-qF3-28913.1	Murine-specific	17-qA3.3-27363.1	Eutherian	chr6:127801496-127801523:+	ATGCTTTGTACCCTGTGACACCACCAT	chr17:27314253-27314293:+	ATGCTTTGTACTATGTGACTCAACTAAGAGGCCACAGAGA	67	1	72	1
6-qF3-28913.1	Murine-specific	17-qA3.3-27363.1	Eutherian	chr6:127801496-127801524:+	ATGCTTTGTACCCTGTGACACCACCACT	chr17:27314253-27314293:+	ATGCTTTGTACTATGTGACTCAACTAAGAGGCCACAGAGA	332	1	72	1
6-qF3-28913.1	Murine-specific	17-qA3.3-27363.1	Eutherian	chr6:127801496-127801524:+	ATGCTTTGTACCCTGTGACACCACCACC	chr17:27314253-27314293:+	ATGCTTTGTACTATGTGACTCAACTAAGAGGCCACAGAGA	3887	1	72	1
6-qF3-28913.1	Murine-specific	17-qA3.3-27363.1	Eutherian	chr6:127801496-127801525:+	ATGCTTTGTACCCTGTGACACCACCACTT	chr17:27314253-27314293:+	ATGCTTTGTACTATGTGACTCAACTAAGAGGCCACAGAGA	38	1	72	1
6-qF3-28913.1	Murine-specific	17-qA3.3-27363.1	Eutherian	chr6:127801496-127801525:+	ATGCTTTGTACCCTGTGACACCACCACCT	chr17:27314253-27314293:+	ATGCTTTGTACTATGTGACTCAACTAAGAGGCCACAGAGA	7671	1	72	1
6-qF3-28913.1	Murine-specific	17-qA3.3-27363.1	Eutherian	chr6:127801496-127801526:+	ATGCTTTGTACCCTGTGACACCACCACCTT	chr17:27314253-27314293:+	ATGCTTTGTACTATGTGACTCAACTAAGAGGCCACAGAGA	1157	1	72	1
6-qF3-28913.1	Murine-specific	17-qA3.3-27363.1	Eutherian	chr6:127801496-127801527:+	ATGCTTTGTACCCTGTGACACCACCACCTTT	chr17:27314253-27314293:+	ATGCTTTGTACTATGTGACTCAACTAAGAGGCCACAGAGA	144	1	72	1
15-qE1-8387.1	Eutherian	12-qE-7089.1	Eutherian	chr15:78662694-78662724:-	TACTATGCTATGCAGTCACCTTGGGGCTAG	chr12:98447171-98447211:-	CACTATGCTATACAGACACCTAGAATAGGTGTGCTTTCAA	55	1	81	1
15-qE1-8387.1	Eutherian	12-qE-7089.1	Eutherian	chr15:78662695-78662724:-	TACTATGCTATGCAGTCACCTTGGGGCTA	chr12:98447171-98447211:-	CACTATGCTATACAGACACCTAGAATAGGTGTGCTTTCAA	93	1	81	1
15-qE1-8387.1	Eutherian	12-qE-7089.1	Eutherian	chr15:78662696-78662724:-	TACTATGCTATGCAGTCACCTTGGGGCT	chr12:98447171-98447211:-	CACTATGCTATACAGACACCTAGAATAGGTGTGCTTTCAA	120	1	81	1
15-qE1-8387.1	Eutherian	12-qE-7089.1	Eutherian	chr15:78662697-78662724:-	TACTATGCTATGCAGTCACCTTGGGGC	chr12:98447171-98447211:-	CACTATGCTATACAGACACCTAGAATAGGTGTGCTTTCAA	345	1	81	1
15-qE1-8387.1	Eutherian	12-qE-7089.1	Eutherian	chr15:78662700-78662724:-	TACTATGCTATGCAGTCACCTTGG	chr12:98447171-98447211:-	CACTATGCTATACAGACACCTAGAATAGGTGTGCTTTCAA	41	1	81	1
10-qB4-6488.1	Murine-specific	14-qA3-19970.1	Murine-specific	chr10:62676286-62676316:+	TTTAATCCCAGTTCTCGGGAGTTTGAGAGC	chr14:24120753-24120793:-	TTTAATCCCAGCACTCGGGAGGCAGAGGCAGGTGGATTTC	40	1	22	1
10-qB4-6488.1	Murine-specific	14-qA3-19970.1	Murine-specific	chr10:62688647-62688673:+	TTTAATCTTAGCACTGGGGAGACTGA	chr14:24120753-24120793:-	TTTAATCCCAGCACTCGGGAGGCAGAGGCAGGTGGATTTC	42	1	22	1
10-qB4-6488.1	Murine-specific	14-qA3-19970.1	Murine-specific	chr10:62688647-62688675:+	TTTAATCTTAGCACTGGGGAGACTGAGT	chr14:24120753-24120793:-	TTTAATCCCAGCACTCGGGAGGCAGAGGCAGGTGGATTTC	47	1	22	1
10-qB4-6488.1	Murine-specific	14-qA3-19970.1	Murine-specific	chr10:62688647-62688675:+	TTTAATCTTAGCACTGGGGAGACTGAGA	chr14:24120753-24120793:-	TTTAATCCCAGCACTCGGGAGGCAGAGGCAGGTGGATTTC	75	1	22	1
10-qB4-6488.1	Murine-specific	14-qA3-19970.1	Murine-specific	chr10:62688647-62688676:+	TTTAATCTTAGCACTGGGGAGACTGAGAT	chr14:24120753-24120793:-	TTTAATCCCAGCACTCGGGAGGCAGAGGCAGGTGGATTTC	181	1	22	1
11-qE1-9443.1	Murine-specific	14-qA3-19970.1	Murine-specific	chr11:103447005-103447031:+	TTTAATCCCAGGACCCGGAAAGCAAA	chr14:24120753-24120793:-	TTTAATCCCAGCACTCGGGAGGCAGAGGCAGGTGGATTTC	55	1	22	1
11-qE1-9443.1	Murine-specific	14-qA3-19970.1	Murine-specific	chr11:103447005-103447032:+	TTTAATCCCAGGACCCGGAAAGCAAAG	chr14:24120753-24120793:-	TTTAATCCCAGCACTCGGGAGGCAGAGGCAGGTGGATTTC	72	1	22	1
11-qE1-9443.1	Murine-specific	14-qA3-19970.1	Murine-specific	chr11:103447005-103447033:+	TTTAATCCCAGGACCCGGAAAGCAAAGG	chr14:24120753-24120793:-	TTTAATCCCAGCACTCGGGAGGCAGAGGCAGGTGGATTTC	61	1	22	1
11-qE1-9443.1	Murine-specific	14-qA3-19970.1	Murine-specific	chr11:103447005-103447033:+	TTTAATCCCAGGACCCGGAAAGCAAAGT	chr14:24120753-24120793:-	TTTAATCCCAGCACTCGGGAGGCAGAGGCAGGTGGATTTC	63	1	22	1
11-qE1-9443.1	Murine-specific	14-qA3-19970.1	Murine-specific	chr11:103447005-103447034:+	TTTAATCCCAGGACCCGGAAAGCAAAGGC	chr14:24120753-24120793:-	TTTAATCCCAGCACTCGGGAGGCAGAGGCAGGTGGATTTC	348	1	22	1
11-qE1-9443.1	Murine-specific	14-qA3-19970.1	Murine-specific	chr11:103447005-103447035:+	TTTAATCCCAGGACCCGGAAAGCAAAGGCA	chr14:24120753-24120793:-	TTTAATCCCAGCACTCGGGAGGCAGAGGCAGGTGGATTTC	192	1	22	1
[truncated: 2,572 more rows]
