# Supplementary material for: A-MYB/TCFL5 regulatory architecture ensures the production of pachytene piRNAs in placental mammals
Source: RNA. 2023 Jan;29(1):30–43. doi: 10.1261/rna.079472.122 (PMC9808571; doi:10.1261/rna.079472.122)
Supplement: Supplemental Material [file supp_079472.122_Supplemental_Table_S3.xlsx]

## Sheet: Table S3
Table S3. Genes bound by TCFL5 in rhesus macaque.
Gene	Distance, TSS to summit of nearest TCFL5 peak (bp)	Type
SAMD11	13256	Protein-coding
NOC2L	1350	Protein-coding
KLHL17	622	Protein-coding
PLEKHN1	4637	Protein-coding
PERM1	13547	Protein-coding
ENSMMUG00000008350	11424	Protein-coding
HES4	1740	Protein-coding
ISG15	3341	Protein-coding
AGRN	632	Protein-coding
RNF223	1499	Protein-coding
C1orf159	8667	Protein-coding
TTLL10	26107	Protein-coding
TNFRSF18	14611	Protein-coding
SDF4	851	Protein-coding
B3GALT6	86	Protein-coding
FAM132A	9419	Protein-coding
UBE2J2	0	Protein-coding
SCNN1D	8742	Protein-coding
ACAP3	12946	Protein-coding
PUSL1	0	Protein-coding
CPSF3L	378	Protein-coding
CPTP	3	Protein-coding
DVL1	10219	Protein-coding
MXRA8	1880	Protein-coding
CCNL2	10423	Protein-coding
TMEM88B	4768	Protein-coding
ENSMMUG00000013280	0	Protein-coding
ENSMMUG00000045301	6574	Protein-coding
ENSMMUG00000001549	0	Protein-coding
TMEM240	23215	Protein-coding
SSU72	29351	Protein-coding
FNDC10	0	Protein-coding
MIB2	88	Protein-coding
MMP23B	103	Protein-coding
ENSMMUG00000001894	3716	Protein-coding
SLC35E2B	570	Protein-coding
NADK	5444	Protein-coding
GNB1	39568	Protein-coding
CALML6	4441	Protein-coding
TMEM52	1700	Protein-coding
CFAP74	2281	Protein-coding
GABRD	4966	Protein-coding
PRKCZ	407	Protein-coding
ENSMMUG00000018916	9660	Protein-coding
SKI	24882	Protein-coding
MORN1	39527	Protein-coding
RER1	7362	Protein-coding
PEX10	7388	Protein-coding
PLCH2	59552	Protein-coding
PANK4	25923	Protein-coding
HES5	1299	Protein-coding
TNFRSF14	34561	Protein-coding
FAM213B	0	Protein-coding
MMEL1	4005	Protein-coding
TTC34	25880	Protein-coding
ACTRT2	42554	Protein-coding
ENSMMUG00000038565	1037	Protein-coding
PRDM16	168762	Protein-coding
ARHGEF16	168872	Protein-coding
MEGF6	131545	Protein-coding
ENSMMUG00000047456	819	Protein-coding
TPRG1L	42	Protein-coding
WDR8	1797	Protein-coding
TP73	371	Protein-coding
CCDC27	4697	Protein-coding
ENSMMUG00000038836	21203	Protein-coding
LRRC47	13133	Protein-coding
CEP104	12393	Protein-coding
DFFB	0	Protein-coding
C1orf174	12606	Protein-coding
ENSMMUG00000045226	346883	Protein-coding
NPHP4	135291	Protein-coding
KCNAB2	46293	Protein-coding
CHD5	48393	Protein-coding
RPL22	19393	Protein-coding
RNF207	0	Protein-coding
ICMT	12828	Protein-coding
HES3	961	Protein-coding
ACOT7	3478	Protein-coding
HES2	5839	Protein-coding
ESPN	3991	Protein-coding
TNFRSF25	6741	Protein-coding
PLEKHG5	11800	Protein-coding
NOL9	29033	Protein-coding
TAS1R1	628	Protein-coding
ZBTB48	21256	Protein-coding
ENSMMUG00000042613	12182	Protein-coding
KLHL21	8678	Protein-coding
PHF13	185	Protein-coding
THAP3	64	Protein-coding
DNAJC11	7731	Protein-coding
ENSMMUG00000043877	4047	Protein-coding
ENSMMUG00000038740	167440	Protein-coding
VAMP3	12869	Protein-coding
PER3	158	Protein-coding
UTS2	38890	Protein-coding
TNFRSF9	32241	Protein-coding
ENSMMUG00000038181	0	Protein-coding
ERRFI1	19989	Protein-coding
ENSMMUG00000038448	276220	Protein-coding
SLC45A1	319695	Protein-coding
RERE	349632	Protein-coding
CA6	66208	Protein-coding
SLC2A7	68203	Protein-coding
SLC2A5	35666	Protein-coding
H6PD	4512	Protein-coding
SPSB1	72610	Protein-coding
SLC25A33	724	Protein-coding
PIK3CD	29127	Protein-coding
CTNNBIP1	42667	Protein-coding
ENSMMUG00000043172	134348	Protein-coding
ENSMMUG00000048150	116787	Protein-coding
LZIC	36018	Protein-coding
NMNAT1	26699	Protein-coding
RBP7	0	Protein-coding
UBE4B	0	Protein-coding
ENSMMUG00000040221	186	Protein-coding
pi_rheMac8_PC_ENSMMUG00000040221	186	Protein-coding piRNA cluster
KIF1B	22427	Protein-coding
pi_rheMac8_PC_KIF1B	22427	Protein-coding piRNA cluster
ENSMMUG00000030440	87198	Protein-coding
PGD	0	Protein-coding
CORT	0	Protein-coding
DFFA	14382	Protein-coding
PEX14	0	Protein-coding
ENSMMUG00000039408	18475	Protein-coding
C1orf127	65825	Protein-coding
ENSMMUG00000007456	39	Protein-coding
MASP2	15291	Protein-coding
SRM	43548	Protein-coding
EXOSC10	29719	Protein-coding
MTOR	3956	Protein-coding
ANGPTL7	72750	Protein-coding
UBIAD1	0	Protein-coding
ENSMMUG00000049196	32606	Protein-coding
FBXO2	5502	Protein-coding
FBXO44	115	Protein-coding
FBXO6	4830	Protein-coding
MAD2L2	5000	Protein-coding
AGTRAP	0	Protein-coding
C1orf167	144	Protein-coding
MTHFR	16165	Protein-coding
CLCN6	0	Protein-coding
NPPA	14878	Protein-coding
NPPB	1460	Protein-coding
KIAA2013	13320	Protein-coding
PLOD1	26087	Protein-coding
MFN2	1068	Protein-coding
ENSMMUG00000040081	3585	Protein-coding
MIIP	72	Protein-coding
TNFRSF8	0	Protein-coding
TNFRSF1B	234	Protein-coding
VPS13D	61314	Protein-coding
DHRS3	58570	Protein-coding
AADACL4	30811	Protein-coding
AADACL3	90939	Protein-coding
C1orf158	66410	Protein-coding
ENSMMUG00000040722	11987	Protein-coding
ENSMMUG00000046109	146	Protein-coding
ENSMMUG00000045175	8165	Protein-coding
ENSMMUG00000041024	56139	Protein-coding
PDPN	119855	Protein-coding
PRDM2	274	Protein-coding
KAZN	139	Protein-coding
ENSMMUG00000043916	15941	Protein-coding
TMEM51	32487	Protein-coding
FHAD1	38	Protein-coding
CTRC	110638	Protein-coding
CASP9	33916	Protein-coding
DNAJC16	0	Protein-coding
AGMAT	12856	Protein-coding
ENSMMUG00000019912	216	Protein-coding
PLEKHM2	69157	Protein-coding
SLC25A34	119954	Protein-coding
FBLIM1	108701	Protein-coding
SPEN	571	Protein-coding
ZBTB17	34800	Protein-coding
C1orf64	29862	Protein-coding
HSPB7	42531	Protein-coding
CLCNKA	49816	Protein-coding
FAM131C	62609	Protein-coding
EPHA2	30919	Protein-coding
ARHGEF19	8054	Protein-coding
ENSMMUG00000041004	10115	Protein-coding
FBXO42	12288	Protein-coding
C1orf144	0	Protein-coding
SPATA21	35799	Protein-coding
NECAP2	31050	Protein-coding
ENSMMUG00000038806	10191	Protein-coding
ENSMMUG00000040574	12502	Protein-coding
ENSMMUG00000038839	2047	Protein-coding
CROCC	32011	Protein-coding
MFAP2	15544	Protein-coding
ATP13A2	27533	Protein-coding
SDHB	33917	Protein-coding
PADI2	14113	Protein-coding
PADI4	115673	Protein-coding
PADI6	50281	Protein-coding
RCC2	15547	Protein-coding
ARHGEF10L	154341	Protein-coding
ACTL8	5901	Protein-coding
ENSMMUG00000009685	6457	Protein-coding
IGSF21	290114	Protein-coding
ENSMMUG00000044952	307401	Protein-coding
PAX7	71493	Protein-coding
TAS1R2	67151	Protein-coding
ALDH4A1	32369	Protein-coding
ENSMMUG00000004754	5479	Protein-coding
UBR4	74428	Protein-coding
EMC1	8776	Protein-coding
MRTO4	0	Protein-coding
AKR7A3	6874	Protein-coding
ENSMMUG00000006697	20231	Protein-coding
PQLC2	21279	Protein-coding
CAPZB	54351	Protein-coding
ENSMMUG00000032273	93437	Protein-coding
ENSMMUG00000005855	0	Protein-coding
ENSMMUG00000003234	14377	Protein-coding
ENSMMUG00000032231	23170	Protein-coding
HTR6	934	Protein-coding
TMCO4	12304	Protein-coding
ENSMMUG00000010764	0	Protein-coding
PLA2G2A	111708	Protein-coding
PLA2G2D	74904	Protein-coding
PLA2G2F	47848	Protein-coding
PLA2G2C	22893	Protein-coding
UBXN10	0	Protein-coding
VWA5B1	31924	Protein-coding
MUL1	133063	Protein-coding
CDA	73735	Protein-coding
PINK1	26908	Protein-coding
DDOST	8921	Protein-coding
KIF17	2521	Protein-coding
SH2D5	1378	Protein-coding
HP1BP3	9434	Protein-coding
EIF4G3	19439	Protein-coding
ENSMMUG00000041719	31633	Protein-coding
ECE1	44386	Protein-coding
ENSMMUG00000043695	42206	Protein-coding
ALPL	0	Protein-coding
RAP1GAP	26693	Protein-coding
USP48	19068	Protein-coding
LDLRAD2	37845	Protein-coding
HSPG2	48082	Protein-coding
ENSMMUG00000020035	56613	Protein-coding
ENSMMUG00000003887	17952	Protein-coding
CDC42	0	Protein-coding
ENSMMUG00000042519	77395	Protein-coding
ENSMMUG00000046184	158376	Protein-coding
ZBTB40	0	Protein-coding
EPHA8	305	Protein-coding
C1QC	81756	Protein-coding
C1QB	91626	Protein-coding
EPHB2	147500	Protein-coding
LACTBL1	0	Protein-coding
C1orf234	7605	Protein-coding
KDM1A	0	Protein-coding
LUZP1	67425	Protein-coding
HTR1D	25680	Protein-coding
HNRNPR	34961	Protein-coding
ZNF436	8393	Protein-coding
TCEA3	11773	Protein-coding
ASAP3	53656	Protein-coding
E2F2	22355	Protein-coding
ID3	7257	Protein-coding
MDS2	11882	Protein-coding
RPL11	63595	Protein-coding
TCEB3	32977	Protein-coding
PITHD1	104	Protein-coding
LYPLA2	9406	Protein-coding
GALE	4933	Protein-coding
HMGCL	0	Protein-coding
FUCA1	17595	Protein-coding
CNR2	47369	Protein-coding
ENSMMUG00000038340	59307	Protein-coding
PNRC2	17	Protein-coding
ENSMMUG00000047959	7544	Protein-coding
ENSMMUG00000038562	8114	Protein-coding
MYOM3	94435	Protein-coding
IFNLR1	2556	Protein-coding
ENSMMUG00000037652	80277	Protein-coding
pi_rheMac8_IG_1	97281	Non-coding piRNA cluster
ENSMMUG00000043880	140591	Protein-coding
GRHL3	166278	Protein-coding
STPG1	142127	Protein-coding
NIPAL3	84522	Protein-coding
RCAN3	105	Protein-coding
ENSMMUG00000006645	0	Protein-coding
CLIC4	0	Protein-coding
RUNX3	30941	Protein-coding
SYF2	9743	Protein-coding
C1orf63	4317	Protein-coding
TMEM50A	334	Protein-coding
ENSMMUG00000011156	22855	Protein-coding
TMEM57	461	Protein-coding
MAN1C1	897	Protein-coding
SEPN1	20327	Protein-coding
MTFR1L	0	Protein-coding
AUNIP	13630	Protein-coding
PAQR7	2034	Protein-coding
STMN1	9084	Protein-coding
RPL39	12357	Protein-coding
PAFAH2	39780	Protein-coding
ENSMMUG00000039842	5696	Protein-coding
SLC30A2	938	Protein-coding
TRIM63	5662	Protein-coding
ENSMMUG00000019986	9088	Protein-coding
PDIK1L	0	Protein-coding
FAM110D	11243	Protein-coding
ENSMMUG00000039194	6130	Protein-coding
ENSMMUG00000004682	0	Protein-coding
ENSMMUG00000040742	1122	Protein-coding
CNKSR1	7514	Protein-coding
CATSPER4	21082	Protein-coding
CEP85	5377	Protein-coding
SH3BGRL3	0	Protein-coding
UBXN11	2051	Protein-coding
CD52	11309	Protein-coding
AIM1L	15272	Protein-coding
ZNF683	57658	Protein-coding
LIN28A	21361	Protein-coding
DHDDS	0	Protein-coding
HMGN2	0	Protein-coding
ENSMMUG00000040714	10939	Protein-coding
RPS6KA1	182	Protein-coding
ARID1A	267	Protein-coding
PIGV	1843	Protein-coding
ZDHHC18	34442	Protein-coding
SFN	1594	Protein-coding
GPN2	12507	Protein-coding
GPATCH3	550	Protein-coding
ENSMMUG00000010290	9752	Protein-coding
NR0B2	9999	Protein-coding
KDF1	14443	Protein-coding
TRNP1	0	Protein-coding
FAM46B	7713	Protein-coding
SLC9A1	59271	Protein-coding
WDTC1	484	Protein-coding
TMEM222	0	Protein-coding
SYTL1	7447	Protein-coding
MAP3K6	4705	Protein-coding
FCN3	559	Protein-coding
CD164L2	12156	Protein-coding
GPR3	0	Protein-coding
WASF2	16135	Protein-coding
AHDC1	34449	Protein-coding
FGR	35795	Protein-coding
IFI6	6529	Protein-coding
FAM76A	600	Protein-coding
ENSMMUG00000007655	14374	Protein-coding
PPP1R8	0	Protein-coding
ENSMMUG00000006934	20443	Protein-coding
THEMIS2	0	Protein-coding
RPA2	20379	Protein-coding
SMPDL3B	9186	Protein-coding
EYA3	42152	Protein-coding
ENSMMUG00000012931	121465	Protein-coding
PTAFR	88616	Protein-coding
DNAJC8	28456	Protein-coding
ATPIF1	699	Protein-coding
SESN2	0	Protein-coding
MED18	46008	Protein-coding
PHACTR4	37774	Protein-coding
ENSMMUG00000044241	72014	Protein-coding
ENSMMUG00000018338	14035	Protein-coding
TRNAU1AP	0	Protein-coding
ENSMMUG00000044110	12832	Protein-coding
RAB42	166	Protein-coding
TAF12	10051	Protein-coding
GMEB1	41730	Protein-coding
YTHDF2	0	Protein-coding
OPRD1	92772	Protein-coding
ENSMMUG00000022071	61764	Protein-coding
EPB41	68481	Protein-coding
TMEM200B	60243	Protein-coding
SRSF4	31807	Protein-coding
MECR	8708	Protein-coding
PTPRU	37	Protein-coding
LAPTM5	48793	Protein-coding
SDC3	43865	Protein-coding
PUM1	105733	Protein-coding
NKAIN1	25766	Protein-coding
SNRNP40	109362	Protein-coding
ENSMMUG00000046086	113102	Protein-coding
ZCCHC17	148828	Protein-coding
FABP3	112599	Protein-coding
SERINC2	67270	Protein-coding
ENSMMUG00000038744	47232	Protein-coding
TINAGL1	46364	Protein-coding
HCRTR1	678	Protein-coding
PEF1	11648	Protein-coding
COL16A1	7715	Protein-coding
ADGRB2	16846	Protein-coding
SPOCD1	717	Protein-coding
PTP4A2	30876	Protein-coding
KHDRBS1	0	Protein-coding
TMEM39B	643	Protein-coding
KPNA6	0	Protein-coding
pi_rheMac8_PC_KPNA6	0	Protein-coding piRNA cluster
TXLNA	0	Protein-coding
pi_rheMac8_PC_TXLNA	0	Protein-coding piRNA cluster
CCDC28B	3174	Protein-coding
IQCC	0	Protein-coding
DCDC2B	3015	Protein-coding
TMEM234	9168	Protein-coding
EIF3I	18718	Protein-coding
FAM167B	45113	Protein-coding
LCK	40888	Protein-coding
ENSMMUG00000046522	432	Protein-coding
ENSMMUG00000009948	7960	Protein-coding
MARCKSL1	1218	Protein-coding
ENSMMUG00000043810	0	Protein-coding
BSDC1	0	Protein-coding
ENSMMUG00000000352	0	Protein-coding
ZBTB8OS	55588	Protein-coding
RBBP4	0	Protein-coding
SYNC	29960	Protein-coding
KIAA1522	11861	Protein-coding
YARS	21243	Protein-coding
S100PBP	8	Protein-coding
HPCA	2037	Protein-coding
TMEM54	6608	Protein-coding
AK2	47148	Protein-coding
AZIN2	139	Protein-coding
TRIM62	34013	Protein-coding
ZNF362	34648	Protein-coding
A3GALT2	66	Protein-coding
PHC2	14279	Protein-coding
ZSCAN20	0	Protein-coding
CSMD2	58965	Protein-coding
HMGB4	310208	Protein-coding
C1orf94	0	Protein-coding
GJB5	8172	Protein-coding
GJB4	2119	Protein-coding
GJB3	19434	Protein-coding
GJA4	31345	Protein-coding
ENSMMUG00000012505	4940	Protein-coding
ENSMMUG00000043191	2643	Protein-coding
DLGAP3	1567	Protein-coding
ENSMMUG00000004999	97	Protein-coding
TMEM35B	3348	Protein-coding
ZMYM6	1685	Protein-coding
ZMYM1	58286	Protein-coding
ENSMMUG00000032194	46883	Protein-coding
SFPQ	15548	Protein-coding
ZMYM4	0	Protein-coding
ENSMMUG00000040430	107806	Protein-coding
KIAA0319L	126493	Protein-coding
ENSMMUG00000043924	38841	Protein-coding
NCDN	0	Protein-coding
TFAP2E	16393	Protein-coding
PSMB2	37768	Protein-coding
C1orf216	4548	Protein-coding
CLSPN	6318	Protein-coding
AGO4	6679	Protein-coding
AGO1	20791	Protein-coding
EIF2C3	51	Protein-coding
ENSMMUG00000012026	3606	Protein-coding
TEKT2	0	Protein-coding
ADPRHL2	0	Protein-coding
COL8A2	5925	Protein-coding
TRAPPC3	13831	Protein-coding
MAP7D1	16352	Protein-coding
THRAP3	37958	Protein-coding
SH3D21	910	Protein-coding
FAM176B	14320	Protein-coding
STK40	31355	Protein-coding
LSM10	3766	Protein-coding
OSCP1	15363	Protein-coding
ENSMMUG00000020433	4920	Protein-coding
CSF3R	1963	Protein-coding
GRIK3	231555	Protein-coding
ZC3H12A	243	Protein-coding
MEAF6	17385	Protein-coding
SNIP1	20088	Protein-coding
ENSMMUG00000044160	510	Protein-coding
DNALI1	0	Protein-coding
GNL2	10788	Protein-coding
RSPO1	13625	Protein-coding
C1orf109	8088	Protein-coding
CDCA8	0	Protein-coding
EPHA10	23539	Protein-coding
MANEAL	1256	Protein-coding
YRDC	8524	Protein-coding
pi_rheMac8_PC_MTF1	13252	Protein-coding piRNA cluster
C1orf122	13253	Protein-coding
MTF1	18252	Protein-coding
INPP5B	1569	Protein-coding
SF3A3	25979	Protein-coding
FHL3	7195	Protein-coding
UTP11L	0	Protein-coding
POU3F1	211	Protein-coding
ENSMMUG00000032490	148594	Protein-coding
ENSMMUG00000001895	146299	Protein-coding
RRAGC	23672	Protein-coding
ENSMMUG00000039765	3060	Protein-coding
GJA9	537	Protein-coding
RHBDL2	13382	Protein-coding
AKIRIN1	615	Protein-coding
ENSMMUG00000021561	0	Protein-coding
MACF1	2051	Protein-coding
ENSMMUG00000040634	29568	Protein-coding
ENSMMUG00000007493	82942	Protein-coding
ENSMMUG00000048572	48374	Protein-coding
PABPC4	17638	Protein-coding
HEYL	56932	Protein-coding
NT5C1A	28129	Protein-coding
ENSMMUG00000042903	12814	Protein-coding
HPCAL4	6159	Protein-coding
ENSMMUG00000045881	21080	Protein-coding
PPIE	0	Protein-coding
ENSMMUG00000018873	9845	Protein-coding
ENSMMUG00000032181	926	Protein-coding
TRIT1	38219	Protein-coding
MYCL	7021	Protein-coding
MFSD2A	72146	Protein-coding
ENSMMUG00000009188	0	Protein-coding
PPT1	29947	Protein-coding
RLF	0	Protein-coding
TMCO2	89862	Protein-coding
ZMPSTE24	102157	Protein-coding
COL9A2	57254	Protein-coding
SMAP2	312	Protein-coding
ZFP69B	5905	Protein-coding
ZFP69	30138	Protein-coding
EXO5	0	Protein-coding
ZNF684	565	Protein-coding
RIMS3	70358	Protein-coding
NFYC	16121	Protein-coding
KCNQ4	78888	Protein-coding
CITED4	0	Protein-coding
ENSMMUG00000043836	22652	Protein-coding
CTPS1	1322	Protein-coding
SLFNL1	34711	Protein-coding
SCMH1	46574	Protein-coding
FOXO6	4212	Protein-coding
EDN2	17487	Protein-coding
HIVEP3	9589	Protein-coding
GUCA2B	120007	Protein-coding
GUCA2A	129584	Protein-coding
FOXJ3	143503	Protein-coding
RIMKLA	48040	Protein-coding
ZMYND12	25385	Protein-coding
ENSMMUG00000013126	0	Protein-coding
CCDC30	432	Protein-coding
ENSMMUG00000037817	46449	Protein-coding
PPIH	453	Protein-coding
ENSMMUG00000013136	0	Protein-coding
P3H1	19887	Protein-coding
C1orf50	0	Protein-coding
SVBP	38514	Protein-coding
ENSMMUG00000039734	47604	Protein-coding
ERMAP	70603	Protein-coding
ZNF691	71788	Protein-coding
ENSMMUG00000045309	20173	Protein-coding
SLC2A1	0	Protein-coding
FAM183A	2777	Protein-coding
EBNA1BP2	9302	Protein-coding
CFAP57	414	Protein-coding
TMEM125	36364	Protein-coding
C1orf210	25978	Protein-coding
TIE1	4853	Protein-coding
MPL	26386	Protein-coding
CDC20	31044	Protein-coding
ELOVL1	26297	Protein-coding
MED8	7498	Protein-coding
SZT2	0	Protein-coding
HYI	3248	Protein-coding
PTPRF	35131	Protein-coding
KDM4A	2436	Protein-coding
ST3GAL3	31676	Protein-coding
ENSMMUG00000041879	87056	Protein-coding
ARTN	4629	Protein-coding
IPO13	0	Protein-coding
DPH2	4630	Protein-coding
ATP6V0B	0	Protein-coding
B4GALT2	0	Protein-coding
CCDC24	0	Protein-coding
SLC6A9	0	Protein-coding
ENSMMUG00000005986	141232	Protein-coding
KLF18	159633	Protein-coding
DMAP1	194877	Protein-coding
ENSMMUG00000047537	187585	Protein-coding
ERI3	187208	Protein-coding
RNF220	4055	Protein-coding
TMEM53	1566	Protein-coding
C1orf228	15828	Protein-coding
KIF2C	0	Protein-coding
ENSMMUG00000015270	0	Protein-coding
PLK3	0	Protein-coding
TCTEX1D4	0	Protein-coding
BTBD19	2058	Protein-coding
PTCH2	6909	Protein-coding
EIF2B3	7806	Protein-coding
ENSMMUG00000041709	4988	Protein-coding
HECTD3	9451	Protein-coding
UROD	5	Protein-coding
ZSWIM5	4100	Protein-coding
HPDL	0	Protein-coding
MUTYH	2369	Protein-coding
TOE1	422	Protein-coding
TESK2	0	Protein-coding
CCDC163	3848	Protein-coding
ENSMMUG00000006221	9111	Protein-coding
NASP	21	Protein-coding
ENSMMUG00000010773	10572	Protein-coding
ENSMMUG00000046735	7747	Protein-coding
CCDC17	2865	Protein-coding
GPBP1L1	2878	Protein-coding
IPP	23761	Protein-coding
ENSMMUG00000040638	929	Protein-coding
MAST2	73	Protein-coding
ENSMMUG00000046082	54105	Protein-coding
ENSMMUG00000044591	96073	Protein-coding
PIK3R3	92585	Protein-coding
ENSMMUG00000046826	28455	Protein-coding
ENSMMUG00000032153	23103	Protein-coding
TSPAN1	27778	Protein-coding
POMGNT1	14164	Protein-coding
LURAP1	0	Protein-coding
RAD54L	402	Protein-coding
LRRC41	21565	Protein-coding
NSUN4	117	Protein-coding
UQCRH	304	Protein-coding
ENSMMUG00000044579	645	Protein-coding
FAAH	40706	Protein-coding
DMBX1	15572	Protein-coding
ENSMMUG00000044816	32962	Protein-coding
KNCN	55444	Protein-coding
MKNK1	49191	Protein-coding
ENSMMUG00000032145	28827	Protein-coding
ENSMMUG00000004863	29833	Protein-coding
TEX38	3110	Protein-coding
CYP4B1	62120	Protein-coding
ENSMMUG00000019871	88223	Protein-coding
ENSMMUG00000032143	81297	Protein-coding
CYP4X1	27781	Protein-coding
ENSMMUG00000018862	82909	Protein-coding
ENSMMUG00000043348	134184	Protein-coding
STIL	63666	Protein-coding
ENSMMUG00000017375	352	Protein-coding
FOXD2	104016	Protein-coding
TRABD2B	55343	Protein-coding
ENSMMUG00000043219	388406	Protein-coding
SLC5A9	246505	Protein-coding
SPATA6	172924	Protein-coding
ENSMMUG00000043118	147811	Protein-coding
AGBL4	37356	Protein-coding
BEND5	244266	Protein-coding
ENSMMUG00000038040	239162	Protein-coding
ENSMMUG00000039991	182255	Protein-coding
ELAVL4	0	Protein-coding
ENSMMUG00000040728	81492	Protein-coding
ENSMMUG00000046813	20068	Protein-coding
FAF1	11823	Protein-coding
CDKN2C	87	Protein-coding
ENSMMUG00000038449	0	Protein-coding
ENSMMUG00000044018	23883	Protein-coding
C1orf185	112736	Protein-coding
RNF11	271711	Protein-coding
TTC39A	229503	Protein-coding
EPS15	160413	Protein-coding
OSBPL9	103695	Protein-coding
NRD1	66219	Protein-coding
RAB3B	41204	Protein-coding
ENSMMUG00000043685	829	Protein-coding
KTI12	480	Protein-coding
ENSMMUG00000042626	237	Protein-coding
BTF3L4	0	Protein-coding
ZFYVE9	21184	Protein-coding
ENSMMUG00000014503	29595	Protein-coding
CC2D1B	12885	Protein-coding
ZCCHC11	4866	Protein-coding
ENSMMUG00000014333	653	Protein-coding
GPX7	31946	Protein-coding
C1orf163	12511	Protein-coding
ZYG11B	60645	Protein-coding
ZYG11A	304	Protein-coding
ECHDC2	59485	Protein-coding
SCP2	112493	Protein-coding
ENSMMUG00000044313	25267	Protein-coding
PODN	16509	Protein-coding
SLC1A7	8450	Protein-coding
CPT2	24059	Protein-coding
C1orf123	8660	Protein-coding
ENSMMUG00000046219	5809	Protein-coding
MAGOH	6221	Protein-coding
LRP8	26519	Protein-coding
GLIS1	46297	Protein-coding
NDC1	25853	Protein-coding
ENSMMUG00000040794	2578	Protein-coding
DIO1	53587	Protein-coding
LRRC42	1288	Protein-coding
ENSMMUG00000031232	28557	Protein-coding
LDLRAD1	46420	Protein-coding
TMEM59	23352	Protein-coding
TCEANC2	0	Protein-coding
ENSMMUG00000040864	36822	Protein-coding
CDCP2	60830	Protein-coding
ENSMMUG00000015949	31762	Protein-coding
MRPL37	0	Protein-coding
SSBP3	27055	Protein-coding
ACOT11	57474	Protein-coding
FAM151A	101390	Protein-coding
ENSMMUG00000009114	75277	Protein-coding
TTC4	0	Protein-coding
PARS2	7693	Protein-coding
TTC22	5113	Protein-coding
LEXM	0	Protein-coding
DHCR24	35831	Protein-coding
TMEM61	53696	Protein-coding
BSND	35433	Protein-coding
PCSK9	644	Protein-coding
USP24	26265	Protein-coding
PLPP3	89796	Protein-coding
PRKAA2	10	Protein-coding
C1orf168	71179	Protein-coding
C8A	206040	Protein-coding
C8B	278190	Protein-coding
DAB1	325756	Protein-coding
OMA1	96090	Protein-coding
TACSTD2	877	Protein-coding
MYSM1	41829	Protein-coding
FGGY	18057	Protein-coding
DPH3	176321	Protein-coding
HOOK1	0	Protein-coding
ENSMMUG00000041232	16816	Protein-coding
CYP2J2	66828	Protein-coding
C1orf87	97649	Protein-coding
NFIA	189578	Protein-coding
ENSMMUG00000047252	270388	Protein-coding
TM2D1	502285	Protein-coding
PATJ	562987	Protein-coding
ENSMMUG00000032065	417859	Protein-coding
L1TD1	246621	Protein-coding
ENSMMUG00000010351	210288	Protein-coding
USP1	2206	Protein-coding
DOCK7	17543	Protein-coding
ANGPTL3	88249	Protein-coding
ATG4C	101573	Protein-coding
FOXD3	443	Protein-coding
ALG6	3018	Protein-coding
ITGB3BP	68933	Protein-coding
EFCAB7	0	Protein-coding
PGM1	0	Protein-coding
ROR1	526	Protein-coding
ENSMMUG00000005866	67622	Protein-coding
ENSMMUG00000044960	128834	Protein-coding
UBE2U	31	Protein-coding
CACHD1	35245	Protein-coding
RAVER2	247878	Protein-coding
JAK1	238203	Protein-coding
ENSMMUG00000043499	87761	Protein-coding
DNAJC6	75323	Protein-coding
LEPROT	400	Protein-coding
LEPR	10583	Protein-coding
PDE4B	138392	Protein-coding
SGIP1	379997	Protein-coding
WDR78	105879	Protein-coding
MIER1	0	Protein-coding
SLC35D1	56155	Protein-coding
C1orf141	29657	Protein-coding
ENSMMUG00000000648	120674	Protein-coding
IL12RB2	125855	Protein-coding
SERBP1	16909	Protein-coding
GADD45A	165	Protein-coding
ENSMMUG00000014807	16127	Protein-coding
DIRAS3	344414	Protein-coding
WLS	292214	Protein-coding
ENSMMUG00000038621	228327	Protein-coding
RPE65	36182	Protein-coding
DEPDC1	23484	Protein-coding
ENSMMUG00000007527	239102	Protein-coding
LRRC7	644830	Protein-coding
LRRC40	62533	Protein-coding
SRSF11	0	Protein-coding
ENSMMUG00000044712	166	Protein-coding
ANKRD13C	39714	Protein-coding
HHLA3	0	Protein-coding
ENSMMUG00000038810	41316	Protein-coding
CTH	217	Protein-coding
ENSMMUG00000008682	131678	Protein-coding
PTGER3	203264	Protein-coding
ENSMMUG00000017312	22011	Protein-coding
NEGR1	363749	Protein-coding
ENSMMUG00000042042	70977	Protein-coding
LRRIQ3	171485	Protein-coding
ENSMMUG00000019488	0	Protein-coding
LRRC53	273598	Protein-coding
ERICH3	168929	Protein-coding
TYW3	37	Protein-coding
LHX8	1907	Protein-coding
SLC44A5	61972	Protein-coding
ACADM	74529	Protein-coding
RABGGTB	11074	Protein-coding
MSH4	6060	Protein-coding
ENSMMUG00000018695	132753	Protein-coding
ST6GALNAC3	312127	Protein-coding
ST6GALNAC5	821253	Protein-coding
ENSMMUG00000047939	781953	Protein-coding
ENSMMUG00000046435	695868	Protein-coding
PIGK	596679	Protein-coding
AK5	422561	Protein-coding
NAP1L1	253346	Protein-coding
ENSMMUG00000042828	120622	Protein-coding
USP33	12051	Protein-coding
MIGA1	13195	Protein-coding
ENSMMUG00000041476	71381	Protein-coding
NEXN	92855	Protein-coding
FUBP1	39165	Protein-coding
DNAJB4	0	Protein-coding
GIPC2	728	Protein-coding
PTGFR	432705	Protein-coding
IFI44L	566911	Protein-coding
ENSMMUG00000044091	584034	Protein-coding
IFI44	589851	Protein-coding
ADGRL4	871263	Protein-coding
ENSMMUG00000018263	1041626	Protein-coding
ENSMMUG00000039921	1046000	Protein-coding
ENSMMUG00000006184	962128	Protein-coding
ENSMMUG00000048580	483684	Protein-coding
ENSMMUG00000042363	297939	Protein-coding
ADGRL2	34555	Protein-coding
ENSMMUG00000041521	77649	Protein-coding
ENSMMUG00000009554	778383	Protein-coding
ENSMMUG00000048987	4102	Protein-coding
ENSMMUG00000042563	6369	Protein-coding
TTLL7	8648	Protein-coding
ENSMMUG00000046233	7313	Protein-coding
PRKACB	76414	Protein-coding
SAMD13	0	Protein-coding
ENSMMUG00000042526	43654	Protein-coding
ENSMMUG00000000404	63673	Protein-coding
DNASE2B	79424	Protein-coding
RPF1	18	Protein-coding
ENSMMUG00000022182	7600	Protein-coding
ENSMMUG00000022183	9589	Protein-coding
CTBS	19741	Protein-coding
SSX2IP	27356	Protein-coding
LPAR3	120378	Protein-coding
MCOLN2	72704	Protein-coding
MCOLN3	20750	Protein-coding
WDR63	66904	Protein-coding
ENSMMUG00000010020	7292	Protein-coding
BCL10	7539	Protein-coding
DDAH1	41600	Protein-coding
ENSMMUG00000006583	60641	Protein-coding
ENSMMUG00000043591	1356	Protein-coding
CYR61	0	Protein-coding
ENSMMUG00000038840	28377	Protein-coding
ZNHIT6	32497	Protein-coding
ODF2L	47562	Protein-coding
CLCA2	26035	Protein-coding
CLCA1	69524	Protein-coding
CLCA4	6067	Protein-coding
pi_rheMac8_IG_2	16875	Non-coding piRNA cluster
ENSMMUG00000000813	59	Protein-coding
ENSMMUG00000031997	790	Protein-coding
SH3GLB1	0	Protein-coding
SEP15	89917	Protein-coding
HS2ST1	0	Protein-coding
ENSMMUG00000032587	91368	Protein-coding
LMO4	2959	Protein-coding
PKN2	0	Protein-coding
GTF2B	38057	Protein-coding
KYAT3	46311	Protein-coding
RBMXL1	12607	Protein-coding
ENSMMUG00000019251	28343	Protein-coding
ENSMMUG00000039128	30633	Protein-coding
GBP2	74796	Protein-coding
ENSMMUG00000041662	79104	Protein-coding
GBP7	168071	Protein-coding
ENSMMUG00000046107	205078	Protein-coding
ENSMMUG00000020157	230433	Protein-coding
ENSMMUG00000000663	128517	Protein-coding
LRRC8B	7488	Protein-coding
LRRC8C	88	Protein-coding
LRRC8D	58022	Protein-coding
ZNF326	0	Protein-coding
ENSMMUG00000031410	131372	Protein-coding
BARHL2	6201	Protein-coding
ENSMMUG00000046730	27176	Protein-coding
ZNF644	59386	Protein-coding
ENSMMUG00000020717	32557	Protein-coding
ENSMMUG00000009272	182405	Protein-coding
HFM1	134121	Protein-coding
ENSMMUG00000037958	799	Protein-coding
ENSMMUG00000039930	100005	Protein-coding
TGFBR3	136604	Protein-coding
BRDT	0	Protein-coding
EPHX4	996	Protein-coding
KIAA1107	0	Protein-coding
C1orf146	0	Protein-coding
GLMN	24235	Protein-coding
RPAP2	0	Protein-coding
ENSMMUG00000005068	9727	Protein-coding
EVI5	32222	Protein-coding
RPL5	0	Protein-coding
FAM69A	335	Protein-coding
TRAPPC2L	0	Protein-coding
MTF2	30072	Protein-coding
ENSMMUG00000045421	27351	Protein-coding
TMED5	27351	Protein-coding
CCDC18	2750	Protein-coding
FNBP1L	676	Protein-coding
BCAR3	114046	Protein-coding
ENSMMUG00000038785	92450	Protein-coding
ENSMMUG00000045959	46049	Protein-coding
ENSMMUG00000008435	11016	Protein-coding
GCLM	9368	Protein-coding
ABCA4	69485	Protein-coding
ARHGAP29	83489	Protein-coding
ABCD3	0	Protein-coding
ENSMMUG00000045060	184655	Protein-coding
SLC44A3	119409	Protein-coding
CNN3	42832	Protein-coding
TMEM56-RWDD3	89732	Protein-coding
PTBP2	0	Protein-coding
ENSMMUG00000031936	158136	Protein-coding
DPYD	353664	Protein-coding
ENSMMUG00000044373	97261	Protein-coding
ENSMMUG00000008515	661211	Protein-coding
PLPPR5	879638	Protein-coding
PLPPR4	584508	Protein-coding
PALMD	200642	Protein-coding
FRRS1	136328	Protein-coding
ENSMMUG00000021441	546	Protein-coding
SLC35A3	50	Protein-coding
HIAT1	68761	Protein-coding
SASS6	47582	Protein-coding
TRMT13	555	Protein-coding
LRRC39	15271	Protein-coding
DBT	43868	Protein-coding
RTCA	0	Protein-coding
ENSMMUG00000048196	67809	Protein-coding
CDC14A	88351	Protein-coding
ENSMMUG00000046819	126070	Protein-coding
GPR88	271519	Protein-coding
VCAM1	177033	Protein-coding
EXTL2	22169	Protein-coding
SLC30A7	0	Protein-coding
DPH5	94850	Protein-coding
S1PR1	344461	Protein-coding
OLFM3	947468	Protein-coding
COL11A1	625158	Protein-coding
RNPC3	0	Protein-coding
ENSMMUG00000031908	47313	Protein-coding
ENSMMUG00000045118	175744	Protein-coding
ENSMMUG00000015083	766954	Protein-coding
ENSMMUG00000017647	928053	Protein-coding
PRMT6	153	Protein-coding
NTNG1	3499	Protein-coding
VAV3	437192	Protein-coding
SLC25A24	47340	Protein-coding
ENSMMUG00000042487	34821	Protein-coding
ENSMMUG00000014849	76705	Protein-coding
ENSMMUG00000031785	28384	Protein-coding
ENSMMUG00000042232	76228	Protein-coding
FAM102B	98147	Protein-coding
HENMT1	16492	Protein-coding
PRPF38B	709	Protein-coding
FNDC7	20279	Protein-coding
STXBP3	52935	Protein-coding
ENSMMUG00000010159	89369	Protein-coding
GPSM2	5246	Protein-coding
CLCC1	40963	Protein-coding
ENSMMUG00000031892	27167	Protein-coding
WDR47	3991	Protein-coding
TAF13	19364	Protein-coding
KIAA1324	194	Protein-coding
ENSMMUG00000048099	2556	Protein-coding
ENSMMUG00000045858	5193	Protein-coding
SARS	56	Protein-coding
CELSR2	562	Protein-coding
PSRC1	3984	Protein-coding
ENSMMUG00000047209	25368	Protein-coding
SORT1	25368	Protein-coding
PSMA5	4024	Protein-coding
SYPL2	308	Protein-coding
ENSMMUG00000016604	3150	Protein-coding
ENSMMUG00000042314	0	Protein-coding
ATXN7L2	0	Protein-coding
CYB561D1	9759	Protein-coding
AMIGO1	19416	Protein-coding
GPR61	8469	Protein-coding
GNAI3	84	Protein-coding
GNAT2	15755	Protein-coding
AMPD2	0	Protein-coding
GSTM4	0	Protein-coding
GSTM1	29552	Protein-coding
GSTM5	46398	Protein-coding
GSTM3	4487	Protein-coding
EPS8L3	3569	Protein-coding
CSF1	71449	Protein-coding
AHCYL1	0	Protein-coding
FAM40A	524	Protein-coding
SLC6A17	2316	Protein-coding
KCNC4	680	Protein-coding
RBM15	0	Protein-coding
SLC16A4	24240	Protein-coding
ENSMMUG00000048573	8549	Protein-coding
PROK1	45187	Protein-coding
KCNA10	106389	Protein-coding
ENSMMUG00000048538	113228	Protein-coding
KCNA2	78582	Protein-coding
KCNA3	18417	Protein-coding
CD53	88761	Protein-coding
LRIF1	15806	Protein-coding
DRAM2	22539	Protein-coding
CEPT1	0	Protein-coding
CHI3L2	82140	Protein-coding
ENSMMUG00000002454	131217	Protein-coding
CHIA	129340	Protein-coding
PIFO	86618	Protein-coding
OVGP1	34957	Protein-coding
WDR77	13430	Protein-coding
ENSMMUG00000003313	162	Protein-coding
C1orf162	25254	Protein-coding
TMIGD3	34855	Protein-coding
ENSMMUG00000032219	44318	Protein-coding
RAP1A	176153	Protein-coding
C1orf183	269221	Protein-coding
ENSMMUG00000014489	228102	Protein-coding
CTTNBP2NL	0	Protein-coding
ENSMMUG00000045915	16143	Protein-coding
WNT2B	955	Protein-coding
ST7L	69989	Protein-coding
ENSMMUG00000037609	83789	Protein-coding
CAPZA1	0	Protein-coding
RHOC	14552	Protein-coding
ENSMMUG00000007767	5465	Protein-coding
FAM19A3	6885	Protein-coding
ENSMMUG00000038479	61500	Protein-coding
SLC16A1	41627	Protein-coding
LRIG2	88505	Protein-coding
MAGI3	157811	Protein-coding
PHTF1	115315	Protein-coding
RSBN1	46921	Protein-coding
PTPN22	1064	Protein-coding
BCL2L15	27327	Protein-coding
AP4B1	9922	Protein-coding
DCLRE1B	0	Protein-coding
HIPK1	0	Protein-coding
OLFML3	49887	Protein-coding
SYT6	168302	Protein-coding
TRIM33	117052	Protein-coding
ENSMMUG00000014623	27563	Protein-coding
BCAS2	55231	Protein-coding
DENND2C	79474	Protein-coding
AMPD1	1555	Protein-coding
NRAS	11939	Protein-coding
CSDE1	0	Protein-coding
SIKE1	10967	Protein-coding
SYCP1	563	Protein-coding
TSHB	159348	Protein-coding
TSPAN2	175029	Protein-coding
NGF	354755	Protein-coding
VANGL1	8874	Protein-coding
CASQ2	57934	Protein-coding
NHLH2	1652	Protein-coding
SLC22A15	136295	Protein-coding
MAB21L3	51469	Protein-coding
ENSMMUG00000041725	111165	Protein-coding
ATP1A1	45326	Protein-coding
CD58	58202	Protein-coding
ENSMMUG00000037542	36813	Protein-coding
IGSF3	2962	Protein-coding
CD2	183543	Protein-coding
PTGFRN	146321	Protein-coding
CD101	58616	Protein-coding
TTF2	0	Protein-coding
TRIM45	12089	Protein-coding
VTCN1	22786	Protein-coding
ENSMMUG00000047035	313	Protein-coding
ENSMMUG00000043784	105536	Protein-coding
FAM46C	0	Protein-coding
GDAP2	117673	Protein-coding
WDR3	0	Protein-coding
SPAG17	37041	Protein-coding
TBX15	100203	Protein-coding
WARS2	7145	Protein-coding
HAO2	201230	Protein-coding
HSD3B2	245015	Protein-coding
ENSMMUG00000047765	238199	Protein-coding
ENSMMUG00000029348	90151	Protein-coding
ENSMMUG00000041833	84116	Protein-coding
ENSMMUG00000048364	47484	Protein-coding
PHGDH	644	Protein-coding
HMGCS2	35343	Protein-coding
REG4	92476	Protein-coding
NOTCH2	18451	Protein-coding
SEC22B	43025	Protein-coding
PDE4DIP	0	Protein-coding
TXNIP	7037	Protein-coding
HFE2	20748	Protein-coding
ENSMMUG00000017320	24625	Protein-coding
ENSMMUG00000011724	82259	Protein-coding
PRKAB2	15833	Protein-coding
FMO5	10790	Protein-coding
CHD1L	322	Protein-coding
BCL9	12061	Protein-coding
ACP6	22843	Protein-coding
GJA5	2529	Protein-coding
ENSMMUG00000019890	80823	Protein-coding
GJA8	101213	Protein-coding
ENSMMUG00000043560	62241	Protein-coding
ENSMMUG00000000501	15373	Protein-coding
ENSMMUG00000000502	14383	Protein-coding
ENSMMUG00000048160	29354	Protein-coding
ENSMMUG00000048493	86106	Protein-coding
ENSMMUG00000015549	135040	Protein-coding
ENSMMUG00000039668	214851	Protein-coding
ENSMMUG00000039672	170620	Protein-coding
ENSMMUG00000013734	19422	Protein-coding
POLR3GL	10861	Protein-coding
ANKRD34A	0	Protein-coding
LIX1L	4025	Protein-coding
RBM8A	0	Protein-coding
ENSMMUG00000016049	1687	Protein-coding
PEX11B	0	Protein-coding
ITGA10	8029	Protein-coding
ANKRD35	31921	Protein-coding
PIAS3	13126	Protein-coding
NUDT17	2677	Protein-coding
POLR3C	2835	Protein-coding
RNF115	22	Protein-coding
ENSMMUG00000046023	60705	Protein-coding
CD160	91611	Protein-coding
PDZK1	91231	Protein-coding
ENSMMUG00000019640	55506	Protein-coding
ENSMMUG00000039486	13420	Protein-coding
ENSMMUG00000031758	17112	Protein-coding
ENSMMUG00000031749	81759	Protein-coding
ENSMMUG00000040630	46888	Protein-coding
ENSMMUG00000039034	27402	Protein-coding
ENSMMUG00000037862	7019	Protein-coding
FCGR1A	9509	Protein-coding
HIST2H2BF	9020	Protein-coding
HIST2H3A	714	Protein-coding
ENSMMUG00000047399	6463	Protein-coding
HIST2H2AA4	154	Protein-coding
HIST2H2BE	740	Protein-coding
HIST2H2AC	25	Protein-coding
HIST2H2AB	307	Protein-coding
BOLA1	0	Protein-coding
SV2A	4022	Protein-coding
SF3B4	4143	Protein-coding
MTMR11	807	Protein-coding
OTUD7B	16692	Protein-coding
VPS45	488	Protein-coding
PLEKHO1	0	Protein-coding
ANP32E	3486	Protein-coding
CA14	10443	Protein-coding
APH1A	2545	Protein-coding
C1orf54	3417	Protein-coding
CIART	0	Protein-coding
PRPF3	3232	Protein-coding
RPRD2	105	Protein-coding
TARS2	65663	Protein-coding
ECM1	44207	Protein-coding
ADAMTSL4	2503	Protein-coding
MCL1	1655	Protein-coding
ENSA	104194	Protein-coding
GOLPH3L	74135	Protein-coding
HORMAD1	21290	Protein-coding
CTSS	9325	Protein-coding
CTSK	74974	Protein-coding
ARNT	65544	Protein-coding
ENSMMUG00000031718	33578	Protein-coding
SETDB1	49902	Protein-coding
CERS2	46371	Protein-coding
ANXA9	27241	Protein-coding
FAM63A	12109	Protein-coding
PRUNE1	0	Protein-coding
BNIPL	12387	Protein-coding
C1orf56	435	Protein-coding
CDC42SE1	3293	Protein-coding
ENSMMUG00000010075	9458	Protein-coding
ENSMMUG00000048992	9425	Protein-coding
GABPB2	283	Protein-coding
SEMA6C	0	Protein-coding
LYSMD1	10068	Protein-coding
TNFAIP8L2	9907	Protein-coding
SCNM1	0	Protein-coding
TMOD4	4063	Protein-coding
VPS72	9773	Protein-coding
PIP5K1A	0	Protein-coding
PSMD4	30345	Protein-coding
ENSMMUG00000045007	22304	Protein-coding
ZNF687	0	Protein-coding
PI4KB	8561	Protein-coding
ENSMMUG00000013172	5105	Protein-coding
SELENBP1	16385	Protein-coding
PSMB4	55749	Protein-coding
POGZ	58892	Protein-coding
CGN	0	Protein-coding
TUFT1	0	Protein-coding
SNX27	71779	Protein-coding
pi_rheMac8_PC_SNX27	71779	Protein-coding piRNA cluster
CELF3	19394	Protein-coding
RIIAD1	6907	Protein-coding
MRPL9	3696	Protein-coding
OAZ3	260	Protein-coding
TDRKH	6914	Protein-coding
LINGO4	6535	Protein-coding
RORC	15386	Protein-coding
C2CD4D	1885	Protein-coding
THEM5	11462	Protein-coding
THEM4	34450	Protein-coding
S100A10	75877	Protein-coding
ENSMMUG00000004441	76148	Protein-coding
ENSMMUG00000045342	33617	Protein-coding
TCHHL1	26704	Protein-coding
TCHH	3685	Protein-coding
ENSMMUG00000040861	11601	Protein-coding
RPTN	35696	Protein-coding
FLG2	146209	Protein-coding
ENSMMUG00000009039	196554	Protein-coding
CRNN	202992	Protein-coding
LCE5A	297184	Protein-coding
ENSMMUG00000046528	298160	Protein-coding
CRCT1	301008	Protein-coding
ENSMMUG00000040911	349216	Protein-coding
ENSMMUG00000010286	363318	Protein-coding
ENSMMUG00000001969	439650	Protein-coding
ENSMMUG00000043054	450901	Protein-coding
ENSMMUG00000001970	462871	Protein-coding
LCE2A	473863	Protein-coding
C1orf68	495011	Protein-coding
ENSMMUG00000031674	556665	Protein-coding
ENSMMUG00000038503	567162	Protein-coding
ENSMMUG00000044320	599690	Protein-coding
LCE6A	610160	Protein-coding
SMCP	649359	Protein-coding
IVL	657604	Protein-coding
SPRR4	733152	Protein-coding
SPRR1B	723162	Protein-coding
ENSMMUG00000042871	664576	Protein-coding
ENSMMUG00000044453	628493	Protein-coding
ENSMMUG00000038982	610667	Protein-coding
ENSMMUG00000047283	593111	Protein-coding
ENSMMUG00000037610	576247	Protein-coding
ENSMMUG00000041208	567763	Protein-coding
SPRR2G	503939	Protein-coding
LELP1	438846	Protein-coding
PRR9	425251	Protein-coding
LOR	382370	Protein-coding
PGLYRP4	300941	Protein-coding
S100A9	273063	Protein-coding
S100A12	258139	Protein-coding
ENSMMUG00000045406	252140	Protein-coding
S100A8	243922	Protein-coding
ENSMMUG00000004832	236059	Protein-coding
ENSMMUG00000004833	218427	Protein-coding
S100A7L2	193006	Protein-coding
ENSMMUG00000047853	183922	Protein-coding
S100A6	108099	Protein-coding
S100A5	105593	Protein-coding
S100A4	99192	Protein-coding
S100A3	95393	Protein-coding
S100A2	81829	Protein-coding
S100A16	29951	Protein-coding
S100A14	21345	Protein-coding
S100A13	16813	Protein-coding
S100A1	6699	Protein-coding
CHTOP	0	Protein-coding
SNAPIN	586	Protein-coding
ILF2	3075	Protein-coding
NPR1	20483	Protein-coding
INTS3	0	Protein-coding
ENSMMUG00000044696	2067	Protein-coding
SLC27A3	0	Protein-coding
GATAD2B	25147	Protein-coding
ENSMMUG00000043060	71118	Protein-coding
DENND4B	7150	Protein-coding
CRTC2	0	Protein-coding
ENSMMUG00000005007	4480	Protein-coding
CREB3L4	50	Protein-coding
JTB	2700	Protein-coding
RAB13	3678	Protein-coding
NUP210L	14684	Protein-coding
ENSMMUG00000018240	14689	Protein-coding
ENSMMUG00000038250	78138	Protein-coding
TPM3	242	Protein-coding
ENSMMUG00000023686	11532	Protein-coding
C1orf189	15904	Protein-coding
C1orf43	14707	Protein-coding
UBAP2L	352	Protein-coding
HAX1	89	Protein-coding
AQP10	4835	Protein-coding
ATP8B2	0	Protein-coding
IL6R	80556	Protein-coding
ENSMMUG00000040605	86776	Protein-coding
SHE	18844	Protein-coding
TDRD10	0	Protein-coding
UBE2Q1	11795	Protein-coding
CHRNB2	5247	Protein-coding
ADAR	10066	Protein-coding
ENSMMUG00000044457	10584	Protein-coding
KCNN3	67404	Protein-coding
PMVK	14066	Protein-coding
PBXIP1	8298	Protein-coding
PYGO2	4580	Protein-coding
SHC1	68	Protein-coding
ENSMMUG00000041008	2369	Protein-coding
FLAD1	7654	Protein-coding
ZBTB7B	357	Protein-coding
DCST2	11875	Protein-coding
DCST1	30732	Protein-coding
ADAM15	12357	Protein-coding
EFNA3	0	Protein-coding
EFNA1	209	Protein-coding
SLC50A1	175	Protein-coding
DPM3	505	Protein-coding
ENSMMUG00000038130	8244	Protein-coding
KRTCAP2	5191	Protein-coding
TRIM46	489	Protein-coding
MUC1	4704	Protein-coding
THBS3	61	Protein-coding
MTX1	0	Protein-coding
GBA	4657	Protein-coding
FAM189B	2608	Protein-coding
SCAMP3	10405	Protein-coding
CLK2	10481	Protein-coding
PKLR	14744	Protein-coding
ENSMMUG00000023144	0	Protein-coding
RUSC1	2351	Protein-coding
ASH1L	10310	Protein-coding
DAP3	18	Protein-coding
ENSMMUG00000009981	0	Protein-coding
GON4L	3967	Protein-coding
SYT11	2314	Protein-coding
ENSMMUG00000018874	31069	Protein-coding
KIAA0907	21166	Protein-coding
RXFP4	11236	Protein-coding
ARHGEF2	16396	Protein-coding
SSR2	41641	Protein-coding
UBQLN4	18995	Protein-coding
LAMTOR2	0	Protein-coding
RAB25	6272	Protein-coding
LMNA	35320	Protein-coding
SEMA4A	38349	Protein-coding
ENSMMUG00000037731	22469	Protein-coding
SLC25A44	255	Protein-coding
PMF1-BGLAP	23104	Protein-coding
ENSMMUG00000000085	2033	Protein-coding
SMG5	4064	Protein-coding
ENSMMUG00000047929	0	Protein-coding
GLMP	9044	Protein-coding
CCT3	26082	Protein-coding
TSACC	0	Protein-coding
RHBG	28491	Protein-coding
ENSMMUG00000017966	16975	Protein-coding
MEF2D	8558	Protein-coding
IQGAP3	20741	Protein-coding
TTC24	8095	Protein-coding
APOA1BP	0	Protein-coding
GPATCH4	0	Protein-coding
ENSMMUG00000039157	2615	Protein-coding
ENSMMUG00000045216	1742	Protein-coding
BCAN	4530	Protein-coding
NES	7725	Protein-coding
CRABP2	6113	Protein-coding
ENSMMUG00000000037	6279	Protein-coding
RRNAD1	0	Protein-coding
MRPL24	8247	Protein-coding
HDGF	8899	Protein-coding
PRCC	26175	Protein-coding
SH2D2A	7966	Protein-coding
NTRK1	1508	Protein-coding
ARHGEF11	11318	Protein-coding
ETV3	17084	Protein-coding
FCRL5	384657	Protein-coding
FCRL4	447600	Protein-coding
FCRL3	501874	Protein-coding
FCRL2	430110	Protein-coding
FCRL1	382158	Protein-coding
CD5L	346860	Protein-coding
KIRREL	188130	Protein-coding
ELL2	2263	Protein-coding
CD1D	6	Protein-coding
CD1B	183917	Protein-coding
CD1E	188975	Protein-coding
OR10T2	258895	Protein-coding
OR10K2	283625	Protein-coding
OR10K1	331015	Protein-coding
OR10R2	343882	Protein-coding
OR6Y1	435141	Protein-coding
ENSMMUG00000000725	450053	Protein-coding
SPTA1	499480	Protein-coding
OR6K2	591615	Protein-coding
OR6N1	664692	Protein-coding
MNDA	731987	Protein-coding
PYHIN1	820720	Protein-coding
ENSMMUG00000044188	797990	Protein-coding
IFI16	788435	Protein-coding
AIM2	738104	Protein-coding
CADM3	630201	Protein-coding
ACKR1	597370	Protein-coding
FCER1A	494243	Protein-coding
OR10J3	483477	Protein-coding
ENSMMUG00000013423	449040	Protein-coding
OR10J4	344938	Protein-coding
OR10J5	236080	Protein-coding
APCS	191237	Protein-coding
CRP	62014	Protein-coding
DUSP23	0	Protein-coding
FCRL6	19673	Protein-coding
SLAMF8	45168	Protein-coding
VSIG8	56649	Protein-coding
CFAP45	29665	Protein-coding
TAGLN2	9473	Protein-coding
IGSF9	2062	Protein-coding
SLAMF9	5886	Protein-coding
PIGM	6950	Protein-coding
KCNJ10	5265	Protein-coding
IGSF8	6940	Protein-coding
ATP1A4	30656	Protein-coding
CASQ1	70880	Protein-coding
PEA15	53963	Protein-coding
ENSMMUG00000017838	50762	Protein-coding
ENSMMUG00000017841	46331	Protein-coding
COPA	5614	Protein-coding
NCSTN	0	Protein-coding
NHLH1	23827	Protein-coding
VANGL2	71783	Protein-coding
SLAMF6	149925	Protein-coding
CD84	238103	Protein-coding
SLAMF1	318164	Protein-coding
CD48	313780	Protein-coding
ENSMMUG00000031532	284326	Protein-coding
SLAMF7	277149	Protein-coding
LY9	227235	Protein-coding
CD244	195002	Protein-coding
ITLN1	148597	Protein-coding
ITLN2	83992	Protein-coding
F11R	42973	Protein-coding
TSTD1	7934	Protein-coding
USF1	6317	Protein-coding
ARHGAP30	2145	Protein-coding
ENSMMUG00000031952	19547	Protein-coding
ENSMMUG00000037768	25208	Protein-coding
KLHDC9	50752	Protein-coding
PFDN2	50734	Protein-coding
DEDD	30654	Protein-coding
NIT1	30654	Protein-coding
UFC1	192	Protein-coding
USP21	474	Protein-coding
PPOX	422	Protein-coding
B4GALT3	5116	Protein-coding
ADAMTS4	11032	Protein-coding
ENSMMUG00000004520	25966	Protein-coding
FCER1G	39790	Protein-coding
APOA2	46816	Protein-coding
NR1I3	51177	Protein-coding
TOMM40L	51177	Protein-coding
PCP4L1	84052	Protein-coding
MPZ	129710	Protein-coding
SDHC	118869	Protein-coding
CFAP126	73272	Protein-coding
ENSMMUG00000042799	37903	Protein-coding
FCGR2B	20674	Protein-coding
ENSMMUG00000039212	0	Protein-coding
FCGR3	15905	Protein-coding
FCRLA	64221	Protein-coding
ATF6	0	Protein-coding
OLFML2B	40471	Protein-coding
NOS1AP	48740	Protein-coding
ENSMMUG00000042672	250144	Protein-coding
C1orf111	184189	Protein-coding
C1orf226	179226	Protein-coding
SH2D1B	162345	Protein-coding
UHMK1	69896	Protein-coding
UAP1	341	Protein-coding
DDR2	78677	Protein-coding
HSD17B7	0	Protein-coding
ENSMMUG00000008642	5491	Protein-coding
PSEN2	0	Protein-coding
COQ8A	0	Protein-coding
CDC42BPA	51343	Protein-coding
ZNF678	114181	Protein-coding
SNAP47	0	Protein-coding
WNT9A	99334	Protein-coding
ENSMMUG00000038578	6386	Protein-coding
C1orf35	1191	Protein-coding
MRPL55	2395	Protein-coding
ENSMMUG00000048500	5587	Protein-coding
GUK1	0	Protein-coding
GJC2	7088	Protein-coding
C1orf145	8029	Protein-coding
OBSCN	0	Protein-coding
ENSMMUG00000042149	37843	Protein-coding
TRIM11	11636	Protein-coding
TRIM17	0	Protein-coding
HIST3H3	18644	Protein-coding
HIST3H2A	0	Protein-coding
HIST3H2BB	129	Protein-coding
ENSMMUG00000046737	272	Protein-coding
RNF187	0	Protein-coding
C1orf95	56520	Protein-coding
PARP1	0	Protein-coding
LIN9	0	Protein-coding
MIXL1	44777	Protein-coding
ACBD3	799	Protein-coding
ENSMMUG00000039173	31154	Protein-coding
ENSMMUG00000031483	2977	Protein-coding
SDE2	0	Protein-coding
ENSMMUG00000011435	1219	Protein-coding
ENSMMUG00000011434	0	Protein-coding
ENSMMUG00000038686	0	Protein-coding
TMEM63A	4057	Protein-coding
EPHX1	38289	Protein-coding
SRP9	13361	Protein-coding
ENAH	0	Protein-coding
LBR	0	Protein-coding
ENSMMUG00000039010	28233	Protein-coding
CNIH3	232892	Protein-coding
ENSMMUG00000023211	153778	Protein-coding
WDR26	305	Protein-coding
CNIH4	45285	Protein-coding
NVL	0	Protein-coding
DEGS1	11153	Protein-coding
FBXO28	15387	Protein-coding
ENSMMUG00000039975	77152	Protein-coding
ENSMMUG00000011149	28702	Protein-coding
TP53BP2	0	Protein-coding
CAPN2	24474	Protein-coding
CAPN8	22702	Protein-coding
ENSMMUG00000041825	11700	Protein-coding
CCDC185	2018	Protein-coding
SUSD4	6	Protein-coding
TLR5	13949	Protein-coding
DISP1	126132	Protein-coding
FAM177B	36704	Protein-coding
BROX	20152	Protein-coding
ENSMMUG00000015025	239	Protein-coding
MIA3	23041	Protein-coding
TAF1A	1062	Protein-coding
HHIPL2	3850	Protein-coding
ENSMMUG00000031593	9236	Protein-coding
DUSP10	0	Protein-coding
ENSMMUG00000037935	12066	Protein-coding
ENSMMUG00000020182	4756	Protein-coding
ENSMMUG00000015485	79041	Protein-coding
C1orf115	175830	Protein-coding
MARK1	143939	Protein-coding
ENSMMUG00000047432	65060	Protein-coding
ENSMMUG00000007790	51036	Protein-coding
RAB3GAP2	0	Protein-coding
IARS2	71406	Protein-coding
BPNT1	0	Protein-coding
EPRS	0	Protein-coding
ENSMMUG00000031442	293497	Protein-coding
LYPLAL1	37603	Protein-coding
ENSMMUG00000040092	64892	Protein-coding
TGFB2	459659	Protein-coding
RRP15	572425	Protein-coding
SPATA17	231740	Protein-coding
GPATCH2	0	Protein-coding
ENSMMUG00000011539	186564	Protein-coding
ESRRG	412256	Protein-coding
USH2A	715207	Protein-coding
ARF1	925031	Protein-coding
KCTD3	1062915	Protein-coding
KCNK2	647841	Protein-coding
UBE2C	94979	Protein-coding
CENPF	59663	Protein-coding
PTPN14	148	Protein-coding
SMYD2	72857	Protein-coding
PROX1	245892	Protein-coding
RPS6KC1	245916	Protein-coding
ANGEL2	0	Protein-coding
VASH2	24366	Protein-coding
FLVCR1	32740	Protein-coding
TATDN3	25453	Protein-coding
NSL1	84	Protein-coding
ENSMMUG00000023368	4469	Protein-coding
BATF3	0	Protein-coding
ENSMMUG00000037953	9634	Protein-coding
ATF3	61057	Protein-coding
NENF	67015	Protein-coding
TMEM206	103117	Protein-coding
PPP2R5A	74968	Protein-coding
DTL	66451	Protein-coding
INTS7	0	Protein-coding
LPGAT1	155980	Protein-coding
NEK2	0	Protein-coding
SLC30A1	290	Protein-coding
ENSMMUG00000038160	66723	Protein-coding
TRAF5	8204	Protein-coding
RCOR3	13576	Protein-coding
KCNH1	0	Protein-coding
HHAT	425021	Protein-coding
SERTAD4	9394	Protein-coding
ENSMMUG00000016349	86706	Protein-coding
DIEXF	28050	Protein-coding
IRF6	21543	Protein-coding
C1orf74	462	Protein-coding
TRAF3IP3	2150	Protein-coding
HSD11B1	46649	Protein-coding
G0S2	35377	Protein-coding
LAMB3	32852	Protein-coding
CAMK1G	71414	Protein-coding
ENSMMUG00000041464	935	Protein-coding
PLXNA2	90	Protein-coding
CD34	491	Protein-coding
ENSMMUG00000044126	1685	Protein-coding
CD46	24344	Protein-coding
ENSMMUG00000040888	22042	Protein-coding
ENSMMUG00000043749	33140	Protein-coding
ENSMMUG00000013596	122436	Protein-coding
CR2	170118	Protein-coding
ENSMMUG00000043588	106757	Protein-coding
CD55	36174	Protein-coding
ENSMMUG00000006946	132038	Protein-coding
C4BPA	91303	Protein-coding
C4BPB	46978	Protein-coding
PFKFB2	19036	Protein-coding
YOD1	784	Protein-coding
C1orf116	18605	Protein-coding
FCAMR	75043	Protein-coding
PIGR	102370	Protein-coding
FCMR	128344	Protein-coding
ENSMMUG00000040003	142301	Protein-coding
IL24	147414	Protein-coding
ENSMMUG00000041737	157979	Protein-coding
IL20	180084	Protein-coding
IL19	206497	Protein-coding
IL10	140501	Protein-coding
MAPKAPK2	99127	Protein-coding
ENSMMUG00000045320	62207	Protein-coding
DYRK3	48422	Protein-coding
EIF2D	0	Protein-coding
RASSF5	23669	Protein-coding
IKBKE	9979	Protein-coding
SRGAP2	44702	Protein-coding
ENSMMUG00000042808	50808	Protein-coding
FAM72A	184	Protein-coding
AVPR1B	82614	Protein-coding
C1orf186	94641	Protein-coding
CTSE	196274	Protein-coding
SLC26A9	135160	Protein-coding
PM20D1	72634	Protein-coding
SLC41A1	34565	Protein-coding
RAB29	0	Protein-coding
NUCKS1	662	Protein-coding
ENSMMUG00000040223	33550	Protein-coding
SLC45A3	16105	Protein-coding
ELK4	104	Protein-coding
MFSD4	27684	Protein-coding
CDK18	79784	Protein-coding
ENSMMUG00000048983	13036	Protein-coding
LEMD1	35890	Protein-coding
KLHDC8A	33424	Protein-coding
NUAK2	0	Protein-coding
TMCC2	45609	Protein-coding
ENSMMUG00000038481	38787	Protein-coding
ENSMMUG00000011746	3591	Protein-coding
DSTYK	0	Protein-coding
RBBP5	88495	Protein-coding
TMEM81	128492	Protein-coding
CNTN2	133627	Protein-coding
NFASC	193679	Protein-coding
ENSMMUG00000039756	211663	Protein-coding
LRRN2	0	Protein-coding
ENSMMUG00000031378	21241	Protein-coding
MDM4	138308	Protein-coding
PIK3C2B	81971	Protein-coding
PPP1R15B	61	Protein-coding
ENSMMUG00000041783	0	Protein-coding
PLEKHA6	66791	Protein-coding
GOLT1A	211117	Protein-coding
KISS1	234030	Protein-coding
REN	260230	Protein-coding
ETNK2	273503	Protein-coding
SOX13	264017	Protein-coding
ENSMMUG00000031372	8365	Protein-coding
ENSMMUG00000010539	6935	Protein-coding
LAX1	16751	Protein-coding
ATP2B4	55112	Protein-coding
ENSMMUG00000016477	134008	Protein-coding
OPTC	180930	Protein-coding
PRELP	164367	Protein-coding
ENSMMUG00000040155	128342	Protein-coding
ENSMMUG00000048735	76520	Protein-coding
FMOD	22236	Protein-coding
BTG2	1497	Protein-coding
CHIT1	83393	Protein-coding
CHI3L1	59356	Protein-coding
ENSMMUG00000047567	48188	Protein-coding
MYBPH	47588	Protein-coding
ADORA1	39263	Protein-coding
MYOG	44343	Protein-coding
PPFIA4	53437	Protein-coding
ENSMMUG00000039158	30586	Protein-coding
CYB5R1	8307	Protein-coding
ADIPOR1	0	Protein-coding
KLHL12	925	Protein-coding
RABIF	0	Protein-coding
ENSMMUG00000015234	15158	Protein-coding
KDM5B	1040	Protein-coding
SYT2	242914	Protein-coding
PPP1R12B	228466	Protein-coding
ENSMMUG00000046000	90420	Protein-coding
UBE2T	0	Protein-coding
LGR6	276	Protein-coding
PTPN7	17541	Protein-coding
ARL8A	77	Protein-coding
ENSMMUG00000045981	13776	Protein-coding
GPR37L1	14232	Protein-coding
ENSMMUG00000043596	76767	Protein-coding
ELF3	60709	Protein-coding
RNPEP	51043	Protein-coding
TIMM17A	13368	Protein-coding
LMOD1	8376	Protein-coding
SHISA4	66651	Protein-coding
IPO9	50651	Protein-coding
ENSMMUG00000044802	6090	Protein-coding
NAV1	9474	Protein-coding
ENSMMUG00000045761	8409	Protein-coding
CSRP1	97582	Protein-coding
ENSMMUG00000047008	70978	Protein-coding
TNNI1	23080	Protein-coding
LAD1	169	Protein-coding
PKP1	48461	Protein-coding
IGFN1	47106	Protein-coding
TMEM9	0	Protein-coding
ASCL5	31322	Protein-coding
CACNA1S	34157	Protein-coding
KIF21B	17	Protein-coding
ENSMMUG00000046860	50783	Protein-coding
GPR25	256	Protein-coding
CAMSAP2	13865	Protein-coding
DDX59	0	Protein-coding
KIF14	0	Protein-coding
ZNF281	0	Protein-coding
FAM58A	191805	Protein-coding
NR5A2	221770	Protein-coding
PTPRC	79954	Protein-coding
ATP6V1G3	144677	Protein-coding
NEK7	143762	Protein-coding
LHX9	2818	Protein-coding
C1orf53	4273	Protein-coding
pi_rheMac8_IG_4	15966	Non-coding piRNA cluster
DENND1B	143544	Protein-coding
CRB1	280559	Protein-coding
MRPS21	157721	Protein-coding
ENSMMUG00000038936	21730	Protein-coding
ASPM	59680	Protein-coding
F13B	146752	Protein-coding
CFHR5	195461	Protein-coding
ENSMMUG00000000240	283458	Protein-coding
ENSMMUG00000048642	271450	Protein-coding
ENSMMUG00000045497	207696	Protein-coding
KCNT2	349	Protein-coding
ENSMMUG00000037642	38466	Protein-coding
CDC73	137610	Protein-coding
B3GALT2	68055	Protein-coding
GLRX2	16007	Protein-coding
TROVE2	30401	Protein-coding
UCHL5	298	Protein-coding
ENSMMUG00000044222	54194	Protein-coding
RGS2	6036	Protein-coding
RGS13	150223	Protein-coding
RGS1	228325	Protein-coding
RGS18	669962	Protein-coding
ENSMMUG00000047884	1352797	Protein-coding
ENSMMUG00000049199	1349449	Protein-coding
BRINP3	1148822	Protein-coding
ENSMMUG00000010148	0	Protein-coding
ENSMMUG00000022587	1292891	Protein-coding
ENSMMUG00000047248	1181896	Protein-coding
PLA2G4A	626706	Protein-coding
PTGS2	329922	Protein-coding
PDC	72056	Protein-coding
C1H1orf27	41610	Protein-coding
TPR	0	Protein-coding
PRG4	62821	Protein-coding
HMCN1	174718	Protein-coding
IVNS1ABP	0	Protein-coding
SWT1	25031	Protein-coding
TRMT1L	110523	Protein-coding
RNF2	54909	Protein-coding
FAM129A	65527	Protein-coding
EDEM3	11	Protein-coding
ENSMMUG00000046508	124988	Protein-coding
TSEN15	23642	Protein-coding
COLGALT2	13869	Protein-coding
RGL1	124196	Protein-coding
APOBEC4	17461	Protein-coding
ENSMMUG00000047833	0	Protein-coding
NCF2	37063	Protein-coding
SMG7	75907	Protein-coding
NMNAT2	1073	Protein-coding
LAMC2	180207	Protein-coding
LAMC1	119554	Protein-coding
ENSMMUG00000042259	31491	Protein-coding
SHCBP1L	63	Protein-coding
ENSMMUG00000044565	11012	Protein-coding
DHX9	48918	Protein-coding
NPL	8508	Protein-coding
RGS8	103500	Protein-coding
RGS16	184515	Protein-coding
RNASEL	202065	Protein-coding
ENSMMUG00000031291	173223	Protein-coding
TEDDM1	25946	Protein-coding
ENSMMUG00000022885	9068	Protein-coding
ENSMMUG00000022884	2257	Protein-coding
ENSMMUG00000022883	54915	Protein-coding
ENSMMUG00000043295	330087	Protein-coding
CACNA1E	322168	Protein-coding
IER5	905	Protein-coding
MR1	31755	Protein-coding
STX6	0	Protein-coding
KIAA1614	8452	Protein-coding
XPR1	26948	Protein-coding
RNASEH2C	196858	Protein-coding
ACBD6	0	Protein-coding
ENSMMUG00000020045	42019	Protein-coding
ENSMMUG00000042861	16879	Protein-coding
ENSMMUG00000012047	16864	Protein-coding
CEP350	38953	Protein-coding
TOR1AIP1	34328	Protein-coding
TOR1AIP2	4821	Protein-coding
FAM163A	65212	Protein-coding
TDRD5	93402	Protein-coding
pi_rheMac8_IG_5	554	Non-coding piRNA cluster
ENSMMUG00000016034	2404	Protein-coding
NPHS2	15767	Protein-coding
AXDND1	33731	Protein-coding
SOAT1	12247	Protein-coding
ENSMMUG00000044194	26121	Protein-coding
ABL2	55317	Protein-coding
TOR3A	15697	Protein-coding
FAM20B	9843	Protein-coding
RALGPS2	100906	Protein-coding
ANGPTL1	129986	Protein-coding
TEX35	19427	Protein-coding
ENSMMUG00000040608	7695	Protein-coding
RASAL2	13340	Protein-coding
SEC16B	165271	Protein-coding
BRINP2	247787	Protein-coding
ASTN1	132348	Protein-coding
PAPPA2	188755	Protein-coding
ENSMMUG00000044239	102859	Protein-coding
ENSMMUG00000039541	60201	Protein-coding
TNR	377405	Protein-coding
ENSMMUG00000040147	306993	Protein-coding
KIAA0040	192523	Protein-coding
ENSMMUG00000041845	160882	Protein-coding
TNN	148359	Protein-coding
MRPS14	25760	Protein-coding
CACYBP	11008	Protein-coding
RABGAP1L	8644	Protein-coding
RC3H1	136739	Protein-coding
SERPINC1	50984	Protein-coding
pi_rheMac8_IG_6	29916	Non-coding piRNA cluster
ZBTB37	16830	Protein-coding
DARS2	10696	Protein-coding
CENPL	0	Protein-coding
KLHL20	41328	Protein-coding
ANKRD45	9000	Protein-coding
SLC9C2	74231	Protein-coding
PRDX6	9887	Protein-coding
TNFSF4	103	Protein-coding
ENSMMUG00000019542	86883	Protein-coding
TNLG2A	407502	Protein-coding
FASLG	138003	Protein-coding
SUCO	81659	Protein-coding
C1orf105	25109	Protein-coding
PIGC	237	Protein-coding
DNM3	25473	Protein-coding
METTL13	15202	Protein-coding
VAMP4	36708	Protein-coding
ENSMMUG00000023202	85058	Protein-coding
MYOC	114501	Protein-coding
PRRC2C	104358	Protein-coding
FMO4	180900	Protein-coding
FMO1	242009	Protein-coding
FMO2	332070	Protein-coding
ENSMMUG00000040433	357268	Protein-coding
ENSMMUG00000007956	387290	Protein-coding
FMO3	429377	Protein-coding
MROH9	412384	Protein-coding
ENSMMUG00000043224	76914	Protein-coding
GORAB	106032	Protein-coding
KIFAP3	173387	Protein-coding
SCYL3	364	Protein-coding
C1orf112	42821	Protein-coding
METTL18	100753	Protein-coding
SELE	165651	Protein-coding
SELL	188663	Protein-coding
SELP	144136	Protein-coding
F5	100229	Protein-coding
SLC19A2	0	Protein-coding
CCDC181	0	Protein-coding
BLZF1	41726	Protein-coding
NME7	60964	Protein-coding
ATP1B1	26095	Protein-coding
DPT	378099	Protein-coding
ENSMMUG00000013779	173172	Protein-coding
ENSMMUG00000005899	67807	Protein-coding
SFT2D2	16148	Protein-coding
TIPRL	22188	Protein-coding
GPR161	85847	Protein-coding
DCAF6	140074	Protein-coding
MPC2	0	Protein-coding
ADCY10	21526	Protein-coding
MPZL1	62511	Protein-coding
RCSD1	8782	Protein-coding
ENSMMUG00000031248	43392	Protein-coding
CREG1	0	Protein-coding
CD247	35703	Protein-coding
POU2F1	18517	Protein-coding
DUSP27	11759	Protein-coding
MAEL	33460	Protein-coding
ILDR2	13682	Protein-coding
TADA1	0	Protein-coding
POGK	15005	Protein-coding
ENSMMUG00000048178	14167	Protein-coding
ENSMMUG00000040586	47740	Protein-coding
ENSMMUG00000005721	113101	Protein-coding
ENSMMUG00000048547	0	Protein-coding
UCK2	80231	Protein-coding
TMCO1	0	Protein-coding
ALDH9A1	489	Protein-coding
MGST3	30850	Protein-coding
LRRC52	33107	Protein-coding
RXRG	151560	Protein-coding
LMX1A	116592	Protein-coding
PBX1	341010	Protein-coding
ENSMMUG00000042236	358445	Protein-coding
NUF2	33763	Protein-coding
RGS5	99539	Protein-coding
RGS4	233807	Protein-coding
ENSMMUG00000045872	159375	Protein-coding
CCDC190	41519	Protein-coding
RHOU	0	Protein-coding
ENSMMUG00000031107	282913	Protein-coding
ENSMMUG00000041811	127440	Protein-coding
RAB4A	72237	Protein-coding
ENSMMUG00000017722	18351	Protein-coding
ACTA1	2563	Protein-coding
NUP133	6039	Protein-coding
ENSMMUG00000022094	6850	Protein-coding
TAF5L	29054	Protein-coding
URB2	0	Protein-coding
GALNT2	334	Protein-coding
PGBD5	141100	Protein-coding
COG2	0	Protein-coding
AGT	58288	Protein-coding
CAPN9	119796	Protein-coding
C1orf198	29869	Protein-coding
TTC13	39295	Protein-coding
ARV1	0	Protein-coding
FAM89A	18143	Protein-coding
ENSMMUG00000044787	13895	Protein-coding
TRIM67	261	Protein-coding
C1orf131	18001	Protein-coding
ENSMMUG00000039890	17486	Protein-coding
GNPAT	12	Protein-coding
EXOC8	2275	Protein-coding
SPRTN	0	Protein-coding
EGLN1	25128	Protein-coding
TSNAX-DISC1	0	Protein-coding
DISC1	101594	Protein-coding
ENSMMUG00000045176	390938	Protein-coding
SIPA1L2	47192	Protein-coding
MAP10	231	Protein-coding
NTPCR	0	Protein-coding
PCNX2	34337	Protein-coding
DPPA3	82170	Protein-coding
KIAA1804	688	Protein-coding
KCNK1	269582	Protein-coding
SLC35F3	446	Protein-coding
COA6	0	Protein-coding
ENSMMUG00000041977	10963	Protein-coding
TARBP1	17842	Protein-coding
ENSMMUG00000049214	159059	Protein-coding
RBM34	2768	Protein-coding
ARID4B	3677	Protein-coding
ENSMMUG00000041362	0	Protein-coding
TBCE	134	Protein-coding
B3GALNT2	59606	Protein-coding
GNG4	49525	Protein-coding
LYST	14800	Protein-coding
ENSMMUG00000012725	84214	Protein-coding
NID1	51175	Protein-coding
GPR137B	37561	Protein-coding
ERO1B	76009	Protein-coding
EDARADD	108479	Protein-coding
ENSMMUG00000021239	38020	Protein-coding
LGALS8	5838	Protein-coding
ENSMMUG00000041461	48	Protein-coding
HEATR1	22872	Protein-coding
ENSMMUG00000006619	33899	Protein-coding
ACTN2	133	Protein-coding
MTR	0	Protein-coding
[truncated: 19,245 more rows]
