# Supplementary material for: A-MYB/TCFL5 regulatory architecture ensures the production of pachytene piRNAs in placental mammals
Source: RNA. 2023 Jan;29(1):30–43. doi: 10.1261/rna.079472.122 (PMC9808571; doi:10.1261/rna.079472.122)
Supplement: Supplemental Material [file supp_079472.122_Supplemental_Table_S4.xlsx]

## Sheet: Table S4
Table S4. Statistics for high-throughput sequencing datasets used in this study. Spg: spermatogonia; SpI: primary spermatocytes; SpII: secondary spermatocytes; RS: round spermatids.
Bulk RNA-seq
Sample	Raw reads without rRNA	Uniquely mapping reads	Uniquely mapping reads without PCR duplicates
4.5 dpp testis	51319478	43444416	38038723
11 dpp testis	53772486	46041846	40224128
14 dpp testis	50141952	42840340	36038243
17 dpp testis	44212402	38772424	34356705
21 dpp testis	53358580	46724584	41737969
27 dpp testis	31136816	27362860	24539997
30 dpp testis	30748450	27529938	24781980
C57BL/6J trial 1	134498624	117647186	90251078
C57BL/6J trial 2	95637032	86790004	74127335
C57BL/6J trial 3	66671694	58040120	48530732
C57BL/6J trial 4	55807890	48495294	41611358
C57BL/6J trial 5	43201384	37402470	32582523
C57BL/6J trial 6	38439284	33040470	28327809
Tcfl5 –/– trial 1	117893516	95215236	76192798
Tcfl5 –/– trial 2	105963378	92705094	79913054
small RNA-seq
Sample	All reads	All species	rRNA reads	rRNA species	Hairpin reads	Hairpin species	sncRNA reads	sncRNA species	All mapping reads	All mapping species	Uniquely mapping reads	Uniquely mapping species	piRNA cluster mapping reads	piRNA cluster mapping species	Transposon mapping reads	Transposon mapping species	Unaligned reads	Unaligned species
C57BL/6J trial 1	31527591	5355558	60275	12212	63770	6785	44240	4461	30422279	4687599	27623276	4118684	28885692	3840539	179663	52284	937024	644499
C57BL/6J trial 2	21502265	4818625	63077	14797	50905	6667	37697	5196	20644906	4228911	18550524	3662165	19492132	3485945	133145	49599	705680	563052
Tcfl5 –/– trial 1	18349831	2706691	446430	22904	227472	9348	89892	9041	16990723	2446540	14529727	2046087	13708414	1643423	462182	60875	595313	218857
Tcfl5 –/– trial 2	10928566	3721757	408792	40490	131069	10896	115588	14562	9904852	3407416	8250192	2808376	8012498	2161305	268787	90986	368263	248392
Sample	All reads	All species	Spike-in reads	Spike-in species	rRNA reads	rRNA species	Hairpin reads	Hairpin species	sncRNA reads	sncRNA species	All mapping reads	All mapping species	Uniquely mapping reads	Uniquely mapping species	piRNA cluster mapping reads	piRNA cluster mapping species	Transposon mapping reads	Transposon mapping species	Unaligned reads	Unaligned species
C57BL/6J SpI trial 1	18612719	4370981	65577	205	26525	9960	246857	12826	48995	8705	17510756	3815565	15810697	3355403	16589181	3202308	190667	81056	714007	523719
C57BL/6J SpI trial 2	19520427	4483177	76550	215	26225	9749	238861	12327	46022	8701	18393702	3914125	16655022	3452571	17466054	3294855	203896	82495	739066	538059
C57BL/6J SpI trial 3	23860310	5328478	100312	211	38775	10831	309438	14921	68135	12287	22389788	4608708	20220735	4044037	21215422	3843905	245490	99253	953860	681519
Tcfl5 +/– SpI trial 1	1384492	699105	3617	89	4674	2278	1218	570	2794	872	1288171	622509	1179349	566862	1219383	567598	8638	558184017	72786
Tcfl5 +/– SpI trial 2	5043147	1833506	9566	119	9359	4043	4924	1454	7703	1569	4751778	1613216	4352285	1463193	4508119	1428747	32882	16964259816	213103
CUT&RUN
Sample	Raw reads	Uniquely reads	Multiply mapping reads
AMYB trial 1	27100059	18544843	5459659
TCFL5 trial 1	29627232	22452442	5303101
No antibody trial 1	38039362	24989633	10389204
AMYB trial 2	43999620	32241080	9897507
TCFL5 trial 2	38887183	28330914	8528203
No antibody trial 2	34104075	24324642	8113551
ChIP-seq
Sample	Raw reads	Uniquely mapping reads	Multiply mapping reads
AMYB trial 1	53449862	34698362	14136855
AMYB input trial 1	54961995	29766356	13814536
TCFL5 trial 1	22700769	16691297	4692368
TCFL5 input trial 1	24057968	17701258	5338419
TCFL5 trial 2	23957477	17273447	5155178
TCFL5 input trial 2	30056198	21726822	7084129
TCFL5 trial 3	30925818	12564437	4306088
TCFL5 input trial 3	27216265	13371697	4698304
